# Supplementary material for: Identification of miRNAs and their targets in two Taraxacum species with contrasting rubber-producing ability
Source: Front Plant Sci. 2023 Nov 8;14:1287318. doi: 10.3389/fpls.2023.1287318 (PMC10663287; doi:10.3389/fpls.2023.1287318)
Supplement: Supplementary file 2 [file Table_1.xlsx]

## Sheet: Sheet1
Supplementary Table 1. The miRNAs identified by miRNA sequencing
miRNA_ID	Chr_ID	Strand	Precursor_Start	Precursor_End	Mature_Seq	Star_Seq	Precursor_Seq	matureHomo	starHomo
miR166a	LG01	+	16525767	16525905	TCGGACCAGGCTTCATTCCTT	GGGATGTTGGCTGGCTCGATG	CAGTGGTTTGTGGGGGATGTTGGCTGGCTCGATGCATTCACTTGCGGGAGAAAAAAAATTAACAGATTGTCTCTCTCACTATAATTCTCTGCAGAATAGGTGACAGCATCGGACCAGGCTTCATTCCTTTCAAACCCCT	miR166	miR166
miR166b	LG01	-	126892994	126893132	TCGGACCAGGCTTCATTCCCC	GGAATGTTGTCCGGCTCGATG	TTTGTTTGTGGGGAATGTTGTCCGGCTCGATGCCTACAAACCTTCATCATAGATACAATCATTCGTGGTATCTATATATACAATAGGTATGATGATGCTCTAATGTCGTCGGACCAGGCTTCATTCCCCTCAAATTTCG	miR166	miR166
miR166c	LG02	+	18119025	18119126	TCGGACCAGGCTTCATTCCCC	GGAATGTTGTGTGGCCCAAGA	CATATGTTGAGGGGAATGTTGTGTGGCCCAAGATCTTTCATTAAATCAAGTTTAGATGGGTTTGAATGATTTCGGACCAGGCTTCATTCCCCTTAACTTGTT	miR166	NA
miR166d	LG02	-	25178471	25178635	TCGGACCAGGCTTCATTCCTC	GGAATGTTGGCTGGCTCGATG	GTGGTTTGTGGGGAATGTTGGCTGGCTCGATGCATTCATCATCTTCGATTAAATGAATTTGCAGTAGAGACATATAGATATAGTTAAGCCTATATCTCTCTCTCTCGACAATTTCTTCGTATGAGATGACGGCATCGGACCAGGCTTCATTCCTCTCAAACCCAC	miR166	miR166
miR166e	LG02	-	178286001	178286246	TCGGACCAGGCTTCATTCCCC	GGAATGTTGTTTGGCTCGAGG	TTCTTTTGCGGGGAATGTTGTTTGGCTCGAGGTCACTAGAGAGCTTAGATCTCTCTCTCTATCTCTATCTCTATATACATCTATACATATAGATACAGATATATGTATCTATCTATGATGTTATAATTATGCTCAATTGGTCAACGGATCCAACATCCGTGGTCTTTGTTGATTAATGAGCTTTAGATGAATCTTGATCGCTGGATCTGGTGTACTCGGACCAGGCTTCATTCCCCCCAATTGTTG	miR166	miR166
miR166f	LG05	+	13664988	13665078	TCGGACCAGACTTCATTCCCT	AGAATGTTGTCAGGTCCGATA	TCAACAGTTAAAGAGAATGTTGTCAGGTCCGATATCGTTCTGATTGAATTTATGATGATTTCGGACCAGACTTCATTCCCTCTAATGTTTG	miR166	NA
miR166g	LG05	-	114412017	114412109	TCGGACCAGGCTTCATTCCTT	GGAATGTTGCATGGTCCAGAG	ACAGTAAGATGGAAGGAATGTTGCATGGTCCAGAGCAAGCAAATTAACTATCTGCACCGTCTTCGGACCAGGCTTCATTCCTTTCAACTTTTG	miR166	miR166
miR166h	LG05	-	127145195	127145328	TCGGACCAGGCTTCATTCCCC	GGATTGTTGTCTGGCTCGAGG	CTCTTTTGAGGGGATTGTTGTCTGGCTCGAGGTCACAAGAAAGCTCCAATCTTTCACTCTCTTTATACTTATGCATGATAAGATCATGGGTTTTCTGGTGTCGTCGGACCAGGCTTCATTCCCCTCAATTGTCC	miR166	miR166
miR166i	LG07	-	89769157	89769240	TCTCGGACCAGGCTTCATTCT	AATGAAGTTTGTTCCAAGATC	AGGTTGTTTGGAATGAAGTTTGTTCCAAGATCCTTTTTTTGGTTTTTGAGGGATCTCGGACCAGGCTTCATTCTTGACAGTCGT	miR166	miR166
miR166j	LG08	+	69073198	69073302	TCGGACCAGGCTTCATTCCTT	GGGATGTTGGCTGGCTCGGTG	GTGGTTTGTGAGGGATGTTGGCTGGCTCGGTGCAATCACTTTTTCTTATGATTTCGTATAAAAGGGTGATGGCATCGGACCAGGCTTCATTCCTTTCAAACCCTT	miR166	miR166
miR171a	LG01	-	30952122	30952221	TGATTGAGCCGTGCCAATATC	TATTGGTTCGGTTCAATAAGA	AGATGAACGAGATATTGGTTCGGTTCAATAAGAACATAATGTTCAGATGCTATGTTGATCATTGTTTTCTGATTGAGCCGTGCCAATATCATGTACATTG	miR171	miR171
miR171b	LG01	-	92919751	92919852	CGTGGTATTGGTACGGTTCATC	TGAGCCGAACCAATATCACTC	AATAGACACGGCGTGGTATTGGTACGGTTCATCAACTTTACTTCTTTGTATGTTTTGGAGTAGCCTTGACATGAGCCGAACCAATATCACTCTTGTATGTTT	miR171	miR171
miR171c	LG02	-	159829348	159829453	TTGAGCCGTGCCAATATCACGT	GAGATATTGTTACGGTTCAACC	GGTGACAAACACGAGATATTGTTACGGTTCAACCTCACTAACTTGTCAGTCAAAAGGCTGATTATATGGTCAGATTGAGCCGTGCCAATATCACGTGTCAATTTAT	miR171	NA
miR171d	LG03	+	44815273	44815364	TATTGGCCTGGTTCACTCAGA	TGATTGAGCCGTGCCAATATT	TGCAGCTATGATATTGGCCTGGTTCACTCAGATTTCTGAAAACCCATTTCAGGTTTTTATCTGATTGAGCCGTGCCAATATTTTAGTTCTCT	miR171	miR171
miR171e	LG03	-	135380261	135380371	TTGAGCCGTGCCAATATCACGT	GAGATGTTGGTGCGGTTCAATC	TAACAATAATACGAGATGTTGGTGCGGTTCAATCCAATAGCAATGCTCTTTTTTGGGGTCGAAGAGTGTCGTTTTTTGATTGAGCCGTGCCAATATCACGTATGACTACTC	miR171	miR171
miR171f	LG04	+	2682775	2682876	TTGAGCCGTGCCAATATCACT	CGATGTTGGTGAGGTTCAATC	AAATAAGAAAGCGATGTTGGTGAGGTTCAATCTGAAACCGGATTTTCAATGTTGTGAAGTACGATATTGGATTGAGCCGTGCCAATATCACTTTCGTTAGCC	miR171	miR171
miR171g	LG06	-	4322133	4322233	TGATTGAGCCGTGCCAATATC	TGTTGGAATGACTCAATCAAA	TAAAGTGATGATGTTGGAATGACTCAATCAAATCAAATATCCCAGATGAATAAACATGGTTTTTTTAGTTTGATTGAGCCGTGCCAATATCATGAACTACT	miR171	miR171
miR171h	LG06	-	100145660	100145761	TTGAGCCGCGCCAATATCACT	CGATGTTGGTAAGGTTCAATC	AAATAAGAAAGCGATGTTGGTAAGGTTCAATCCGAAAAAGAATTTACCAAGATGTAAAAGACAATCTCAGATTGAGCCGCGCCAATATCACTTTCGATTCTT	miR171	miR171
miR171i	LG08	-	85209339	85209436	TGATTGAGCCGTGCCAATATC	TATGGAGCGGCTCAATCTAA	AGAAATGCAGAGATATGGAGCGGCTCAATCTAAACACAGAGTAAGCCATTAATTACCTTCTTGATTTTGATTGAGCCGTGCCAATATCTCTCATTTTC	miR171	miR171
miR156a	LG01	-	95637317	95637423	CTGACAGAAGATAGAGAGCAC	GCTCTCTATCCTTCTGTCATC	TGGTGGTGATGCTGACAGAAGATAGAGAGCACAGATGACGAAGATGCAATCAGTGTTGTGCATCTTATTTCTTTGTGCTCTCTATCCTTCTGTCATCATCATGTAAC	miR156	miR157
miR156b	LG02	+	48171039	48171136	TGACAGAAGAGAGTGAGCAT	GCTCTCTTTCTACCTGTCAGT	TAAAATAAGCTGACAGAAGAGAGTGAGCATTCATAATTTTTGCATGAAAGAACCCATGCTATTATGTATGCTCTCTTTCTACCTGTCAGTTTTTTTTC	miR156	miR156
miR156c	LG02	-	63688104	63688215	TGACAGAAGAGAGTGAGCATA	TGCTCACTTCTCTTGCTGTCAGC	AAAAGAAAGCTGACAGAAGAGAGTGAGCATATGCAAGCAATTGTATAGAGAGATATGCTCTTGTTGTAATTATGATGCGTGTGCTCACTTCTCTTGCTGTCAGCTCCTATCG	miR156	miR156
miR156d	LG02	-	69474242	69474356	GCTCACCCTCTGTCTGTCACC	TGACAGAAGAGAGTGAGCACC	GTAAAGGGTGGTGACAGAAGAGAGTGAGCACCCATGGTCTTTCTTGCAAATAATATGTGTTCTCATGTGCTTGAAGCTATGCGTGCTCACCCTCTGTCTGTCACCCCTGCTATGT	miR156	miR156
miR156e	LG03	-	32949910	32950018	TTGACAGAAGATAGAGAGCAC	GCTCTTTATGCTTCTGTCATTA	ATGGTGGATGTTGACAGAAGATAGAGAGCACAGAGAGGACATGAAGTGCACAAATTCATATAGCACATCACTTCTTTGTGCTCTTTATGCTTCTGTCATTATCCTAAAT	miR156	miR156
miR156f	LG03	-	32950289	32950395	TTGACAGAAGATAGAGAGCAC	GCTCTTTATGCTTCTGTCATTA	ATGGTGGATGTTGACAGAAGATAGAGAGCACAAAGAGGACATGAAGTGCATAAATATGTTGCACATCACTTCTTTGTGCTCTTTATGCTTCTGTCATTATCCTAAAT	miR156	miR156
miR394a	LG01	-	99652189	99652411	TTGGCATTCTGTCCACCTCT	AGGTGGGCATACTGTCAATGG	TCAACAGAGTTCTTTGGCATTCTGTCCACCTCTCCAGTTTTCATTTATCAAAAACCAACGGGTGCAAGAGGGAAACATTGTTAAGAATAGATGTAATAAGAGTGGACACCAATATTATGTGTTATTGTATGTGTGTACAGTGTAGACAAAAGAACAAAAAAAATCTATATTTATGTGTTTATAAGGGGGTAGAGGTGGGCATACTGTCAATGGAGCTCTATTG	miR394	miR394
miR394b	LG04	-	135221641	135221863	TTGGCATTCTGTCCACCTCC	AGGTGGGCATACTGTCAATGG	TGCAGAGATCTTTGGCATTCTGTCCACCTCCCTATTCATCGATCAAAACCCACTATAGTAAAAAACATATACAAACTATTTTGTGCGTATATGTATACGTGTTTGTGTATTAGGGTTTCGTAGTTTAATTGATCTGAAAAAAAGCAAGAATCTGTGTTTTTGTGTGTGTGTAACTAGTGGGTGTAGTTTGGGAGGTGGGCATACTGTCAATGGAGCTCTGTTG	miR394	miR394
miR394c	LG08	-	68766169	68766268	TTGGCATTCTGTCCACCTCC	AGGTGGTCAGCATGCTAAAT	CAGAGCCAGTTTGGCATTCTGTCCACCTCCATGTATATGTGTTGATGGCGGTGAGGATTGTCAACAATCGGAGGTGGTCAGCATGCTAAATTAGCTCTGT	miR394	NA
miR2111	LG01	+	109181217	109181302	TAATCTGCATCCTGAGGTTT	ATTCTCGGGATGCAGATTACT	TTAGGGTCAAGTAATCTGCATCCTGAGGTTTAGTTACTAAAGTTGGTTATAACTAATTCTCGGGATGCAGATTACTTCTCCCTCAA	miR2111	NA
miR390a	LG01	+	117368727	117368822	AAGCTCAGGAGGGATAGCGCC	CGCTATCTATCTTGAGCCTCA	AATAATCTGTAAAGCTCAGGAGGGATAGCGCCTGCGTATATTGTCTCCATGTACATGGTCGAAGGCGCTATCTATCTTGAGCCTCATAGATATTTT	miR390	NA
miR390b	LG02	+	105298	105393	AAGCTCAGGAGGGATAGCATC	CGCTATCCATCCTGAGTGTCA	AACGTTTATGAAGCTCAGGAGGGATAGCATCGGAAACAAATCTTTCACTTAATATAGATTGTTTACGACGCTATCCATCCTGAGTGTCACAACTTT	miR390	miR390
miR390c	LG02	+	12818894	12818997	AAGCTCAGGAGGGATAGCGCC	CGCTATCCATCTTGAGCCTCA	AAGAATCTGTTAAGCTCAGGAGGGATAGCGCCTATACACACATATATACATATACATATATCATATCATGTGGCGCTATCCATCTTGAGCCTCACGGCTTCTTC	miR390	NA
miR167a	LG01	-	122507216	122507380	TGAAGCTGCCAGCATGATCTA	GATCATGTGGCATCTTCACC	CAGTAGCAGATGAAGCTGCCAGCATGATCTAAACTTTTCTTGAAAACCGAAATTTTATTACAGATTCTATATCTACAACAATGTGGATAGATCCCGTGGTAGTATTGGAAAATGAACAAAATCAAAGAAAAGATCAGATCATGTGGCATCTTCACCTGTTGTTGT	miR167	miR167
miR167b	LG01	-	122577740	122577850	TGAAGCTGCCAGCATGATCTA	GGTCATGTAGTCGGCTTCACT	AAGGAAAAGGTGAAGCTGCCAGCATGATCTAGCCACTGTTTTGACCTAACCTTAATGTTCACAAGCGAAAAACAGTGGCTAGGTCATGTAGTCGGCTTCACTTTTTACTTT	miR167	NA
miR167c	LG01	-	171980497	171980726	TGAAGCTGCCAGCATGATCTG	CAGGTCATCCTTGCAGCTTCA	GTCTGAGAGATTGAAGCTGCCAGCATGATCTGGAAATGCCAAACCGAGTCGCCTATGTGTGTTTGTGCGTATATTGTAGATTTTAATGAAACGTTAGATATATGGTCATTTTTGTGTGTGTGTGTTTTTTTTTTACTTTTTAGTGTAGTGTTACTGTGTTAGGATCTATTTAGGGGTAGGGTAAGGATATGATTATTACCAGGTCATCCTTGCAGCTTCAATCACTCATA	miR167	miR167
miR167d	LG02	-	18744225	18744308	TGAAGCTGCCAGCATGATCTA	GATCATCTGGCATTTTCAGC	TATTAGCGGATGAAGCTGCCAGCATGATCTAAATCTTTTTAGAAAGAAACGGTTAGATCATCTGGCATTTTCAGCTTTTAATGC	miR167	miR167
miR167e	LG02	-	18746946	18747038	TGAAGCTGCCAGCATGATCTA	GGTCATGCGGACAGCTTCACT	TGAGGAAAAAGTGAAGCTGCCAGCATGATCTAATTAAGGGTTCTTATGATATAACCTAGCTAGGTCATGCGGACAGCTTCACTCCTTCCTTTG	miR167	miR167
miR403a	LG01	+	125378908	125379029	TTAGATTCACGCACAAACTCG	TGTTTGTGCGTGAAGCTAACG	GAGACGTATTTCGTGTTTGTGCGTGAAGCTAACGATCTGAAATCTGATGGGTAGCAGCCGTAATTGATGTATGGATAGCAGGATATGTTCGTTAGATTCACGCACAAACTCGTGATACATCT	miR403	miR403
miR403b	LG02	-	23453748	23453849	TTAGATTCACGCACAAACTCG	TGTTTGTGCGTGAAGCT	GAGATGTATTTCGTGTTTGTGCGTGAAGCTAACGCTCTGAAATCTGATGTATGGATGGCAGGATATGTTGGTTAGATTCACGCACAAACTCGTAATACATCT	miR403	NA
miR403c	LG02	+	51935145	51935253	TTAGATTCACGCACAAACTCG	TGTTTGTGCGTGAAGCTAACG	TGTTTGTGCGTGAAGCTAACGCTCTGAAATCTGATGGGTAGCAGCTGTAATTGATGTATGGATGGCAAGATATGTTCGTTAGATTCACGCACAAACTCGTAATACATCT	miR403	miR403
miR403d	LG02	+	175934150	175934270	TTAGATTCACGCACAAACTC	GTTTGTGCGTGAAGCTAACG	GACGTATTTCGTGTTTGTGCGTGAAGCTAACGGTTTGAAATCTGATATGGGTAGCAGCTGTAATTGATGCATGGATGGCTGGATATGTTCGTTAGATTCACGCACAAACTCATAATACATC	miR403	miR403
miR393a	LG01	-	128975680	128975832	TCCAAAGGGATCGCATTGATCC	ATCATGTGATGTCTTTGGAAG	GGCGGAAGCTTCCAAAGGGATCGCATTGATCCGGTTTATTAGATGATGTGATTCATTCGTATTTGTTTCAGGATTATCCATCCATGGAAGCAACTCGATCTGAGATGATAATTAATAATTTGGATCATGTGATGTCTTTGGAAGTTTCCGTCA	miR393	miR393
miR393b	LG01	-	137042079	137042187	TCCAAAGGGATCGCATTGATCC	ATCATGCTATCCTTTTGGATT	CGAGAAGGCATCCAAAGGGATCGCATTGATCCCAAATCTTATATGTCGTGTGTCTATGTATGTATATTTAGTGAATTGGGATCATGCTATCCTTTTGGATTCCTCCTTT	miR393	miR393
miR319a	LG01	-	133012531	133012724	CTTGGACTGAAGGGAGCTCCC	GAGCTCCCTTCAGCCCACTC	GGAAGCGAAGGGAGCTCCCTTCAGCCCACTCATGGATGTGATTAAGGAATTGAACTAACTGCCGACTCATTCATTTAACCACTCAGTAGAAAAGGCTTCATTTTATGCTACTTTGATTGAATGAATGATGCGGGAGATCGTTTTCATACCTTTCCAATCTTTGCTTGGACTGAAGGGAGCTCCCTCGTTTTTTT	miR319	miR319
miR319b	LG02	+	179736120	179736319	TGGACCGAAGGGAGCTCCCTT	GGGAGCTTTCTTTGGTCCATC	ATTGATTGTTAACGATAACAGGGAGCTTTCTTTGGTCCATCCATGAGTAATTGTAAGATTTCAATTAGCTGCTGACTCATTCATTCAAATACTAAGTCAAGAGAGTCATGCTACTTAGTATATGAATAGATGATGCGGGAGACAAATTGGATCTTAAGCTTCTTGCGTTTGGACCGAAGGGAGCTCCCTTTGCGATCTAA	miR319	NA
miR319c	LG04	-	23371949	23372139	CTTGGACTGAAGGGAGCTCCC	GAGCTTCCTTCAGTCCACTC	AAAACGAAAGGGAGCTTCCTTCAGTCCACTCATAGGTGGGTAGAGGGTACGGATTTGCTGCCGACTCATTCATTCAAACACAATAGAAAGAACATATGGTTGACCTATTGTGAATGTGTGAATGATGCGGGAGACGAATTTAATCCTTTTCTTTTCTGTGCTTGGACTGAAGGGAGCTCCCTTATTCTATC	miR319	miR319
miR319d	LG05	+	128666660	128666845	TTGGACTGAAGGGAGCTCCCT	AGAGCTTTCTTCAATCCATTC	AAGAAAAAAAGAGAGCTTTCTTCAATCCATTCATGGGTTGTGGTAAGATTCCAATTAGCTGCCGACTCATTCATCCAAATACTAAGTCATGAGCATGATTCTTAGTAAATGAATGAATGATGCGGGAGACAAATTGGATCTTAAGTTCCCTACGGTTGGACTGAAGGGAGCTCCCTTCATACTCTC	miR319	miR319
miR319e	LG06	-	37117657	37117847	CTTGGACTGAAGGGAGCTCCC	AGAGCTTTCTTCGGTCCACTC	TGCAAAGAAAGAGAGCTTTCTTCGGTCCACTCATGGGCTGCGATAAGATATCAATTAGCTGCCGACTCATTCACCCAAATACTAAGTCAAAGAACTGGTTGTAGTGCTTGGTAAATGAGTAAATGATGCGGGAGACAAATTGAATCTTAAGTTTCCCGTACTTGGACTGAAGGGAGCTCCCTTATTCCACC	miR319	miR319
miR160a	LG01	+	142267237	142267340	TGCCTGGCTCCCTGTATGCCA	GCGTATGAGGAGCCAAGCATA	GTGTAAGTATATGCCTGGCTCCCTGTATGCCATTTTCAGAGCCCATCGGTATCTACAATGGCCTCCGTGGATGGCGTATGAGGAGCCAAGCATATTCCCCATCT	miR160	miR160
miR160b	LG02	+	27443939	27444041	GCATATAGGGAGTCGAGCATA	TGCCTGGCTCCCTGTATGCCA	GTGTGAATATATGCCTGGCTCCCTGTATGCCATTTTCAGAGCTCATCGACATATCCATGGCCTTTGTGGATGGCATATAGGGAGTCGAGCATATCTATTGTCT	miR160	miR160
miR160c	LG02	+	148926325	148926424	TGCCTGGCTCCCTGTATGCCA	GCATAGAGAGATCCAAGCATA	TTTATAGATATGCCTGGCTCCCTGTATGCCATTTGTAGAGTTCATTGACATATTCATGGCCTTTGTAGATGGCATAGAGAGATCCAAGCATATATTTAGT	miR160	NA
miR160d	LG04	-	131479322	131479420	TGCCTGGCTCCCTGTATGCCA	GCGTATGTGGAGCCATGCATA	TGTAAGTATATGCCTGGCTCCCTGTATGCCATCTGTAGAGCCTATCGCTGCAAGATGGTCTCCATGGATGGCGTATGTGGAGCCATGCATATTTTCGTC	miR160	miR160
miR164a	LG01	+	142686570	142686672	TGGAGAAGCAGGGTACGTGCA	CGCGTACCTTCCCTCTCCAAC	TCGATCTGTGATGGAGAAGCAGGGTACGTGCAAGGATATATAAGTACGTGAATTCGTTCTGGTTTATTATTGCGCGTACCTTCCCTCTCCAACATATATTTGA	miR164	NA
miR164b	LG02	-	724047	724368	TGGAGAAGCAGGGCACGTGCA	CATGTGCCCATCTTCCCCATC	GCTGAGCAAGATGGAGAAGCAGGGCACGTGCATTACTAACTCATCATGAACGCTACACTTGAATCTTAAAAACATGACAACTCTCACGTCTGATCCTTGTTGTACGTGAAGCCTTGAGGAGTGATACCATACCCACCAAGGATACATGGTTTAACATATAAACCAAACCCTAGCCACATAACCTTGATATGAGTTCTTGATCATGAGTTAATTCTTGTATGAGTGTTTAAGCTCAAACATTTATCCTTCATTTTACACTTCGTTTTGGTGGATGCAAATGAGTTAGTGGTTCATGTGCCCATCTTCCCCATCATGACCATCC	miR164	miR164
miR164c	LG04	+	26767157	26767323	TGGAGAAGCAGGGCACGTGTA	CATGTGCCCATCTTCCCCATC	GGTGAGCAAGATGGAGAAGCAGGGCACGTGTATTACTAACTCATAATTGCATCATCACCAAAATGTCAAAGACCACATCTTGAAACCAACAAACCGCCTGCGGTGGATTCCTGGTTCTGGAAATGAGTTGGTGCTTCATGTGCCCATCTTCCCCATCTTGACCACCC	miR164	miR164
miR164d	LG07	-	114748353	114748436	TGGAGAAGCAGGGTACATGCT	CATGTACACTAACTCTCCATC	ACGTTCATGCTGGAGAAGCAGGGTACATGCTAGATCTCAAATTAAATCAATCATGTGATTTCGCATGTACACTAACTCTCCATC	miR164	NA
miR164e	LG08	+	64674841	64674934	TGGAGAAGCAGGGTACGTGCA	CACGTGCTCCCCTTCTCCAAC	GAAGGTGTCGCTGGAGAAGCAGGGTACGTGCAAAGCCAAGACTTACACGCTTACTTACTTGTGCACGTGCTCCCCTTCTCCAACATCACTTTTT	miR164	miR164
miR172a	LG01	-	142915794	142915899	AGAATCTTGATGATGCTGCAT	GCGGCATCTTCAAGATTCACA	TGCTTACAGGTGCGGCATCTTCAAGATTCACATGCCATTGATGATCAACTCTTGAGTTTCTGGTAATGGGTGATGAGAATCTTGATGATGCTGCATCAGAAATCAA	miR172	miR172
miR172b	LG04	-	128479497	128479658	AGAATCTTGATGATGCTGCAG	GTAGCATCTTCAAGATTCACA	GTTCTTTCTGCTGTAGCATCTTCAAGATTCACAACAGCCTCCATTTTTAGGGTTTCATAAGGTTATTCCTTTTTCTTAAAAAGAAAAAAGAAAGCTTATCTATGGGTCCCTCATAATTTGATGGTTTGATGAGAATCTTGATGATGCTGCAGCGGCAATTAC	miR172	miR172
miR172c	LG04	+	132306272	132306365	AGAATCTTGATGATGCTGCAT	GCGGCATTATCAAGATTCACA	TGTTTACAGGTGCGGCATTATCAAGATTCACATGGTTGCCCTATTGTAAATATTTGGGAAATGAGAATCTTGATGATGCTGCATCAGAAATCAA	miR172	miR172
miR172d	LG07	-	83226905	83226997	AGAATCTTGATGATGCTGCAT	GTGGCATAATCAAGATTCACG	GTTGTTTTCCGGCGTGGCATAATCAAGATTCACGTACAAAATGCAAAGGCTTTTTGAGGATGAGAATCTTGATGATGCTGCATCGGCAATAAA	miR172	miR172
miR530	LG01	+	145655898	145656009	TGCATTTGCACCTGCACCTTA	AGGTGCAGGTGCATCTGCAGA	AGTTTTTATCTGCATTTGCACCTGCACCTTACTTCCTACTCCTCATATTTCTTCTTTTTCTCAGGGGTTTGAGGCTTTACAAAGGTGCAGGTGCATCTGCAGACGAAATGCC	miR530	miR1030
miR169a	LG01	+	161428978	161429083	CGAGTTGTCTGAGGCTGACA	CAGCCAAGGATGACTTGCC	AGGGTCTTTTGGGCAGCCAAGGATGACTTGCCATGTCCACTTTGTAGGGCTTCATGAATTCTACATGGTATGGTGGCGAGTTGTCTGAGGCTGACAAGAAAGGTTC	NA	miR169
miR169b	LG03	-	38715002	38715126	GCAAGTCTCCTTCGCTAACC	TAGCCAATGATGACTTGCCT	AGAGTGTCGTTTGGTAGCCAATGATGACTTGCCTCCTTCTTCTCCTGCAAGGGTTTTTTGGTATTTTCAAAGATCTTTGTTTGGTTAGTTTTTAGGCAAGTCTCCTTCGCTAACCTTACAATCTC	miR169	miR169
miR169c	LG03	-	38757335	38757455	GGCAGTCTCTTTGGCTAACC	TAGCCAAGGATGACTTGCCT	GTCTCGTTTGGTAGCCAAGGATGACTTGCCTGCTTCTTCTCTTTTAAGGGTTTTTTGGTCTTTTCAAATATCCTTATTTGGTTGGTTACCAGGCAGTCTCTTTGGCTAACCTCACAATCTC	miR169	miR169
miR169d	LG03	-	38769290	38769409	GGCAGTCTCTTTGGCTAACC	TAGCCAAGGATGACTTGCCT	GTGTCGTTTGGTAGCCAAGGATGACTTGCCTGTTTCTTCTCTTTCAAGGATTTTTTAGTCTTTTCAAAATCCTTGTTTGGTTGGTTATCAGGCAGTCTCTTTGGCTAACCTCACAATCTC	miR169	miR169
miR169e	LG03	-	38779729	38779882	GGCAATCTCCTTGGCTAACC	TAGCCAAGGATGACTTGCCTG	AGAGATACAAGAGAGGTCTTGCATGAAGAAAAGAGTATCGTTTGGTAGCCAAGGATGACTTGCCTGTTTCTTCTCTTTCAAGGGTTTTTCGGACTTTTCAAGATCCTTGTTTGGTTGGTTATCAGGCAATCTCCTTGGCTAACCTCACAATCTC	miR169	miR169
miR169f	LG03	-	119422374	119422503	GGAAGTCGTCTCTTGGCTCATC	TAGCCAAGGATGACTTGCCT	AGCTATTTGGATAGCCAAGGATGACTTGCCTAAATCCATGAATATATGAGGTTGTTAATTGTATTTATACAATGAACAACATGTTAAATTGGTTTCTAGGAAGTCGTCTCTTGGCTCATCTGAAACGCTC	NA	miR169
miR169g	LG07	+	86170350	86170467	GCAGTCACGCCTTGGCTAACC	TAGCCAAGGATGACTTGCCA	TAGCATCTTTTGTTTGGTAGCCAAGGATGACTTGCCACATACCATTCATGGCGGTAGCAAATAATACCCCATTATTTGGTTAATTTGGCAGTCACGCCTTGGCTAACCTCACATGCTC	NA	miR169
miR169h	LG07	+	86229767	86229884	GCAGTCACGCCTTGGCTAACC	TAGCCAAGGATGACTTGCCA	TAGCACCTTTTGTTTGGTAGCCAAGGATGACTTGCCACATACCATTCATGGTGGTAGCAAATAATACCCCATTATTTGGTTAATTTGGCAGTCACGCCTTGGCTAACCTCACATGCTC	NA	miR169
miR169i	LG07	+	86255520	86255637	GCGGTCACGCCTTGGCTAACC	TAGCCAAGGATGACTTGCCA	TAGCACCTTTTGTTTGGTAGCCAAGGATGACTTGCCACATACCATTCATGGTGGTAGCAACTAATACCCCATTATTTGGTTAATTTGGCGGTCACGCCTTGGCTAACCTAACATGCTC	NA	miR169
miR169j	LG07	+	86292379	86292492	TAGCCAGGGATGACTTGCCT	GCAGTCTGTCCTTGGCTAACT	CTCTTGTTTGGTAGCCAGGGATGACTTGCCTCATCACACTTCAAGGTGTTGGAAAAGAAACACACCTTGTCTGGTTTTAGTAGGCAGTCTGTCCTTGGCTAACTTGACATACTC	miR169	miR169
miR169k	LG07	+	86292551	86292666	GCAGTCACGCCTTGGCTAACC	TAGCCAAGGATGACTTGCCA	ATGCACATTTTGTTTGGTAGCCAAGGATGACTTGCCACATACCATTAGATGGTAGAAACAAATTCCACATTGTGTGGTTTATCAGGCAGTCACGCCTTGGCTAACCTGACATGCTC	NA	miR169
miR396a	LG02	-	56753113	56753220	TTCCACAGCTTTCTTGAACTG	GTTCAATAAAGCTGTGGGAAG	TCTTTCTGTTCTTCCACAGCTTTCTTGAACTGCATGGTCCAACACTGATCTGTTGGGGTCTATTTCAAATCTTTGCTGTTCAATAAAGCTGTGGGAAGATAGAGAGAG	miR396	miR396
miR396b	LG04	+	2770391	2770567	TTCCACAGCTTTCTTGAACTT	GTTCAAGAATGTTGTGGGAAG	TTTCATGCTTTTCCACAGCTTTCTTGAACTTTATCGATCTCAAGTTTCTCAAAAAATGTAAGTAAAAAGAGACTTGAATATGGAATCTGTTTTGGGATCTATCCAACGGTATATTGTAATTGTTAGCGTTATATATATATTGATAAAAGTTCAAGAATGTTGTGGGAAGACATGATA	miR396	miR396
miR396c	LG04	-	2816423	2816533	TTCCACAGCTTTCTTGAACTG	GTTCAATAAAGCTGTGGGAAG	TTTTTCTGTTCTTCCACAGCTTTCTTGAACTGCGTACGGTTATCCTTTAGATCTCTGTCTATTTGAGTTCGATCTTTGCGGTTCAATAAAGCTGTGGGAAGACAGAGAAAG	miR396	miR396
miR396d	LG07	-	110649101	110649238	TTCCACAGCTTTCTTGAACTT	GCTCAAGAAAGCTGTGGGAGG	ATGCCATGTTTTTCCACAGCTTTCTTGAACTTTTCAGTTTACGTGTGTGAATTGTGATCGATCTATCTCTTCTGATAGATTACTTACTTACGCTGTGTTATTAGAAAGCTCAAGAAAGCTGTGGGAGGAAATGGCGAT	miR396	miR396
miR845a	LG02	-	85712982	85713157	ATGCTCTGATACCACTTTGATA	TTTAAGTGGTTCACTGATCA	CTCTAACCTGATGCTCTGATACCACTTTGATAGGATATAGGGACACCTGAGTGCAGGTACGTCTGACAATTAGGACAGTATGCCTTGCGGTGCGGAATAAAAAACTTTCTGGTAAAATGATCTGCAGATAAATAATATCAACACGATATTTAAGTGGTTCACTGATCAGGATAATC	miR845	NA
miR845b	LG03	-	166060537	166060716	ATGCTCTGATACCACTTTGATA	TTTAAGTGGTTCACTGATCA	CTCTAACCTGATGCTCTGATACCACTTTGATAGGATAAACAGGGACTACTGAGCTCAGGTACGTCTGACAATTTGGACAGTATAACCTTGCGGTGCGGAATTAATTCTTTCTGGTAAAATAATCTGCAGATAAATAAATTATCAACACGATATTTAAGTGGTTCACTGATCAGGATAATC	miR845	NA
miR3623a	LG03	+	36491887	36492000	TTGGTGCTTGGATGAGCTTGT	GAGCTCATGAGATCAATA	AATATTAGTGATGAGCTCATGAGATCAATAGAAGACTCAAAGTTTTACATCATTGTTTTCTCCAAAAATTATGCCTCTTCCTCTTGGTGCTTGGATGAGCTTGTTAAGATAATT	miR3623	NA
miR3623b	LG08	-	45778929	45779042	TTGGTGCTTGGATGAGCTTGT	GAGCTCATCAGATCCATTC	AGAATCAGTGATGAGCTCATCAGATCCATTCAAGACTCAAAGTTTTACATCATTGTTTTCTCCAAGAACTATGCATCTTCATCTTGGTGCTTGGATGAGCTTGTGAATATAATG	miR3623	NA
miR5041	LG03	-	75500173	75500355	TTGAGAAGATGAAGATGAAGG	TTCATTTAAACATTATTTCATTA	CCGAAACATATTGAGAAGATGAAGATGAAGGAGATGATGGCTTAATGGTTTTTCTAAGATGTTATCAACGTACTGTAACGTCCCAAAAATTACAATAAATTTAAACTTTTTAATTTAAATAACCAATCCACTTTTAATAGAAGCCACGTCATTTCATTTAAACATTATTTCATTAAACCTTAA	miR5041	NA
miR7122a	LG03	+	131708996	131709106	TTAAACAGAGAAATCGCGGTCG	ACCGCGTTTCTCTGTTTAAAT	TTATCATTTGTTTAAACAGAGAAATCGCGGTCGAGAAGCTACATTGGATTTCTGATTCGAGTAGACATCGTTCTTTCTTAACCGCGTTTCTCTGTTTAAATTGACGGTCTG	miR7122	NA
miR7122b	LG06	-	13970799	13970909	TTAAACAGAGAAATCGCGGTCG	ACCGCGTTTCTCTGTTTAAAT	ATATCATTTGTTTAAACAGAGAAATCGCGGTCGAGAAACTACGTTGGATTTCTCATTCGAGTAAGCAGCGTTCTTTCTTAACCGCGTTTCTCTGTTTAAATTGATGGTTTA	miR7122	NA
miR7122c	LG06	-	13990098	13990208	TTAAACAGAGAAATCGCGGTCG	ACCGCGTTTCTCTGTTTAAAT	ATATCATTTGTTTAAACAGAGAAATCGCGGTCGAGAAGCTACGTTGGATTTCTGATTCGAGTAAGCAGCGTTCTTTCTTAACCGCGTTTCTCTGTTTAAATTGATGGTTTA	miR7122	NA
miR395a	LG03	+	154871098	154871184	GATCCTCTGAACACTTCATTG	CTGAAGTGTTTGGGGGAACTC	TATCCCTCGGAGATCCTCTGAACACTTCATTGGGATGTTTTATTTATGATAACCTACTGAAGTGTTTGGGGGAACTCCAAGTGCTAT	miR395	miR395
miR395b	LG03	+	154917163	154917248	CTGAAGTGTTTGGGGGAACT	ATCCTCCGACCACTTCATTG	TGTTCCTCAGAGATCCTCCGACCACTTCATTGGGATGTTTTAATTACGATTTCCTACTGAAGTGTTTGGGGGAACTCCAAGGGCTA	miR395	miR395
miR395c	LG03	+	154922869	154922952	GATCCTCTGAACACTTCATTG	CTGAAGTGTTTGGGAGAACTC	GTTCCTCATAGATCCTCTGAACACTTCATTGGGATGTTTTATTTACAATTTCCTACTGAAGTGTTTGGGAGAACTCCAAGGGCT	miR395	miR395
miR395d	LG03	+	154930966	154931052	CTGAAGTGTTTGGGGGAACT	ATCCTCCGAATACTTCATTG	ATGTCCCTCTGAGATCCTCCGAATACTTCATTGGGATATCTTATTTTTGATTTCTTACTGAAGTGTTTGGGGGAACTCCAAGGGCTA	miR395	NA
miR395e	LG03	+	154938928	154939011	GATCCTCCGAACACTTCATTG	CTGAAGTGTTTGGGGGAACTC	GTCCCTCAGAGATCCTCCGAACACTTCATTGGGATGTTTTAATTATGATTTCCTACTGAAGTGTTTGGGGGAACTCCAAGGGCT	miR395	miR395
miR395f	LG03	+	154955873	154955958	GATCCTCCGAACACTTCATTG	CTGAAGTGTTTGGGGGAACT	TGTCCCTCTGAGATCCTCCGAACACTTCATTGGGATGTTTTAGTTATGATTTCCTACTGAAGTGTTTGGGGGAACTCCATGGGCTA	miR395	miR395
miR395g	LG03	+	154972303	154972391	GATCCTCCGAACACTTCATTG	CTGAAGTGTTTGGCGGAACTC	TGTCCCTCAGAGATCCTCCGAACACTTCATTGGGATGTGTTTTATTTACAATTTCCTACTGAAGTGTTTGGCGGAACTCCAAGGGCTAC	miR395	miR395
miR414	LG04	+	14692163	14692270	TGATGATGATGAGGAGGATGAT	CACCTTCTTTTTCATTATATATC	TTGCCACGTCATCACCTTCTTTTTCATTATATATCTGTTCACTTTCTTCATTTGATGATGATGATGATGATGATGATGATGATGATGAGGAGGATGATGATGATAGAA	miR414	NA
miR159a	LG04	+	118047157	118047340	TTTGGATTGAAGGGAGCTCTA	GAGCTCCTTGAAGTCCAATA	GAGTTGAAGTAGAGCTCCTTGAAGTCCAATAGAGGATCCGAATGGGGATATAGAGCTGCTGGTTTATGGATCCCTCAAGTCCTATCTTTCTTGTTGTATAGGCTTTGTGGCTTGCATAAGTCAGGAGATTCATTACCCTTCTTCAGATCTTTTTTTGGATTGAAGGGAGCTCTACACCCGCTCC	miR159	miR159
miR159b	LG06	-	130436886	130437074	AGCTCTCTATCGCCTCAACCC	ATTGGGGTGAAGGGAGCTCC	TTTATGATTGGAGCTCTCTATCGCCTCAACCCTGAAGGAACTTCATTTATGGTGGTTTACGGTTGCTCTTTCATGAATGTTTGTAGGTGTAATAATAGATGTAGTGTGCATTCTAAGGTGAGCATGAAAGAGGTGTCGTGGTTCGATCGTTCTTTCGGGATTGGGGTGAAGGGAGCTCCTCTCTTAAAT	NA	miR159
miR477a	LG05	-	1931873	1931986	ACTCTCCCTCAAGGGCTTCTC	GAAGCTCTTTGAAGGAGAGACG	CAAGTTGTTAACTCTCCCTCAAGGGCTTCTCCTTTGCCTTTCCTGTTTCACACATTTATGGTGGTGTGTGTAAATTATGGCACAATAGAAGCTCTTTGAAGGAGAGACGACAAA	miR477	NA
miR477b	LG05	-	2052053	2052168	ACTCTCCCTCAAGGGCTTCTC	GGAGCTCTTTGAAGGAGAGACG	CAAGTTGTTAACTCTCCCTCAAGGGCTTCTCCTTTGCCTTTCCTGCTTCACACATTTATGGTGGTGTGTGTGTAAATTATGGCACAATAGGAGCTCTTTGAAGGAGAGACGACAAA	miR477	NA
miR477c	LG06	+	130451381	130451474	CATCTCTCCCTCAAAGACTTCT	ATGTCTTTGAGGAGGGATGGC	AGTTTTTTGCCATCTCTCCCTCAAAGACTTCTGACGTTTTTGAATGGTTAAAAGTTCCAAGTCCGATGTCTTTGAGGAGGGATGGCAAACCGTT	miR477	NA
miR3627	LG05	-	82154861	82154974	TGTCGCAGGAAAGATGGCACTT	GTGCCATTTTCATGCCACACG	AAAGGAATCGTGTCGCAGGAAAGATGGCACTTTAGACCGCATGCTACAAATTTGTGTGGTCGAAATTGGCGTGACAACTATAAGTGCCATTTTCATGCCACACGACTTCTTTTA	miR3627	NA
miR482	LG05	+	107174952	107175084	TTCCGAGGCCACCCATTCCAAT	TGGTAATGGGTACTTTGGAAGA	GTGTGAGCTGTTGGTAATGGGTACTTTGGAAGATAAAATTAAAATCATGAATTTATCTATTCAGATAAAGATTTGAAACGATCTATATGATTATGTTTTTCTTCCGAGGCCACCCATTCCAATGTCTACCCTG	miR482	NA
miR168a	LG05	+	124389110	124389246	CCCGCCTTGCATCAACTGAAT	TCGCTTGGTGCAGGTCGGGAA	GGTTTTCTGATTCGCTTGGTGCAGGTCGGGAACGGTATCGCCGGCGGGATCGTTTTTGCCTCTGTGCCTCACGGAGGACTCGTAAACCATATCGGTGAACGCCGGTCCCGCCTTGCATCAACTGAATCGGAAACCGT	miR168	miR168
miR168b	LG06	-	46056295	46056437	TCGCTTGGTACAGGTCGGGAA	CCCGCTTTGTATCAACTGAAT	GGGTTTCTGATTCGCTTGGTACAGGTCGGGAACGGCTTCGCCGGCGATGTTAGTGTTCATTATTTGGTATCTCACTCGTGTGGGAAAGAACCGATATTAGGTGATTACCGGTCCCGCTTTGTATCAACTGAATTAGAAACCGC	miR168	miR168
miR6275	LG05	+	130563967	130564061	GGAAGTAGCAACGAGAAGCTT	GCTTCTTTTTGCTGCTTCCAC	GCTTCTTTTTGCTGCTTCCACTGAAATTTGTTTGCCGTGAAGAACCAGGCGAGGAAGTCTTAGTGGAAGTAGCAACGAGAAGCTTGGAACAATCA	miR6275	NA
miR398	LG06	+	34254184	34254274	TGTGTTCTCAGGTCGCCCCT	GGTGCGCCGTGAGAACACATG	GGTATCCGGCAGGTGCGCCGTGAGAACACATGTGAAATGTACACTGAATTACGTCATGTCATGTGTTCTCAGGTCGCCCCTACAAGATTTT	miR398	NA
miR6114	LG07	+	68298973	68299106	TTCACGTCCATTGTCCCTTTC	AAAGGAATTATGGCCGTGAGG	TTGTAGCAGTGAAAGGAATTATGGCCGTGAGGGTGGCCATCACTTTGGTTGGCTCTTTCTAGAAGAAAGTAAAAGTGATAAGAGGTTGAATATATTCGAAGCCTTCACGTCCATTGTCCCTTTCACTACTCCTA	miR6114	NA
miR5037	LG07	+	109105193	109105300	CCTCAAAGGCTTCCAATACTGA	AGTGTTGGAACCCGAGAGGTT	ATTCAATAGTCCTCAAAGGCTTCCAATACTGACTCGAGTATATGAATGTCATATATATATGAATATCAAATACTGGGATAGTGTTGGAACCCGAGAGGTTTGTTGAAG	miR5037	NA
miR162	LG07	+	117005771	117005920	TCGATAAACCTCTGCATCCAG	GGATGCAGCGGTTCATCGATC	TTGGTAGACGGTCGCTGGATGCAGCGGTTCATCGATCTGTTCCCTAAGCCTCGTGAAATTCATTACTAATAATACGAAGGAGTAAGTCGAAGGTAGGAGAGAGAGGGAAAAGGAATCGGTCGATAAACCTCTGCATCCAGCGCTCACCAC	miR162	miR162
miR2275	LG08	-	78925169	78925258	TTTAGTTTCCTCCAATATCTT	GAATTGGAGTAAAGTAAACC	AAGTTGGAAGTGAGAATTGGAGTAAAGTAAACCAATCGATGTTTTGATCTACTGATTTGTTTAGTTTCCTCCAATATCTTATCTCCAATT	miR2275	NA
miRN1a	LG01	-	24509155	24509302	CAAATATTACCGTATAACCAG	AGTTATATGGTCATATTTGTG	TCCATATTAACCAGTTATATGGTCATATTTGTGTTTTCACACATCTGTAATAGCTAATCAATAAAGTGTCTGTTTTTGTCAAAAACAGTCAATTTACGGGATTGATGTGTAAAAACACAAATATTACCGTATAACCAGTTAATATAAG	NA	NA
miRN1b	LG01	+	116704969	116705115	CAAATATTACCGTATAACCAG	AGTTATATGGTCATATTTGTG	TCCATATTAACCAGTTATATGGTCATATTTGTGTTTTCACACCTCTGTAATAGCTAATCAATAAAGTGTCTATTTTTGTCAAAACAATCAATTTACGGGATTGATGTGTAAAAACACAAATATTACCGTATAACCAGTTAATATAAG	NA	NA
miRN1c	LG02	-	81788658	81788804	CAAATATTACCGTATAACCAG	AGTTATATGGTCATATTTGTG	TCCATATTAACCAGTTATATGGTCATATTTGTGTTTTCACACCTCTGTAATAGCTAATCAATAAAGTGTCTGTTTTTGTCAAAACAGTCAATTTACGAGATTGATGTGTAAAAACACAAATATTACCGTATAACCAGTTAATATAAG	NA	NA
miRN1d	LG02	+	126086301	126086446	CAAATATTACCGTATAACCAG	AGTTATATGGTCATATTTGTG	TCCATATTAACCAGTTATATGGTCATATTTGTGTTTTCACGCATCTGTAATAGCTAATCAATAAAGTGTCTATTTTTTCAAAACATTCAATATACGGGATTGATGTGTAAAAACACAAATATTACCGTATAACCAGTTAAGATAGG	NA	NA
miRN1e	LG04	-	13840197	13840343	CAAATATTACCGTATAACCAG	AGTTATATGGTCATATTTGTG	TCCATATTAACCAGTTATATGGTCATATTTGTGTTTTCACACCTCTGTAATAGCTAATCAATAAATTGTCTGTTTTTGTCAAAACAGTCAATTTACGGGATTGATGTGTAAAAATACAAATATTACCGTATAACCAGTTAATATAAG	NA	NA
miRN2a	LG01	-	111059780	111059889	TCGCCTCTAAAACTTAAGAAGA	TTCTTGAGTTTTGAGGCTATG	ACGCAGTGCCGTCGCCTCTAAAACTTAAGAAGACGTTGTCGACAAAACGACTTCCGTCTTTGTTTGGGGTTACAACGTGTTCTTGAGTTTTGAGGCTATGATACTCGTTA	NA	NA
miRN2b	LG01	+	114829148	114829256	TCGCCTCTAAAACTTAAGAAGA	TTCTTGAGTTTTGGGGCGAT	AACGCATGACATCGCCTCTAAAACTTAAGAAGACGTTGTCGACAAAACGGCTTCCGTCGTTGTTTGGGGTTACATCGTGTTCTTGAGTTTTGGGGCGATATTGCTCGCC	NA	NA
miRN3	LG01	-	111067072	111067177	TCACCTCTGAAACTCAAGAACA	TTCTTGTGTTTCGAGGTTATG	TGCAATATCATCACCTCTGAAACTCAAGAACACGTCGTCGATGGAGTCGATTCTGTCGCTTTTCGTGGCACGATGTGTTCTTGTGTTTCGAGGTTATGACGTTGGT	NA	NA
miRN4	LG01	-	111067233	111067314	TAAAACTGAGAAAAACATCGTG	CGATGTTTTTTCAGTTTTAGA	ATCGTCGTCTCTAAAACTGAGAAAAACATCGTGCGGATCGTAAGTGATGAACGATGTTTTTTCAGTTTTAGAAGTGGCTATA	NA	NA
miRN5	LG01	+	133155061	133155192	AGCTTAACAACTTTGTAATCA	ATTGCAAAGTTGTTAACCTTG	AAAGTTTGCAAGCTTAACAACTTTGTAATCATCAATTTCGGTGTCAAACCAGAATATGAAAAAATTTAAATAAATTGTTTTGGTTTGGTTTCAAAATTAATGATTGCAAAGTTGTTAACCTTGCCAGGTTTC	NA	NA
miRN6a	LG01	-	143819007	143819185	TTGATTGGTGCACGGCTGATGA	TATTGGCTCAAGCGGTTAATC	GTGGATTAGTAACTCTATTGGCTCAAGCGGTTAATCTTGATTTTGATAATGTTCACGAGATGAACAAGGGGGCAAACGATGATATCTTCCTCACAATGAATGTTCTCCATTCGATGCAGCTGGTTAGCTTCAACCAGAACAGGAAAATTGATTGGTGCACGGCTGATGAAACTGATCCA	NA	NA
miRN6b	LG01	-	143834608	143834786	TTGATTGGTGCACGGCTGATGA	TATTGGCTCAAGCGGTTAATC	GTGGATTAGTAACTCTATTGGCTCAAGCGGTTAATCTTGATTTTGATAATGTTCACGAGATGAACAAGGGGGCAAACGATGATATCTTCCTCACAATGAATGTTCTCCATTCGATGCAGCTGGTTAGCTTCAACCAGAACAGGAAAATTGATTGGTGCACGGCTGATGAAACTGATCCA	NA	NA
miRN7	LG02	+	2072489	2072573	CCCTTGACACTAGAAACTGC	TAGTTTCTAATGTGAATGGTA	CAATGATATTCCCTTGACACTAGAAACTGCACAGTAGTATTGTAAATACTGTTAGTTAGTTTCTAATGTGAATGGTACATCGTGA	NA	NA
miRN8	LG02	-	39582292	39582593	TCATTTTGGTAACAGCTTGCA	CAGTCTGTTACCAAAATGAAA	CAATACCTTTTCATTTTGGTAACAGCTTGCAACCTTTGCATATTGCATATGTGTAATTTGATGTGAACAATTTAAACGGATCATCCACTTTATTAATTCTCTCATAGTAAAACAGAGAATGATCAAAATGTTGTTTTTTCATTTGAAACGAATCTGATTAAAATGCAGCTACTTGCATCATTCTAGGTTTTCATATGAGAAGACTAATTAAGTGGATGATGTGCTTAAACTATTCAATCAAATACATCCTCTGTTAGATTCTAACAGTTGTTGCAGTCTGTTACCAAAATGAAATGGTATTC	NA	NA
miRN9	LG02	+	48269296	48269427	TAATGGAAGTATGATGCAAAC	TGGCATCGTACTTCCACTATC	TAGACGAGAATAATGGAAGTATGATGCAAACTATGTTTGATAGACACGTCCAGAATTTCATAACCATGAAATAAGGCTATATGTCGTAGCTATCCGACATAGTTGGCATCGTACTTCCACTATCCTCATTTT	NA	NA
miRN10	LG02	-	53298077	53298174	TTTTACAATTCTGCCCCTATC	TAGGGGCAGAATTGTTGAAATA	GTCAGTTAAGTTTTACAATTCTGCCCCTATCTATTATTTCTTTTTCATATAGGAACCGAAATAATAGATAGGGGCAGAATTGTTGAAATAAACCACCA	NA	NA
miRN11	LG02	-	78589036	78589238	TAGTTGTGATTATTATTCGGT	CGGATAATAATCACAATTAGA	AAATGCTTATCTCTAGTTGTGATTATTATTCGGTTTCCTTCACCGAACCAATCATGTGAGCCAGCCAACGCTTAGGTATCTCCATTAAAAGGGCTTAAATGTTCTTGATGATGTTGATCACCTTAACCGACTAAATGCCTTGGTTGGGTCACGTGATTGGTTTGGAGGAAACCGGATAATAATCACAATTAGAGATGAATATT	NA	NA
miRN12	LG02	-	78612389	78612533	CGTGATTGGTTTGGGGAAGGA	CTTCACCAAACCAATCATGTG	CTTCACCAAACCAATCATGTGAGCCAACCAATGCTTAGGTATCTCCATCGAAAGGTCTTAATTGATTTTGATGATGTTGATCACCTTAACCAACTAAATGCTTTGGTTGGGTCACGTGATTGGTTTGGGGAAGGAAGGTGAATAA	NA	NA
miRN13	LG02	+	139250557	139250653	GGTGCAACGTGGGACGCCGAGT	CCGGCGTTGTCGTTGCACCAC	TAGTTGTCAGTGGTGCAACGTGGGACGCCGAGTTAACTTAGATGGTTTATCTCCTAGTAGCATAATCCGGCGTTGTCGTTGCACCACCGATAGCTGT	NA	NA
miRN14	LG02	-	182624904	182625088	TTATGAAGGTAGTCTAGCCCAC	GGGTTAGCTTACCGTCATAATC	TTACAAAGGATTATGAAGGTAGTCTAGCCCACAGGCAACACCATTGCATATCTCGAGCCATCTTCTCTACATGAGACATGTGTATACAAAAATTTGTATCTCACAAGTGTCACGTGAGAGTTTGGTGTCTTAAGATAGTCATTGGTGTTGCGTGTGGGTTAGCTTACCGTCATAATCCTTTGCAC	NA	NA
miRN15	LG03	+	121327296	121327444	CAAATGCTAGCTCTACCGCCC	CGATAGAGCTAGCATTTGGCC	TCTGGGGAGGGCGATAGAGCTAGCATTTGGCCAGTAATCACGTATATGAGCCCTAATGGATCCAACTTCAGCAAACTTGATAGATTCTTGGTGTCCATCAACTTCTGTGATTACTGGCCAAATGCTAGCTCTACCGCCCTCCCCATGCT	NA	NA
miRN16	LG03	+	161347712	161347946	TCCTGGGCTTGCAAAAAAATC	CTTTTTTGCAAGCTCAGTAGC	CGCCAAGTCGCTCCTGGGCTTGCAAAAAAATCCGTTTATCTTTTTTAATGAGATTATCAATCTCAAAGGATGAAAAAGTTGAATAAGAAAACCCCACTAATCCCTTCATCCCTCATTGTCACTTACCAAGCAACTATATTGTGGTTTCAACGTTTCCTAATTGCAAACAATTGTTATTGTTAACCTTATCGAAGAAGATGAAGACTTTTTTGCAAGCTCAGTAGCGGGTTGACGT	NA	NA
miRN17	LG04	-	134942074	134942297	GCTTGAACGCGGATGGACCC	GTCCATCCACGTTCAAGCCC	ACTACGGATAGCAAATGTCCATCCACGTTCAAGCCCATTTTGTCCGCATTTAAAGTTTAATGGTCCACATTCAAAACTCGTTTGTCCACGTTCAAGTATCTTTTTTTTTTCTTTATACCTACGCCGGAAAAAGCCTTGAACGTGGAAGGAAAGGGCCTGAACGCGGACAAATAAACTTGAGCGCAGACGAAAGGGCTTGAACGCGGATGGACCCCTTCCATTTG	NA	NA
miRN18	LG06	+	9203155	9203261	TACCAAAGGAGTATACATCGGA	CGGTGTATACCTTTTGATATG	GATTAATACTATACCAAAGGAGTATACATCGGATTCTTTGATGAATGTTCTTTGTCGGAATTACTTCAAAAGAATTCGGTGTATACCTTTTGATATGATATTTATTG	NA	NA
miRN19a	LG06	+	9208523	9208633	CACCAAATGAATATACATCTGA	GGTGTATATTCATTTGATGTA	TCGGATACGACACCAAATGAATATACATCTGATTCTTTTGTTAATATCATGTATTTATACATTTGAATTGAGCTAAAGAATCGGTGTATATTCATTTGATGTAGTATATTC	NA	NA
miRN19b	LG06	+	9210713	9210823	CACCAAATGAATATACATCTGA	GGTGTATATTCATTTGATGTA	TCGGATACGACACCAAATGAATATACATCTGATTCTTTTGTTAATATCATGTATTTATACATTTGAATTGAGCTAAAGAATCGGTGTATATTCATTTGATGTAGTATATTC	NA	NA
miRN20	LG06	-	10773753	10773868	CTGGCGAATGCACCGTGCTTTC	AAGTCCGGTGCATTGGTCAACG	GATTTACCAGAAAGTCCGGTGCATTGGTCAACGACACTAACTATGCTCAAACTATGATGATTTTGGCATGTTGGGTTGTAGTCTCTGGCGAATGCACCGTGCTTTCTTGTAGAAAT	NA	NA
miRN21	LG06	+	44287002	44287097	TCTTATTCAAAATTAGGCGGT	CATCTAATTTTGAATAAAATT	TTCGGTGGAAATCTTATTCAAAATTAGGCGGTTTTAATAAAAAAATATATGGATTTTATTAAAACCATCTAATTTTGAATAAAATTTCCACCGCTA	NA	NA
miRN22	LG06	-	46913061	46913364	TAGATGATGATCGAGGCTTCC	AACTTCTATCGCTATTTGAGT	GTATCTCATGGAACTTCTATCGCTATTTGAGTTCAACTACTTTCACATACAACCATCTAAGAAGTTGTTTAATTAATCTTGTTTTATGTTGATGTTTAAGCTTATTTCCTGTTTCTCTAATAGTTTTTCTGGCAAGCGCTACCTAACAAACAACCTTTTTTGTCTACTCTAATAGCTGTAATCTAATGTTTTTATTCGGCAAACAGTGGAAGATTCAAAATATTAAAAGTCAGGATTCCTATTATGGGTAAGGAGAGCCTGAGTTTTGGAACTTAGATGATGATCGAGGCTTCCTTGAGATGAA	NA	NA
miRN23	LG06	-	102771942	102772048	AAAGAAACAGGTTAGACATAT	ATGTCTAACCTGTTTATTTCG	GCACGCATACAATATGTCTAACCTGTTTATTTCGTTTTTAGAACAAAAAGTCAAATGGAATGATGTTCTAAAAATGAAAGAAACAGGTTAGACATATTGTATGCGTG	NA	NA
miRN24	LG06	-	129287091	129287342	TTCTTTAGAGACTTTCTTGGCC	CGAAGAAGTCTCTAAAGATGC	CATTTCATTGCTTCTTTAGAGACTTTCTTGGCCTTATATTTCGTCTTTTTGGAATCAAGTTATCAATTTCTAAGTCAAATGTATCTTTGTGAGTCTTTATTCTTTGTATCACACATCCTTATACACCTTATCTTTTAAACCAAAAATTATGCTGAAAAAGCAAAAATGTATATATGACATAGAAATTGGTGGCATGATTCGGAAAAGTATGGACTATGAGGCGAAGAAGTCTCTAAAGATGCAATTCAATGC	NA	NA
miRN25	LG07	-	86423703	86423869	TTACTAGGATTCCGATACATG	TGTATAGGAGACCTAGTAAAA	TTTTATTTTGTATGTATAGGAGACCTAGTAAAAATGTTTATTACTTATGATTTTTGAAAAATAGCACGACCACATGGAAGATTGACTTTGAAGAGCTTGGCCACTTTTTTTTTAAAAGCGTAAGTAATGGTCATTTTTACTAGGATTCCGATACATGCATATACATA	NA	NA
miRN26	LG07	+	101517744	101517869	CGCAAAAATCGTTGGTTATC	AGCCAATGATTTTTGCGTA	CATAACTGCTGTAGCCAATGATTTTTGCGTAATTCTATTTAGCTCGTTTCATCGTAACTTTTACTCGATAATTGGTACAAGCTTCCAAACAATTTACGCAAAAATCGTTGGTTATCAGAAGTGATC	NA	NA
miRN27	LG08	+	51012343	51012539	CTTGTTGTAATGATAATTCTA	GAATTATTATTACAACAAGAG	CCCTAGGTTTAATGCATGATGTAGAATTATTATTACAACAAGAGATGAGCAAGTGCTTGTAGCACATAGGGTGAAGTTTATTTGTAATGTCAATCGGATAAAATTTTGTATCTGATTCACATTACGAATAAACTTCACGCAGTGTGCTACAAACATTTTCTCATCTCTTGTTGTAATGATAATTCTACTTCCTGGCT	NA	NA
