# Supplementary material for: Identification of miRNAs and their targets in two Taraxacum species with contrasting rubber-producing ability
Source: Front Plant Sci. 2023 Nov 8;14:1287318. doi: 10.3389/fpls.2023.1287318 (PMC10663287; doi:10.3389/fpls.2023.1287318)
Supplement: Supplementary file 3 [file Table_2.xlsx]

## Sheet: Sheet1
Supplementary Table 2. The miRNA expression levels in the latex of Tk and Ts.
Geneid	Ts_LX_1	Ts_LX_2	Ts_LX_3	Tk_LX_1	Tk_LX_2	Tk_LX_3	Change
miR166a-3p	1393	1478	1128	1689	2622	1517	Stable
miRN1a-3p	0	0	0	47	42	27	Up
miR171a-3p	7	9	6	12	8	8	Stable
miR171b-5p	592	599	512	792	1072	761	Stable
miR156a-5p	24	14	12	2	0	4	Stable
miR394a-5p	1	4	0	2	5	5	Stable
miR2111-5p	3	5	2	5	3	4	Stable
miRN2a-5p	591	682	423	2907	3604	2892	Up
miRN3-5p	3597	3348	2404	2392	2862	1993	Stable
miRN4-5p	1435	1411	1095	1797	2367	1756	Stable
miRN2b-5p	591	682	423	2908	3607	2892	Up
miRN1b-3p	0	0	0	47	42	27	Up
miR390a-5p	40	52	35	9	13	15	Down
miR167a-5p	8	5	2	3	4	8	Stable
miR167b-5p	8	6	2	5	5	6	Stable
miR403a-3p	997	740	572	1428	1683	1250	Stable
miR166b-3p	255466	212811	164345	250193	283505	215165	Stable
miR393a-5p	6	10	8	52	75	39	Up
miR319a-3p	54198	39669	30501	28999	37383	24476	Stable
miRN5-5p	45	68	22	259	329	235	Up
miR393b-5p	4	10	7	48	73	36	Up
miR160a-5p	69	68	38	48	41	26	Down
miR164a-5p	337	390	234	149	139	119	Down
miR172a-3p	83	76	42	177	328	171	Up
miRN6a-3p	26	57	34	1	0	0	Down
miRN6b-3p	26	57	34	1	0	0	Down
miR530-5p	6	7	9	21	15	8	Stable
miR169a-3p	4	5	0	32	20	23	Stable
miR167c-5p	7	13	2	8	14	13	Stable
miR390b-5p	1	0	0	1	0	0	Stable
miR164b-5p	213	240	141	64	62	49	Down
miRN7-5p	1298	1274	983	9	7	3	Down
miR390c-5p	36	45	31	11	12	7	Down
miR166c-3p	255506	212838	164358	250273	283693	215260	Stable
miR167d-5p	8	5	3	3	4	8	Stable
miR167e-5p	8	6	2	7	10	9	Stable
miR403b-3p	994	741	574	1432	1677	1266	Stable
miR166d-3p	204	203	153	206	231	181	Stable
miR160b-3p	9	3	0	1	2	0	Stable
miRN8-5p	50	85	26	384	440	270	Up
miR156b-5p	0	4	0	2	1	2	Stable
miRN9-5p	0	0	0	0	0	1	Stable
miR403c-3p	997	743	574	1437	1692	1268	Stable
miRN10-5p	0	0	0	14	17	14	Stable
miR396a-5p	10799	11234	8074	7875	11713	6690	Stable
miR156c-5p	0	26	3	3	1	0	Stable
miR156d-3p	0	0	0	0	1	0	Stable
miRN11-5p	13726	14386	10454	10586	12962	8728	Stable
miRN12-3p	3091	2706	2057	7	8	4	Down
miRN1c-3p	2	2	2	47	44	29	Up
miR845a-5p	12	12	5	0	0	1	Stable
miRN1d-3p	0	0	0	47	41	24	Up
miRN13-5p	1479	1346	1005	703	775	622	Down
miR160c-5p	69	68	38	48	41	27	Down
miR171c-3p	46	54	26	178	182	130	Up
miR403d-3p	201	163	124	261	409	261	Stable
miR166e-3p	254821	212064	163584	248714	280829	214005	Stable
miR319b-3p	6	4	1	3	4	6	Stable
miRN14-5p	1495	1792	1190	4844	6577	4788	Up
miR156e-5p	12	15	9	36	47	34	Up
miR156f-5p	9	15	8	36	47	34	Up
miR3623a-3p	48	50	39	85	73	71	Stable
miR169b-3p	2	1	1	0	0	0	Stable
miR169c-3p	0	0	0	16	31	14	Stable
miR169d-3p	0	0	0	16	31	14	Stable
miR169e-3p	0	2	3	22	35	20	Stable
miR171d-5p	2	0	0	4	3	0	Stable
miR5041-5p	0	0	0	0	0	0	Stable
miR169f-3p	1	0	1	17	24	31	Stable
miRN15-3p	28	45	14	391	370	280	Up
miR7122a-5p	426	502	336	1388	1340	1018	Up
miR171e-3p	49	59	29	183	188	136	Up
miR395a-5p	2	0	1	0	2	6	Stable
miR395b-3p	34	45	37	9	13	2	Down
miR395c-5p	2	0	1	1	2	4	Stable
miR395d-3p	23	18	18	5	8	2	Stable
miR395e-5p	3	0	5	26	39	23	Stable
miR395f-5p	3	0	1	26	33	25	Stable
miR395g-5p	6	0	2	27	37	23	Stable
miRN16-5p	0	0	0	1	9	4	Stable
miR845b-5p	12	12	5	0	0	1	Stable
miR171f-3p	24	28	14	47	76	54	Stable
miR396b-5p	1167	1042	762	694	959	655	Stable
miR396c-5p	10798	11238	8068	7876	11714	6694	Stable
miRN1e-3p	2	0	0	47	42	27	Up
miR414-3p	6	13	4	0	0	0	Stable
miR319c-3p	54300	39768	30574	29099	37536	24561	Stable
miR164c-5p	725	716	478	705	683	529	Stable
miR159a-3p	9488	8016	6001	2049	2252	1657	Down
miR172b-3p	89	93	65	14	16	11	Down
miR160d-5p	70	68	39	48	42	28	Down
miR172c-3p	83	76	42	177	328	171	Up
miRN17-3p	91	137	62	362	547	334	Up
miR394b-5p	140	150	111	388	526	406	Up
miR477a-5p	0	4	2	9	15	4	Stable
miR477b-5p	0	4	2	13	16	5	Stable
miR166f-3p	1801	1860	1409	1697	2616	1538	Stable
miR3627-5p	4	6	7	7	14	7	Stable
miR482-3p	8498	10161	7410	17931	21813	13781	Stable
miR166g-3p	1394	1473	1137	1694	2625	1519	Stable
miR168a-3p	7954	6487	6016	11415	13030	8387	Stable
miR166h-3p	255473	212812	164345	250196	283510	215168	Stable
miR319d-3p	17	5	12	23	13	18	Stable
miR6275-3p	17	20	13	19	26	13	Stable
miR171g-3p	7	13	4	13	8	11	Stable
miRN18-5p	192	228	137	256	213	150	Stable
miRN19a-5p	1090	938	687	6180	8028	5382	Up
miRN19b-5p	1090	938	687	6180	8028	5382	Up
miRN20-3p	81	92	53	785	1009	610	Up
miR7122b-5p	425	500	336	1385	1333	1013	Up
miR7122c-5p	426	502	336	1388	1340	1018	Up
miR398-3p	84	114	56	123	148	103	Stable
miR319e-3p	54133	39622	30462	28770	37139	24329	Down
miRN21-5p	0	0	3	13	6	1	Stable
miR168b-5p	6863	5135	3972	1567	2076	1299	Down
miRN22-3p	3465	3593	2324	5337	6944	5382	Stable
miR171h-3p	6	9	4	19	20	23	Stable
miRN23-3p	11	11	12	18	23	13	Stable
miRN24-5p	1	4	3	2	7	5	Stable
miR159b-5p	0	4	3	6	1	2	Stable
miR477c-5p	62	35	30	129	144	70	Stable
miR6114-3p	5	3	0	1	2	0	Stable
miR172d-3p	80	77	42	176	328	171	Up
miR169g-3p	7	0	3	38	82	40	Up
miR169h-3p	6	0	3	38	80	39	Up
miR169i-3p	0	1	1	0	0	5	Stable
miR169j-5p	1	0	0	48	87	51	Up
miR169k-3p	1	0	0	25	75	33	Up
miRN25-3p	3	7	4	4	6	6	Stable
miR166i-3p	75	77	52	150	167	143	Stable
miRN26-3p	4770	4605	3186	13367	21258	14996	Up
miR5037-5p	0	1	0	12	10	13	Stable
miR396d-5p	1179	1057	767	704	976	658	Stable
miR164d-5p	3	11	10	3	8	10	Stable
miR162-3p	5678	6112	4115	2531	2903	2221	Down
miR3623b-3p	58	54	43	104	88	90	Stable
miRN27-3p	41	57	46	80	127	76	Stable
miR164e-5p	340	397	234	152	140	120	Down
miR394c-5p	144	143	115	387	531	408	Up
miR166j-3p	1393	1478	1128	1689	2622	1517	Stable
miR2275-3p	2	1	0	0	0	0	Stable
miR171i-3p	6	6	0	8	6	7	Stable
