# Supplementary material for: Identification of miRNAs and their targets in two Taraxacum species with contrasting rubber-producing ability
Source: Front Plant Sci. 2023 Nov 8;14:1287318. doi: 10.3389/fpls.2023.1287318 (PMC10663287; doi:10.3389/fpls.2023.1287318)
Supplement: Supplementary file 4 [file Table_3.xlsx]

## Sheet: Sheet1
Supplementary Table 3. Target genes of differentially expressed miRNAs in latex predicted by TAPIR and psRNATarget.
TAPIR		psRNATarget		Overlapped target genes and annotations
miRNA	Target_gene	miRNA	Target_gene	Gene-id	Annotation
miRN2a-5p	evm.model.Contig1.108	miR164a-5p	evm.model.LG03.2517	evm.model.LG01.5377	Receptor-like protein kinase HERK 1 OS=Arabidopsis thaliana OX=3702 GN=HERK1 PE=1 SV=1
miRN2b-5p	evm.model.Contig1.108	miR164b-5p	evm.model.LG07.3896	evm.model.LG04.2726	F-box only protein 6 OS=Arabidopsis thaliana OX=3702 GN=FBX6 PE=2 SV=1
miRN14-5p	evm.model.Contig1.87	miR164e-5p	evm.model.LG03.2517	evm.model.LG02.5111	APETALA2-like protein 2 OS=Oryza sativa subsp. japonica OX=39947 GN=AP2-2 PE=1 SV=1
miR159a-3p	evm.model.LG01.1265	miRN5-5p	evm.model.LG02.2355	evm.model.LG03.5642	Squamosa promoter-binding-like protein 12 OS=Oryza sativa subsp. indica OX=39946 GN=SPL12 PE=2 SV=1
miR159a-3p	evm.model.LG01.1696	miRN5-5p	evm.model.LG02.2352	evm.model.LG01.8136	Protein argonaute 1B OS=Oryza sativa subsp. japonica OX=39947 GN=AGO1B PE=2 SV=3
miR164a-5p	evm.model.LG01.1713	miRN5-5p	evm.model.LG02.2350	evm.model.LG01.4654	Protein TRANSPORT INHIBITOR RESPONSE 1 OS=Arabidopsis thaliana OX=3702 GN=TIR1 PE=1 SV=2
miR164b-5p	evm.model.LG01.1713	miR160a-5p	evm.model.LG02.5200	evm.model.LG05.3271	Squamosa promoter-binding-like protein 12 OS=Oryza sativa subsp. indica OX=39946 GN=SPL12 PE=2 SV=1
miR164e-5p	evm.model.LG01.1713	miR160c-5p	evm.model.LG02.5200	evm.model.LG04.357	Squamosa promoter-binding-like protein 12 OS=Oryza sativa subsp. indica OX=39946 GN=SPL12 PE=2 SV=1
miR160a-5p	evm.model.LG01.2348	miR160d-5p	evm.model.LG02.5200	evm.model.LG05.3270	F-box only protein 6 OS=Arabidopsis thaliana OX=3702 GN=FBX6 PE=2 SV=1
miR160c-5p	evm.model.LG01.2348	miR164a-5p	evm.model.LG02.2023	evm.model.LG05.1902	Floral homeotic protein APETALA 2 OS=Arabidopsis thaliana OX=3702 GN=AP2 PE=1 SV=1
miR160d-5p	evm.model.LG01.2348	miR164a-5p	evm.model.LG07.3896	evm.model.LG03.243	NAC domain-containing protein 79 OS=Arabidopsis thaliana OX=3702 GN=NAC079 PE=2 SV=1
miRN19a-5p	evm.model.LG01.3647	miR164b-5p	evm.model.LG01.1713	evm.model.LG06.509	NAC domain-containing protein 100 OS=Arabidopsis thaliana OX=3702 GN=NAC100 PE=2 SV=1
miRN19b-5p	evm.model.LG01.3647	miR164e-5p	evm.model.LG02.2023	evm.model.LG02.5698	Scarecrow-like protein 6 OS=Arabidopsis thaliana OX=3702 GN=SCL6 PE=1 SV=1
miR156e-5p	evm.model.LG01.3873	miR164e-5p	evm.model.LG07.3896	evm.model.LG04.4499	F-box/kelch-repeat protein At3g06240 OS=Arabidopsis thaliana OX=3702 GN=At3g06240 PE=2 SV=1
miR156f-5p	evm.model.LG01.3873	miR171c-3p	evm.model.LG05.2085	evm.model.LG01.2348	Auxin response factor 18 OS=Oryza sativa subsp. japonica OX=39947 GN=ARF18 PE=2 SV=1
miR172a-3p	evm.model.LG01.4060	miR171e-3p	evm.model.LG05.2085	evm.model.LG07.3896	NAC domain-containing protein 100 OS=Arabidopsis thaliana OX=3702 GN=NAC100 PE=2 SV=1
miR172b-3p	evm.model.LG01.4060	miR172a-3p	evm.model.LG01.5728	evm.model.LG01.5728	APETALA2-like protein 2 OS=Oryza sativa subsp. indica OX=39946 GN=AP2-2 PE=3 SV=1
miR172c-3p	evm.model.LG01.4060	miR172a-3p	evm.model.LG01.4060	evm.model.LG04.680	Probable receptor-like protein kinase At5g38990 OS=Arabidopsis thaliana OX=3702 GN=At5g38990 PE=2 SV=1
miR172d-3p	evm.model.LG01.4060	miR172b-3p	evm.model.LG01.5728	evm.model.LG07.1715	-
miR393a-5p	evm.model.LG01.4654	miR172b-3p	evm.model.LG01.4060	evm.model.LG03.786	Floral homeotic protein APETALA 2 OS=Arabidopsis thaliana OX=3702 GN=AP2 PE=1 SV=1
miR393b-5p	evm.model.LG01.4654	miR172c-3p	evm.model.LG01.5728	evm.model.LG01.5531	APETALA2-like protein 2 OS=Oryza sativa subsp. japonica OX=39947 GN=AP2-2 PE=1 SV=1
miRN7-5p	evm.model.LG01.4665	miR172c-3p	evm.model.LG01.4060	evm.model.LG01.7518	-
miRN19a-5p	evm.model.LG01.4718	miR172d-3p	evm.model.LG01.5728	evm.model.LG01.3873	Squamosa promoter-binding-like protein 9 OS=Arabidopsis thaliana OX=3702 GN=SPL9 PE=2 SV=2
miRN19b-5p	evm.model.LG01.4718	miR172d-3p	evm.model.LG01.4060	evm.model.LG01.4060	APETALA2-like protein 1 OS=Oryza sativa subsp. indica OX=39946 GN=AP2-1 PE=2 SV=2
miRN19a-5p	evm.model.LG01.5377	miRN2a-5p	evm.model.LG08.996	evm.model.LG07.1144	Receptor-like protein kinase HERK 1 OS=Arabidopsis thaliana OX=3702 GN=HERK1 PE=1 SV=1
miRN19b-5p	evm.model.LG01.5377	miRN2b-5p	evm.model.LG08.996	evm.model.LG04.615	Ethylene-responsive transcription factor RAP2-7 OS=Arabidopsis thaliana OX=3702 GN=RAP2-7 PE=2 SV=2
miR172a-3p	evm.model.LG01.5531	miRN5-5p	evm.model.LG02.2361	evm.model.LG01.929	-
miR172b-3p	evm.model.LG01.5531	miRN8-5p	evm.model.LG02.4730	evm.model.LG02.2375	F-box/kelch-repeat protein At3g06240 OS=Arabidopsis thaliana OX=3702 GN=At3g06240 PE=2 SV=1
miR172c-3p	evm.model.LG01.5531	miRN8-5p	evm.model.LG02.4722	evm.model.LG04.1183	Protein TRANSPORT INHIBITOR RESPONSE 1 OS=Arabidopsis thaliana OX=3702 GN=TIR1 PE=1 SV=2
miR172d-3p	evm.model.LG01.5531	miRN8-5p	evm.model.LG02.4761	evm.model.LG01.6055	-
miR160a-5p	evm.model.LG01.5621	miRN8-5p	evm.model.LG02.4741	evm.model.LG03.2517	NAC domain-containing protein 79 OS=Arabidopsis thaliana OX=3702 GN=NAC079 PE=2 SV=1
miR160c-5p	evm.model.LG01.5621	miRN8-5p	evm.model.LG02.4721	evm.model.LG04.4497	F-box protein CPR1 OS=Arabidopsis thaliana OX=3702 GN=CPR1 PE=1 SV=2
miR160d-5p	evm.model.LG01.5621	miRN8-5p	evm.model.LG02.4745	evm.model.LG04.4251	Putative receptor-like protein kinase At5g39000 OS=Arabidopsis thaliana OX=3702 GN=At5g39000 PE=3 SV=1
miR172a-3p	evm.model.LG01.5728	miR160a-5p	evm.model.LG01.2348	evm.model.LG07.1712	-
miR172b-3p	evm.model.LG01.5728	miR160a-5p	evm.model.LG04.4379	evm.model.LG02.4445	F-box protein CPR1 OS=Arabidopsis thaliana OX=3702 GN=CPR1 PE=1 SV=2
miR172c-3p	evm.model.LG01.5728	miR160a-5p	evm.model.LG01.5621	evm.model.LG06.696	Ethylene-responsive transcription factor 13 OS=Arabidopsis thaliana OX=3702 GN=ERF13 PE=2 SV=2
miR172d-3p	evm.model.LG01.5728	miR160a-5p	evm.model.LG01.6149	evm.model.LG03.4628	TMV resistance protein N OS=Nicotiana glutinosa OX=35889 GN=N PE=1 SV=1
miRN8-5p	evm.model.LG01.6055	miR160c-5p	evm.model.LG01.2348	evm.model.LG06.2427	Pto-interacting protein 1 OS=Solanum lycopersicum OX=4081 GN=PTI1 PE=1 SV=2
miR160a-5p	evm.model.LG01.6149	miR160c-5p	evm.model.LG04.4379	evm.model.LG04.89	Topless-related protein 4 OS=Arabidopsis thaliana OX=3702 GN=TPR4 PE=1 SV=2
miR160c-5p	evm.model.LG01.6149	miR160c-5p	evm.model.LG01.5621	evm.model.LG03.4320	TMV resistance protein N OS=Nicotiana glutinosa OX=35889 GN=N PE=1 SV=1
miR160d-5p	evm.model.LG01.6149	miR160c-5p	evm.model.LG01.6149	evm.model.LG07.596	TMV resistance protein N OS=Nicotiana glutinosa OX=35889 GN=N PE=1 SV=1
miRN20-3p	evm.model.LG01.6570	miR160d-5p	evm.model.LG01.2348	evm.model.LG06.290	Squamosa promoter-binding-like protein 13B OS=Arabidopsis thaliana OX=3702 GN=SPL13B PE=3 SV=1
miR172a-3p	evm.model.LG01.6667	miR160d-5p	evm.model.LG04.4379	evm.model.LG03.1086	Scarecrow-like protein 15 OS=Arabidopsis thaliana OX=3702 GN=SCL15 PE=1 SV=3
miR172b-3p	evm.model.LG01.6667	miR160d-5p	evm.model.LG01.5621	evm.model.LG02.2365	F-box/kelch-repeat protein At3g06240 OS=Arabidopsis thaliana OX=3702 GN=At3g06240 PE=2 SV=1
miR172c-3p	evm.model.LG01.6667	miR160d-5p	evm.model.LG01.6149	evm.model.LG01.6667	Floral homeotic protein APETALA 2 OS=Arabidopsis thaliana OX=3702 GN=AP2 PE=1 SV=1
miR172d-3p	evm.model.LG01.6667	miR164a-5p	evm.model.LG01.1713	evm.model.LG06.2304	Receptor-like protein kinase HERK 1 OS=Arabidopsis thaliana OX=3702 GN=HERK1 PE=1 SV=1
miRN12-3p	evm.model.LG01.6968	miR164b-5p	evm.model.LG06.1	evm.model.LG01.6149	Auxin response factor 18 OS=Oryza sativa subsp. japonica OX=39947 GN=ARF18 PE=2 SV=1
miRN8-5p	evm.model.LG01.7355	miR164b-5p	evm.model.LG06.509	evm.model.LG07.3734	Protein DETOXIFICATION 31 OS=Arabidopsis thaliana OX=3702 GN=DTX31 PE=2 SV=1
miRN8-5p	evm.model.LG01.7518	miR164b-5p	evm.model.LG03.2517	evm.model.LG04.787	TMV resistance protein N OS=Nicotiana glutinosa OX=35889 GN=N PE=1 SV=1
miRN26-3p	evm.model.LG01.752	miR164e-5p	evm.model.LG01.1713	evm.model.LG02.1997	-
miR159a-3p	evm.model.LG01.7845	miR393a-5p	evm.model.LG01.4654	evm.model.LG02.2363	F-box protein CPR1 OS=Arabidopsis thaliana OX=3702 GN=CPR1 PE=1 SV=2
miR319e-3p	evm.model.LG01.7845	miR393a-5p	evm.model.LG02.1135	evm.model.LG02.2367	F-box protein CPR1 OS=Arabidopsis thaliana OX=3702 GN=CPR1 PE=1 SV=2
miR394b-5p	evm.model.LG01.8102	miR393b-5p	evm.model.LG01.4654	evm.model.LG08.1058	TMV resistance protein N OS=Nicotiana glutinosa OX=35889 GN=N PE=1 SV=1
miR394c-5p	evm.model.LG01.8102	miR393b-5p	evm.model.LG02.1135	evm.model.LG07.2785	Two-component response regulator ARR1 OS=Arabidopsis thaliana OX=3702 GN=ARR1 PE=1 SV=2
miR168b-5p	evm.model.LG01.8136	miR394b-5p	evm.model.LG04.2726	evm.model.LG08.1808	TMV resistance protein N OS=Nicotiana glutinosa OX=35889 GN=N PE=1 SV=1
miRN19a-5p	evm.model.LG01.8768	miR394b-5p	evm.model.LG05.3270	evm.model.LG04.1507	Putative receptor-like protein kinase At5g39000 OS=Arabidopsis thaliana OX=3702 GN=At5g39000 PE=3 SV=1
miRN19b-5p	evm.model.LG01.8768	miR394c-5p	evm.model.LG04.2726	evm.model.LG02.491	Receptor-like protein kinase HERK 1 OS=Arabidopsis thaliana OX=3702 GN=HERK1 PE=1 SV=1
miR172a-3p	evm.model.LG01.929	miR394c-5p	evm.model.LG05.3270	evm.model.LG02.5200	Auxin response factor 18 OS=Oryza sativa subsp. japonica OX=39947 GN=ARF18 PE=2 SV=1
miR172b-3p	evm.model.LG01.929	miRN19a-5p	evm.model.LG06.2461	evm.model.LG06.2265	Receptor-like protein kinase FERONIA OS=Arabidopsis thaliana OX=3702 GN=FER PE=1 SV=1
miR172c-3p	evm.model.LG01.929	miRN19b-5p	evm.model.LG06.2461	evm.model.LG08.996	TMV resistance protein N OS=Nicotiana glutinosa OX=35889 GN=N PE=1 SV=1
miR172d-3p	evm.model.LG01.929	miR156e-5p	evm.model.LG03.5642	evm.model.LG08.216	Receptor-like protein kinase FERONIA OS=Arabidopsis thaliana OX=3702 GN=FER PE=1 SV=1
miR393a-5p	evm.model.LG02.1135	miR156e-5p	evm.model.LG05.3271	evm.model.LG06.2461	Putative cyclic nucleotide-gated ion channel 9 OS=Arabidopsis thaliana OX=3702 GN=CNGC9 PE=3 SV=1
miR393b-5p	evm.model.LG02.1135	miR156e-5p	evm.model.LG01.3873	evm.model.LG05.3209	Putative pentatricopeptide repeat-containing protein At1g12700, mitochondrial OS=Arabidopsis thaliana OX=3702 GN=At1g12700 PE=3 SV=1
miR395b-3p	evm.model.LG02.1267	miR156f-5p	evm.model.LG03.5642	evm.model.LG04.4250	Putative receptor-like protein kinase At5g39000 OS=Arabidopsis thaliana OX=3702 GN=At5g39000 PE=3 SV=1
miR159a-3p	evm.model.LG02.1919	miR156f-5p	evm.model.LG05.3271	evm.model.LG04.1508	Receptor-like protein kinase FERONIA OS=Arabidopsis thaliana OX=3702 GN=FER PE=1 SV=1
miR159a-3p	evm.model.LG02.1997	miR156f-5p	evm.model.LG01.3873	evm.model.LG01.8768	Putative receptor-like protein kinase At5g39000 OS=Arabidopsis thaliana OX=3702 GN=At5g39000 PE=3 SV=1
miR164a-5p	evm.model.LG02.2023	miR159a-3p	evm.model.LG01.1696	evm.model.LG05.368	PR5-like receptor kinase OS=Arabidopsis thaliana OX=3702 GN=PR5K PE=1 SV=1
miR164b-5p	evm.model.LG02.2023	miR159a-3p	evm.model.LG01.8432	evm.model.LG06.697	Ethylene-responsive transcription factor 13 OS=Arabidopsis thaliana OX=3702 GN=ERF13 PE=2 SV=2
miR164e-5p	evm.model.LG02.2023	miR159a-3p	evm.model.LG08.64	evm.model.LG01.5621	Auxin response factor 18 OS=Oryza sativa subsp. japonica OX=39947 GN=ARF18 PE=2 SV=1
miRN19a-5p	evm.model.LG02.2141	miR164a-5p	evm.model.LG06.1	evm.model.LG02.1135	Protein TRANSPORT INHIBITOR RESPONSE 1 OS=Arabidopsis thaliana OX=3702 GN=TIR1 PE=1 SV=2
miRN19b-5p	evm.model.LG02.2141	miR164a-5p	evm.model.LG06.509	evm.model.LG01.4718	Receptor-like protein kinase ANXUR2 OS=Arabidopsis thaliana OX=3702 GN=ANX2 PE=1 SV=1
miR394b-5p	evm.model.LG02.2343	miR164b-5p	evm.model.LG02.2023	evm.model.LG01.6570	Probable galacturonosyltransferase 9 OS=Arabidopsis thaliana OX=3702 GN=GAUT9 PE=2 SV=1
miR394c-5p	evm.model.LG02.2343	miR164e-5p	evm.model.LG06.1	evm.model.LG08.384	Putative receptor-like protein kinase At5g39000 OS=Arabidopsis thaliana OX=3702 GN=At5g39000 PE=3 SV=1
miRN5-5p	evm.model.LG02.2350	miR164e-5p	evm.model.LG06.509	evm.model.LG06.2426	Receptor-like protein kinase HERK 1 OS=Arabidopsis thaliana OX=3702 GN=HERK1 PE=1 SV=1
miRN5-5p	evm.model.LG02.2352	miR171c-3p	evm.model.LG02.5698	evm.model.LG08.1803	TMV resistance protein N OS=Nicotiana glutinosa OX=35889 GN=N PE=1 SV=1
miRN5-5p	evm.model.LG02.2353	miR171c-3p	evm.model.LG06.4588	evm.model.LG08.1614	-
miRN5-5p	evm.model.LG02.2355	miR171c-3p	evm.model.LG03.1086	evm.model.LG04.4560	Putative pentatricopeptide repeat-containing protein At1g12700, mitochondrial OS=Arabidopsis thaliana OX=3702 GN=At1g12700 PE=3 SV=1
miRN5-5p	evm.model.LG02.2356	miR171e-3p	evm.model.LG02.5698	evm.model.Contig1.108	TMV resistance protein N OS=Nicotiana glutinosa OX=35889 GN=N PE=1 SV=1
miRN5-5p	evm.model.LG02.2357	miR171e-3p	evm.model.LG06.4588	evm.model.LG04.4581	Probable serine/threonine-protein kinase PBL4 OS=Arabidopsis thaliana OX=3702 GN=PBL4 PE=2 SV=1
miRN5-5p	evm.model.LG02.2361	miR171e-3p	evm.model.LG03.1086	evm.model.LG04.1509	Receptor-like protein kinase FERONIA OS=Arabidopsis thaliana OX=3702 GN=FER PE=1 SV=1
miRN5-5p	evm.model.LG02.2363	miR172a-3p	evm.model.LG01.6667	evm.model.LG02.4761	Putative pentatricopeptide repeat-containing protein At1g12700, mitochondrial OS=Arabidopsis thaliana OX=3702 GN=At1g12700 PE=3 SV=1
miRN5-5p	evm.model.LG02.2365	miR172a-3p	evm.model.LG03.786	evm.model.LG02.4459	F-box/kelch-repeat protein At3g06240 OS=Arabidopsis thaliana OX=3702 GN=At3g06240 PE=2 SV=1
miRN5-5p	evm.model.LG02.2367	miR172a-3p	evm.model.LG05.1902	evm.model.LG06.4588	Scarecrow-like protein 6 OS=Arabidopsis thaliana OX=3702 GN=SCL6 PE=1 SV=1
miRN5-5p	evm.model.LG02.2374	miR172a-3p	evm.model.LG07.2134	evm.model.LG02.2355	-
miRN5-5p	evm.model.LG02.2375	miR172a-3p	evm.model.LG01.5531	evm.model.LG03.4373	Transcription factor DUO1 OS=Arabidopsis thaliana OX=3702 GN=DUO1 PE=1 SV=1
miR159a-3p	evm.model.LG02.2801	miR172a-3p	evm.model.LG04.615	evm.model.LG02.2353	F-box/kelch-repeat protein At3g06240 OS=Arabidopsis thaliana OX=3702 GN=At3g06240 PE=2 SV=1
miR168b-5p	evm.model.LG02.2801	miR172a-3p	evm.model.LG02.5111	evm.model.LG03.4650	Homeobox-leucine zipper protein ANTHOCYANINLESS 2 OS=Arabidopsis thaliana OX=3702 GN=ANL2 PE=2 SV=1
miRN5-5p	evm.model.LG02.4445	miR172a-3p	evm.model.LG01.929	evm.model.LG04.4379	Auxin response factor 16 OS=Arabidopsis thaliana OX=3702 GN=ARF16 PE=1 SV=1
miRN5-5p	evm.model.LG02.4446	miR172b-3p	evm.model.LG01.6667	evm.model.LG01.7845	Transcription factor GAMYB OS=Oryza sativa subsp. indica OX=39946 GN=GAM1 PE=2 SV=1
miRN5-5p	evm.model.LG02.4459	miR172b-3p	evm.model.LG03.786	evm.model.LG06.1473	-
miRN5-5p	evm.model.LG02.4462	miR172b-3p	evm.model.LG05.1902	evm.model.LG02.2141	Chitinase 2 OS=Tulipa saxatilis subsp. bakeri OX=110455 PE=1 SV=1
miRN5-5p	evm.model.LG02.4465	miR172b-3p	evm.model.LG07.2134	evm.model.LG05.2085	Scarecrow-like protein 15 OS=Arabidopsis thaliana OX=3702 GN=SCL15 PE=1 SV=3
miR395b-3p	evm.model.LG02.4637	miR172b-3p	evm.model.LG01.5531	evm.model.LG06.1	NAC domain-containing protein 21/22 OS=Arabidopsis thaliana OX=3702 GN=NAC021 PE=1 SV=2
miRN8-5p	evm.model.LG02.4721	miR172b-3p	evm.model.LG04.615	evm.model.LG02.2352	F-box protein CPR1 OS=Arabidopsis thaliana OX=3702 GN=CPR1 PE=1 SV=2
miRN8-5p	evm.model.LG02.4722	miR172b-3p	evm.model.LG02.5111	evm.model.LG01.752	Cyclic nucleotide-gated ion channel 2 OS=Arabidopsis thaliana OX=3702 GN=CNGC2 PE=1 SV=1
miRN8-5p	evm.model.LG02.4725	miR172b-3p	evm.model.LG01.929	evm.model.LG02.4730	Putative pentatricopeptide repeat-containing protein At1g12700, mitochondrial OS=Arabidopsis thaliana OX=3702 GN=At1g12700 PE=3 SV=1
miRN8-5p	evm.model.LG02.4727	miR172c-3p	evm.model.LG01.6667	evm.model.LG02.2350	F-box protein CPR1 OS=Arabidopsis thaliana OX=3702 GN=CPR1 PE=1 SV=2
miRN8-5p	evm.model.LG02.4730	miR172c-3p	evm.model.LG03.786	evm.model.LG02.4465	F-box protein CPR1 OS=Arabidopsis thaliana OX=3702 GN=CPR1 PE=1 SV=2
miRN8-5p	evm.model.LG02.4741	miR172c-3p	evm.model.LG05.1902	evm.model.LG02.4741	Putative pentatricopeptide repeat-containing protein At1g12700, mitochondrial OS=Arabidopsis thaliana OX=3702 GN=At1g12700 PE=3 SV=1
miRN8-5p	evm.model.LG02.4743	miR172c-3p	evm.model.LG07.2134	evm.model.LG03.165	Putative F-box/FBD/LRR-repeat protein At1g78760 OS=Arabidopsis thaliana OX=3702 GN=At1g78760 PE=4 SV=1
miRN8-5p	evm.model.LG02.4745	miR172c-3p	evm.model.LG01.5531	evm.model.LG02.4722	Pentatricopeptide repeat-containing protein At1g62930, chloroplastic OS=Arabidopsis thaliana OX=3702 GN=At1g62930 PE=2 SV=2
miRN8-5p	evm.model.LG02.4749	miR172c-3p	evm.model.LG04.615	evm.model.LG01.1696	-
miRN8-5p	evm.model.LG02.4761	miR172c-3p	evm.model.LG02.5111	evm.model.LG07.2134	APETALA2-like protein 2 OS=Oryza sativa subsp. japonica OX=39947 GN=AP2-2 PE=1 SV=1
miRN8-5p	evm.model.LG02.4773	miR172c-3p	evm.model.LG01.929	evm.model.LG07.1025	TMV resistance protein N OS=Nicotiana glutinosa OX=35889 GN=N PE=1 SV=1
miRN8-5p	evm.model.LG02.4779	miR172d-3p	evm.model.LG01.6667	evm.model.LG06.4554	Squamosa promoter-binding-like protein 7 OS=Oryza sativa subsp. indica OX=39946 GN=SPL7 PE=2 SV=1
miRN19a-5p	evm.model.LG02.491	miR172d-3p	evm.model.LG03.786	evm.model.LG04.3029	F-box/kelch-repeat protein At3g06240 OS=Arabidopsis thaliana OX=3702 GN=At3g06240 PE=2 SV=1
miRN19b-5p	evm.model.LG02.491	miR172d-3p	evm.model.LG05.1902	evm.model.LG02.4721	Pentatricopeptide repeat-containing protein At1g62930, chloroplastic OS=Arabidopsis thaliana OX=3702 GN=At1g62930 PE=2 SV=2
miR172a-3p	evm.model.LG02.5111	miR172d-3p	evm.model.LG07.2134	evm.model.LG07.2085	F-box/kelch-repeat protein At3g06240 OS=Arabidopsis thaliana OX=3702 GN=At3g06240 PE=2 SV=1
miR172b-3p	evm.model.LG02.5111	miR172d-3p	evm.model.LG01.5531	evm.model.LG05.3775	F-box/LRR-repeat protein At3g58930 OS=Arabidopsis thaliana OX=3702 GN=At3g58930 PE=2 SV=1
miR172c-3p	evm.model.LG02.5111	miR172d-3p	evm.model.LG04.615	evm.model.LG05.3773	-
miR172d-3p	evm.model.LG02.5111	miR172d-3p	evm.model.LG02.5111	evm.model.LG05.3771	-
miR160a-5p	evm.model.LG02.5200	miR172d-3p	evm.model.LG01.929	evm.model.LG03.5651	Teosinte glume architecture 1 OS=Zea mays OX=4577 GN=TGA1 PE=3 SV=1
miR160c-5p	evm.model.LG02.5200	miR395b-3p	evm.model.LG03.5389	evm.model.LG03.5389	-
miR160d-5p	evm.model.LG02.5200	miR7122a-5p	evm.model.LG07.1715	evm.model.LG03.178	-
miR171c-3p	evm.model.LG02.5698	miR7122a-5p	evm.model.LG07.1712	evm.model.LG02.4779	Putative pentatricopeptide repeat-containing protein At1g12700, mitochondrial OS=Arabidopsis thaliana OX=3702 GN=At1g12700 PE=3 SV=1
miR171e-3p	evm.model.LG02.5698	miR7122b-5p	evm.model.LG07.1715	evm.model.LG02.4773	Pentatricopeptide repeat-containing protein At1g62930, chloroplastic OS=Arabidopsis thaliana OX=3702 GN=At1g62930 PE=2 SV=2
miR390a-5p	evm.model.LG02.5850	miR7122b-5p	evm.model.LG07.1712	evm.model.LG02.4749	Putative pentatricopeptide repeat-containing protein At1g12700, mitochondrial OS=Arabidopsis thaliana OX=3702 GN=At1g12700 PE=3 SV=1
miR390c-5p	evm.model.LG02.5850	miR7122c-5p	evm.model.LG07.1715	evm.model.LG02.4745	Pentatricopeptide repeat-containing protein At1g62930, chloroplastic OS=Arabidopsis thaliana OX=3702 GN=At1g62930 PE=2 SV=2
miRN19a-5p	evm.model.LG02.6290	miR7122c-5p	evm.model.LG07.1712	evm.model.LG02.4743	Pentatricopeptide repeat-containing protein At3g22470, mitochondrial OS=Arabidopsis thaliana OX=3702 GN=At3g22470 PE=1 SV=1
miRN19b-5p	evm.model.LG02.6290	miRN19a-5p	evm.model.LG06.2304	evm.model.LG02.4727	Pentatricopeptide repeat-containing protein At3g22470, mitochondrial OS=Arabidopsis thaliana OX=3702 GN=At3g22470 PE=1 SV=1
miR171c-3p	evm.model.LG03.1086	miRN19a-5p	evm.model.LG04.4250	evm.model.LG02.4725	Putative pentatricopeptide repeat-containing protein At1g12700, mitochondrial OS=Arabidopsis thaliana OX=3702 GN=At1g12700 PE=3 SV=1
miR171e-3p	evm.model.LG03.1086	miRN19a-5p	evm.model.LG04.4251	evm.model.LG02.4446	F-box protein CPR1 OS=Arabidopsis thaliana OX=3702 GN=CPR1 PE=1 SV=2
miR164a-5p	evm.model.LG03.165	miRN19a-5p	evm.model.LG04.1507	evm.model.LG02.2361	F-box protein CPR1 OS=Arabidopsis thaliana OX=3702 GN=CPR1 PE=1 SV=2
miR164b-5p	evm.model.LG03.165	miRN19a-5p	evm.model.LG07.1144	evm.model.LG02.2023	Protein CUP-SHAPED COTYLEDON 2 OS=Arabidopsis thaliana OX=3702 GN=NAC098 PE=1 SV=1
miR164e-5p	evm.model.LG03.165	miRN19a-5p	evm.model.LG07.1199	evm.model.LG02.1919	-
miR164a-5p	evm.model.LG03.178	miRN19b-5p	evm.model.LG06.2304	evm.model.LG01.1713	Protein CUP-SHAPED COTYLEDON 2 OS=Arabidopsis thaliana OX=3702 GN=NAC098 PE=1 SV=1
miR164b-5p	evm.model.LG03.178	miRN19b-5p	evm.model.LG04.4250	evm.model.LG01.1265	Transcription factor GAMYB OS=Oryza sativa subsp. indica OX=39946 GN=GAM1 PE=2 SV=1
miR164e-5p	evm.model.LG03.178	miRN19b-5p	evm.model.LG04.4251
miR164a-5p	evm.model.LG03.243	miRN19b-5p	evm.model.LG04.1507
miR164b-5p	evm.model.LG03.243	miRN19b-5p	evm.model.LG07.1144
miR164e-5p	evm.model.LG03.243	miRN19b-5p	evm.model.LG07.1199
miR164a-5p	evm.model.LG03.2517	miRN20-3p	evm.model.LG01.6570
miR164b-5p	evm.model.LG03.2517	miRN2a-5p	evm.model.LG07.596
miR164e-5p	evm.model.LG03.2517	miRN2a-5p	evm.model.LG03.4320
miRN2a-5p	evm.model.LG03.4320	miRN2a-5p	evm.model.LG03.4628
miRN2b-5p	evm.model.LG03.4320	miRN2b-5p	evm.model.LG07.596
miR159a-3p	evm.model.LG03.4373	miRN2b-5p	evm.model.LG03.4320
miRN2a-5p	evm.model.LG03.4628	miRN2b-5p	evm.model.LG03.4628
miRN2b-5p	evm.model.LG03.4628	miRN5-5p	evm.model.LG04.4499
miR394b-5p	evm.model.LG03.4650	miRN5-5p	evm.model.LG02.2353
miR394c-5p	evm.model.LG03.4650	miRN5-5p	evm.model.LG02.4445
miR395b-3p	evm.model.LG03.5389	miRN5-5p	evm.model.LG02.4459
miR156e-5p	evm.model.LG03.5642	miRN5-5p	evm.model.LG02.2375
miR156f-5p	evm.model.LG03.5642	miRN5-5p	evm.model.LG02.2363
miR156e-5p	evm.model.LG03.5651	miRN5-5p	evm.model.LG02.2365
miR156f-5p	evm.model.LG03.5651	miRN5-5p	evm.model.LG04.3029
miR159a-3p	evm.model.LG03.662	miRN5-5p	evm.model.LG04.4497
miR172a-3p	evm.model.LG03.786	miRN5-5p	evm.model.LG07.2085
miR172b-3p	evm.model.LG03.786	miRN8-5p	evm.model.LG02.4725
miR172c-3p	evm.model.LG03.786	miRN8-5p	evm.model.LG05.3209
miR172d-3p	evm.model.LG03.786	miRN8-5p	evm.model.LG02.4773
miR393a-5p	evm.model.LG04.1183	miRN8-5p	evm.model.LG02.4749
miR393b-5p	evm.model.LG04.1183	miRN8-5p	evm.model.LG02.4743
miRN19a-5p	evm.model.LG04.1507	miRN8-5p	evm.model.LG02.4727
miRN19b-5p	evm.model.LG04.1507	miR156e-5p	evm.model.LG04.357
miRN19a-5p	evm.model.LG04.1508	miR156f-5p	evm.model.LG04.357
miRN19b-5p	evm.model.LG04.1508	miR159a-3p	evm.model.LG03.4373
miRN19a-5p	evm.model.LG04.1509	miR159a-3p	evm.model.LG07.3119
miRN19b-5p	evm.model.LG04.1509	miR159a-3p	evm.model.LG01.1265
miRN19a-5p	evm.model.LG04.1542	miR164b-5p	evm.model.LG03.178
miRN19b-5p	evm.model.LG04.1542	miR164b-5p	evm.model.LG03.178
miR394b-5p	evm.model.LG04.2726	miR164b-5p	evm.model.LG03.165
miR394c-5p	evm.model.LG04.2726	miR164b-5p	evm.model.LG05.3773
miRN5-5p	evm.model.LG04.3029	miR164b-5p	evm.model.LG05.3771
miR156e-5p	evm.model.LG04.357	miR164b-5p	evm.model.LG05.3775
miR156f-5p	evm.model.LG04.357	miR164b-5p	evm.model.LG03.243
miR393a-5p	evm.model.LG04.3772	miR393a-5p	evm.model.LG04.1183
miR393b-5p	evm.model.LG04.3772	miR393b-5p	evm.model.LG04.1183
miRN19a-5p	evm.model.LG04.4250	miR394b-5p	evm.model.LG03.4927
miRN19b-5p	evm.model.LG04.4250	miR394c-5p	evm.model.LG03.4927
miRN19a-5p	evm.model.LG04.4251	miRN14-5p	evm.model.LG02.6035
miRN19b-5p	evm.model.LG04.4251	miRN14-5p	evm.model.LG01.6280
miR160a-5p	evm.model.LG04.4379	miRN19a-5p	evm.model.LG01.5377
miR160c-5p	evm.model.LG04.4379	miRN19a-5p	evm.model.LG04.680
miR160d-5p	evm.model.LG04.4379	miRN19a-5p	evm.model.LG04.4581
miRN19a-5p	evm.model.LG04.4468	miRN19a-5p	evm.model.LG02.2141
miRN19b-5p	evm.model.LG04.4468	miRN19a-5p	evm.model.LG07.3507
miRN5-5p	evm.model.LG04.4497	miRN19a-5p	evm.model.LG04.1508
miRN5-5p	evm.model.LG04.4499	miRN19a-5p	evm.model.LG04.1509
miRN5-5p	evm.model.LG04.4560	miRN19a-5p	evm.model.LG07.3700
miRN19a-5p	evm.model.LG04.4581	miRN19b-5p	evm.model.LG01.5377
miRN19b-5p	evm.model.LG04.4581	miRN19b-5p	evm.model.LG04.680
miRN12-3p	evm.model.LG04.4770	miRN19b-5p	evm.model.LG04.4581
miR172a-3p	evm.model.LG04.615	miRN19b-5p	evm.model.LG02.2141
miR172b-3p	evm.model.LG04.615	miRN19b-5p	evm.model.LG07.3507
miR172c-3p	evm.model.LG04.615	miRN19b-5p	evm.model.LG04.1509
miR172d-3p	evm.model.LG04.615	miRN19b-5p	evm.model.LG04.1508
miRN19a-5p	evm.model.LG04.680	miRN19b-5p	evm.model.LG07.3700
miRN19b-5p	evm.model.LG04.680	miRN20-3p	evm.model.LG07.3734
miRN2a-5p	evm.model.LG04.787	miRN20-3p	evm.model.LG06.696
miRN2b-5p	evm.model.LG04.787	miRN20-3p	evm.model.LG06.697
miR159a-3p	evm.model.LG04.89	miRN2a-5p	evm.model.LG07.1025
miR172a-3p	evm.model.LG05.1902	miRN2a-5p	evm.model.LG08.1058
miR172b-3p	evm.model.LG05.1902	miRN2b-5p	evm.model.LG07.1025
miR172c-3p	evm.model.LG05.1902	miRN2b-5p	evm.model.LG08.1058
miR172d-3p	evm.model.LG05.1902	miRN5-5p	evm.model.LG02.2367
miR171c-3p	evm.model.LG05.2085	miRN8-5p	evm.model.LG02.4779
miR171e-3p	evm.model.LG05.2085	miRN8-5p	evm.model.LG01.6055
miR162-3p	evm.model.LG05.25	miRN8-5p	evm.model.LG07.3545
miRN8-5p	evm.model.LG05.3209	miR156e-5p	evm.model.LG06.4554
miR394b-5p	evm.model.LG05.3270	miR156e-5p	evm.model.LG06.290
miR394c-5p	evm.model.LG05.3270	miR156e-5p	evm.model.LG03.5651
miR156e-5p	evm.model.LG05.3271	miR156e-5p	evm.model.LG06.1473
miR156f-5p	evm.model.LG05.3271	miR156f-5p	evm.model.LG06.4554
miRN14-5p	evm.model.LG05.3563	miR156f-5p	evm.model.LG06.290
miRN14-5p	evm.model.LG05.368	miR156f-5p	evm.model.LG03.5651
miR164a-5p	evm.model.LG05.3771	miR156f-5p	evm.model.LG06.1473
miR164b-5p	evm.model.LG05.3771	miR159a-3p	evm.model.LG01.7845
miR164e-5p	evm.model.LG05.3771	miR159a-3p	evm.model.LG02.1997
miR164a-5p	evm.model.LG05.3773	miR159a-3p	evm.model.LG02.1919
miR164b-5p	evm.model.LG05.3773	miR159a-3p	evm.model.LG04.89
miR164e-5p	evm.model.LG05.3773	miR159a-3p	evm.model.LG02.3374
miR164a-5p	evm.model.LG05.3775	miR162-3p	evm.model.LG01.2203
miR164b-5p	evm.model.LG05.3775	miR164a-5p	evm.model.LG03.178
miR164e-5p	evm.model.LG05.3775	miR164a-5p	evm.model.LG03.178
miR395b-3p	evm.model.LG05.640	miR164a-5p	evm.model.LG03.165
miR395b-3p	evm.model.LG05.663	miR164a-5p	evm.model.LG05.3773
miR395b-3p	evm.model.LG05.702	miR164a-5p	evm.model.LG05.3771
miR395b-3p	evm.model.LG05.709	miR164a-5p	evm.model.LG05.3775
miR164a-5p	evm.model.LG06.1	miR164a-5p	evm.model.LG06.614
miR164b-5p	evm.model.LG06.1	miR164a-5p	evm.model.LG04.312
miR164e-5p	evm.model.LG06.1	miR164a-5p	evm.model.LG03.243
miR156e-5p	evm.model.LG06.1473	miR164a-5p	evm.model.LG01.3896
miR156f-5p	evm.model.LG06.1473	miR164b-5p	evm.model.LG02.5881
miR159a-3p	evm.model.LG06.2136	miR164e-5p	evm.model.LG03.178
miRN19a-5p	evm.model.LG06.2265	miR164e-5p	evm.model.LG03.178
miRN19b-5p	evm.model.LG06.2265	miR164e-5p	evm.model.LG03.165
miRN19a-5p	evm.model.LG06.2304	miR164e-5p	evm.model.LG05.3773
miRN19b-5p	evm.model.LG06.2304	miR164e-5p	evm.model.LG05.3771
miRN19a-5p	evm.model.LG06.2426	miR164e-5p	evm.model.LG05.3775
miRN19b-5p	evm.model.LG06.2426	miR164e-5p	evm.model.LG06.614
miRN19a-5p	evm.model.LG06.2427	miR164e-5p	evm.model.LG04.312
miRN19b-5p	evm.model.LG06.2427	miR164e-5p	evm.model.LG03.243
miRN19a-5p	evm.model.LG06.2461	miR164e-5p	evm.model.LG01.3896
miRN19b-5p	evm.model.LG06.2461	miR168b-5p	evm.model.LG01.8136
miR156e-5p	evm.model.LG06.290	miR168b-5p	evm.model.LG01.6908
miR156f-5p	evm.model.LG06.290	miR172a-3p	evm.model.LG02.1923
miRN5-5p	evm.model.LG06.3069	miR172b-3p	evm.model.LG02.1923
miRN14-5p	evm.model.LG06.3352	miR172c-3p	evm.model.LG02.1923
miR156e-5p	evm.model.LG06.4554	miR172d-3p	evm.model.LG02.1923
miR156f-5p	evm.model.LG06.4554	miR319e-3p	evm.model.LG01.7845
miR171c-3p	evm.model.LG06.4588	miR319e-3p	evm.model.LG02.3374
miR171e-3p	evm.model.LG06.4588	miR393a-5p	evm.model.LG07.185
miR164a-5p	evm.model.LG06.509	miR393a-5p	evm.model.LG04.958
miR164b-5p	evm.model.LG06.509	miR393b-5p	evm.model.LG07.185
miR164e-5p	evm.model.LG06.509	miR393b-5p	evm.model.LG04.958
miRN20-3p	evm.model.LG06.696	miR394b-5p	evm.model.LG03.4650
miRN20-3p	evm.model.LG06.697	miR394b-5p	evm.model.LG05.2581
miR394b-5p	evm.model.LG06.854	miR394c-5p	evm.model.LG03.4650
miR394c-5p	evm.model.LG06.854	miR394c-5p	evm.model.LG05.2581
miRN2a-5p	evm.model.LG07.1025	miRN12-3p	evm.model.LG01.6335
miRN2b-5p	evm.model.LG07.1025	miRN14-5p	evm.model.LG05.368
miRN19a-5p	evm.model.LG07.1144	miRN14-5p	evm.model.LG07.1124
miRN19b-5p	evm.model.LG07.1144	miRN14-5p	evm.model.LG02.3510
miRN19a-5p	evm.model.LG07.1185	miRN14-5p	evm.model.LG02.2394
miRN19b-5p	evm.model.LG07.1185	miRN19a-5p	evm.model.LG01.4718
miR393a-5p	evm.model.LG07.1621	miRN19a-5p	evm.model.LG02.491
miR393b-5p	evm.model.LG07.1621	miRN19a-5p	evm.model.LG08.216
miR7122a-5p	evm.model.LG07.1712	miRN19a-5p	evm.model.LG06.2265
miR7122b-5p	evm.model.LG07.1712	miRN19a-5p	evm.model.LG06.2427
miR7122c-5p	evm.model.LG07.1712	miRN19a-5p	evm.model.LG07.2785
miR7122a-5p	evm.model.LG07.1715	miRN19a-5p	evm.model.LG08.384
miR7122b-5p	evm.model.LG07.1715	miRN19a-5p	evm.model.LG01.8768
miR7122c-5p	evm.model.LG07.1715	miRN19a-5p	evm.model.LG06.2426
miRN5-5p	evm.model.LG07.2085	miRN19a-5p	evm.model.LG03.4453
miR172a-3p	evm.model.LG07.2134	miRN19a-5p	evm.model.LG01.8006
miR172b-3p	evm.model.LG07.2134	miRN19a-5p	evm.model.LG04.2829
miR172c-3p	evm.model.LG07.2134	miRN19a-5p	evm.model.LG03.385
miR172d-3p	evm.model.LG07.2134	miRN19b-5p	evm.model.LG01.4718
miRN19a-5p	evm.model.LG07.2785	miRN19b-5p	evm.model.LG02.491
miRN19b-5p	evm.model.LG07.2785	miRN19b-5p	evm.model.LG08.216
miRN19a-5p	evm.model.LG07.2793	miRN19b-5p	evm.model.LG06.2265
miRN19b-5p	evm.model.LG07.2793	miRN19b-5p	evm.model.LG06.2427
miRN20-3p	evm.model.LG07.3734	miRN19b-5p	evm.model.LG07.2785
miR164a-5p	evm.model.LG07.3896	miRN19b-5p	evm.model.LG01.8768
miR164b-5p	evm.model.LG07.3896	miRN19b-5p	evm.model.LG08.384
miR164e-5p	evm.model.LG07.3896	miRN19b-5p	evm.model.LG06.2426
miR395b-3p	evm.model.LG07.4075	miRN19b-5p	evm.model.LG03.4453
miR319e-3p	evm.model.LG07.435	miRN19b-5p	evm.model.LG01.8006
miRN2a-5p	evm.model.LG07.596	miRN19b-5p	evm.model.LG04.2829
miRN2b-5p	evm.model.LG07.596	miRN19b-5p	evm.model.LG03.385
miRN2a-5p	evm.model.LG08.1058	miRN26-3p	evm.model.LG01.752
miRN2b-5p	evm.model.LG08.1058	miRN2a-5p	evm.model.LG08.1808
miR160a-5p	evm.model.LG08.1353	miRN2a-5p	evm.model.Contig1.108
miR160c-5p	evm.model.LG08.1353	miRN2a-5p	evm.model.LG08.1803
miR160d-5p	evm.model.LG08.1353	miRN2a-5p	evm.model.LG06.2413
miRN5-5p	evm.model.LG08.1614	miRN2a-5p	evm.model.LG08.1071
miRN14-5p	evm.model.LG08.1780	miRN2a-5p	evm.model.LG08.1113
miRN2a-5p	evm.model.LG08.1803	miRN2a-5p	evm.model.LG04.787
miRN2b-5p	evm.model.LG08.1803	miRN2b-5p	evm.model.LG08.1808
miRN2a-5p	evm.model.LG08.1808	miRN2b-5p	evm.model.LG08.1803
miRN2b-5p	evm.model.LG08.1808	miRN2b-5p	evm.model.Contig1.108
miRN19a-5p	evm.model.LG08.216	miRN2b-5p	evm.model.LG06.2413
miRN19b-5p	evm.model.LG08.216	miRN2b-5p	evm.model.LG08.1071
miRN19a-5p	evm.model.LG08.384	miRN2b-5p	evm.model.LG08.1113
miRN19b-5p	evm.model.LG08.384	miRN2b-5p	evm.model.LG04.787
miRN2a-5p	evm.model.LG08.996	miRN5-5p	evm.model.LG08.1614
miRN2b-5p	evm.model.LG08.996	miRN5-5p	evm.model.LG04.4560
		miRN5-5p	evm.model.LG02.4446
		miRN5-5p	evm.model.LG02.4465
		miRN5-5p	evm.model.LG07.1700
		miRN5-5p	evm.model.LG04.3974
		miRN8-5p	evm.model.LG01.7518
		miRN8-5p	evm.model.LG06.1369
		miRN8-5p	evm.model.LG01.5872
		miRN8-5p	evm.model.LG07.3696
