# Supplementary material for: Identification of miRNAs and their targets in two Taraxacum species with contrasting rubber-producing ability
Source: Front Plant Sci. 2023 Nov 8;14:1287318. doi: 10.3389/fpls.2023.1287318 (PMC10663287; doi:10.3389/fpls.2023.1287318)
Supplement: Supplementary file 5 [file Table_4.xlsx]

## Sheet: Sheet1
Supplementary Table 4. GO enrichment analysis of differentially expressed miRNA targets.
GO ID	Description	out (57)	All (10289)	pvalue	p.adjust	Genes
GO:0050794	regulation of cellular process	37	1323	6.29e-20	4.97e-18	evm.model.Contig1.108;evm.model.LG01.1713;evm.model.LG01.2348;evm.model.LG01.4060;evm.model.LG01.5531;evm.model.LG01.5621;evm.model.LG01.5728;evm.model.LG01.6149;evm.model.LG01.6667;evm.model.LG02.2023;evm.model.LG02.5111;evm.model.LG02.5200;evm.model.LG03.243;evm.model.LG03.2517;evm.model.LG03.4320;evm.model.LG03.4628;evm.model.LG03.4650;evm.model.LG03.786;evm.model.LG04.4379;evm.model.LG04.615;…
GO:0050789	regulation of biological process	37	1369	2.05e-19	8.11e-18	evm.model.Contig1.108;evm.model.LG01.1713;evm.model.LG01.2348;evm.model.LG01.4060;evm.model.LG01.5531;evm.model.LG01.5621;evm.model.LG01.5728;evm.model.LG01.6149;evm.model.LG01.6667;evm.model.LG02.2023;evm.model.LG02.5111;evm.model.LG02.5200;evm.model.LG03.243;evm.model.LG03.2517;evm.model.LG03.4320;evm.model.LG03.4628;evm.model.LG03.4650;evm.model.LG03.786;evm.model.LG04.4379;evm.model.LG04.615;…
GO:0065007	biological regulation	37	1422	7.59e-19	2e-17	evm.model.Contig1.108;evm.model.LG01.1713;evm.model.LG01.2348;evm.model.LG01.4060;evm.model.LG01.5531;evm.model.LG01.5621;evm.model.LG01.5728;evm.model.LG01.6149;evm.model.LG01.6667;evm.model.LG02.2023;evm.model.LG02.5111;evm.model.LG02.5200;evm.model.LG03.243;evm.model.LG03.2517;evm.model.LG03.4320;evm.model.LG03.4628;evm.model.LG03.4650;evm.model.LG03.786;evm.model.LG04.4379;evm.model.LG04.615;…
GO:0006355	regulation of transcription, DNA-templated	25	884	1.12e-12	9.95e-12	evm.model.LG01.1713;evm.model.LG01.2348;evm.model.LG01.4060;evm.model.LG01.5531;evm.model.LG01.5621;evm.model.LG01.5728;evm.model.LG01.6149;evm.model.LG01.6667;evm.model.LG02.2023;evm.model.LG02.5111;evm.model.LG02.5200;evm.model.LG03.243;evm.model.LG03.2517;evm.model.LG03.4650;evm.model.LG03.786;evm.model.LG04.4379;evm.model.LG04.615;evm.model.LG05.1902;evm.model.LG06.1;evm.model.LG06.509;evm.mo…
GO:1903506	regulation of nucleic acid-templated transcription	25	884	1.12e-12	9.95e-12	evm.model.LG01.1713;evm.model.LG01.2348;evm.model.LG01.4060;evm.model.LG01.5531;evm.model.LG01.5621;evm.model.LG01.5728;evm.model.LG01.6149;evm.model.LG01.6667;evm.model.LG02.2023;evm.model.LG02.5111;evm.model.LG02.5200;evm.model.LG03.243;evm.model.LG03.2517;evm.model.LG03.4650;evm.model.LG03.786;evm.model.LG04.4379;evm.model.LG04.615;evm.model.LG05.1902;evm.model.LG06.1;evm.model.LG06.509;evm.mo…
GO:2001141	regulation of RNA biosynthetic process	25	884	1.12e-12	9.95e-12	evm.model.LG01.1713;evm.model.LG01.2348;evm.model.LG01.4060;evm.model.LG01.5531;evm.model.LG01.5621;evm.model.LG01.5728;evm.model.LG01.6149;evm.model.LG01.6667;evm.model.LG02.2023;evm.model.LG02.5111;evm.model.LG02.5200;evm.model.LG03.243;evm.model.LG03.2517;evm.model.LG03.4650;evm.model.LG03.786;evm.model.LG04.4379;evm.model.LG04.615;evm.model.LG05.1902;evm.model.LG06.1;evm.model.LG06.509;evm.mo…
GO:0051252	regulation of RNA metabolic process	25	887	1.2e-12	9.95e-12	evm.model.LG01.1713;evm.model.LG01.2348;evm.model.LG01.4060;evm.model.LG01.5531;evm.model.LG01.5621;evm.model.LG01.5728;evm.model.LG01.6149;evm.model.LG01.6667;evm.model.LG02.2023;evm.model.LG02.5111;evm.model.LG02.5200;evm.model.LG03.243;evm.model.LG03.2517;evm.model.LG03.4650;evm.model.LG03.786;evm.model.LG04.4379;evm.model.LG04.615;evm.model.LG05.1902;evm.model.LG06.1;evm.model.LG06.509;evm.mo…
GO:0009889	regulation of biosynthetic process	25	895	1.47e-12	9.95e-12	evm.model.LG01.1713;evm.model.LG01.2348;evm.model.LG01.4060;evm.model.LG01.5531;evm.model.LG01.5621;evm.model.LG01.5728;evm.model.LG01.6149;evm.model.LG01.6667;evm.model.LG02.2023;evm.model.LG02.5111;evm.model.LG02.5200;evm.model.LG03.243;evm.model.LG03.2517;evm.model.LG03.4650;evm.model.LG03.786;evm.model.LG04.4379;evm.model.LG04.615;evm.model.LG05.1902;evm.model.LG06.1;evm.model.LG06.509;evm.mo…
GO:0010556	regulation of macromolecule biosynthetic process	25	895	1.47e-12	9.95e-12	evm.model.LG01.1713;evm.model.LG01.2348;evm.model.LG01.4060;evm.model.LG01.5531;evm.model.LG01.5621;evm.model.LG01.5728;evm.model.LG01.6149;evm.model.LG01.6667;evm.model.LG02.2023;evm.model.LG02.5111;evm.model.LG02.5200;evm.model.LG03.243;evm.model.LG03.2517;evm.model.LG03.4650;evm.model.LG03.786;evm.model.LG04.4379;evm.model.LG04.615;evm.model.LG05.1902;evm.model.LG06.1;evm.model.LG06.509;evm.mo…
GO:0031326	regulation of cellular biosynthetic process	25	895	1.47e-12	9.95e-12	evm.model.LG01.1713;evm.model.LG01.2348;evm.model.LG01.4060;evm.model.LG01.5531;evm.model.LG01.5621;evm.model.LG01.5728;evm.model.LG01.6149;evm.model.LG01.6667;evm.model.LG02.2023;evm.model.LG02.5111;evm.model.LG02.5200;evm.model.LG03.243;evm.model.LG03.2517;evm.model.LG03.4650;evm.model.LG03.786;evm.model.LG04.4379;evm.model.LG04.615;evm.model.LG05.1902;evm.model.LG06.1;evm.model.LG06.509;evm.mo…
GO:2000112	regulation of cellular macromolecule biosynthetic process	25	895	1.47e-12	9.95e-12	evm.model.LG01.1713;evm.model.LG01.2348;evm.model.LG01.4060;evm.model.LG01.5531;evm.model.LG01.5621;evm.model.LG01.5728;evm.model.LG01.6149;evm.model.LG01.6667;evm.model.LG02.2023;evm.model.LG02.5111;evm.model.LG02.5200;evm.model.LG03.243;evm.model.LG03.2517;evm.model.LG03.4650;evm.model.LG03.786;evm.model.LG04.4379;evm.model.LG04.615;evm.model.LG05.1902;evm.model.LG06.1;evm.model.LG06.509;evm.mo…
GO:0019219	regulation of nucleobase-containing compound metabolic process	25	896	1.51e-12	9.95e-12	evm.model.LG01.1713;evm.model.LG01.2348;evm.model.LG01.4060;evm.model.LG01.5531;evm.model.LG01.5621;evm.model.LG01.5728;evm.model.LG01.6149;evm.model.LG01.6667;evm.model.LG02.2023;evm.model.LG02.5111;evm.model.LG02.5200;evm.model.LG03.243;evm.model.LG03.2517;evm.model.LG03.4650;evm.model.LG03.786;evm.model.LG04.4379;evm.model.LG04.615;evm.model.LG05.1902;evm.model.LG06.1;evm.model.LG06.509;evm.mo…
GO:0051171	regulation of nitrogen compound metabolic process	25	903	1.8e-12	1.09e-11	evm.model.LG01.1713;evm.model.LG01.2348;evm.model.LG01.4060;evm.model.LG01.5531;evm.model.LG01.5621;evm.model.LG01.5728;evm.model.LG01.6149;evm.model.LG01.6667;evm.model.LG02.2023;evm.model.LG02.5111;evm.model.LG02.5200;evm.model.LG03.243;evm.model.LG03.2517;evm.model.LG03.4650;evm.model.LG03.786;evm.model.LG04.4379;evm.model.LG04.615;evm.model.LG05.1902;evm.model.LG06.1;evm.model.LG06.509;evm.mo…
GO:0010468	regulation of gene expression	25	911	2.19e-12	1.24e-11	evm.model.LG01.1713;evm.model.LG01.2348;evm.model.LG01.4060;evm.model.LG01.5531;evm.model.LG01.5621;evm.model.LG01.5728;evm.model.LG01.6149;evm.model.LG01.6667;evm.model.LG02.2023;evm.model.LG02.5111;evm.model.LG02.5200;evm.model.LG03.243;evm.model.LG03.2517;evm.model.LG03.4650;evm.model.LG03.786;evm.model.LG04.4379;evm.model.LG04.615;evm.model.LG05.1902;evm.model.LG06.1;evm.model.LG06.509;evm.mo…
GO:0080090	regulation of primary metabolic process	25	938	4.2e-12	2.21e-11	evm.model.LG01.1713;evm.model.LG01.2348;evm.model.LG01.4060;evm.model.LG01.5531;evm.model.LG01.5621;evm.model.LG01.5728;evm.model.LG01.6149;evm.model.LG01.6667;evm.model.LG02.2023;evm.model.LG02.5111;evm.model.LG02.5200;evm.model.LG03.243;evm.model.LG03.2517;evm.model.LG03.4650;evm.model.LG03.786;evm.model.LG04.4379;evm.model.LG04.615;evm.model.LG05.1902;evm.model.LG06.1;evm.model.LG06.509;evm.mo…
GO:0031323	regulation of cellular metabolic process	25	943	4.73e-12	2.34e-11	evm.model.LG01.1713;evm.model.LG01.2348;evm.model.LG01.4060;evm.model.LG01.5531;evm.model.LG01.5621;evm.model.LG01.5728;evm.model.LG01.6149;evm.model.LG01.6667;evm.model.LG02.2023;evm.model.LG02.5111;evm.model.LG02.5200;evm.model.LG03.243;evm.model.LG03.2517;evm.model.LG03.4650;evm.model.LG03.786;evm.model.LG04.4379;evm.model.LG04.615;evm.model.LG05.1902;evm.model.LG06.1;evm.model.LG06.509;evm.mo…
GO:0060255	regulation of macromolecule metabolic process	25	957	6.57e-12	3.05e-11	evm.model.LG01.1713;evm.model.LG01.2348;evm.model.LG01.4060;evm.model.LG01.5531;evm.model.LG01.5621;evm.model.LG01.5728;evm.model.LG01.6149;evm.model.LG01.6667;evm.model.LG02.2023;evm.model.LG02.5111;evm.model.LG02.5200;evm.model.LG03.243;evm.model.LG03.2517;evm.model.LG03.4650;evm.model.LG03.786;evm.model.LG04.4379;evm.model.LG04.615;evm.model.LG05.1902;evm.model.LG06.1;evm.model.LG06.509;evm.mo…
GO:0019222	regulation of metabolic process	25	974	9.7e-12	4.26e-11	evm.model.LG01.1713;evm.model.LG01.2348;evm.model.LG01.4060;evm.model.LG01.5531;evm.model.LG01.5621;evm.model.LG01.5728;evm.model.LG01.6149;evm.model.LG01.6667;evm.model.LG02.2023;evm.model.LG02.5111;evm.model.LG02.5200;evm.model.LG03.243;evm.model.LG03.2517;evm.model.LG03.4650;evm.model.LG03.786;evm.model.LG04.4379;evm.model.LG04.615;evm.model.LG05.1902;evm.model.LG06.1;evm.model.LG06.509;evm.mo…
GO:0006351	transcription, DNA-templated	25	1012	2.26e-11	8.86e-11	evm.model.LG01.1713;evm.model.LG01.2348;evm.model.LG01.4060;evm.model.LG01.5531;evm.model.LG01.5621;evm.model.LG01.5728;evm.model.LG01.6149;evm.model.LG01.6667;evm.model.LG02.2023;evm.model.LG02.5111;evm.model.LG02.5200;evm.model.LG03.243;evm.model.LG03.2517;evm.model.LG03.4650;evm.model.LG03.786;evm.model.LG04.4379;evm.model.LG04.615;evm.model.LG05.1902;evm.model.LG06.1;evm.model.LG06.509;evm.mo…
GO:0097659	nucleic acid-templated transcription	25	1012	2.26e-11	8.86e-11	evm.model.LG01.1713;evm.model.LG01.2348;evm.model.LG01.4060;evm.model.LG01.5531;evm.model.LG01.5621;evm.model.LG01.5728;evm.model.LG01.6149;evm.model.LG01.6667;evm.model.LG02.2023;evm.model.LG02.5111;evm.model.LG02.5200;evm.model.LG03.243;evm.model.LG03.2517;evm.model.LG03.4650;evm.model.LG03.786;evm.model.LG04.4379;evm.model.LG04.615;evm.model.LG05.1902;evm.model.LG06.1;evm.model.LG06.509;evm.mo…
GO:0032774	RNA biosynthetic process	25	1014	2.36e-11	8.86e-11	evm.model.LG01.1713;evm.model.LG01.2348;evm.model.LG01.4060;evm.model.LG01.5531;evm.model.LG01.5621;evm.model.LG01.5728;evm.model.LG01.6149;evm.model.LG01.6667;evm.model.LG02.2023;evm.model.LG02.5111;evm.model.LG02.5200;evm.model.LG03.243;evm.model.LG03.2517;evm.model.LG03.4650;evm.model.LG03.786;evm.model.LG04.4379;evm.model.LG04.615;evm.model.LG05.1902;evm.model.LG06.1;evm.model.LG06.509;evm.mo…
GO:0034654	nucleobase-containing compound biosynthetic process	25	1147	3.42e-10	1.23e-09	evm.model.LG01.1713;evm.model.LG01.2348;evm.model.LG01.4060;evm.model.LG01.5531;evm.model.LG01.5621;evm.model.LG01.5728;evm.model.LG01.6149;evm.model.LG01.6667;evm.model.LG02.2023;evm.model.LG02.5111;evm.model.LG02.5200;evm.model.LG03.243;evm.model.LG03.2517;evm.model.LG03.4650;evm.model.LG03.786;evm.model.LG04.4379;evm.model.LG04.615;evm.model.LG05.1902;evm.model.LG06.1;evm.model.LG06.509;evm.mo…
GO:0044260	cellular macromolecule metabolic process	45	3937	3.88e-10	1.33e-09	evm.model.LG01.1713;evm.model.LG01.2348;evm.model.LG01.4060;evm.model.LG01.4718;evm.model.LG01.5377;evm.model.LG01.5531;evm.model.LG01.5621;evm.model.LG01.5728;evm.model.LG01.6149;evm.model.LG01.6667;evm.model.LG01.8768;evm.model.LG02.2023;evm.model.LG02.491;evm.model.LG02.5111;evm.model.LG02.5200;evm.model.LG03.243;evm.model.LG03.2517;evm.model.LG03.4650;evm.model.LG03.786;evm.model.LG04.1507;ev…
GO:0019438	aromatic compound biosynthetic process	25	1260	2.51e-09	8.27e-09	evm.model.LG01.1713;evm.model.LG01.2348;evm.model.LG01.4060;evm.model.LG01.5531;evm.model.LG01.5621;evm.model.LG01.5728;evm.model.LG01.6149;evm.model.LG01.6667;evm.model.LG02.2023;evm.model.LG02.5111;evm.model.LG02.5200;evm.model.LG03.243;evm.model.LG03.2517;evm.model.LG03.4650;evm.model.LG03.786;evm.model.LG04.4379;evm.model.LG04.615;evm.model.LG05.1902;evm.model.LG06.1;evm.model.LG06.509;evm.mo…
GO:0018130	heterocycle biosynthetic process	25	1279	3.44e-09	1.09e-08	evm.model.LG01.1713;evm.model.LG01.2348;evm.model.LG01.4060;evm.model.LG01.5531;evm.model.LG01.5621;evm.model.LG01.5728;evm.model.LG01.6149;evm.model.LG01.6667;evm.model.LG02.2023;evm.model.LG02.5111;evm.model.LG02.5200;evm.model.LG03.243;evm.model.LG03.2517;evm.model.LG03.4650;evm.model.LG03.786;evm.model.LG04.4379;evm.model.LG04.615;evm.model.LG05.1902;evm.model.LG06.1;evm.model.LG06.509;evm.mo…
GO:1901362	organic cyclic compound biosynthetic process	25	1316	6.23e-09	1.89e-08	evm.model.LG01.1713;evm.model.LG01.2348;evm.model.LG01.4060;evm.model.LG01.5531;evm.model.LG01.5621;evm.model.LG01.5728;evm.model.LG01.6149;evm.model.LG01.6667;evm.model.LG02.2023;evm.model.LG02.5111;evm.model.LG02.5200;evm.model.LG03.243;evm.model.LG03.2517;evm.model.LG03.4650;evm.model.LG03.786;evm.model.LG04.4379;evm.model.LG04.615;evm.model.LG05.1902;evm.model.LG06.1;evm.model.LG06.509;evm.mo…
GO:0009987	cellular process	56	7099	1.63e-08	4.76e-08	evm.model.Contig1.108;evm.model.LG01.1713;evm.model.LG01.2348;evm.model.LG01.4060;evm.model.LG01.4718;evm.model.LG01.5377;evm.model.LG01.5531;evm.model.LG01.5621;evm.model.LG01.5728;evm.model.LG01.6149;evm.model.LG01.6667;evm.model.LG01.752;evm.model.LG01.8768;evm.model.LG02.2023;evm.model.LG02.491;evm.model.LG02.5111;evm.model.LG02.5200;evm.model.LG03.243;evm.model.LG03.2517;evm.model.LG03.4320;…
GO:0016070	RNA metabolic process	25	1444	4.19e-08	1.18e-07	evm.model.LG01.1713;evm.model.LG01.2348;evm.model.LG01.4060;evm.model.LG01.5531;evm.model.LG01.5621;evm.model.LG01.5728;evm.model.LG01.6149;evm.model.LG01.6667;evm.model.LG02.2023;evm.model.LG02.5111;evm.model.LG02.5200;evm.model.LG03.243;evm.model.LG03.2517;evm.model.LG03.4650;evm.model.LG03.786;evm.model.LG04.4379;evm.model.LG04.615;evm.model.LG05.1902;evm.model.LG06.1;evm.model.LG06.509;evm.mo…
GO:0043170	macromolecule metabolic process	45	4477	4.69e-08	1.28e-07	evm.model.LG01.1713;evm.model.LG01.2348;evm.model.LG01.4060;evm.model.LG01.4718;evm.model.LG01.5377;evm.model.LG01.5531;evm.model.LG01.5621;evm.model.LG01.5728;evm.model.LG01.6149;evm.model.LG01.6667;evm.model.LG01.8768;evm.model.LG02.2023;evm.model.LG02.491;evm.model.LG02.5111;evm.model.LG02.5200;evm.model.LG03.243;evm.model.LG03.2517;evm.model.LG03.4650;evm.model.LG03.786;evm.model.LG04.1507;ev…
GO:0007165	signal transduction	12	331	1.94e-07	4.78e-07	evm.model.Contig1.108;evm.model.LG03.4320;evm.model.LG03.4628;evm.model.LG04.787;evm.model.LG07.1025;evm.model.LG07.1144;evm.model.LG07.2785;evm.model.LG07.596;evm.model.LG08.1058;evm.model.LG08.1803;evm.model.LG08.1808;evm.model.LG08.996
GO:0023052	signaling	12	331	1.94e-07	4.78e-07	evm.model.Contig1.108;evm.model.LG03.4320;evm.model.LG03.4628;evm.model.LG04.787;evm.model.LG07.1025;evm.model.LG07.1144;evm.model.LG07.2785;evm.model.LG07.596;evm.model.LG08.1058;evm.model.LG08.1803;evm.model.LG08.1808;evm.model.LG08.996
GO:0044700	single organism signaling	12	331	1.94e-07	4.78e-07	evm.model.Contig1.108;evm.model.LG03.4320;evm.model.LG03.4628;evm.model.LG04.787;evm.model.LG07.1025;evm.model.LG07.1144;evm.model.LG07.2785;evm.model.LG07.596;evm.model.LG08.1058;evm.model.LG08.1803;evm.model.LG08.1808;evm.model.LG08.996
GO:0050896	response to stimulus	17	768	4.73e-07	1.13e-06	evm.model.Contig1.108;evm.model.LG01.2348;evm.model.LG01.5621;evm.model.LG01.6149;evm.model.LG02.5200;evm.model.LG03.4320;evm.model.LG03.4628;evm.model.LG04.4379;evm.model.LG04.787;evm.model.LG07.1025;evm.model.LG07.1144;evm.model.LG07.2785;evm.model.LG07.596;evm.model.LG08.1058;evm.model.LG08.1803;evm.model.LG08.1808;evm.model.LG08.996
GO:0090304	nucleic acid metabolic process	25	1653	6.11e-07	1.42e-06	evm.model.LG01.1713;evm.model.LG01.2348;evm.model.LG01.4060;evm.model.LG01.5531;evm.model.LG01.5621;evm.model.LG01.5728;evm.model.LG01.6149;evm.model.LG01.6667;evm.model.LG02.2023;evm.model.LG02.5111;evm.model.LG02.5200;evm.model.LG03.243;evm.model.LG03.2517;evm.model.LG03.4650;evm.model.LG03.786;evm.model.LG04.4379;evm.model.LG04.615;evm.model.LG05.1902;evm.model.LG06.1;evm.model.LG06.509;evm.mo…
GO:0009059	macromolecule biosynthetic process	25	1741	1.66e-06	3.63e-06	evm.model.LG01.1713;evm.model.LG01.2348;evm.model.LG01.4060;evm.model.LG01.5531;evm.model.LG01.5621;evm.model.LG01.5728;evm.model.LG01.6149;evm.model.LG01.6667;evm.model.LG02.2023;evm.model.LG02.5111;evm.model.LG02.5200;evm.model.LG03.243;evm.model.LG03.2517;evm.model.LG03.4650;evm.model.LG03.786;evm.model.LG04.4379;evm.model.LG04.615;evm.model.LG05.1902;evm.model.LG06.1;evm.model.LG06.509;evm.mo…
GO:0034645	cellular macromolecule biosynthetic process	25	1741	1.66e-06	3.63e-06	evm.model.LG01.1713;evm.model.LG01.2348;evm.model.LG01.4060;evm.model.LG01.5531;evm.model.LG01.5621;evm.model.LG01.5728;evm.model.LG01.6149;evm.model.LG01.6667;evm.model.LG02.2023;evm.model.LG02.5111;evm.model.LG02.5200;evm.model.LG03.243;evm.model.LG03.2517;evm.model.LG03.4650;evm.model.LG03.786;evm.model.LG04.4379;evm.model.LG04.615;evm.model.LG05.1902;evm.model.LG06.1;evm.model.LG06.509;evm.mo…
GO:0044271	cellular nitrogen compound biosynthetic process	25	1755	1.93e-06	4.12e-06	evm.model.LG01.1713;evm.model.LG01.2348;evm.model.LG01.4060;evm.model.LG01.5531;evm.model.LG01.5621;evm.model.LG01.5728;evm.model.LG01.6149;evm.model.LG01.6667;evm.model.LG02.2023;evm.model.LG02.5111;evm.model.LG02.5200;evm.model.LG03.243;evm.model.LG03.2517;evm.model.LG03.4650;evm.model.LG03.786;evm.model.LG04.4379;evm.model.LG04.615;evm.model.LG05.1902;evm.model.LG06.1;evm.model.LG06.509;evm.mo…
GO:0007154	cell communication	12	435	3.51e-06	7.29e-06	evm.model.Contig1.108;evm.model.LG03.4320;evm.model.LG03.4628;evm.model.LG04.787;evm.model.LG07.1025;evm.model.LG07.1144;evm.model.LG07.2785;evm.model.LG07.596;evm.model.LG08.1058;evm.model.LG08.1803;evm.model.LG08.1808;evm.model.LG08.996
GO:0010467	gene expression	25	1848	5.08e-06	1.03e-05	evm.model.LG01.1713;evm.model.LG01.2348;evm.model.LG01.4060;evm.model.LG01.5531;evm.model.LG01.5621;evm.model.LG01.5728;evm.model.LG01.6149;evm.model.LG01.6667;evm.model.LG02.2023;evm.model.LG02.5111;evm.model.LG02.5200;evm.model.LG03.243;evm.model.LG03.2517;evm.model.LG03.4650;evm.model.LG03.786;evm.model.LG04.4379;evm.model.LG04.615;evm.model.LG05.1902;evm.model.LG06.1;evm.model.LG06.509;evm.mo…
GO:0051716	cellular response to stimulus	12	458	5.96e-06	1.18e-05	evm.model.Contig1.108;evm.model.LG03.4320;evm.model.LG03.4628;evm.model.LG04.787;evm.model.LG07.1025;evm.model.LG07.1144;evm.model.LG07.2785;evm.model.LG07.596;evm.model.LG08.1058;evm.model.LG08.1803;evm.model.LG08.1808;evm.model.LG08.996
GO:0044237	cellular metabolic process	45	5254	1.26e-05	2.43e-05	evm.model.LG01.1713;evm.model.LG01.2348;evm.model.LG01.4060;evm.model.LG01.4718;evm.model.LG01.5377;evm.model.LG01.5531;evm.model.LG01.5621;evm.model.LG01.5728;evm.model.LG01.6149;evm.model.LG01.6667;evm.model.LG01.8768;evm.model.LG02.2023;evm.model.LG02.491;evm.model.LG02.5111;evm.model.LG02.5200;evm.model.LG03.243;evm.model.LG03.2517;evm.model.LG03.4650;evm.model.LG03.786;evm.model.LG04.1507;ev…
GO:0006468	protein phosphorylation	20	1315	1.3e-05	2.44e-05	evm.model.LG01.4718;evm.model.LG01.5377;evm.model.LG01.8768;evm.model.LG02.491;evm.model.LG04.1507;evm.model.LG04.1508;evm.model.LG04.1509;evm.model.LG04.4250;evm.model.LG04.4251;evm.model.LG04.4581;evm.model.LG04.680;evm.model.LG06.2265;evm.model.LG06.2304;evm.model.LG06.2426;evm.model.LG06.2427;evm.model.LG06.2461;evm.model.LG07.1144;evm.model.LG07.2785;evm.model.LG08.216;evm.model.LG08.384
GO:0006139	nucleobase-containing compound metabolic process	25	1983	1.84e-05	3.39e-05	evm.model.LG01.1713;evm.model.LG01.2348;evm.model.LG01.4060;evm.model.LG01.5531;evm.model.LG01.5621;evm.model.LG01.5728;evm.model.LG01.6149;evm.model.LG01.6667;evm.model.LG02.2023;evm.model.LG02.5111;evm.model.LG02.5200;evm.model.LG03.243;evm.model.LG03.2517;evm.model.LG03.4650;evm.model.LG03.786;evm.model.LG04.4379;evm.model.LG04.615;evm.model.LG05.1902;evm.model.LG06.1;evm.model.LG06.509;evm.mo…
GO:0016310	phosphorylation	20	1440	4.99e-05	8.95e-05	evm.model.LG01.4718;evm.model.LG01.5377;evm.model.LG01.8768;evm.model.LG02.491;evm.model.LG04.1507;evm.model.LG04.1508;evm.model.LG04.1509;evm.model.LG04.4250;evm.model.LG04.4251;evm.model.LG04.4581;evm.model.LG04.680;evm.model.LG06.2265;evm.model.LG06.2304;evm.model.LG06.2426;evm.model.LG06.2427;evm.model.LG06.2461;evm.model.LG07.1144;evm.model.LG07.2785;evm.model.LG08.216;evm.model.LG08.384
GO:0046483	heterocycle metabolic process	25	2128	6.41e-05	0.000112583	evm.model.LG01.1713;evm.model.LG01.2348;evm.model.LG01.4060;evm.model.LG01.5531;evm.model.LG01.5621;evm.model.LG01.5728;evm.model.LG01.6149;evm.model.LG01.6667;evm.model.LG02.2023;evm.model.LG02.5111;evm.model.LG02.5200;evm.model.LG03.243;evm.model.LG03.2517;evm.model.LG03.4650;evm.model.LG03.786;evm.model.LG04.4379;evm.model.LG04.615;evm.model.LG05.1902;evm.model.LG06.1;evm.model.LG06.509;evm.mo…
GO:0006725	cellular aromatic compound metabolic process	25	2155	7.97e-05	0.000136928	evm.model.LG01.1713;evm.model.LG01.2348;evm.model.LG01.4060;evm.model.LG01.5531;evm.model.LG01.5621;evm.model.LG01.5728;evm.model.LG01.6149;evm.model.LG01.6667;evm.model.LG02.2023;evm.model.LG02.5111;evm.model.LG02.5200;evm.model.LG03.243;evm.model.LG03.2517;evm.model.LG03.4650;evm.model.LG03.786;evm.model.LG04.4379;evm.model.LG04.615;evm.model.LG05.1902;evm.model.LG06.1;evm.model.LG06.509;evm.mo…
GO:1901360	organic cyclic compound metabolic process	25	2200	0.000113544	0.00019085	evm.model.LG01.1713;evm.model.LG01.2348;evm.model.LG01.4060;evm.model.LG01.5531;evm.model.LG01.5621;evm.model.LG01.5728;evm.model.LG01.6149;evm.model.LG01.6667;evm.model.LG02.2023;evm.model.LG02.5111;evm.model.LG02.5200;evm.model.LG03.243;evm.model.LG03.2517;evm.model.LG03.4650;evm.model.LG03.786;evm.model.LG04.4379;evm.model.LG04.615;evm.model.LG05.1902;evm.model.LG06.1;evm.model.LG06.509;evm.mo…
GO:0044238	primary metabolic process	46	5983	0.000263499	0.000433676	evm.model.LG01.1713;evm.model.LG01.2348;evm.model.LG01.4060;evm.model.LG01.4718;evm.model.LG01.5377;evm.model.LG01.5531;evm.model.LG01.5621;evm.model.LG01.5728;evm.model.LG01.6149;evm.model.LG01.6667;evm.model.LG01.8768;evm.model.LG02.2023;evm.model.LG02.2141;evm.model.LG02.491;evm.model.LG02.5111;evm.model.LG02.5200;evm.model.LG03.243;evm.model.LG03.2517;evm.model.LG03.4650;evm.model.LG03.786;ev…
GO:0009719	response to endogenous stimulus	5	111	0.000357659	0.000554021	evm.model.LG01.2348;evm.model.LG01.5621;evm.model.LG01.6149;evm.model.LG02.5200;evm.model.LG04.4379
GO:0009725	response to hormone	5	111	0.000357659	0.000554021	evm.model.LG01.2348;evm.model.LG01.5621;evm.model.LG01.6149;evm.model.LG02.5200;evm.model.LG04.4379
GO:0010033	response to organic substance	5	111	0.000357659	0.000554021	evm.model.LG01.2348;evm.model.LG01.5621;evm.model.LG01.6149;evm.model.LG02.5200;evm.model.LG04.4379
GO:0044249	cellular biosynthetic process	25	2364	0.000375327	0.000570208	evm.model.LG01.1713;evm.model.LG01.2348;evm.model.LG01.4060;evm.model.LG01.5531;evm.model.LG01.5621;evm.model.LG01.5728;evm.model.LG01.6149;evm.model.LG01.6667;evm.model.LG02.2023;evm.model.LG02.5111;evm.model.LG02.5200;evm.model.LG03.243;evm.model.LG03.2517;evm.model.LG03.4650;evm.model.LG03.786;evm.model.LG04.4379;evm.model.LG04.615;evm.model.LG05.1902;evm.model.LG06.1;evm.model.LG06.509;evm.mo…
GO:0006464	cellular protein modification process	20	1678	0.000425162	0.000621997	evm.model.LG01.4718;evm.model.LG01.5377;evm.model.LG01.8768;evm.model.LG02.491;evm.model.LG04.1507;evm.model.LG04.1508;evm.model.LG04.1509;evm.model.LG04.4250;evm.model.LG04.4251;evm.model.LG04.4581;evm.model.LG04.680;evm.model.LG06.2265;evm.model.LG06.2304;evm.model.LG06.2426;evm.model.LG06.2427;evm.model.LG06.2461;evm.model.LG07.1144;evm.model.LG07.2785;evm.model.LG08.216;evm.model.LG08.384
GO:0036211	protein modification process	20	1678	0.000425162	0.000621997	evm.model.LG01.4718;evm.model.LG01.5377;evm.model.LG01.8768;evm.model.LG02.491;evm.model.LG04.1507;evm.model.LG04.1508;evm.model.LG04.1509;evm.model.LG04.4250;evm.model.LG04.4251;evm.model.LG04.4581;evm.model.LG04.680;evm.model.LG06.2265;evm.model.LG06.2304;evm.model.LG06.2426;evm.model.LG06.2427;evm.model.LG06.2461;evm.model.LG07.1144;evm.model.LG07.2785;evm.model.LG08.216;evm.model.LG08.384
GO:1901576	organic substance biosynthetic process	25	2412	0.000519062	0.000745562	evm.model.LG01.1713;evm.model.LG01.2348;evm.model.LG01.4060;evm.model.LG01.5531;evm.model.LG01.5621;evm.model.LG01.5728;evm.model.LG01.6149;evm.model.LG01.6667;evm.model.LG02.2023;evm.model.LG02.5111;evm.model.LG02.5200;evm.model.LG03.243;evm.model.LG03.2517;evm.model.LG03.4650;evm.model.LG03.786;evm.model.LG04.4379;evm.model.LG04.615;evm.model.LG05.1902;evm.model.LG06.1;evm.model.LG06.509;evm.mo…
GO:0071704	organic substance metabolic process	46	6212	0.000852083	0.00120204	evm.model.LG01.1713;evm.model.LG01.2348;evm.model.LG01.4060;evm.model.LG01.4718;evm.model.LG01.5377;evm.model.LG01.5531;evm.model.LG01.5621;evm.model.LG01.5728;evm.model.LG01.6149;evm.model.LG01.6667;evm.model.LG01.8768;evm.model.LG02.2023;evm.model.LG02.2141;evm.model.LG02.491;evm.model.LG02.5111;evm.model.LG02.5200;evm.model.LG03.243;evm.model.LG03.2517;evm.model.LG03.4650;evm.model.LG03.786;ev…
GO:0043412	macromolecule modification	20	1774	0.000887929	0.00123064	evm.model.LG01.4718;evm.model.LG01.5377;evm.model.LG01.8768;evm.model.LG02.491;evm.model.LG04.1507;evm.model.LG04.1508;evm.model.LG04.1509;evm.model.LG04.4250;evm.model.LG04.4251;evm.model.LG04.4581;evm.model.LG04.680;evm.model.LG06.2265;evm.model.LG06.2304;evm.model.LG06.2426;evm.model.LG06.2427;evm.model.LG06.2461;evm.model.LG07.1144;evm.model.LG07.2785;evm.model.LG08.216;evm.model.LG08.384
GO:0006796	phosphate-containing compound metabolic process	20	1790	0.000997638	0.00135885	evm.model.LG01.4718;evm.model.LG01.5377;evm.model.LG01.8768;evm.model.LG02.491;evm.model.LG04.1507;evm.model.LG04.1508;evm.model.LG04.1509;evm.model.LG04.4250;evm.model.LG04.4251;evm.model.LG04.4581;evm.model.LG04.680;evm.model.LG06.2265;evm.model.LG06.2304;evm.model.LG06.2426;evm.model.LG06.2427;evm.model.LG06.2461;evm.model.LG07.1144;evm.model.LG07.2785;evm.model.LG08.216;evm.model.LG08.384
GO:0006793	phosphorus metabolic process	20	1794	0.00102685	0.00137493	evm.model.LG01.4718;evm.model.LG01.5377;evm.model.LG01.8768;evm.model.LG02.491;evm.model.LG04.1507;evm.model.LG04.1508;evm.model.LG04.1509;evm.model.LG04.4250;evm.model.LG04.4251;evm.model.LG04.4581;evm.model.LG04.680;evm.model.LG06.2265;evm.model.LG06.2304;evm.model.LG06.2426;evm.model.LG06.2427;evm.model.LG06.2461;evm.model.LG07.1144;evm.model.LG07.2785;evm.model.LG08.216;evm.model.LG08.384
GO:0009058	biosynthetic process	25	2556	0.00128816	0.00169608	evm.model.LG01.1713;evm.model.LG01.2348;evm.model.LG01.4060;evm.model.LG01.5531;evm.model.LG01.5621;evm.model.LG01.5728;evm.model.LG01.6149;evm.model.LG01.6667;evm.model.LG02.2023;evm.model.LG02.5111;evm.model.LG02.5200;evm.model.LG03.243;evm.model.LG03.2517;evm.model.LG03.4650;evm.model.LG03.786;evm.model.LG04.4379;evm.model.LG04.615;evm.model.LG05.1902;evm.model.LG06.1;evm.model.LG06.509;evm.mo…
GO:0042221	response to chemical	5	150	0.00140162	0.00181521	evm.model.LG01.2348;evm.model.LG01.5621;evm.model.LG01.6149;evm.model.LG02.5200;evm.model.LG04.4379
GO:0034641	cellular nitrogen compound metabolic process	25	2593	0.00160347	0.00204313	evm.model.LG01.1713;evm.model.LG01.2348;evm.model.LG01.4060;evm.model.LG01.5531;evm.model.LG01.5621;evm.model.LG01.5728;evm.model.LG01.6149;evm.model.LG01.6667;evm.model.LG02.2023;evm.model.LG02.5111;evm.model.LG02.5200;evm.model.LG03.243;evm.model.LG03.2517;evm.model.LG03.4650;evm.model.LG03.786;evm.model.LG04.4379;evm.model.LG04.615;evm.model.LG05.1902;evm.model.LG06.1;evm.model.LG06.509;evm.mo…
GO:0006807	nitrogen compound metabolic process	25	2822	0.00551006	0.00690944	evm.model.LG01.1713;evm.model.LG01.2348;evm.model.LG01.4060;evm.model.LG01.5531;evm.model.LG01.5621;evm.model.LG01.5728;evm.model.LG01.6149;evm.model.LG01.6667;evm.model.LG02.2023;evm.model.LG02.5111;evm.model.LG02.5200;evm.model.LG03.243;evm.model.LG03.2517;evm.model.LG03.4650;evm.model.LG03.786;evm.model.LG04.4379;evm.model.LG04.615;evm.model.LG05.1902;evm.model.LG06.1;evm.model.LG06.509;evm.mo…
GO:0044267	cellular protein metabolic process	20	2265	0.016236	0.0200414	evm.model.LG01.4718;evm.model.LG01.5377;evm.model.LG01.8768;evm.model.LG02.491;evm.model.LG04.1507;evm.model.LG04.1508;evm.model.LG04.1509;evm.model.LG04.4250;evm.model.LG04.4251;evm.model.LG04.4581;evm.model.LG04.680;evm.model.LG06.2265;evm.model.LG06.2304;evm.model.LG06.2426;evm.model.LG06.2427;evm.model.LG06.2461;evm.model.LG07.1144;evm.model.LG07.2785;evm.model.LG08.216;evm.model.LG08.384
GO:0019538	protein metabolic process	20	2776	0.1105	0.1343	evm.model.LG01.4718;evm.model.LG01.5377;evm.model.LG01.8768;evm.model.LG02.491;evm.model.LG04.1507;evm.model.LG04.1508;evm.model.LG04.1509;evm.model.LG04.4250;evm.model.LG04.4251;evm.model.LG04.4581;evm.model.LG04.680;evm.model.LG06.2265;evm.model.LG06.2304;evm.model.LG06.2426;evm.model.LG06.2427;evm.model.LG06.2461;evm.model.LG07.1144;evm.model.LG07.2785;evm.model.LG08.216;evm.model.LG08.384
GO:0008152	metabolic process	46	7748	0.216605	0.25927	evm.model.LG01.1713;evm.model.LG01.2348;evm.model.LG01.4060;evm.model.LG01.4718;evm.model.LG01.5377;evm.model.LG01.5531;evm.model.LG01.5621;evm.model.LG01.5728;evm.model.LG01.6149;evm.model.LG01.6667;evm.model.LG01.8768;evm.model.LG02.2023;evm.model.LG02.2141;evm.model.LG02.491;evm.model.LG02.5111;evm.model.LG02.5200;evm.model.LG03.243;evm.model.LG03.2517;evm.model.LG03.4650;evm.model.LG03.786;ev…
GO:0000160	phosphorelay signal transduction system	1	53	0.255602	0.301382	evm.model.LG07.2785
GO:0035556	intracellular signal transduction	1	114	0.471027	0.547222	evm.model.LG07.2785
GO:0044763	single-organism cellular process	14	3205	0.890881	1	evm.model.Contig1.108;evm.model.LG01.752;evm.model.LG03.4320;evm.model.LG03.4628;evm.model.LG04.787;evm.model.LG07.1025;evm.model.LG07.1144;evm.model.LG07.2785;evm.model.LG07.3734;evm.model.LG07.596;evm.model.LG08.1058;evm.model.LG08.1803;evm.model.LG08.1808;evm.model.LG08.996
GO:0006811	ion transport	1	479	0.934452	1	evm.model.LG01.752
GO:0055085	transmembrane transport	2	863	0.95821	1	evm.model.LG01.752;evm.model.LG07.3734
GO:0005975	carbohydrate metabolic process	1	806	0.990562	1	evm.model.LG02.2141
GO:0044765	single-organism transport	2	1322	0.996358	1	evm.model.LG01.752;evm.model.LG07.3734
GO:1902578	single-organism localization	2	1334	0.996595	1	evm.model.LG01.752;evm.model.LG07.3734
GO:0006810	transport	2	1580	0.999172	1	evm.model.LG01.752;evm.model.LG07.3734
GO:0051234	establishment of localization	2	1583	0.999187	1	evm.model.LG01.752;evm.model.LG07.3734
GO:0051179	localization	2	1596	0.999247	1	evm.model.LG01.752;evm.model.LG07.3734
GO:0044699	single-organism process	14	5049	0.99996	1	evm.model.Contig1.108;evm.model.LG01.752;evm.model.LG03.4320;evm.model.LG03.4628;evm.model.LG04.787;evm.model.LG07.1025;evm.model.LG07.1144;evm.model.LG07.2785;evm.model.LG07.3734;evm.model.LG07.596;evm.model.LG08.1058;evm.model.LG08.1803;evm.model.LG08.1808;evm.model.LG08.996
GO:0008150	biological_process	57	10289	1	1	evm.model.Contig1.108;evm.model.LG01.1713;evm.model.LG01.2348;evm.model.LG01.4060;evm.model.LG01.4718;evm.model.LG01.5377;evm.model.LG01.5531;evm.model.LG01.5621;evm.model.LG01.5728;evm.model.LG01.6149;evm.model.LG01.6667;evm.model.LG01.752;evm.model.LG01.8768;evm.model.LG02.2023;evm.model.LG02.2141;evm.model.LG02.491;evm.model.LG02.5111;evm.model.LG02.5200;evm.model.LG03.243;evm.model.LG03.2517;…
