# Supplementary figures and images for: Identification of miRNAs and their targets in two Taraxacum species with contrasting rubber-producing ability (part 1 of 2)
Source: Frontiers journal article supplement (doi:10.3389/fpls.2023.1287318), 2023-11-08

**T=evm.model.LG02.2248\_Q=miRN9-5p\_S=752**

category=4\_p=0.0256458225535021

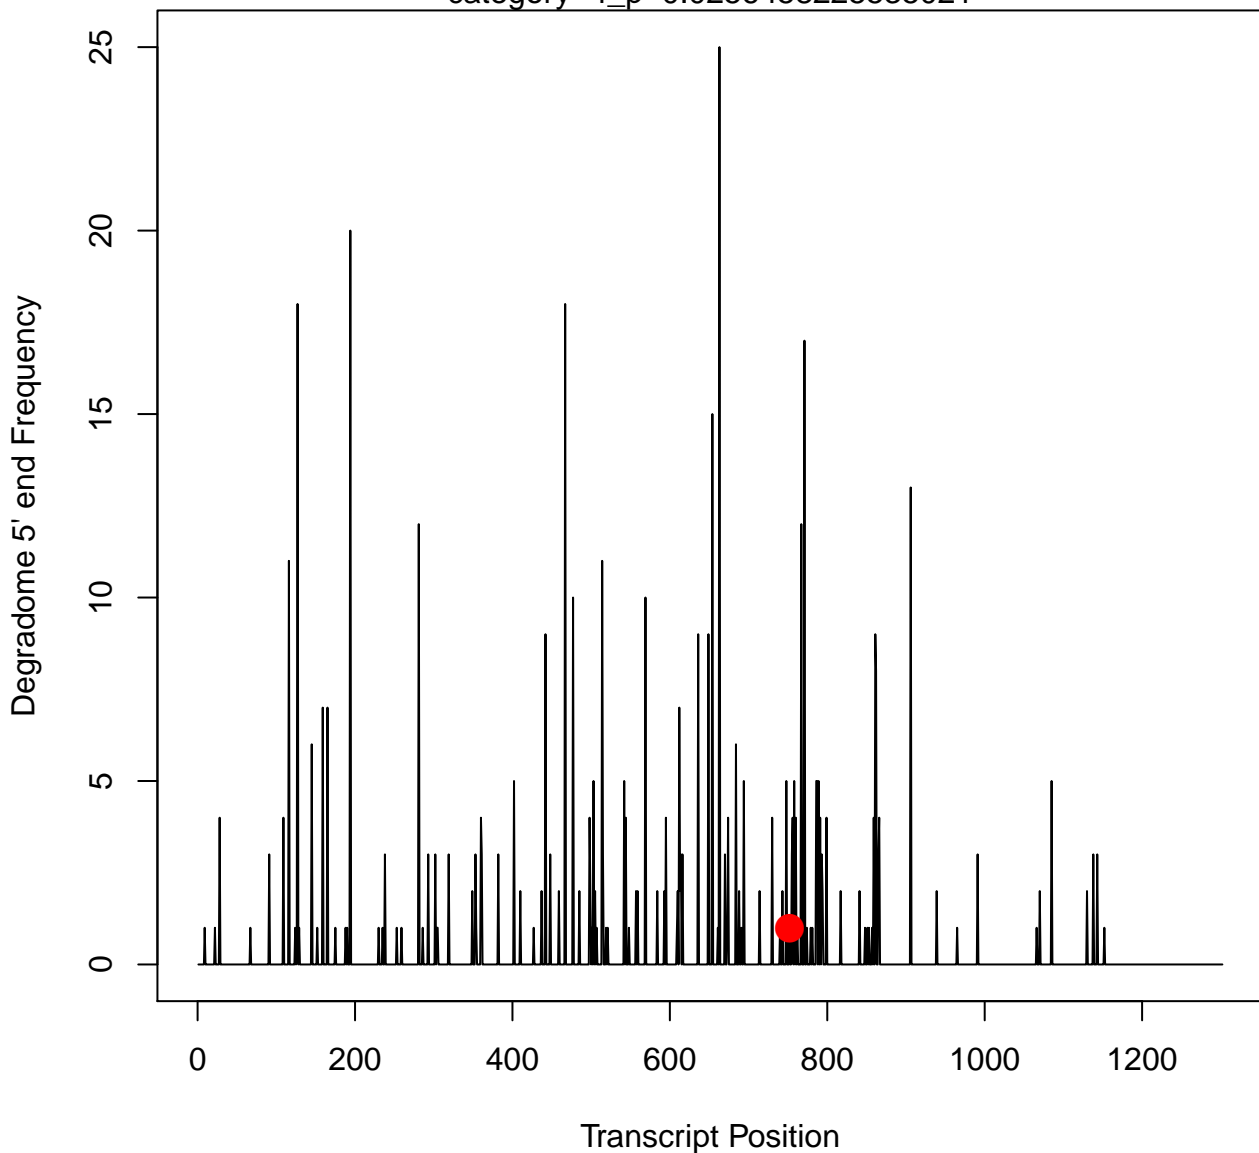

Supplement: Data_Sheet_1.zip [file Data_Sheet_1.zip]

**T=evm.model.LG04.903\_Q=miRN9-5p\_S=752**

category=2\_p=0.0174234189334928

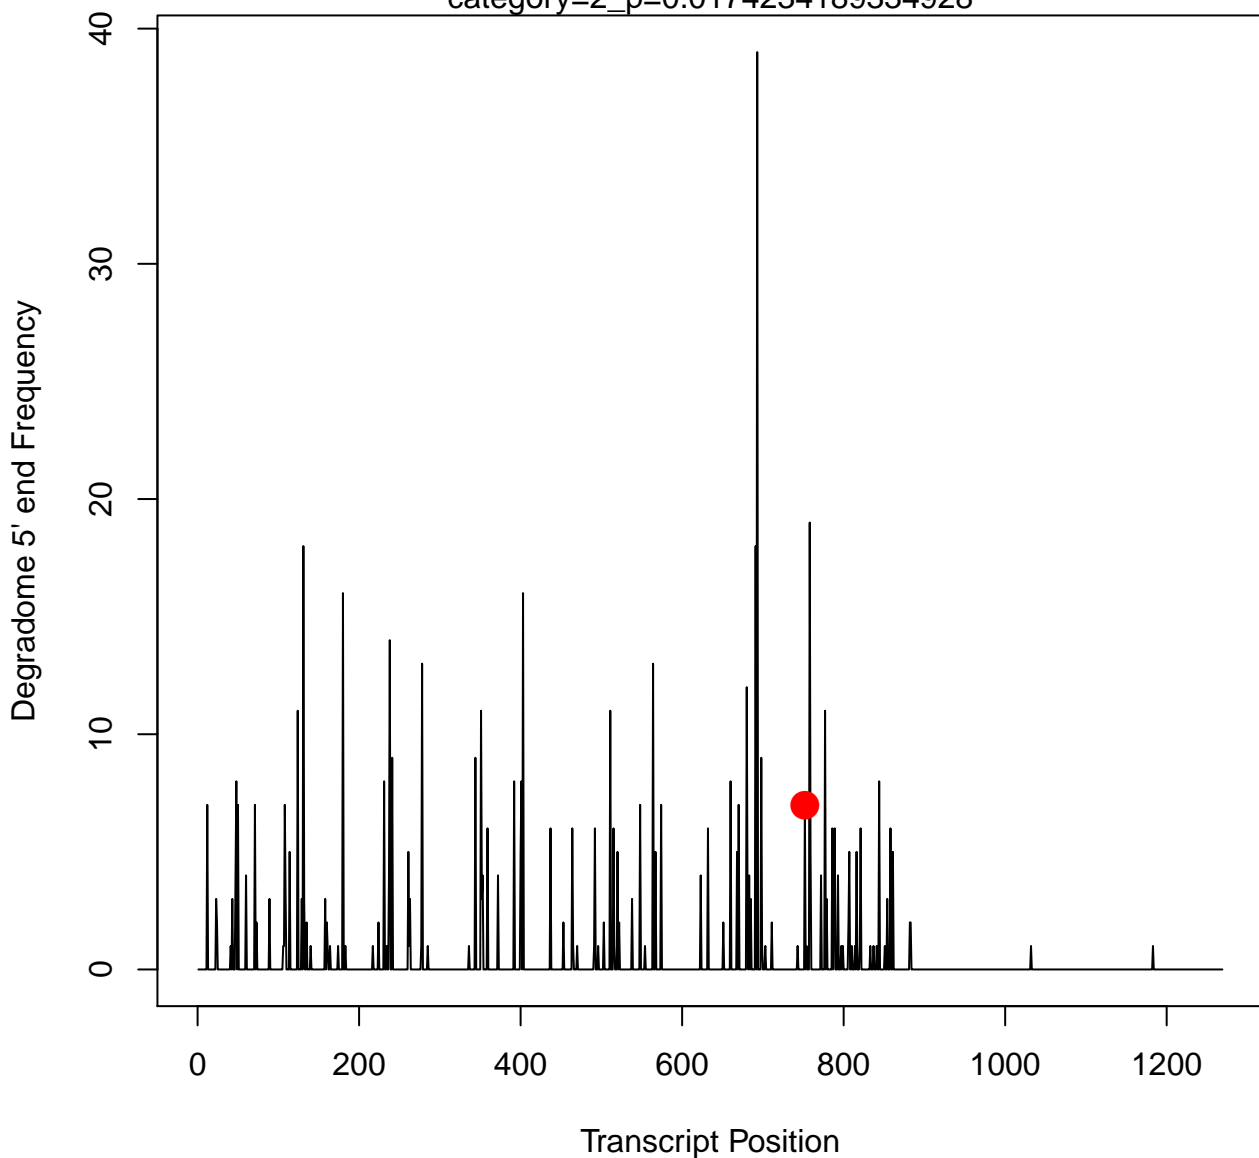

Supplement: Data_Sheet_1.zip [file Data_Sheet_1.zip]

**T=evm.model.LG04.1330\_Q=miRN9-5p\_S=752**

category=3\_p=0.012146249673191

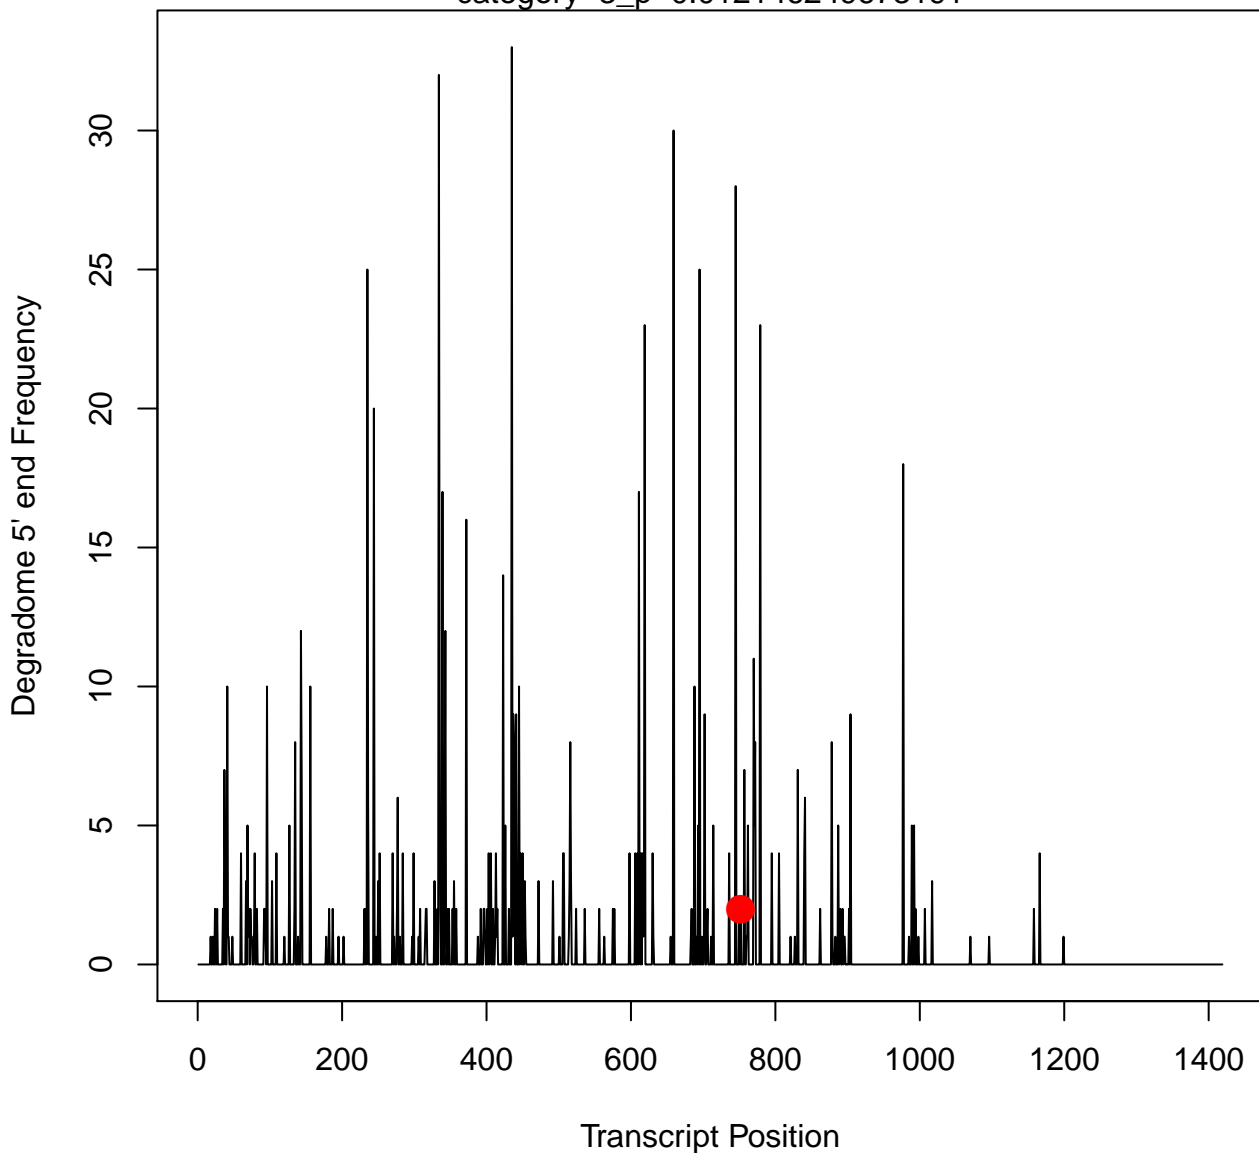

Supplement: Data_Sheet_1.zip [file Data_Sheet_1.zip]

**T=evm.model.LG07.3896\_Q=miR164c-5p\_S=664**

category=0\_p=0.00051912393111464

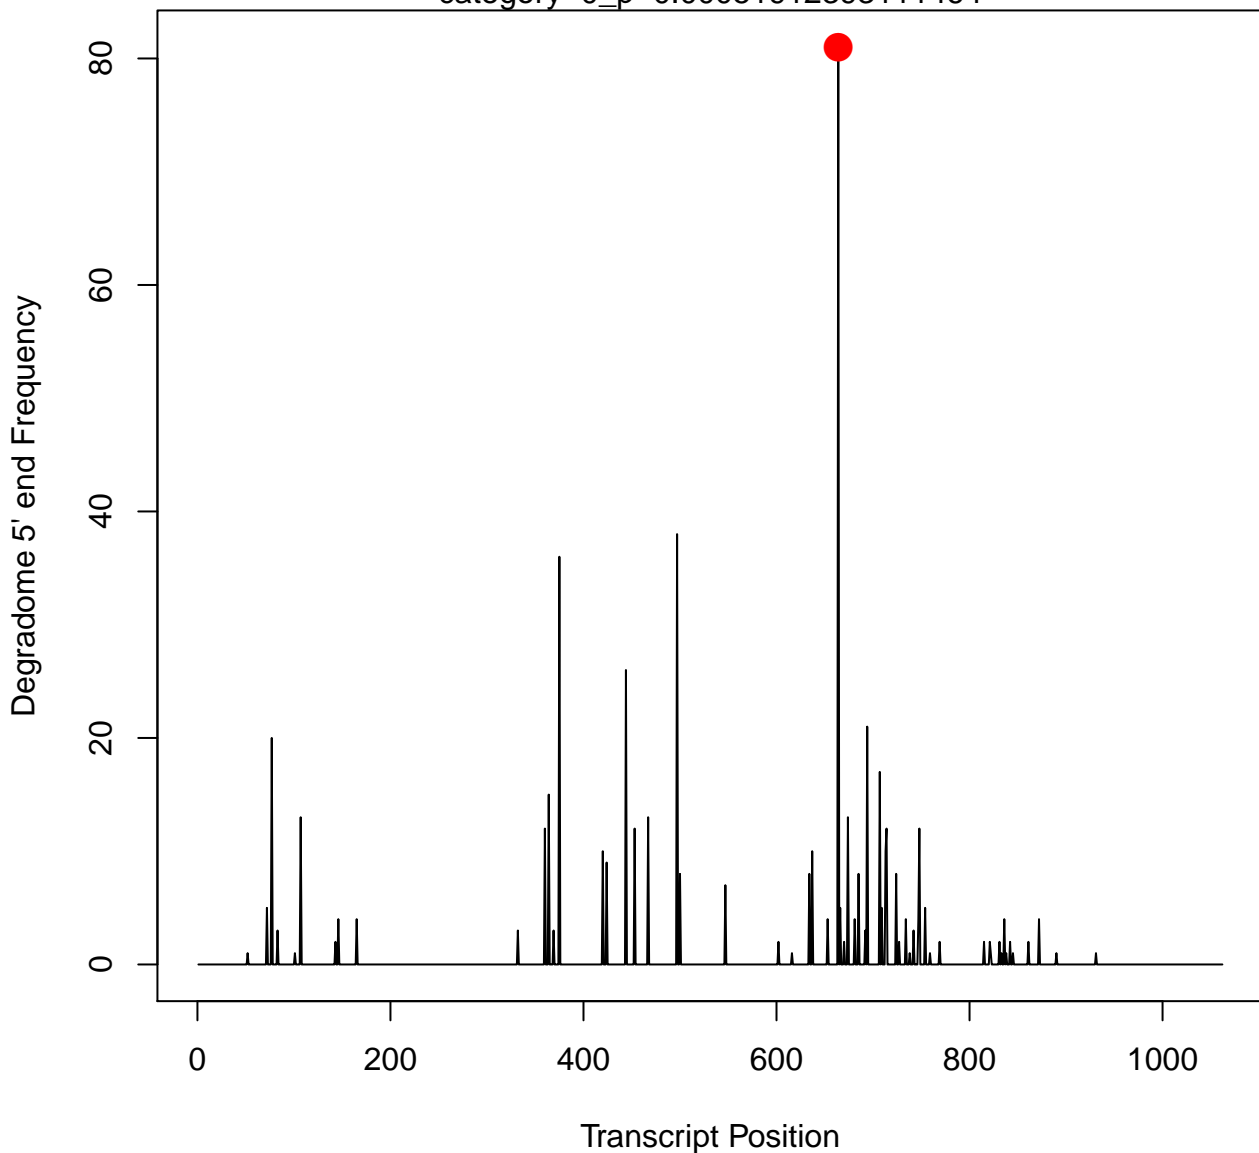

Supplement: Data_Sheet_1.zip [file Data_Sheet_1.zip]

**T=evm.model.LG04.4552\_Q=miRN21-5p\_S=400**

category=2\_p=0.042990999752487

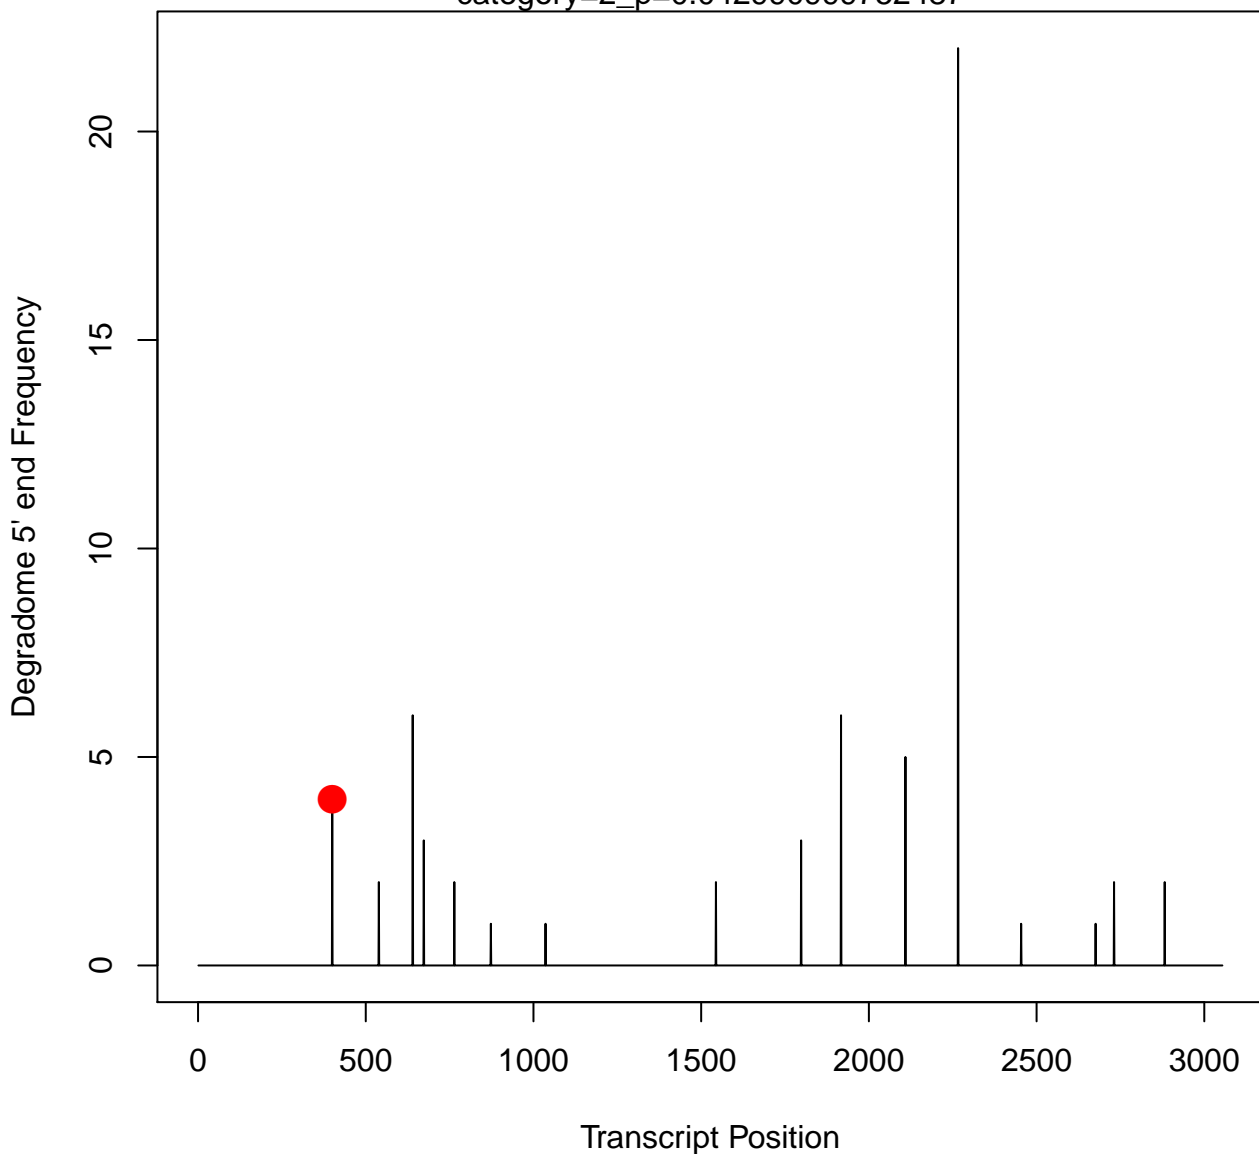

Supplement: Data_Sheet_1.zip [file Data_Sheet_1.zip]

**T=evm.model.LG05.3270\_Q=miR394a-5p\_S=1045**

category=2\_p=0.042990999752487

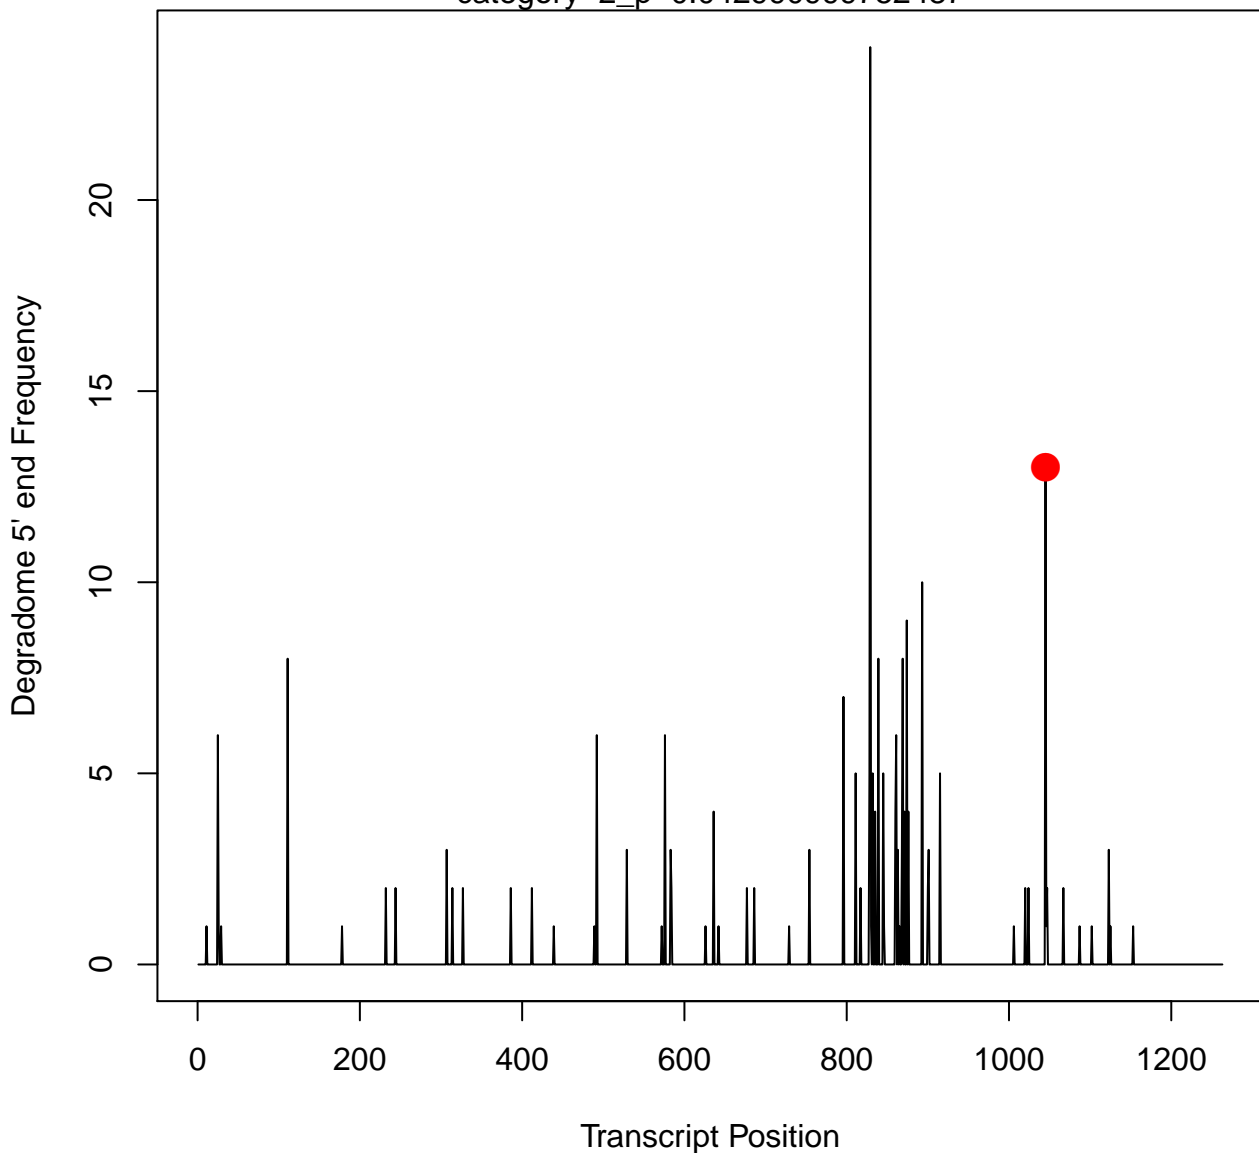

Supplement: Data_Sheet_1.zip [file Data_Sheet_1.zip]

**T=evm.model.LG06.4588\_Q=miR171h-3p\_S=995**

category=2\_p=0.0260209548157995

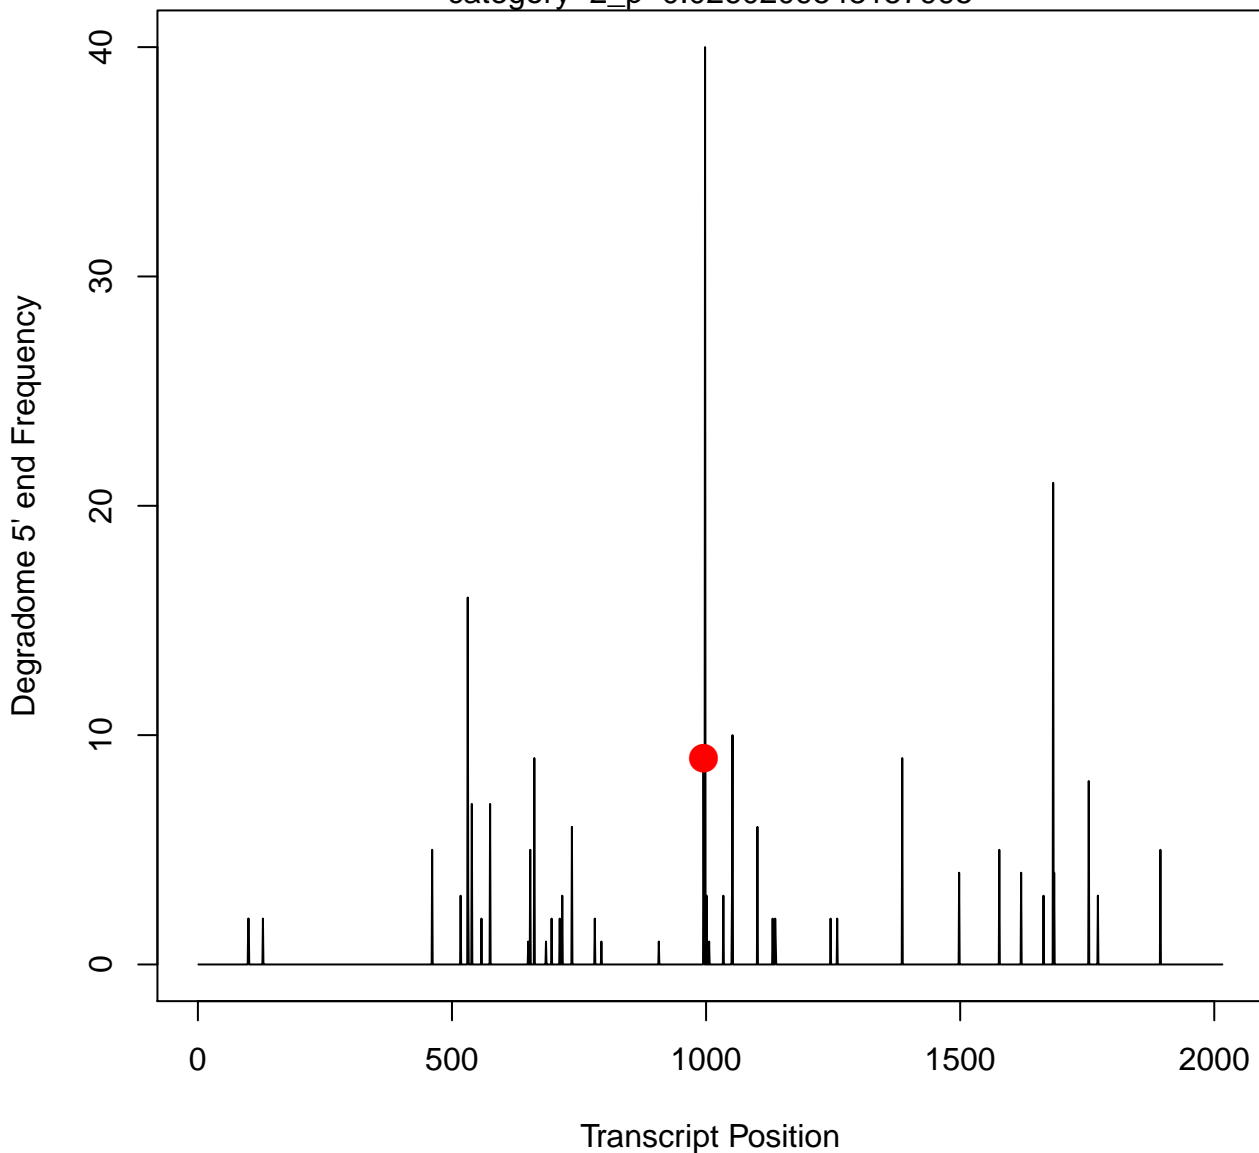

Supplement: Data_Sheet_1.zip [file Data_Sheet_1.zip]

**T=evm.model.LG02.2447\_Q=miR396a-5p\_S=383**

category=0\_p=0.00517912904921392

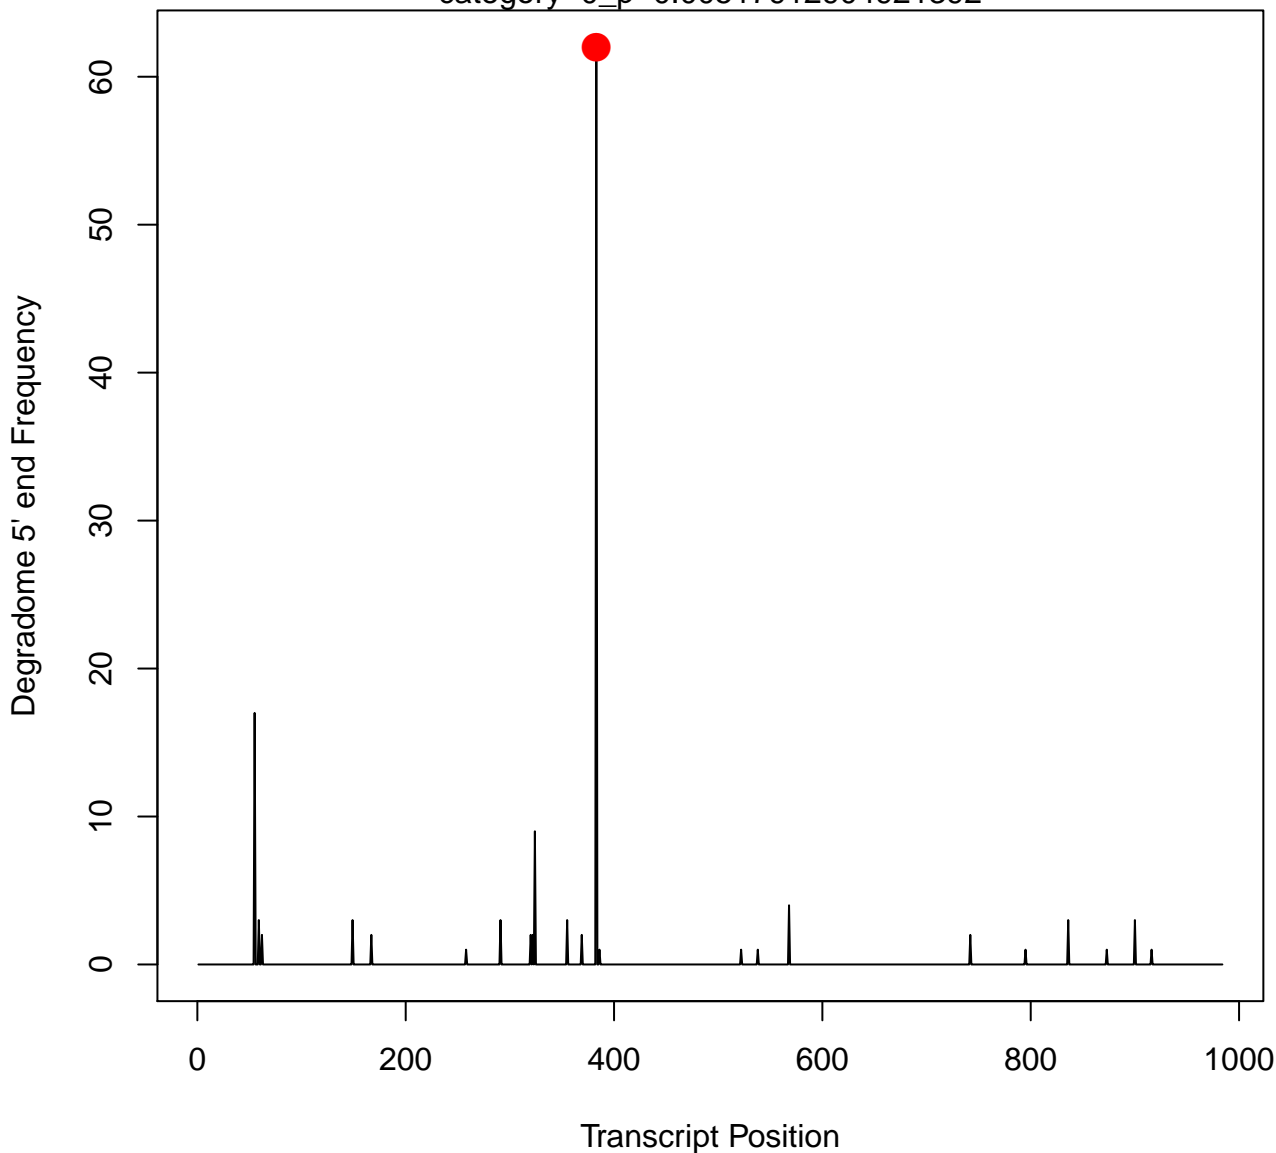

Supplement: Data_Sheet_1.zip [file Data_Sheet_1.zip]

**T=evm.model.LG01.294\_Q=miR396d-5p\_S=1091**

category=0\_p=0.00207487934604456

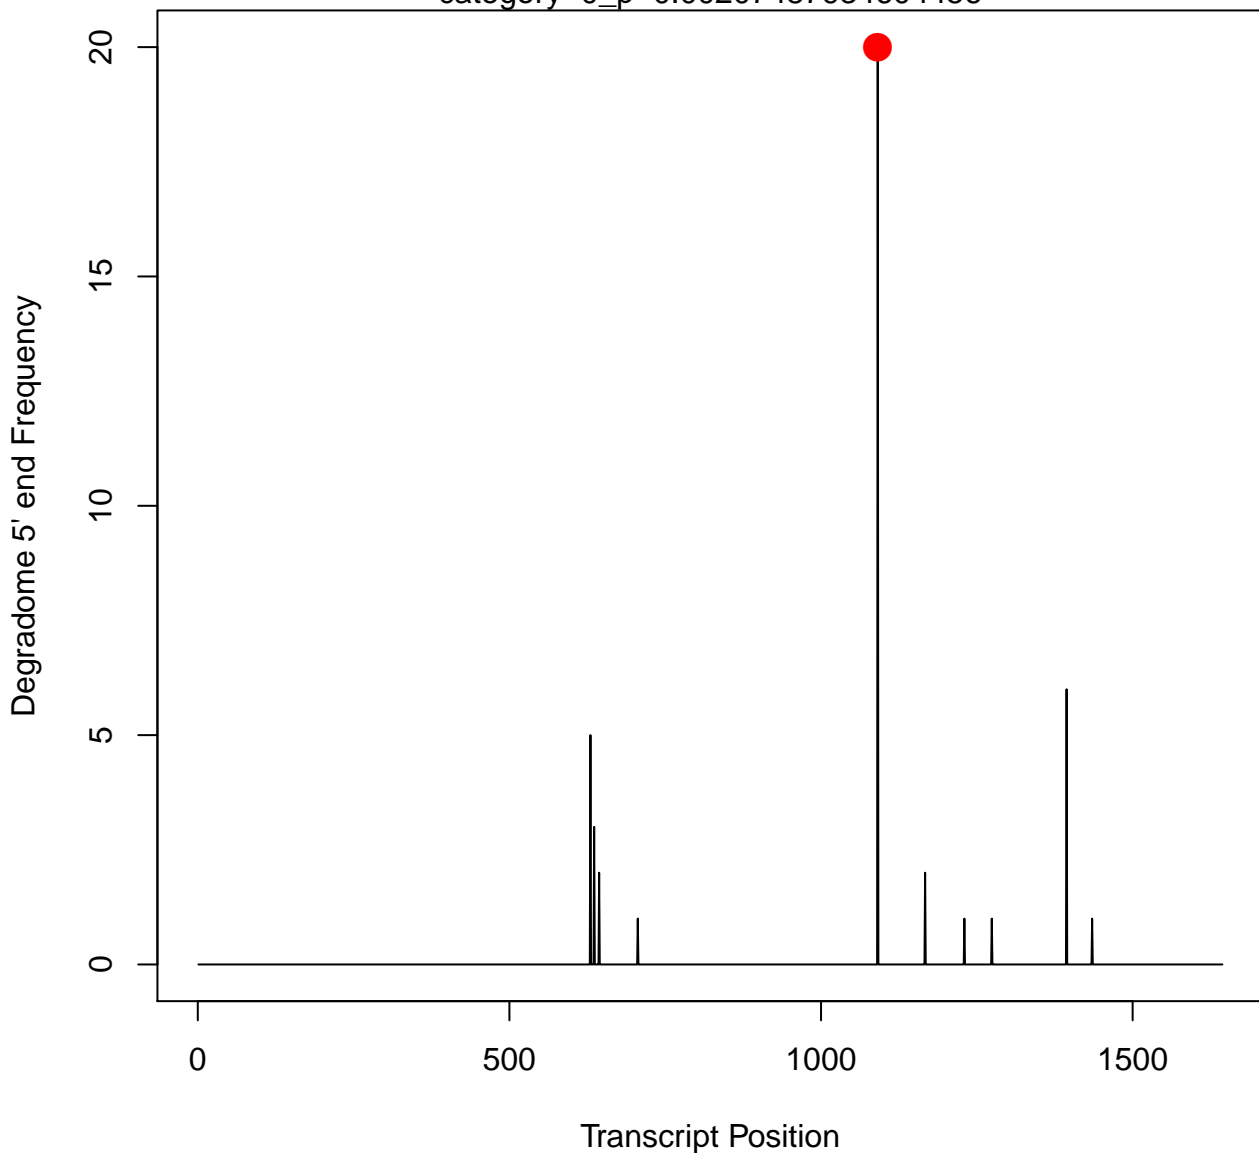

Supplement: Data_Sheet_1.zip [file Data_Sheet_1.zip]

**T=evm.model.LG08.1784\_Q=miRN14-5p\_S=458**

category=4\_p=0.0423765939260693

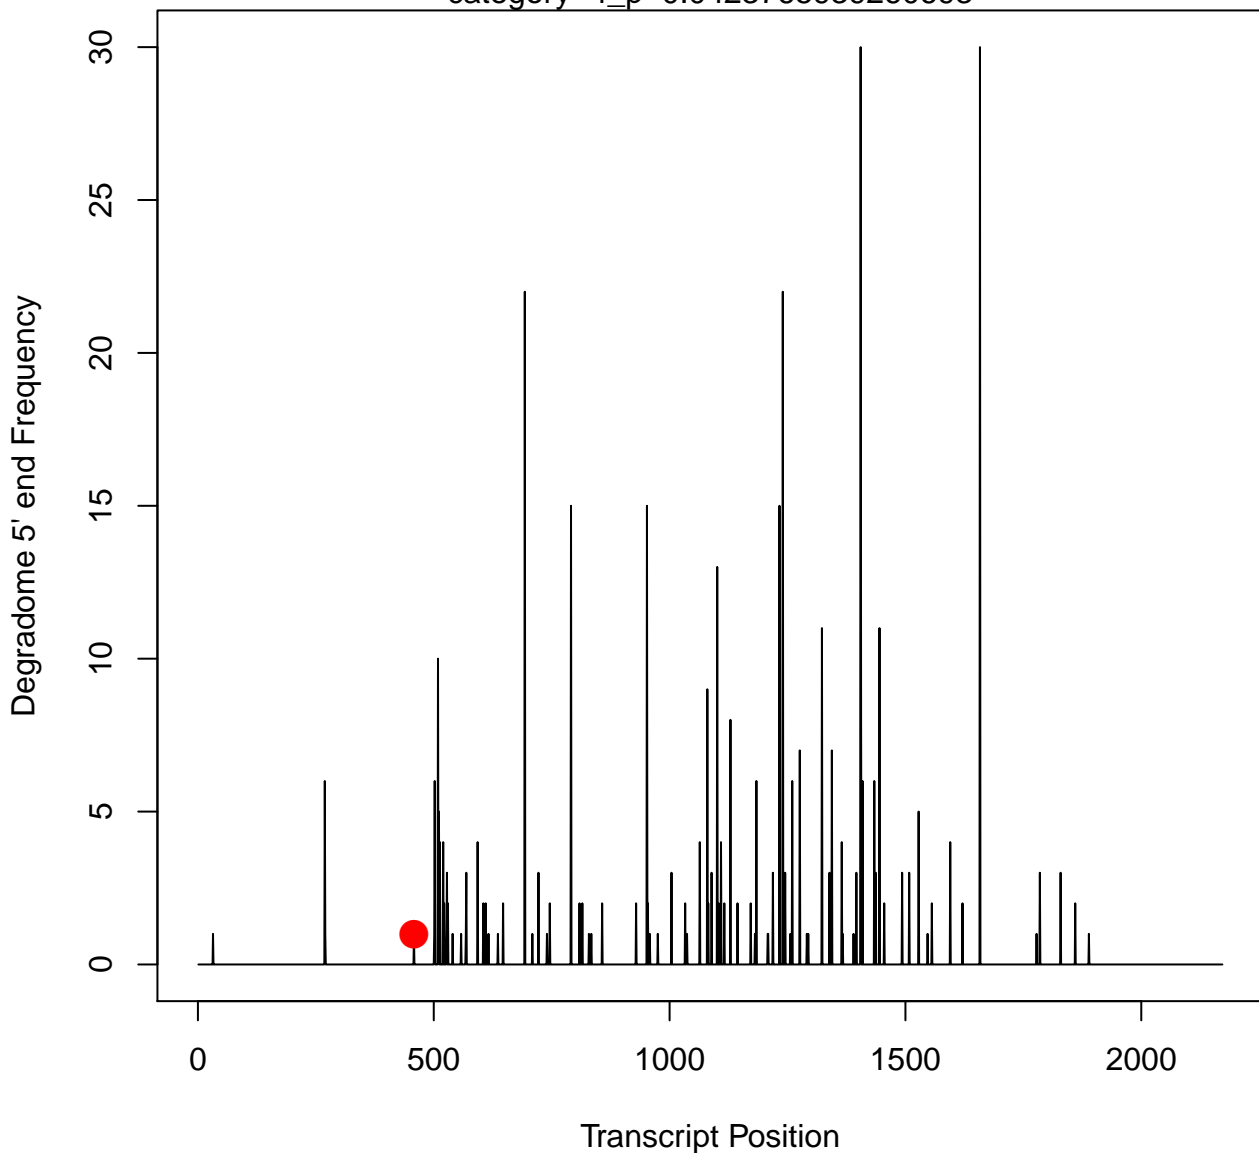

Supplement: Data_Sheet_1.zip [file Data_Sheet_1.zip]

**T=evm.model.LG04.3334\_Q=miRN11-5p\_S=880**

category=2\_p=0.0345432623396535

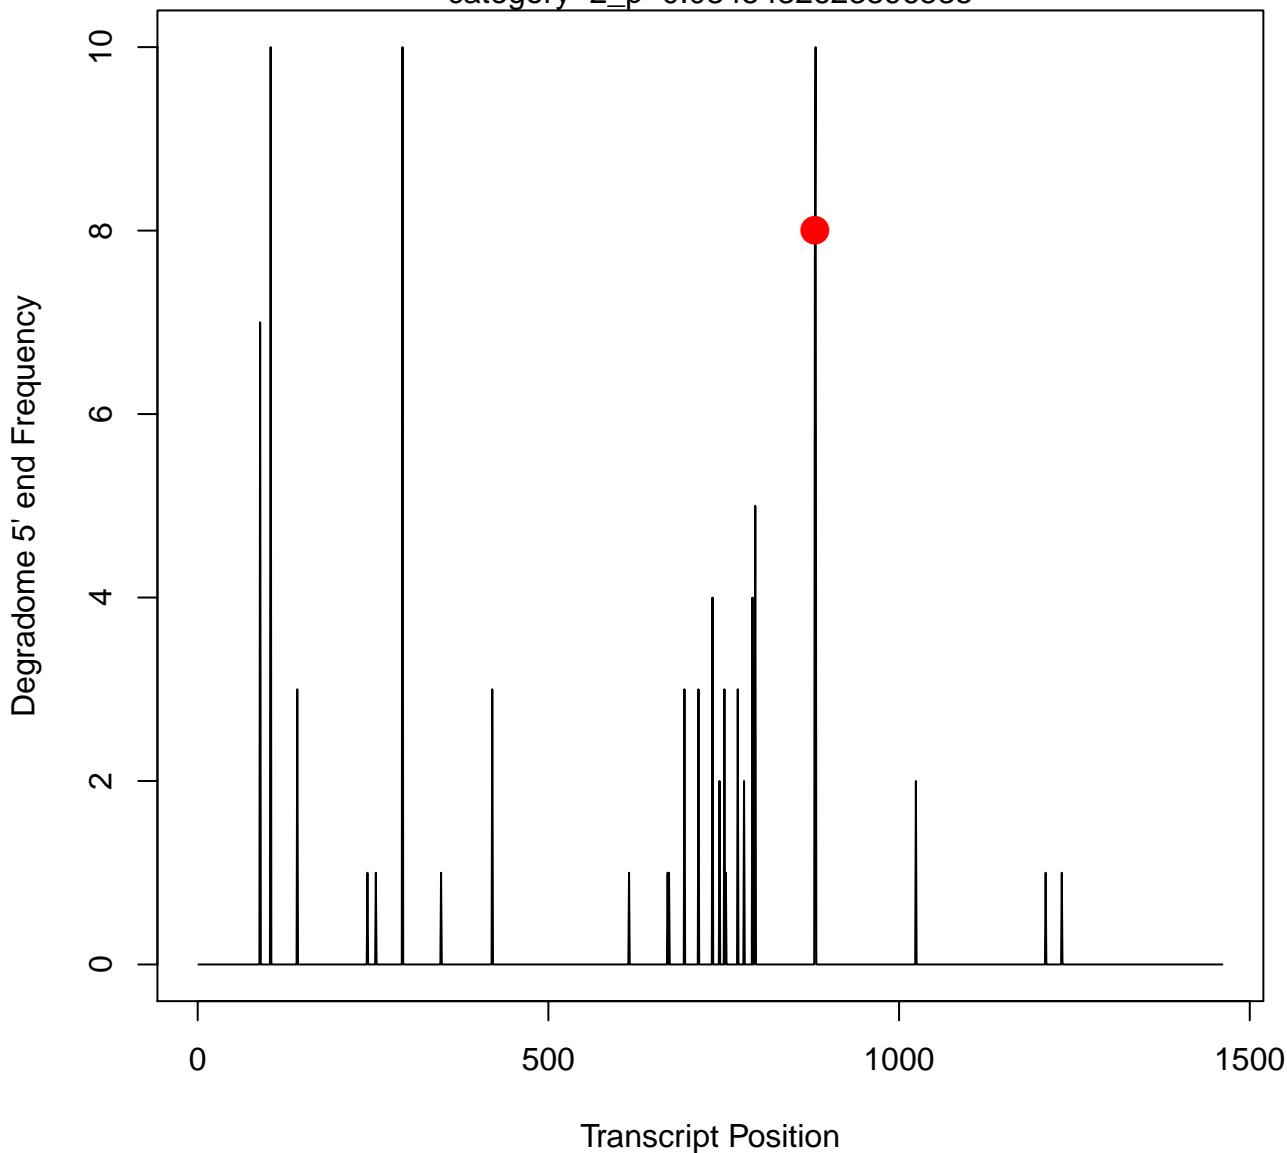

Supplement: Data_Sheet_1.zip [file Data_Sheet_1.zip]

**T=evm.model.LG04.662\_Q=miR396a-5p\_S=642**

category=0\_p=0.00103797837257324

Degradsome 5' end Frequency

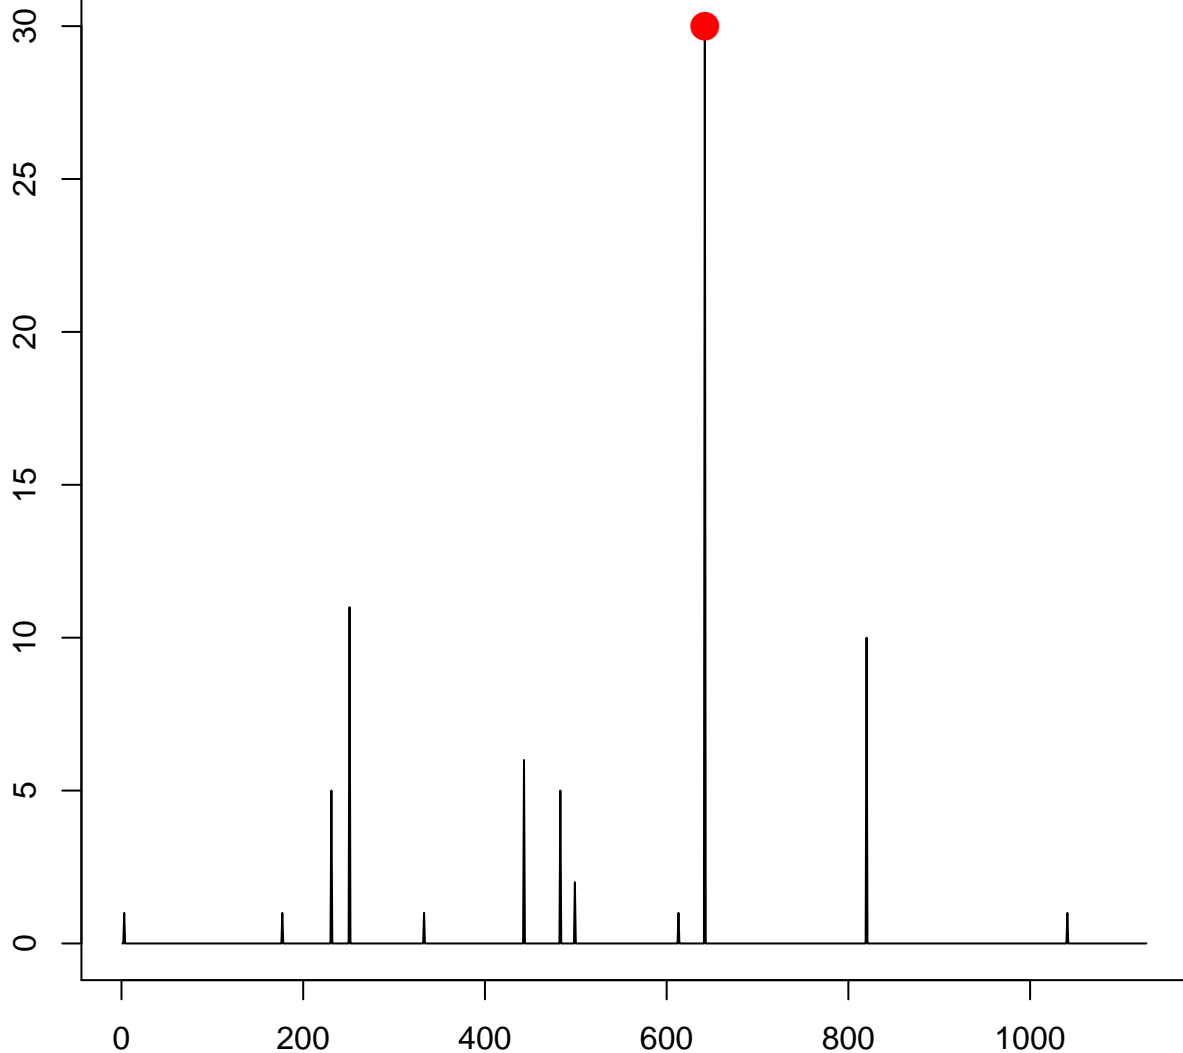

Transcript Position

Supplement: Data_Sheet_1.zip [file Data_Sheet_1.zip]

**T=evm.model.LG02.5093\_Q=miRN15-3p\_S=1615**

category=0\_p=0.00930311277800744

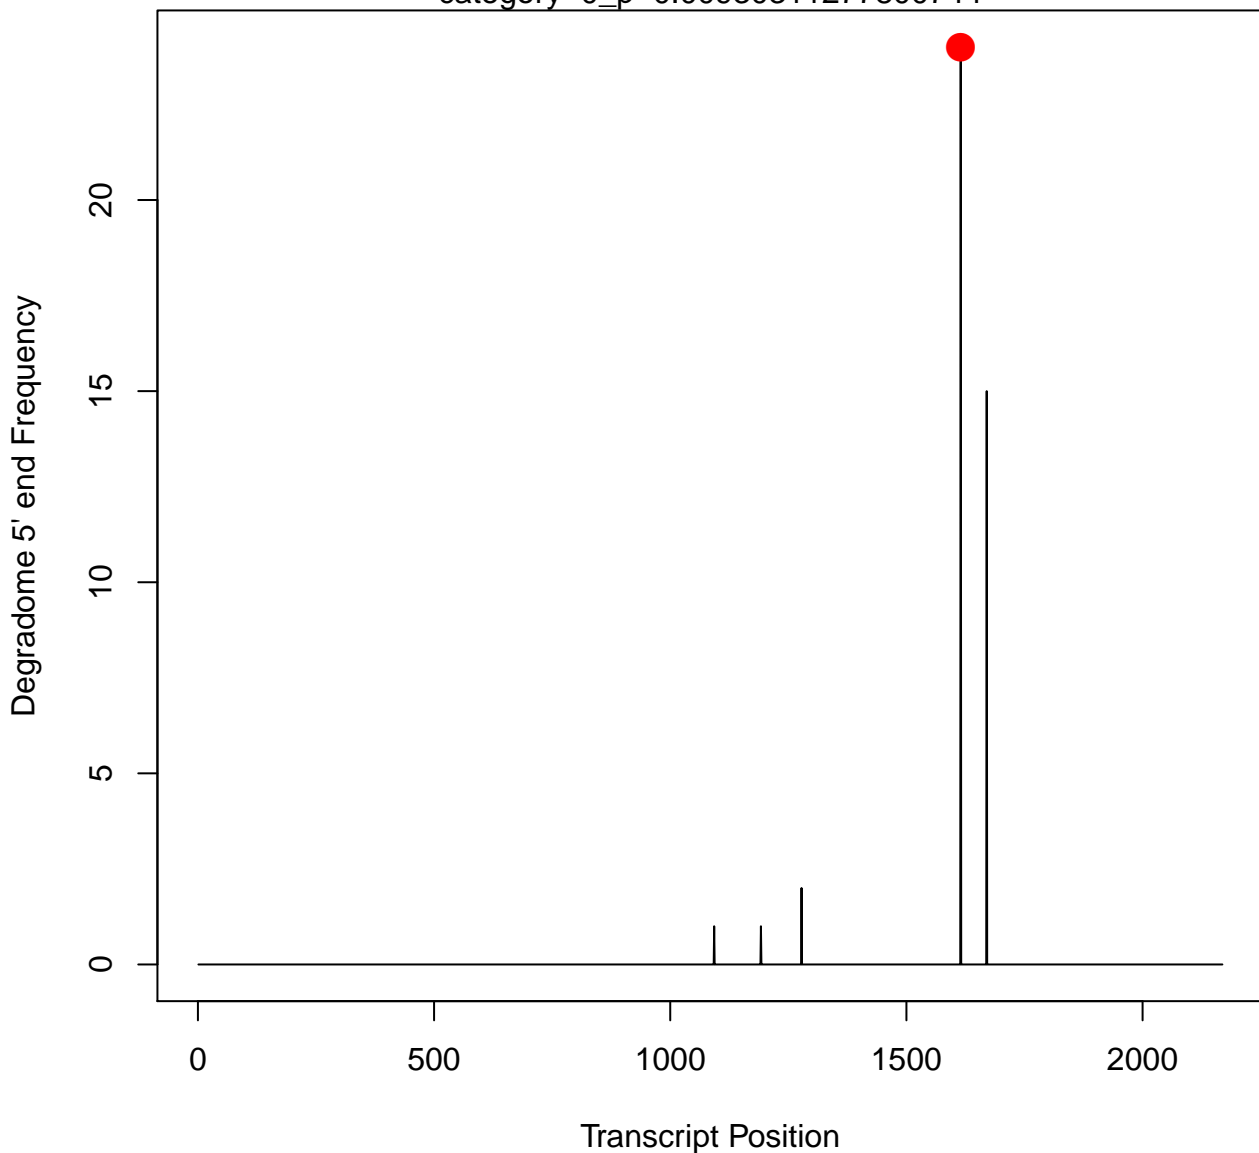

Supplement: Data_Sheet_1.zip [file Data_Sheet_1.zip]

**T=evm.model.LG02.3364\_Q=miR482-3p\_S=49**

category=0\_p=0.00103797837257324

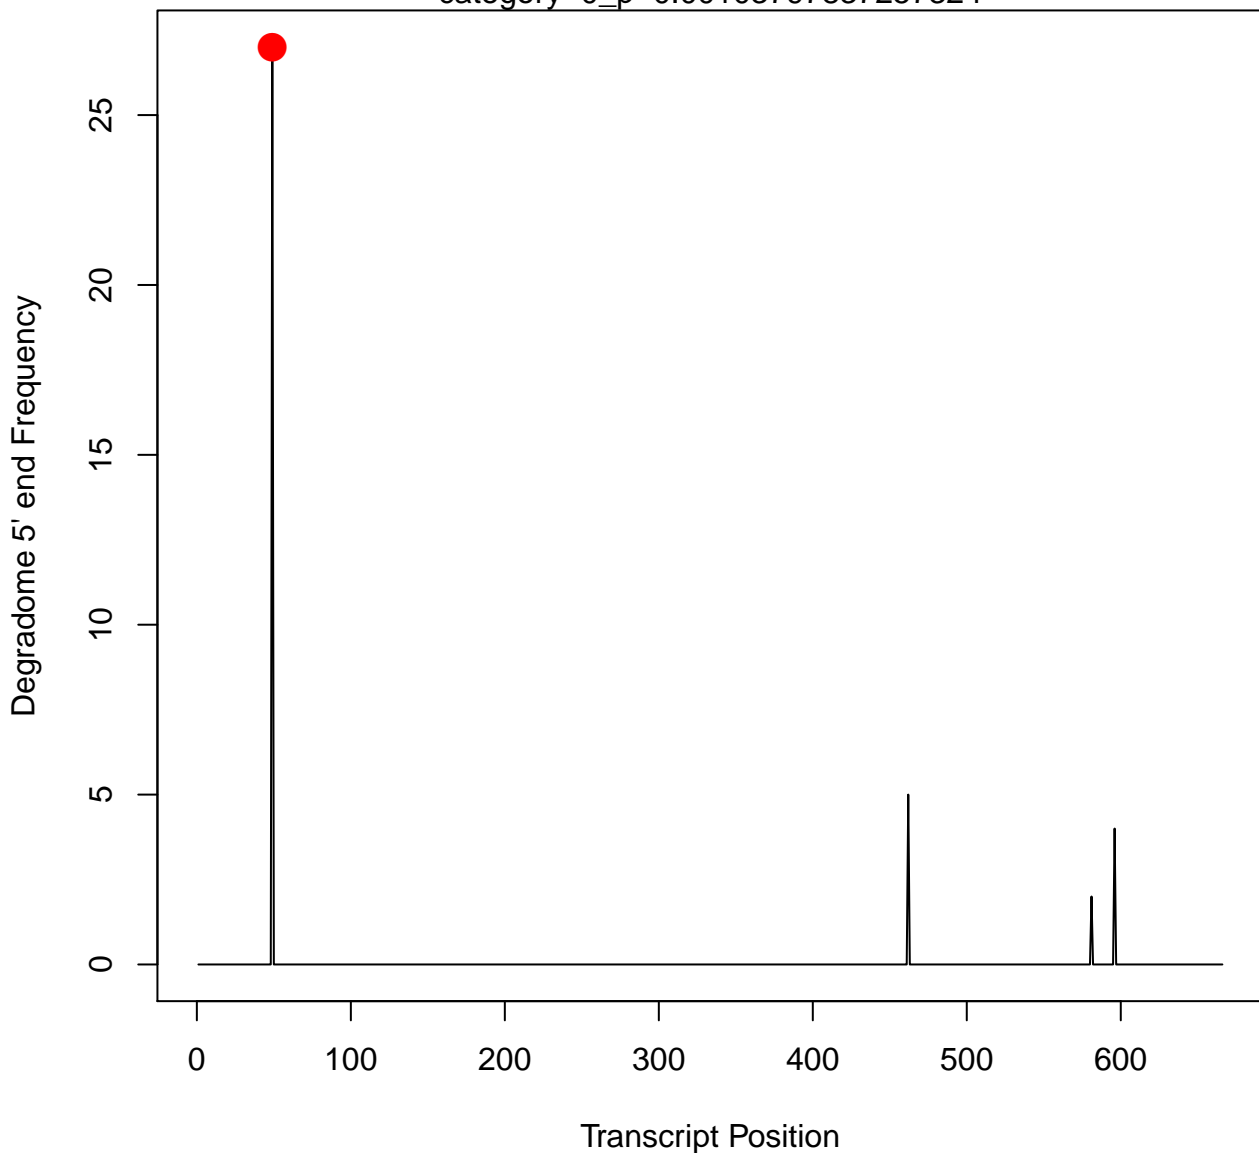

Supplement: Data_Sheet_1.zip [file Data_Sheet_1.zip]

**T=evm.model.LG01.4718\_Q=miRN19a-5p\_S=2113**

category=3\_p=0.0477069564524738

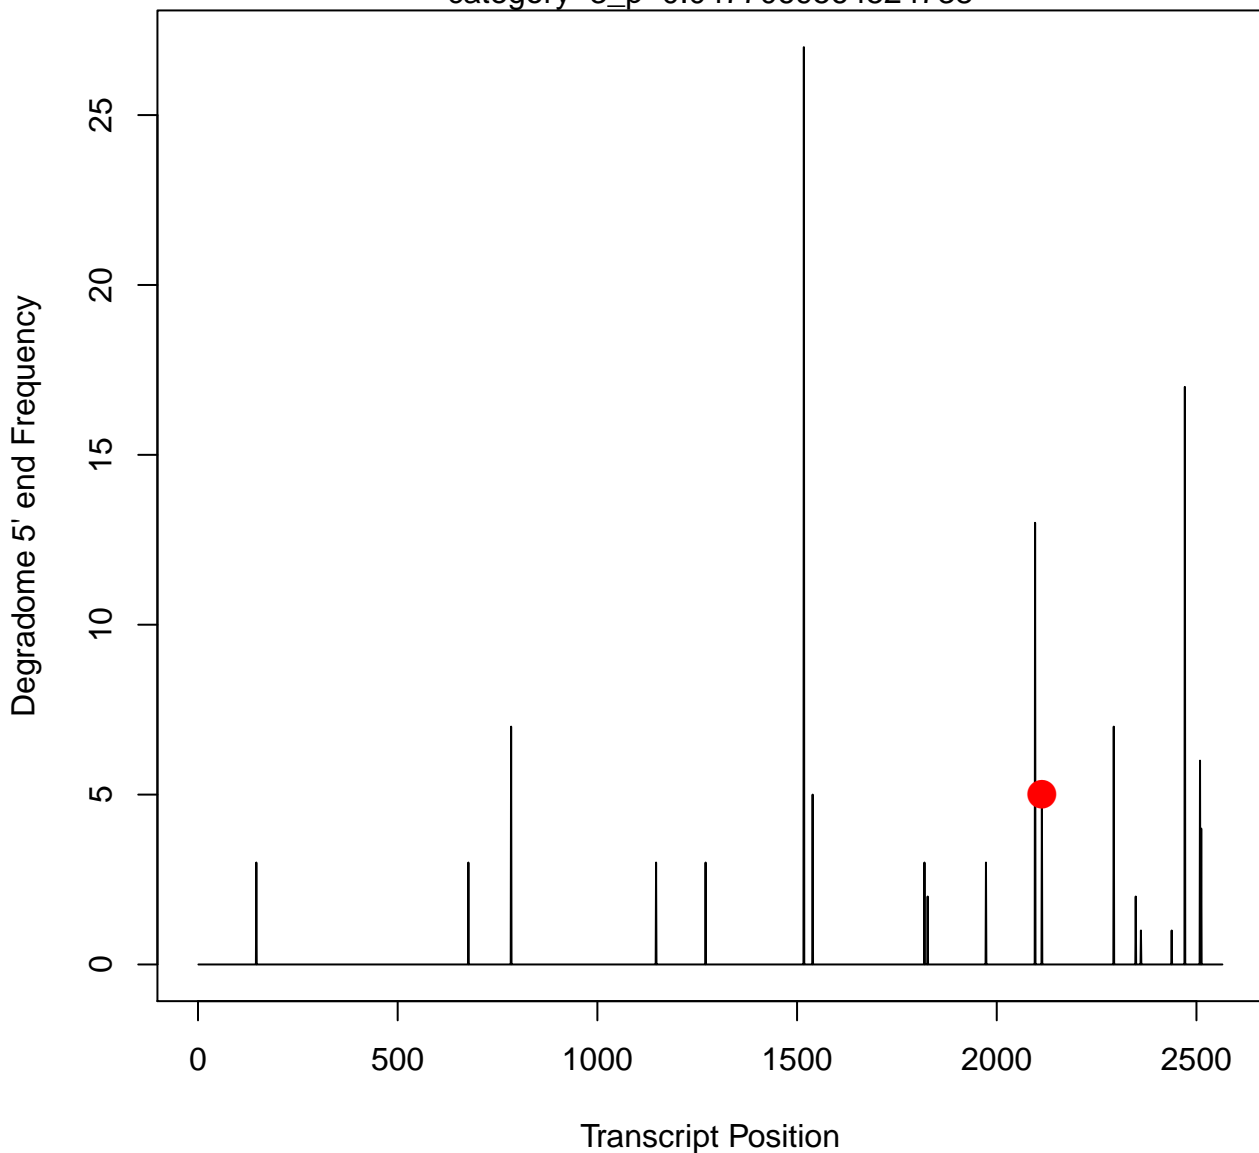

Supplement: Data_Sheet_1.zip [file Data_Sheet_1.zip]

**T=evm.model.LG02.4761\_Q=miRN8-5p\_S=316**

category=3\_p=0.0241449679652586

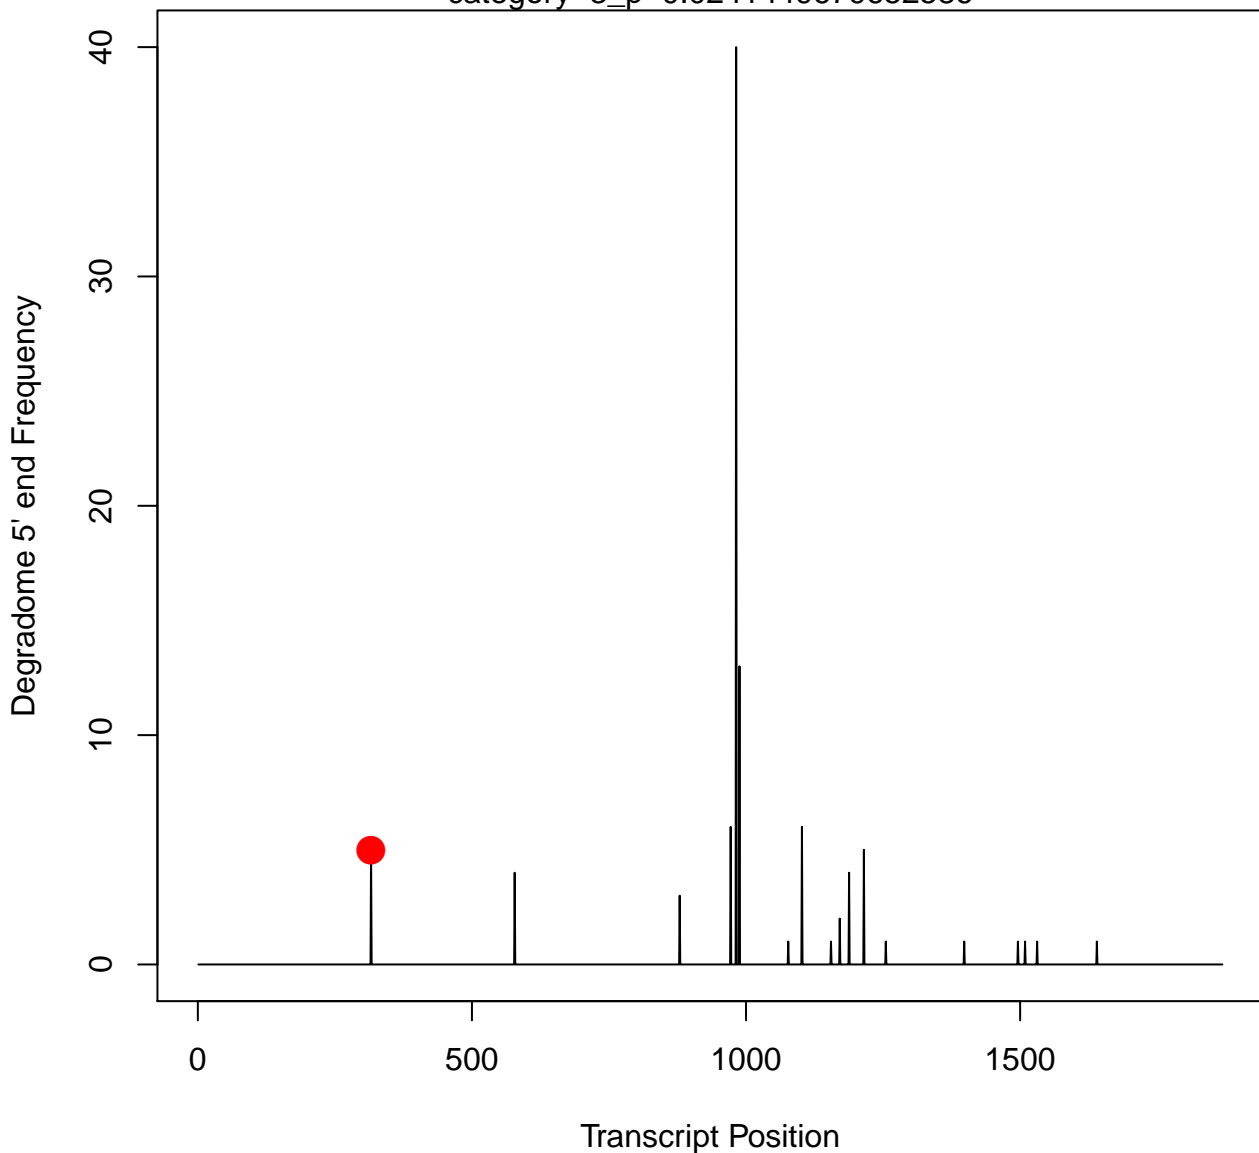

Supplement: Data_Sheet_1.zip [file Data_Sheet_1.zip]

**T=evm.model.LG06.4441\_Q=miR482-3p\_S=565**

category=2\_p=0.0260209548157995

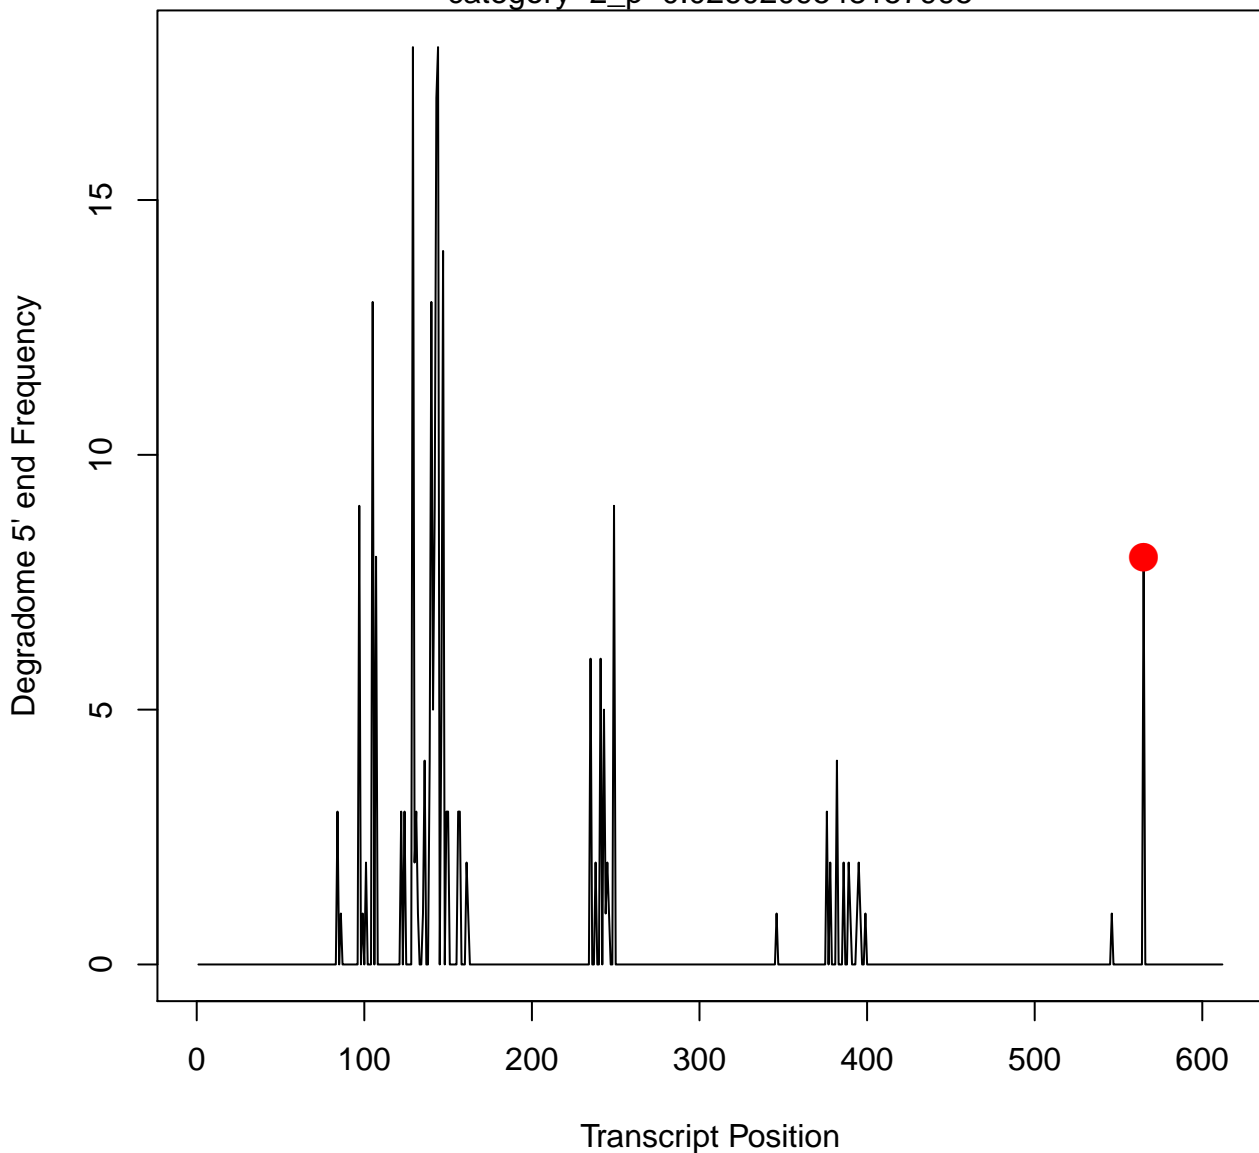

Supplement: Data_Sheet_1.zip [file Data_Sheet_1.zip]

**T=evm.model.LG07.1621\_Q=miR393b-5p\_S=171**

category=2\_p=0.0260209548157995

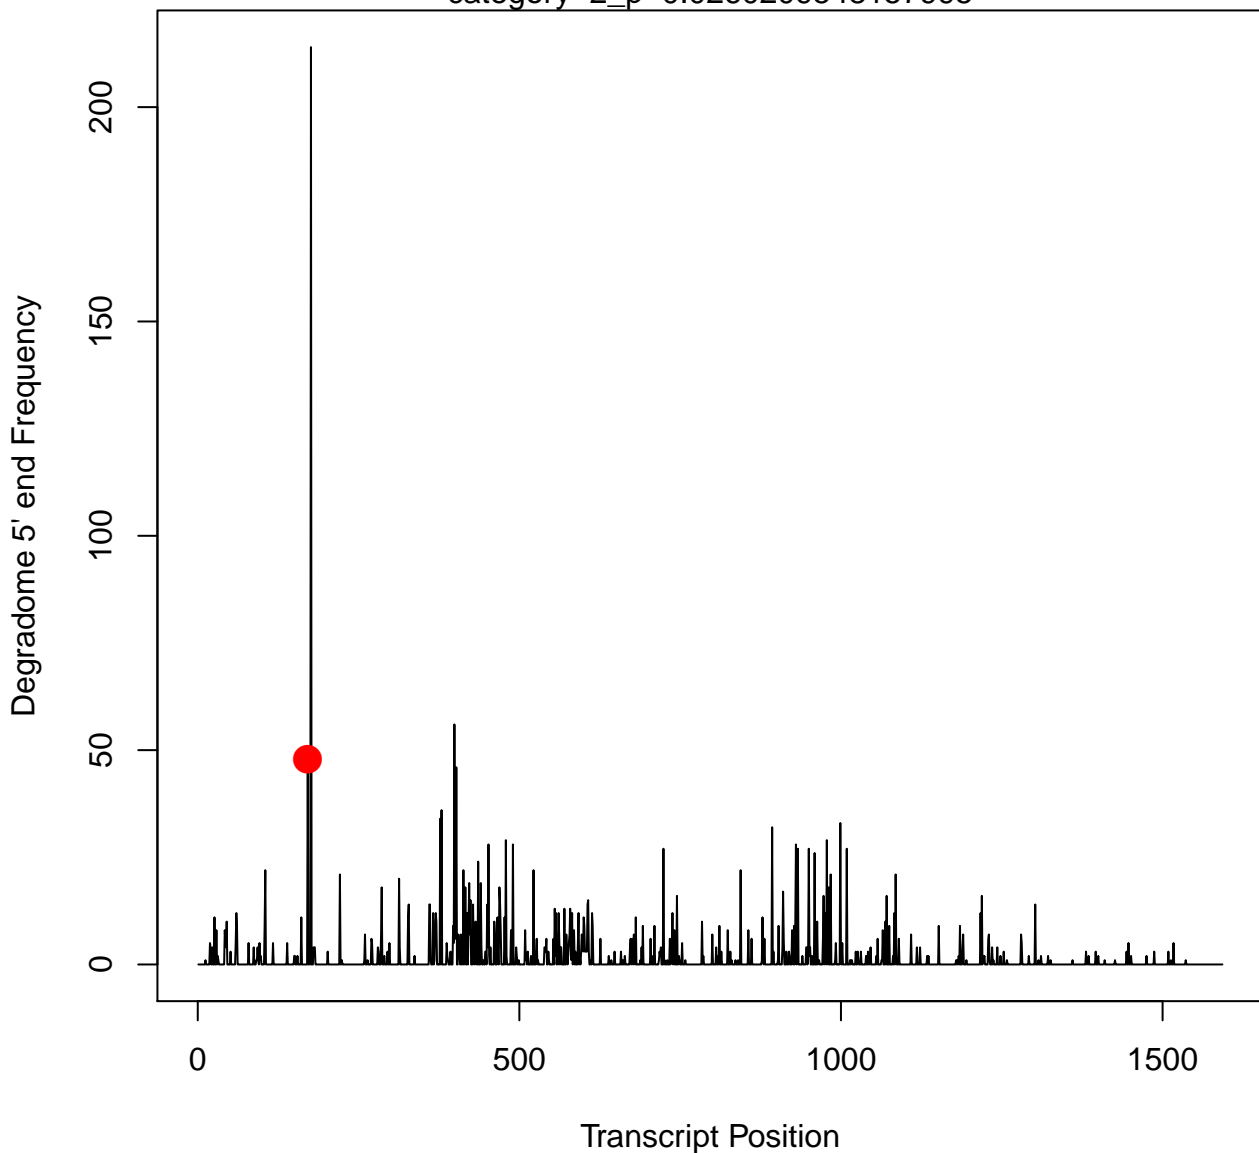

Supplement: Data_Sheet_1.zip [file Data_Sheet_1.zip]

**T=evm.model.LG01.6149\_Q=miR160c-5p\_S=1325**

category=0\_p=0.00207487934604456

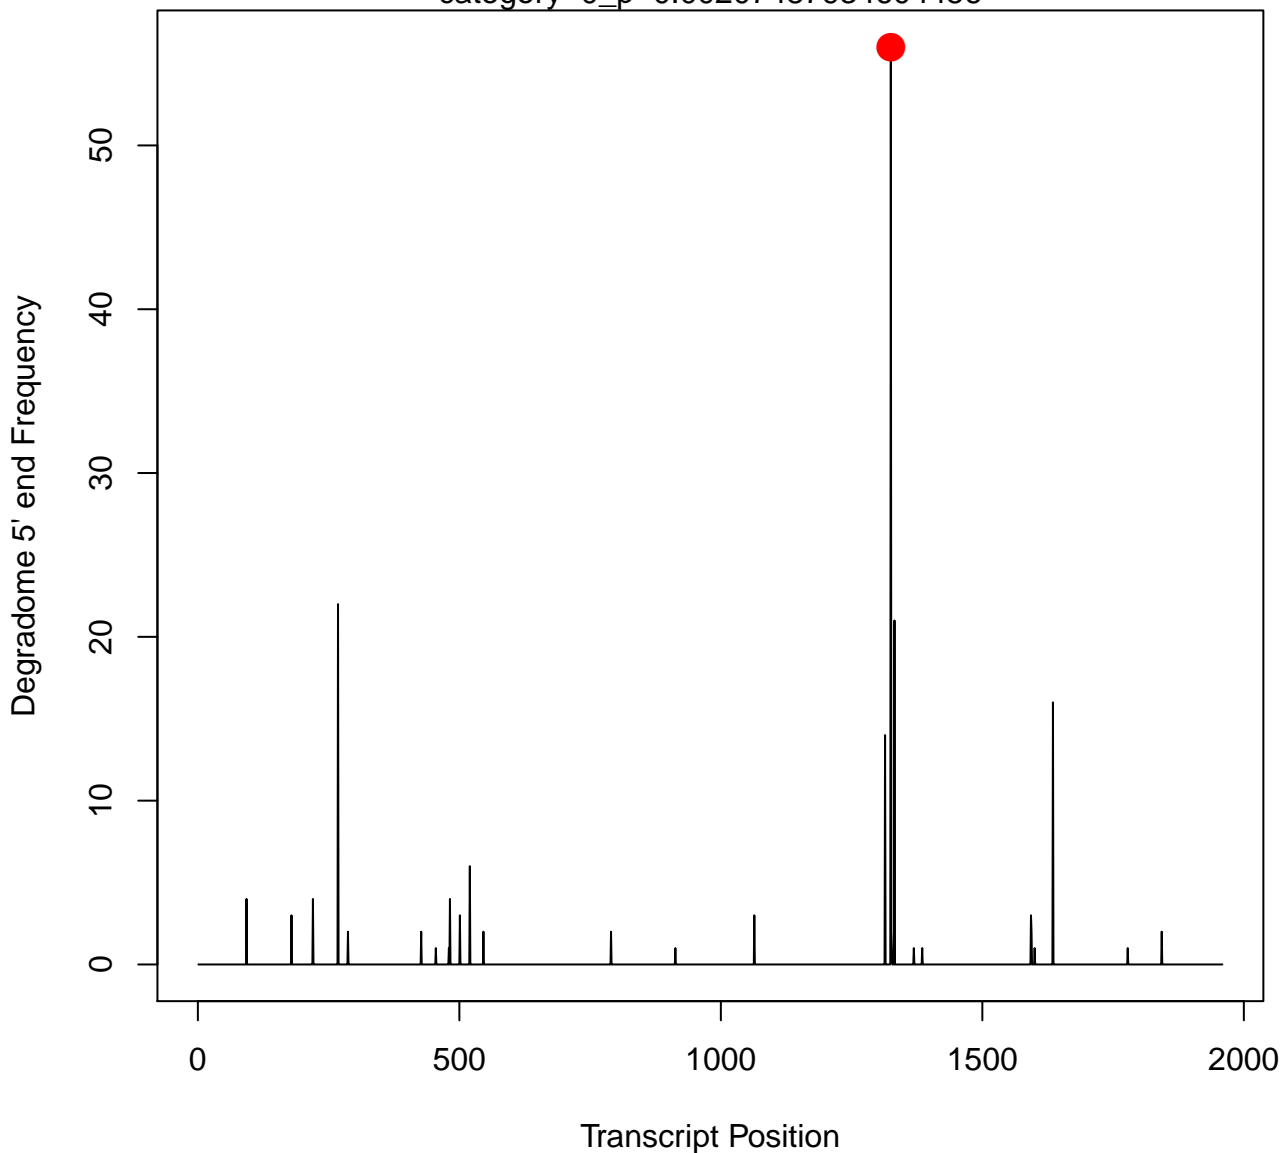

Supplement: Data_Sheet_1.zip [file Data_Sheet_1.zip]

**T=evm.model.LG02.6265\_Q=miR396a-5p\_S=644**

category=0\_p=0.00724326232736372

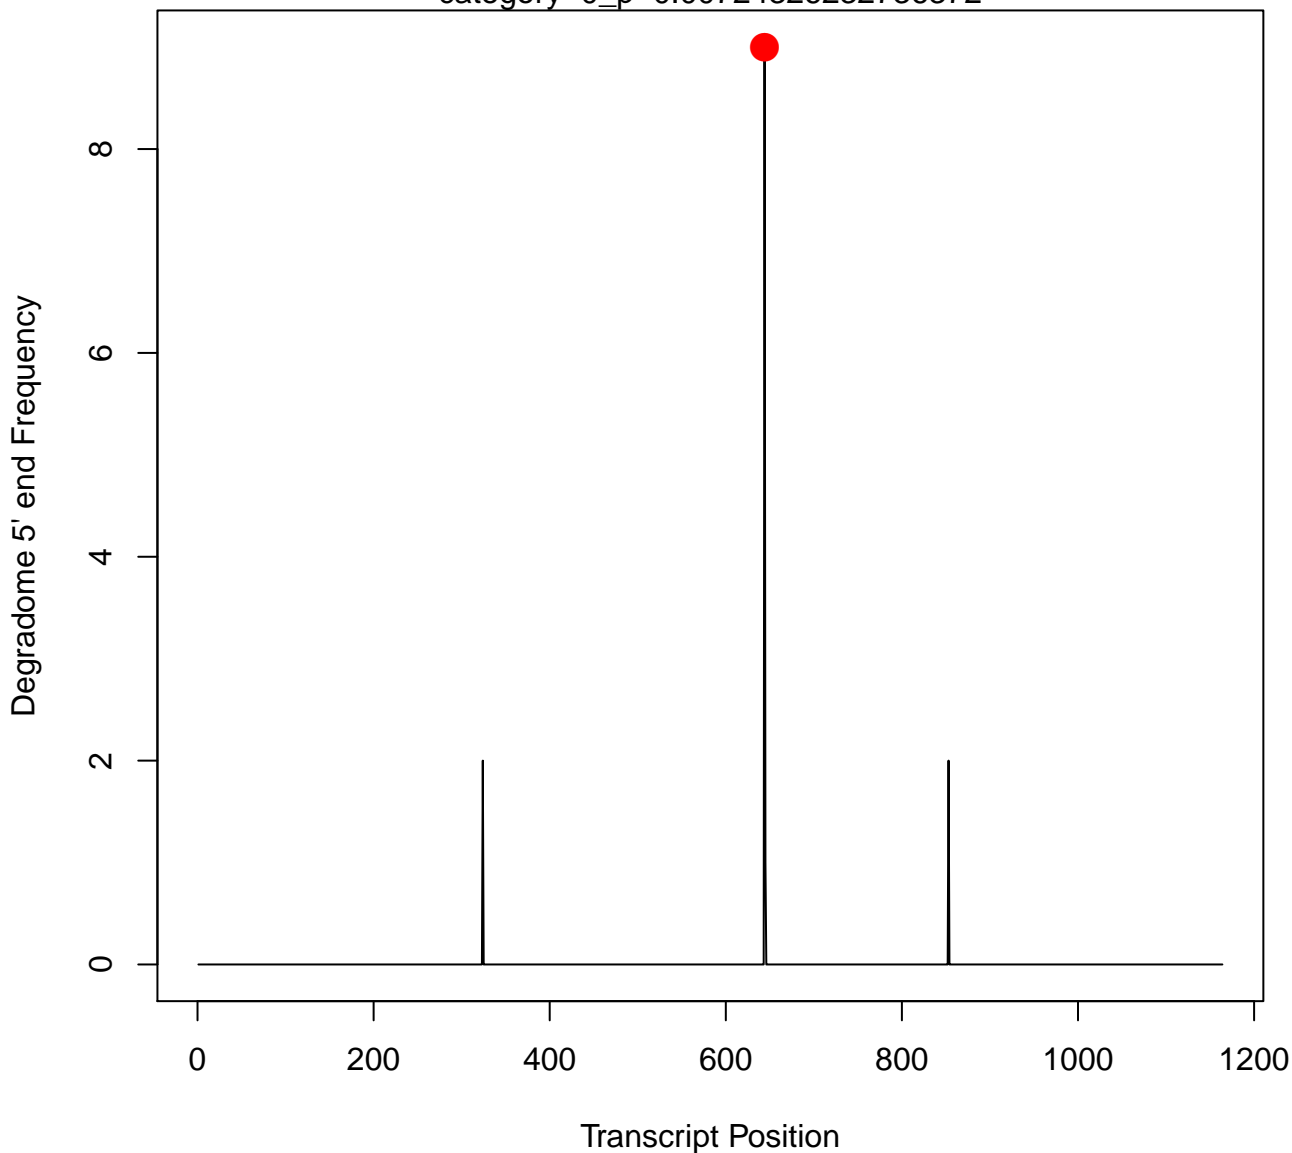

Supplement: Data_Sheet_1.zip [file Data_Sheet_1.zip]

**T=evm.model.LG04.3339\_Q=miRN11-5p\_S=1084**

category=2\_p=0.042990999752487

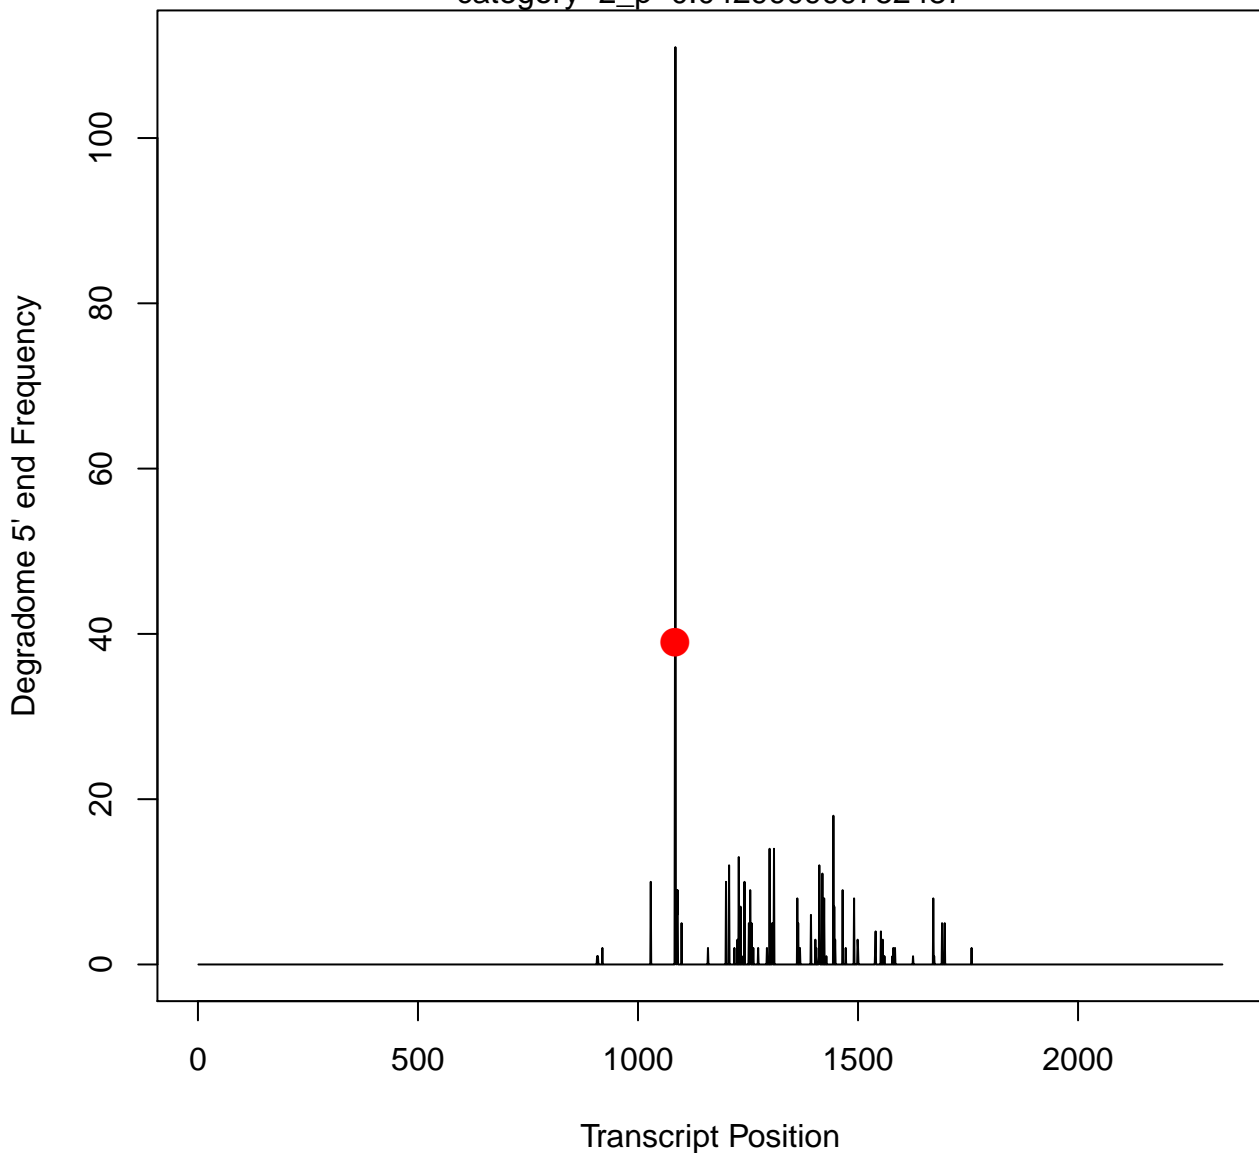

Supplement: Data_Sheet_1.zip [file Data_Sheet_1.zip]

**T=evm.model.LG08.1113\_Q=miRN3-5p\_S=62**

category=2\_p=0.0174234189334928

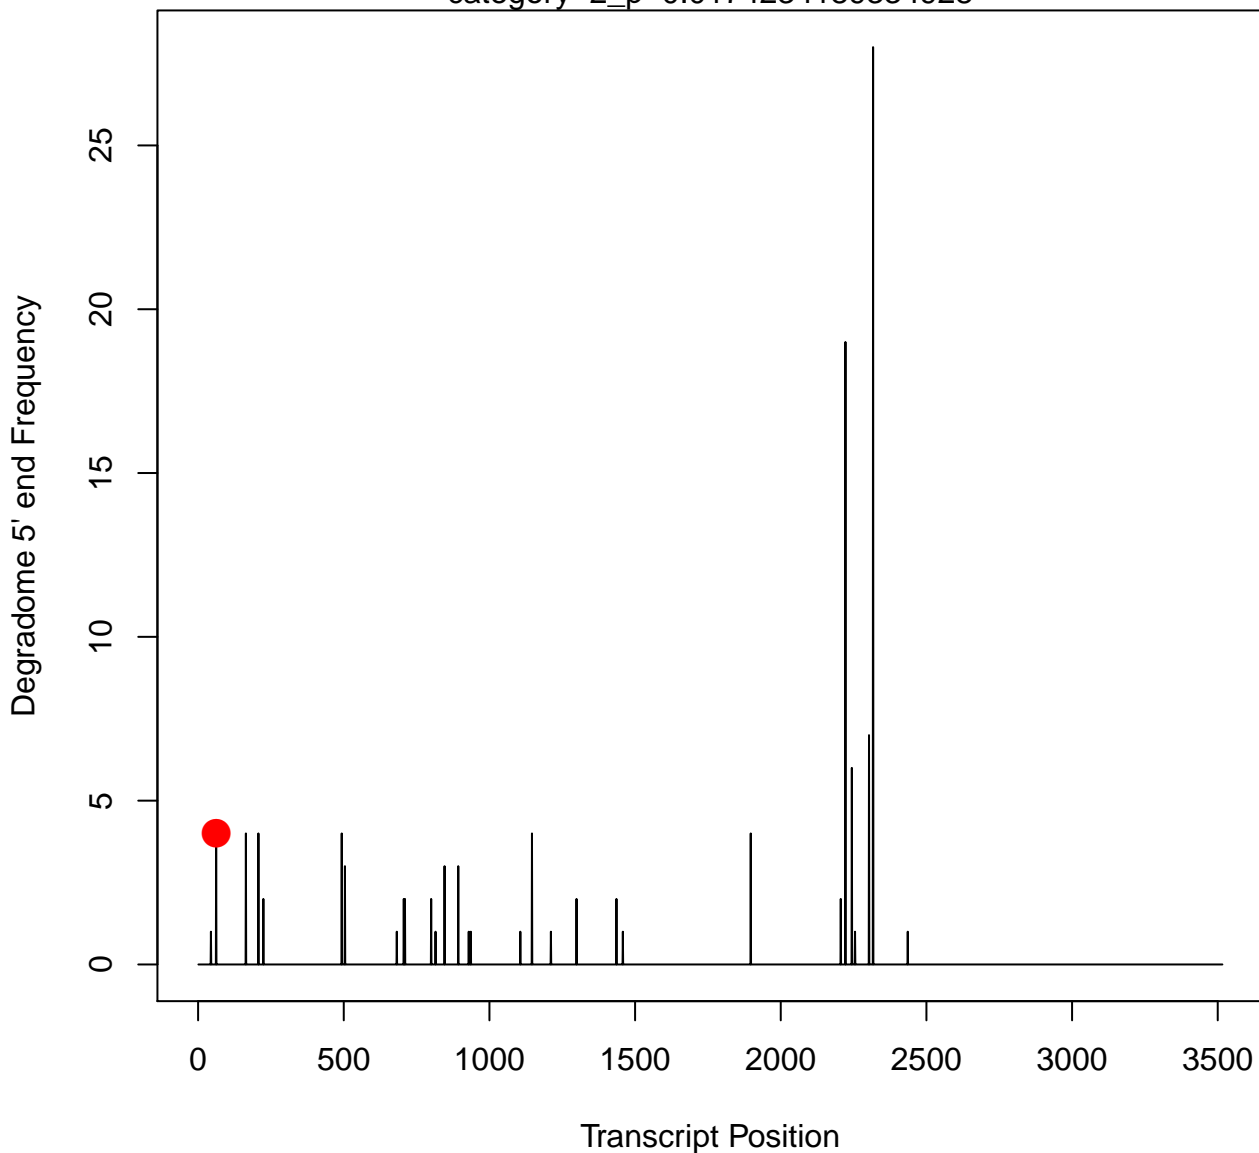

Supplement: Data_Sheet_1.zip [file Data_Sheet_1.zip]

**T=evm.model.LG06.2004\_Q=miR396d-5p\_S=572**

category=0\_p=0.00775862610766487

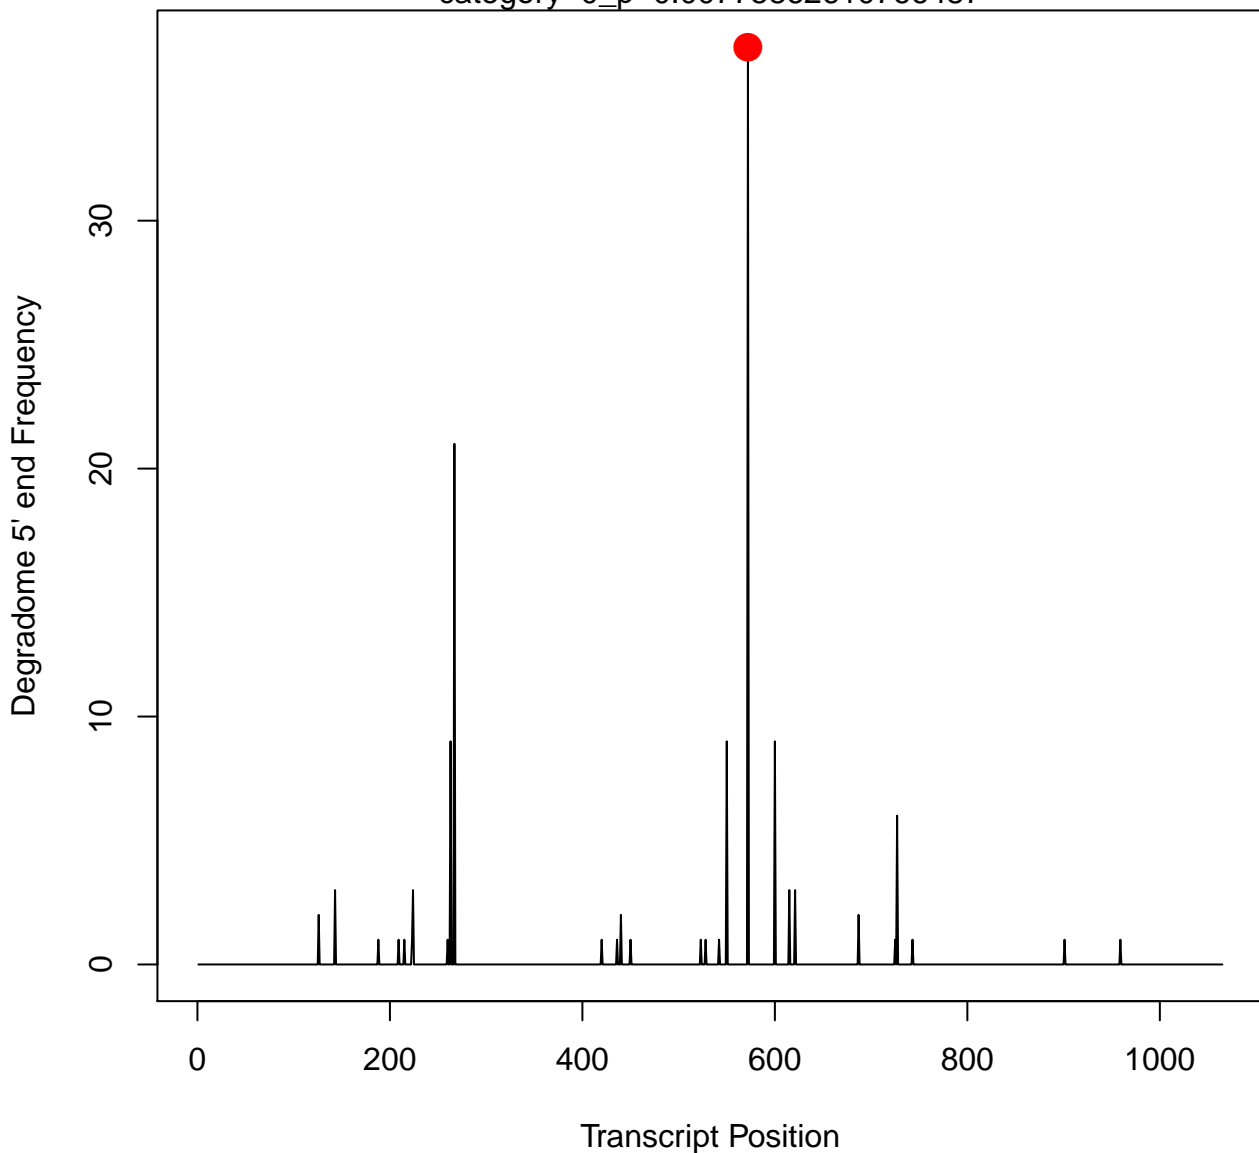

Supplement: Data_Sheet_1.zip [file Data_Sheet_1.zip]

**T=evm.model.LG06.3489\_Q=miRN27-3p\_S=992**

category=3\_p=0.0241449679652586

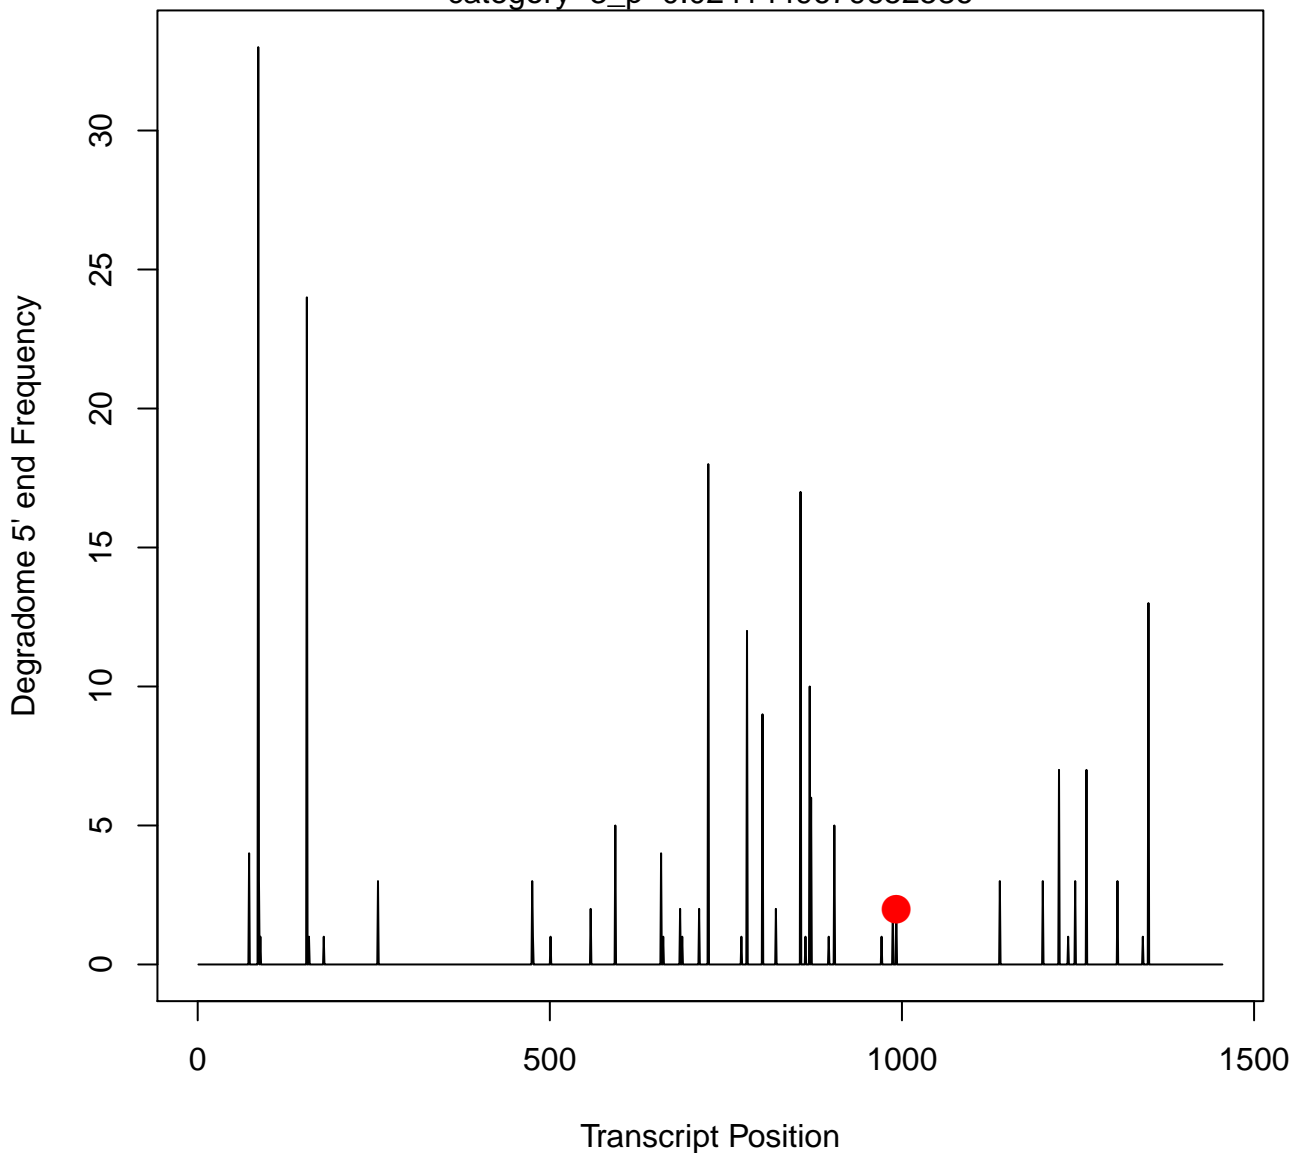

Supplement: Data_Sheet_1.zip [file Data_Sheet_1.zip]

**T=evm.model.LG02.6165\_Q=miRN4-5p\_S=70**

category=0\_p=0.00672763087043382

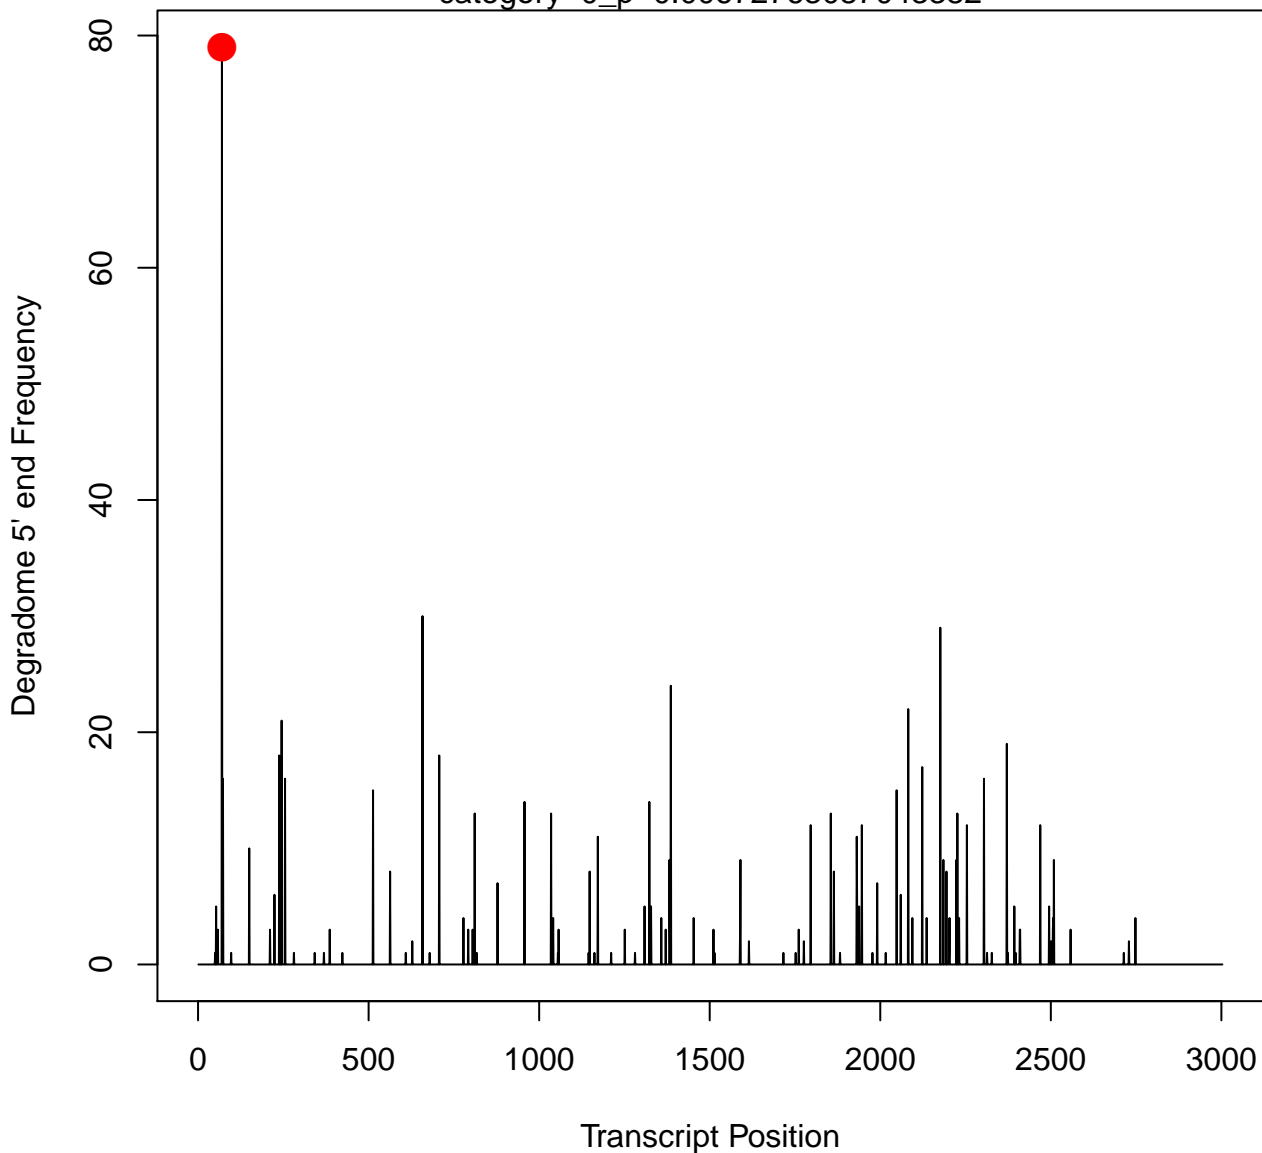

Supplement: Data_Sheet_1.zip [file Data_Sheet_1.zip]

**T=evm.model.LG02.1585\_Q=miR396d-5p\_S=1671**

category=0\_p=0.0159681557397247

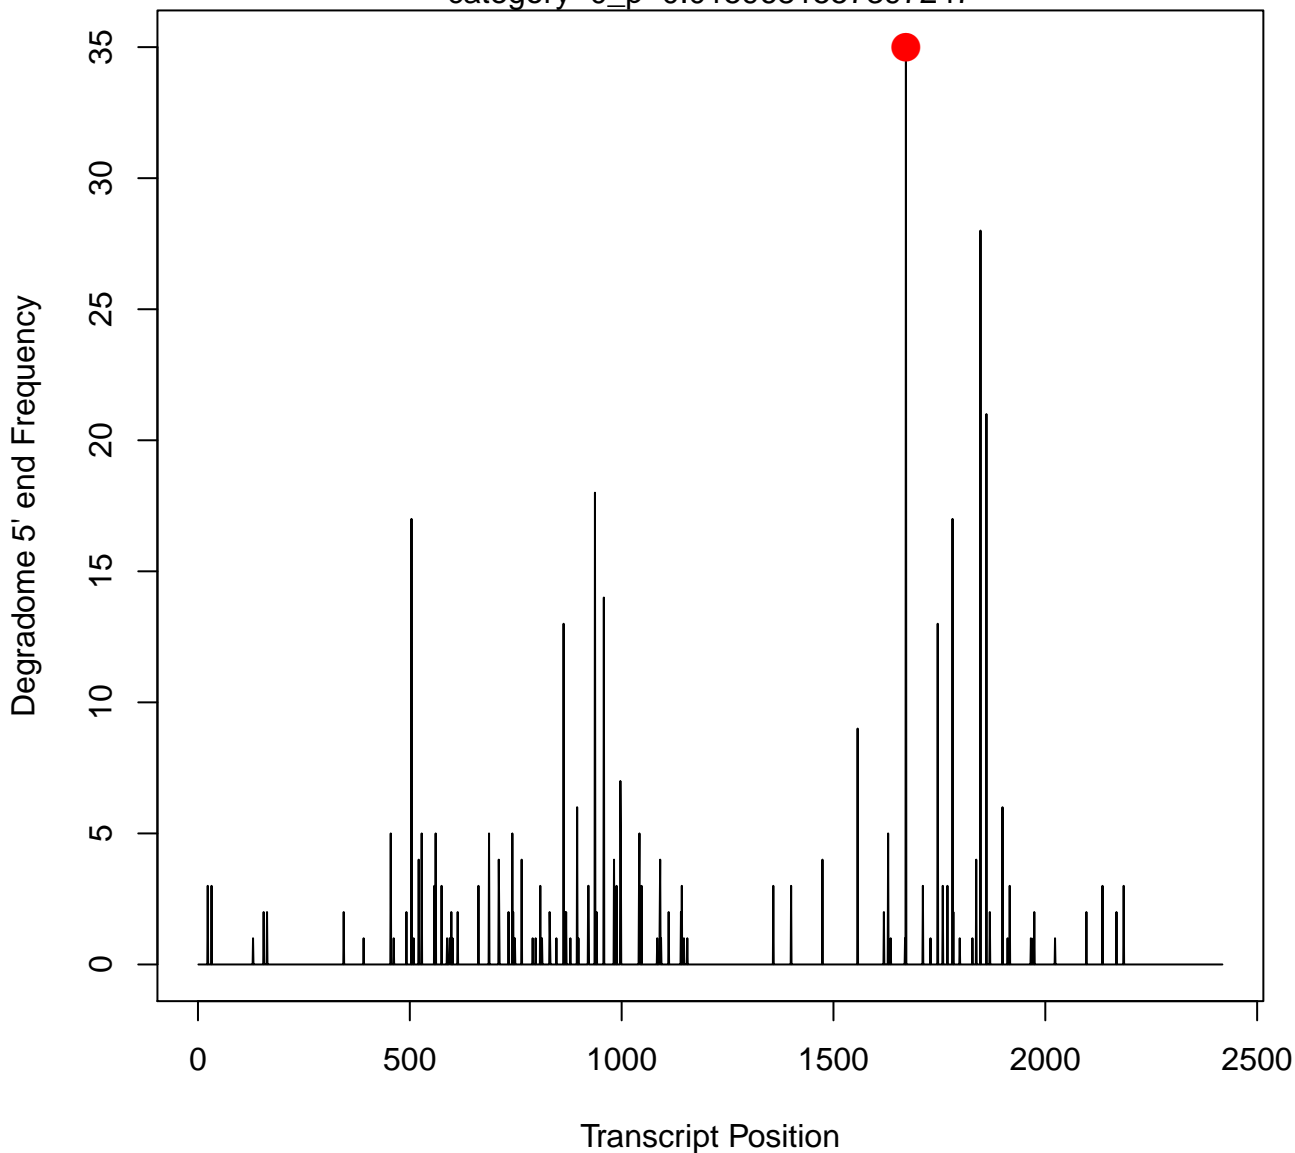

Supplement: Data_Sheet_1.zip [file Data_Sheet_1.zip]

**T=evm.model.LG06.4121\_Q=miR390b-5p\_S=909**

category=2\_p=0.042990999752487

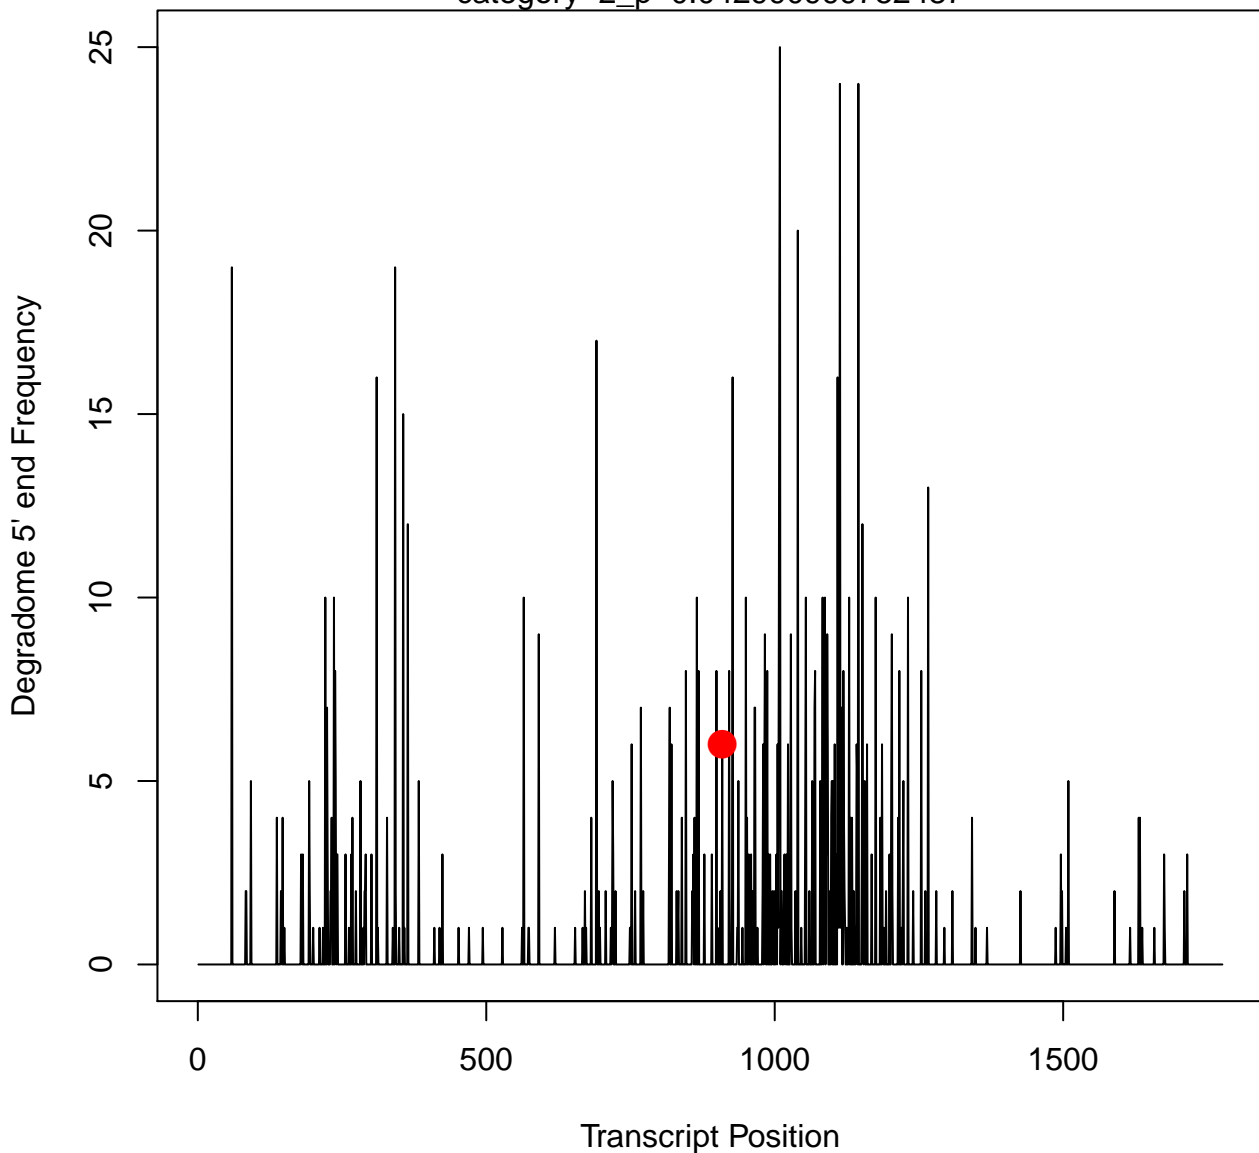

Supplement: Data_Sheet_1.zip [file Data_Sheet_1.zip]

**T=evm.model.LG03.2927\_Q=miR396a-5p\_S=377**

category=0\_p=0.00775862610766487

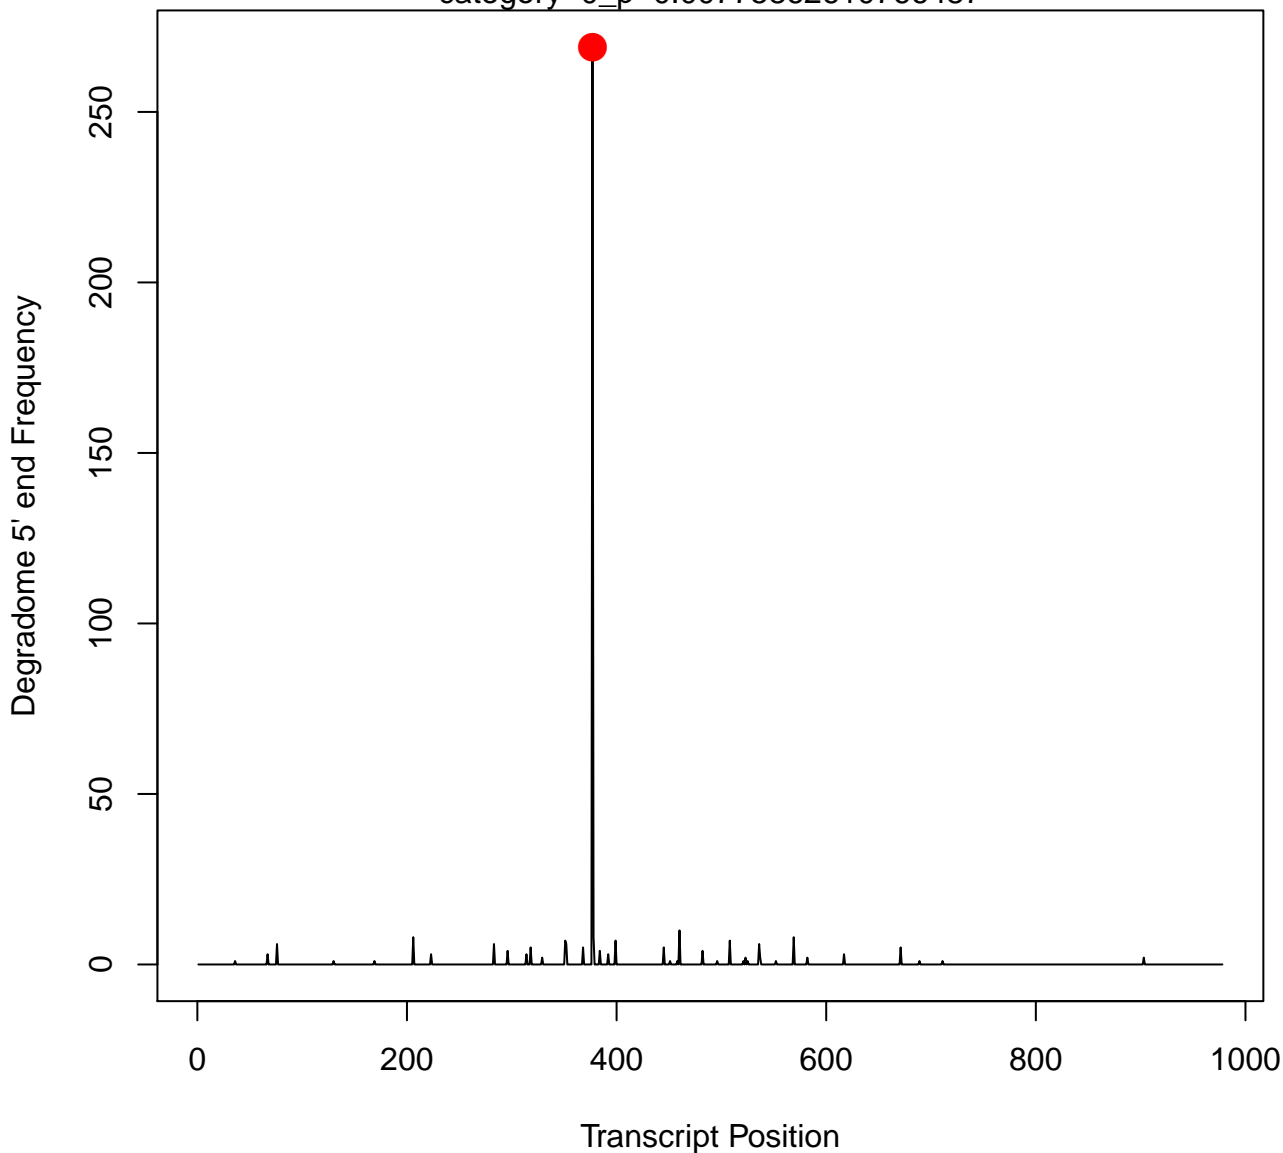

Supplement: Data_Sheet_1.zip [file Data_Sheet_1.zip]

**T=evm.model.LG06.509\_Q=miR164b-5p\_S=655**

category=2\_p=0.0345432623396535

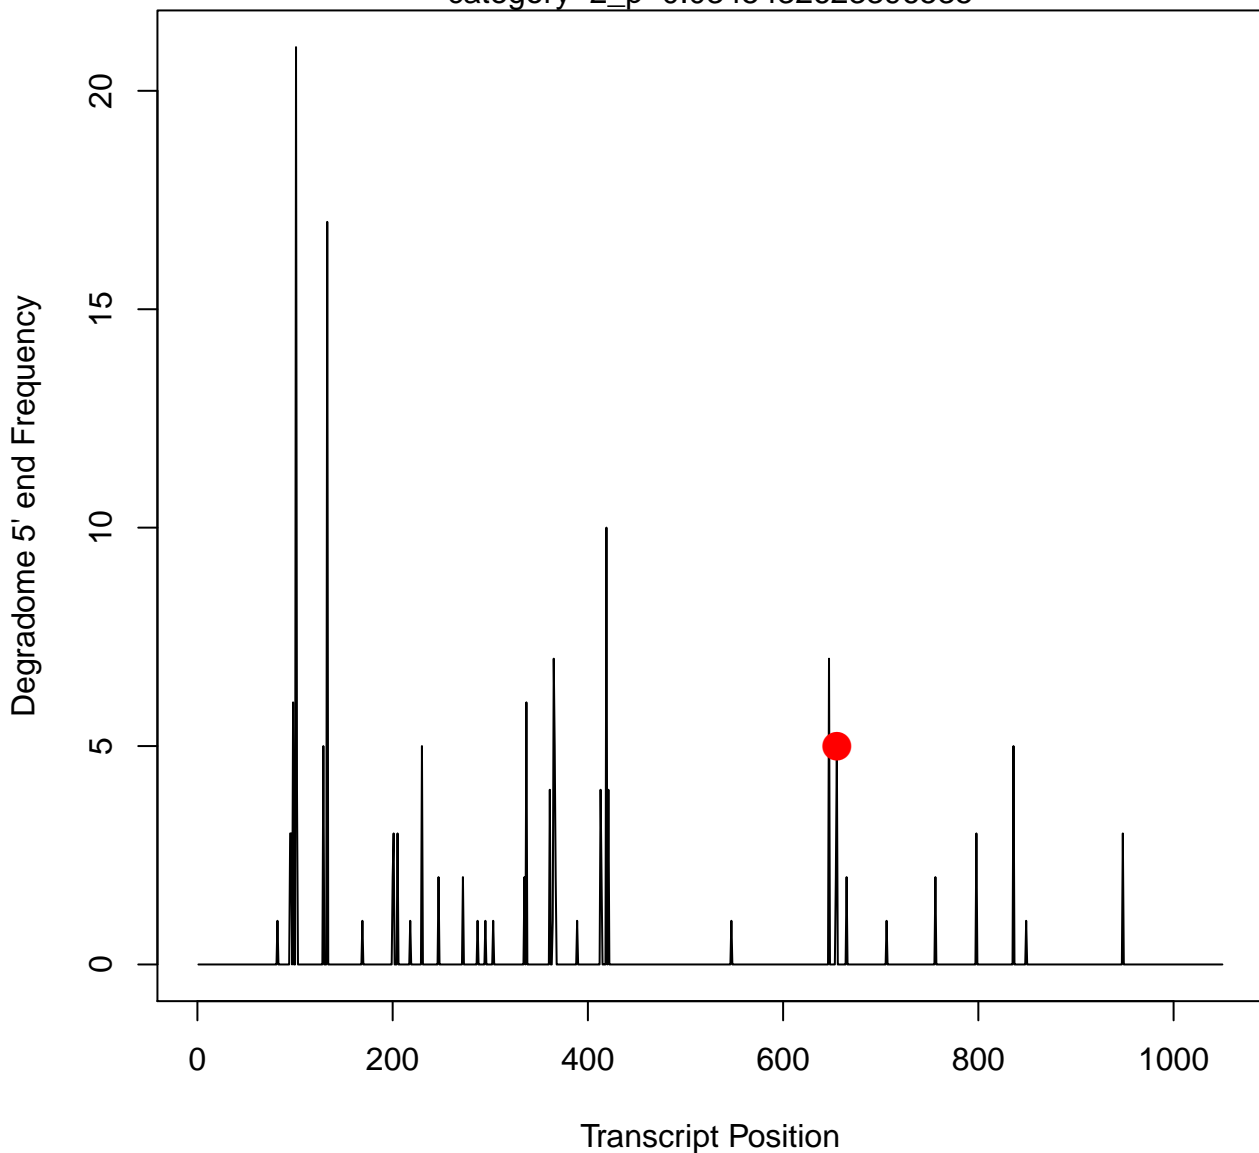

Supplement: Data_Sheet_1.zip [file Data_Sheet_1.zip]

**T=evm.model.LG03.5350\_Q=miR395g-5p\_S=395**

category=2\_p=0.0174234189334928

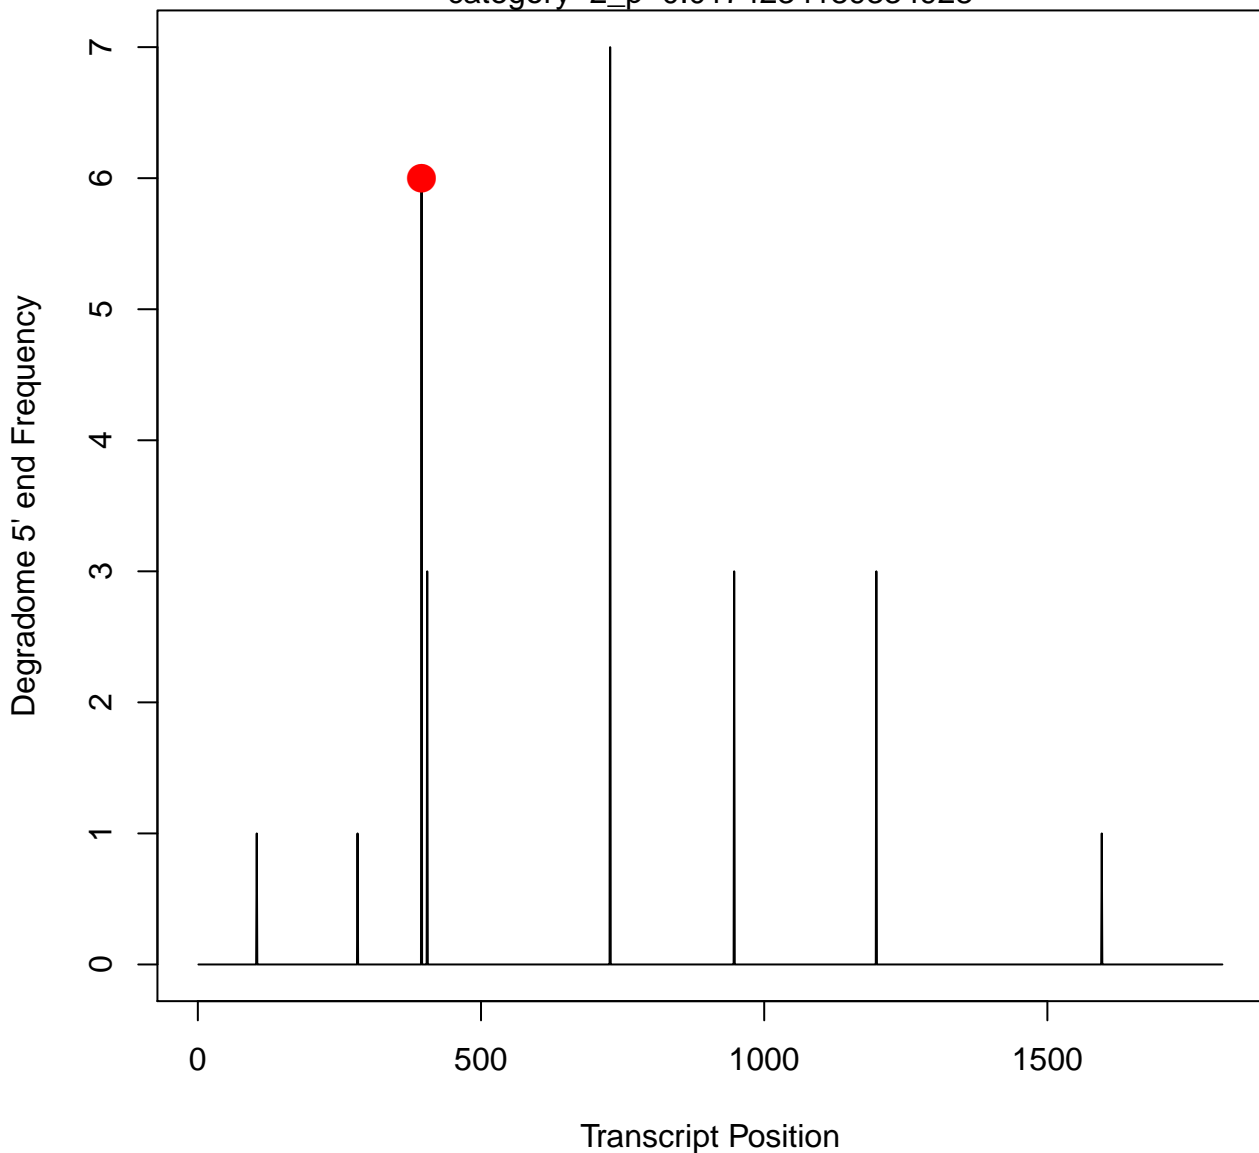

Supplement: Data_Sheet_1.zip [file Data_Sheet_1.zip]

**T=evm.model.LG07.3497\_Q=miR166a-3p\_S=547**

category=0\_p=0.00051912393111464

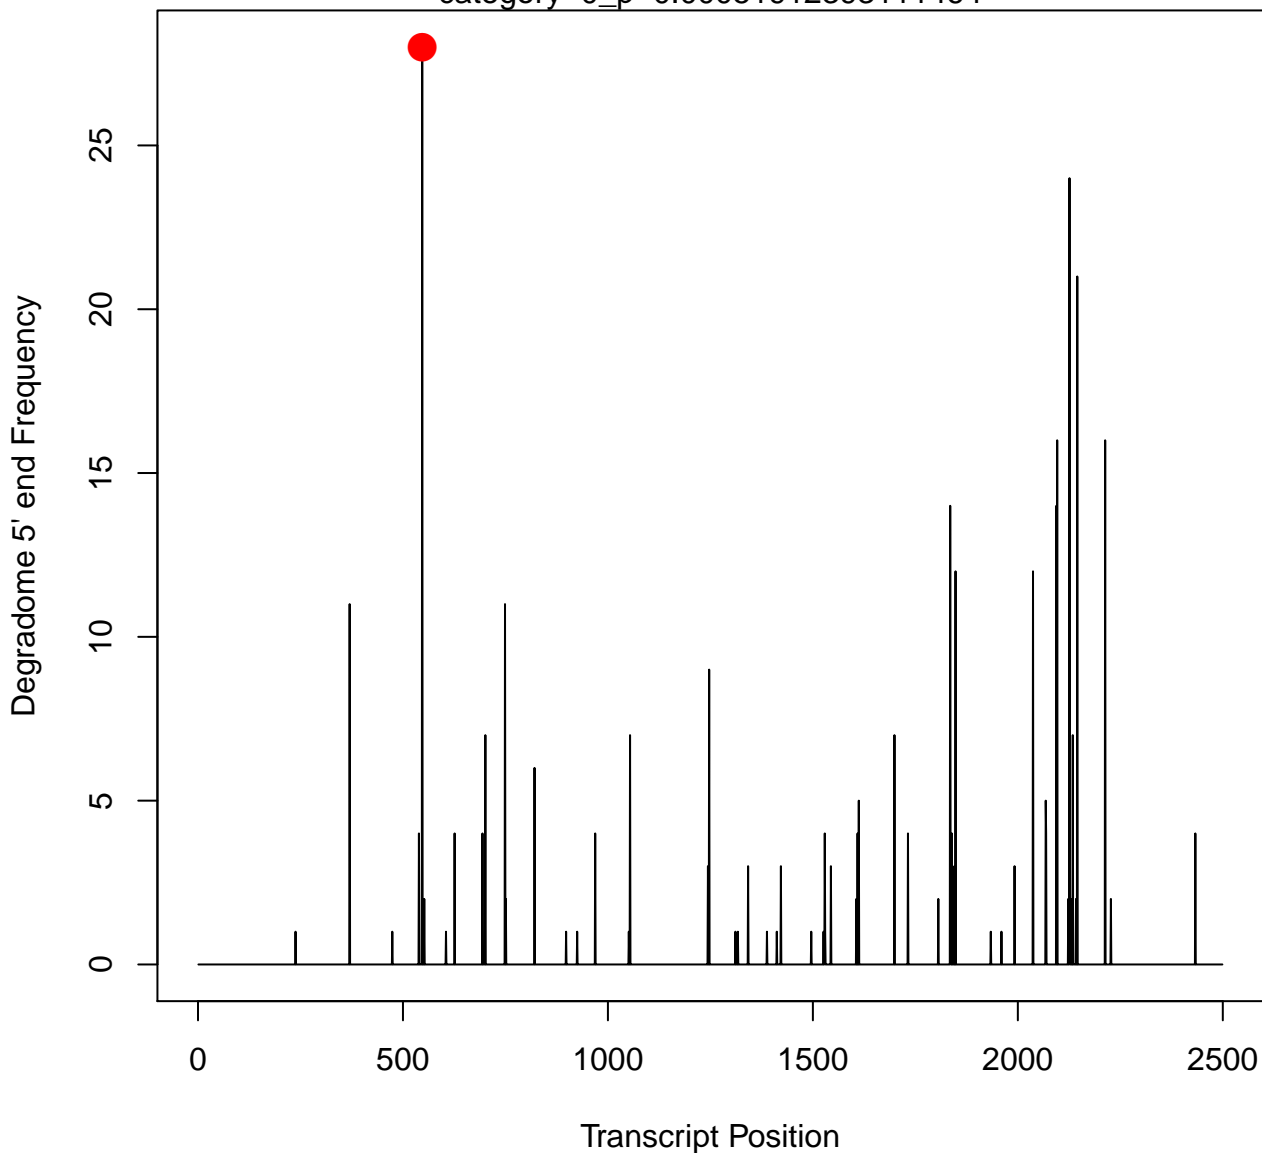

Supplement: Data_Sheet_1.zip [file Data_Sheet_1.zip]

**T=evm.model.LG08.1593\_Q=miRN27-3p\_S=701**

category=0\_p=0.00466242549475071

Degradsome 5' end Frequency

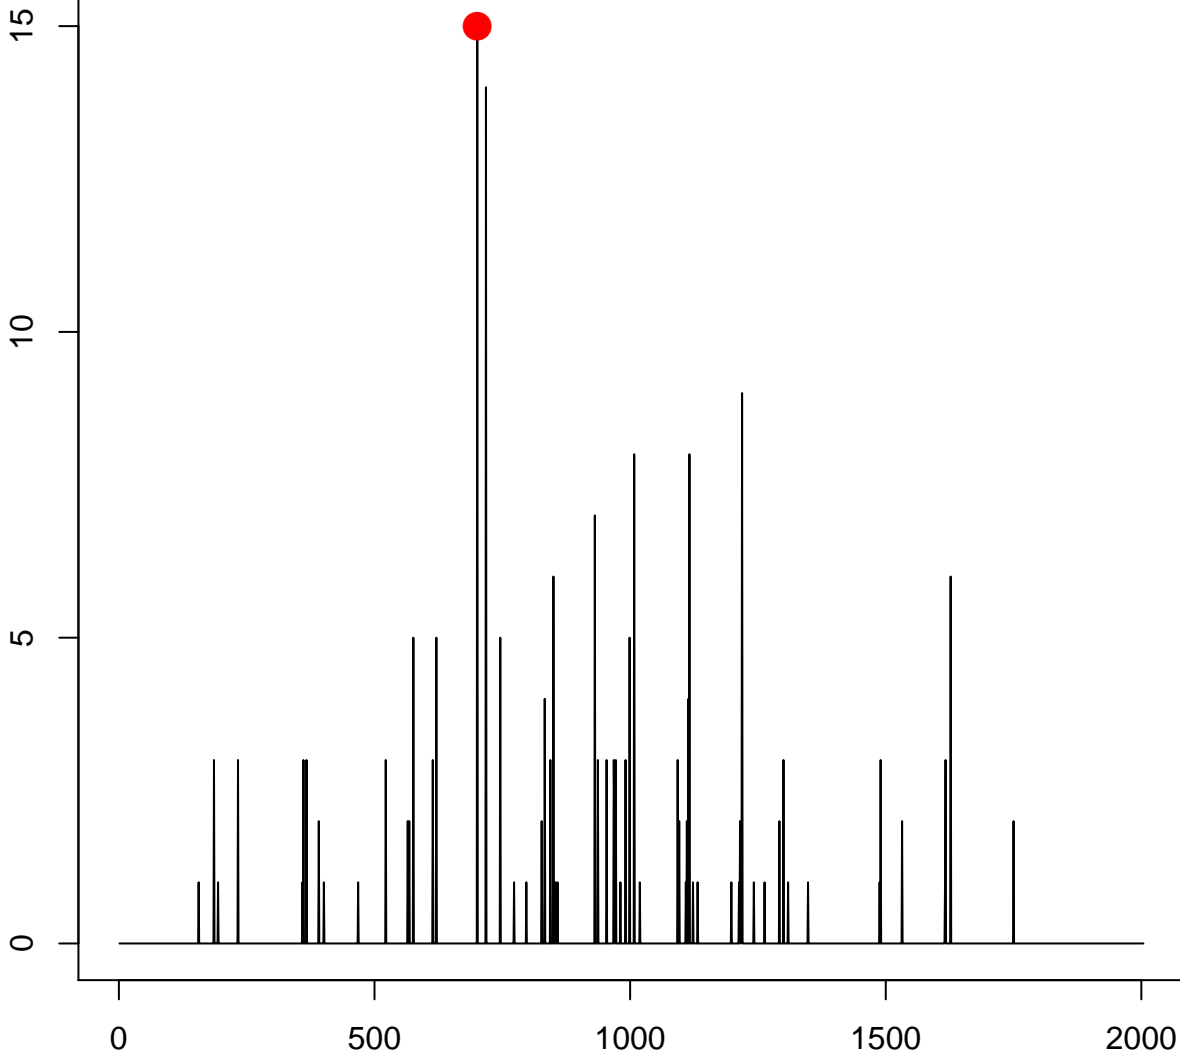

Transcript Position

Supplement: Data_Sheet_1.zip [file Data_Sheet_1.zip]

**T=evm.model.LG02.3374\_Q=miR159b-3p\_S=859**

category=0\_p=0.00103797837257324

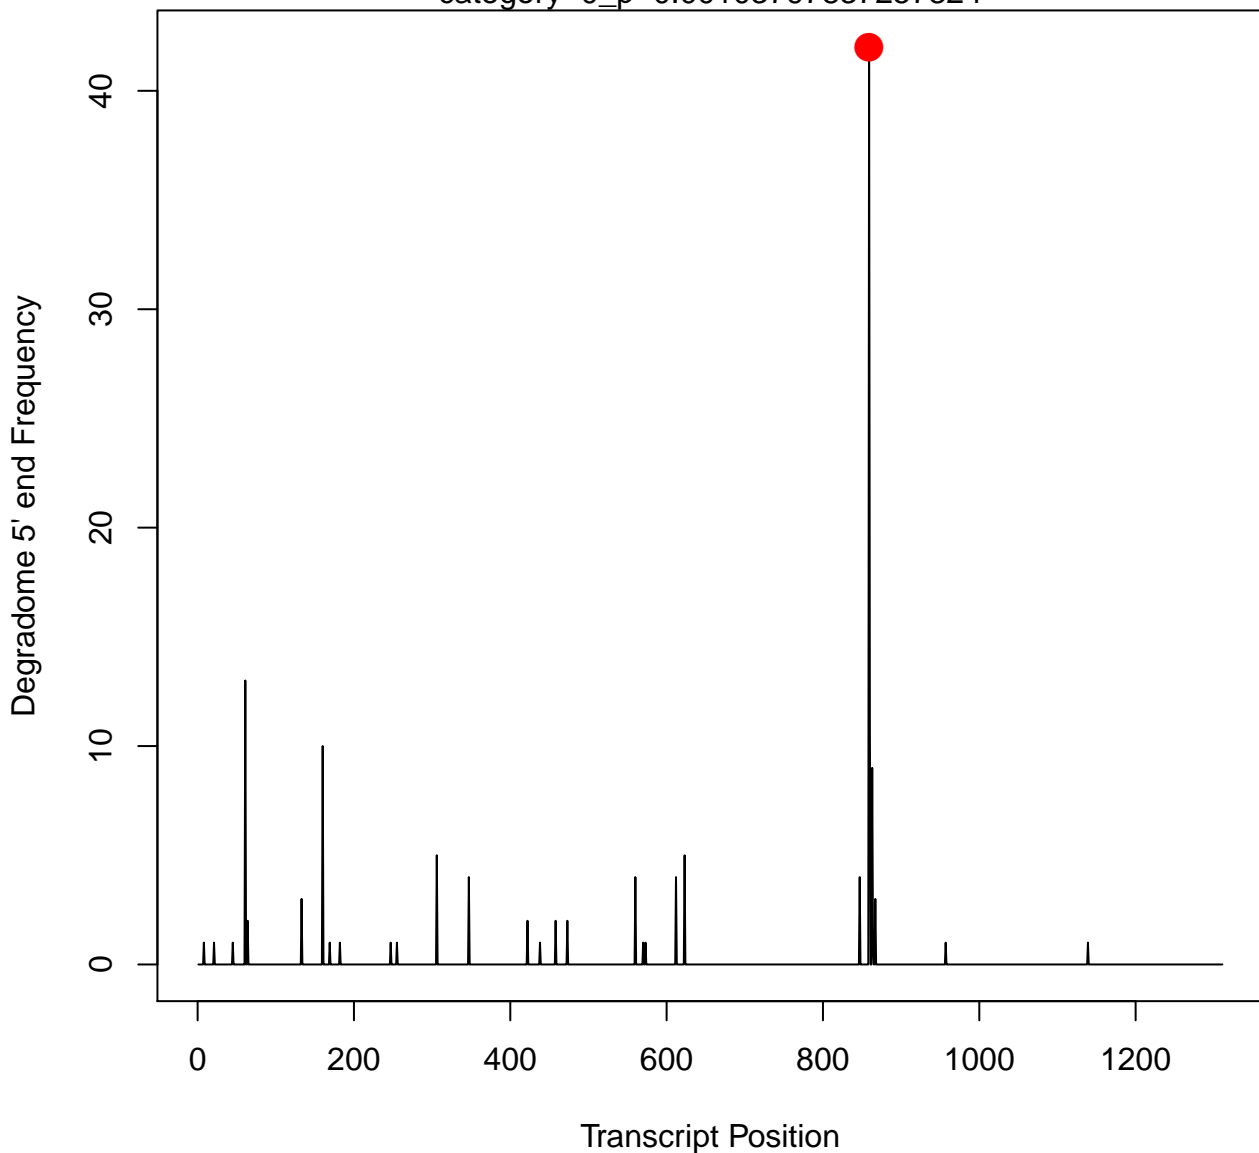

Supplement: Data_Sheet_1.zip [file Data_Sheet_1.zip]

**T=evm.model.LG05.3790\_Q=miR396d-5p\_S=527**

category=4\_p=0.0423765939260693

Degradome 5' end Frequency

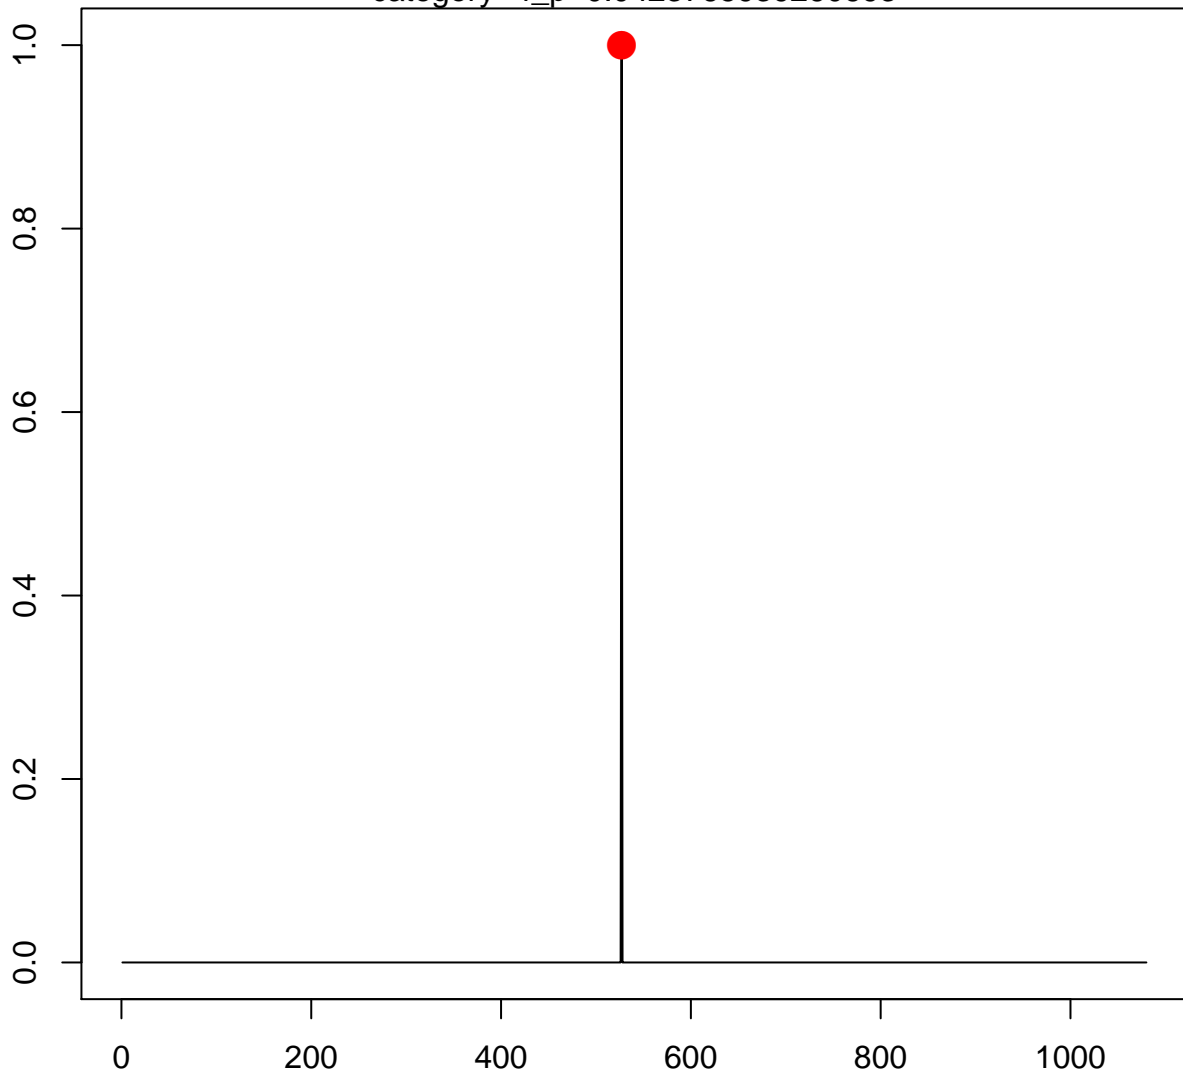

Transcript Position

Supplement: Data_Sheet_1.zip [file Data_Sheet_1.zip]

**T=evm.model.Contig1.87\_Q=miRN14-5p\_S=446**

category=3\_p=0.0477069564524738

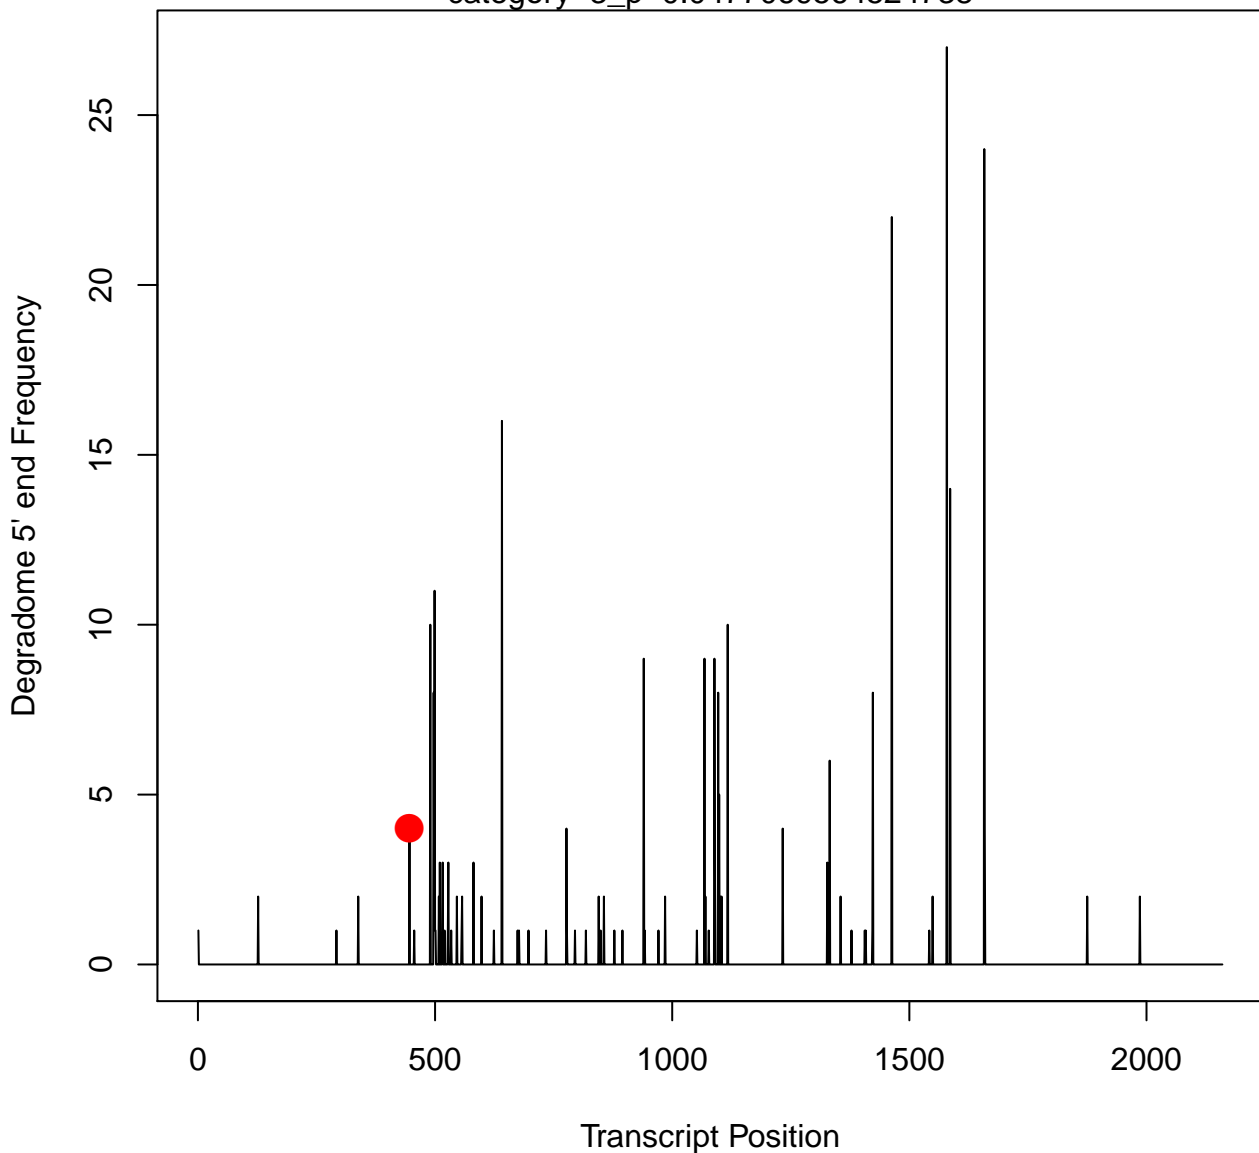

Supplement: Data_Sheet_1.zip [file Data_Sheet_1.zip]

**T=evm.model.LG03.51\_Q=miRN5-3p\_S=656**

category=3\_p=0.0477069564524738

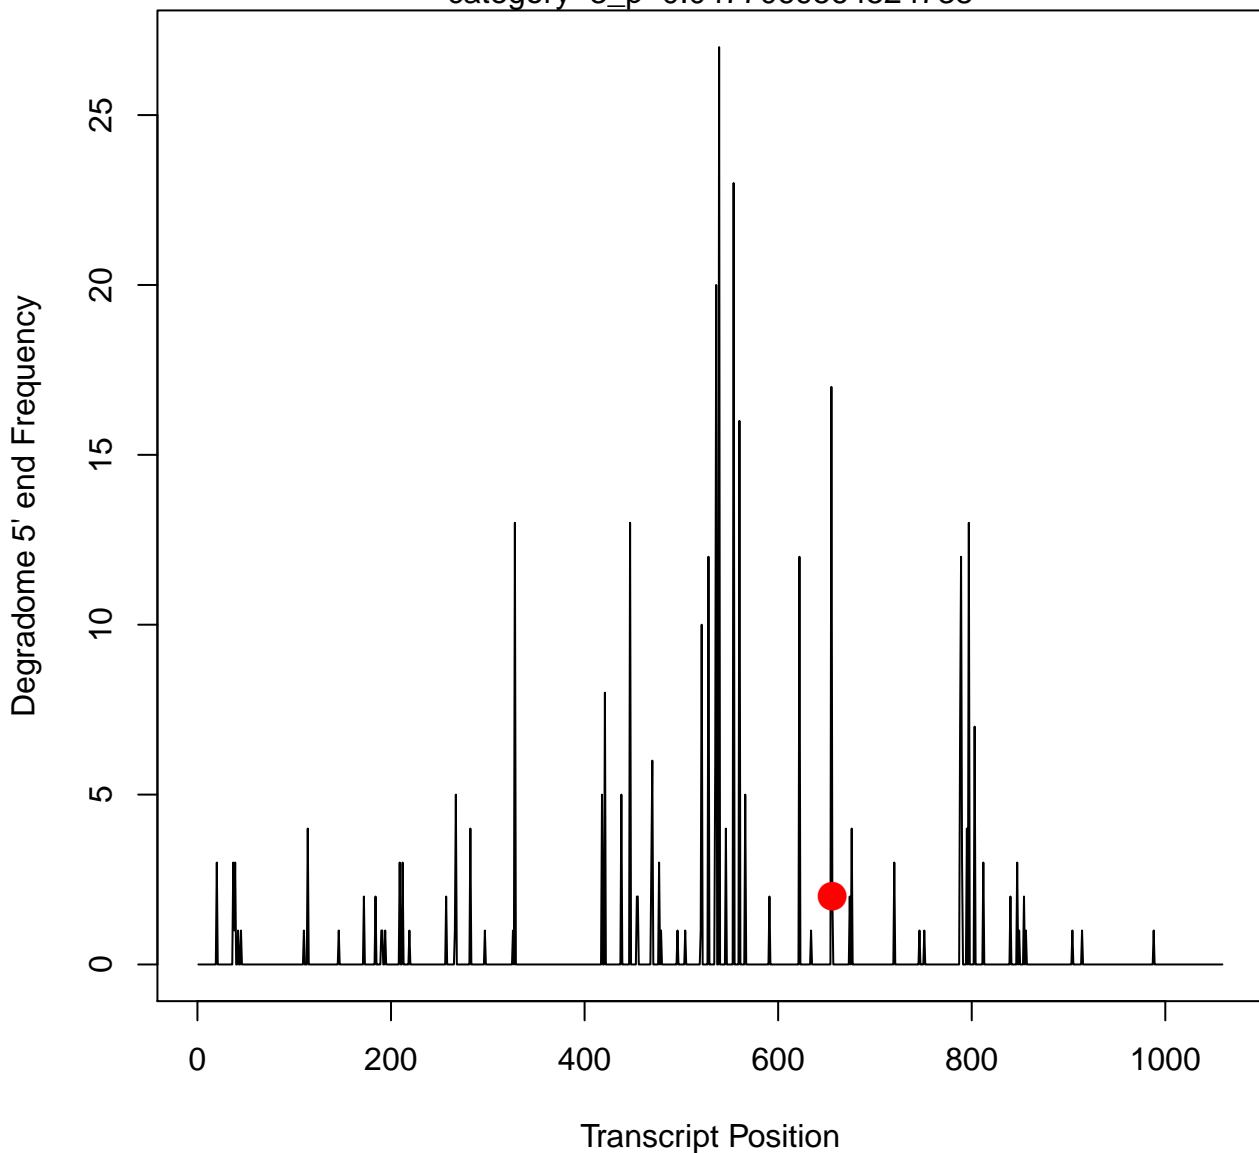

Supplement: Data_Sheet_1.zip [file Data_Sheet_1.zip]

**T=evm.model.LG08.2054\_Q=miR166b-5p\_S=436**

category=2\_p=0.0174234189334928

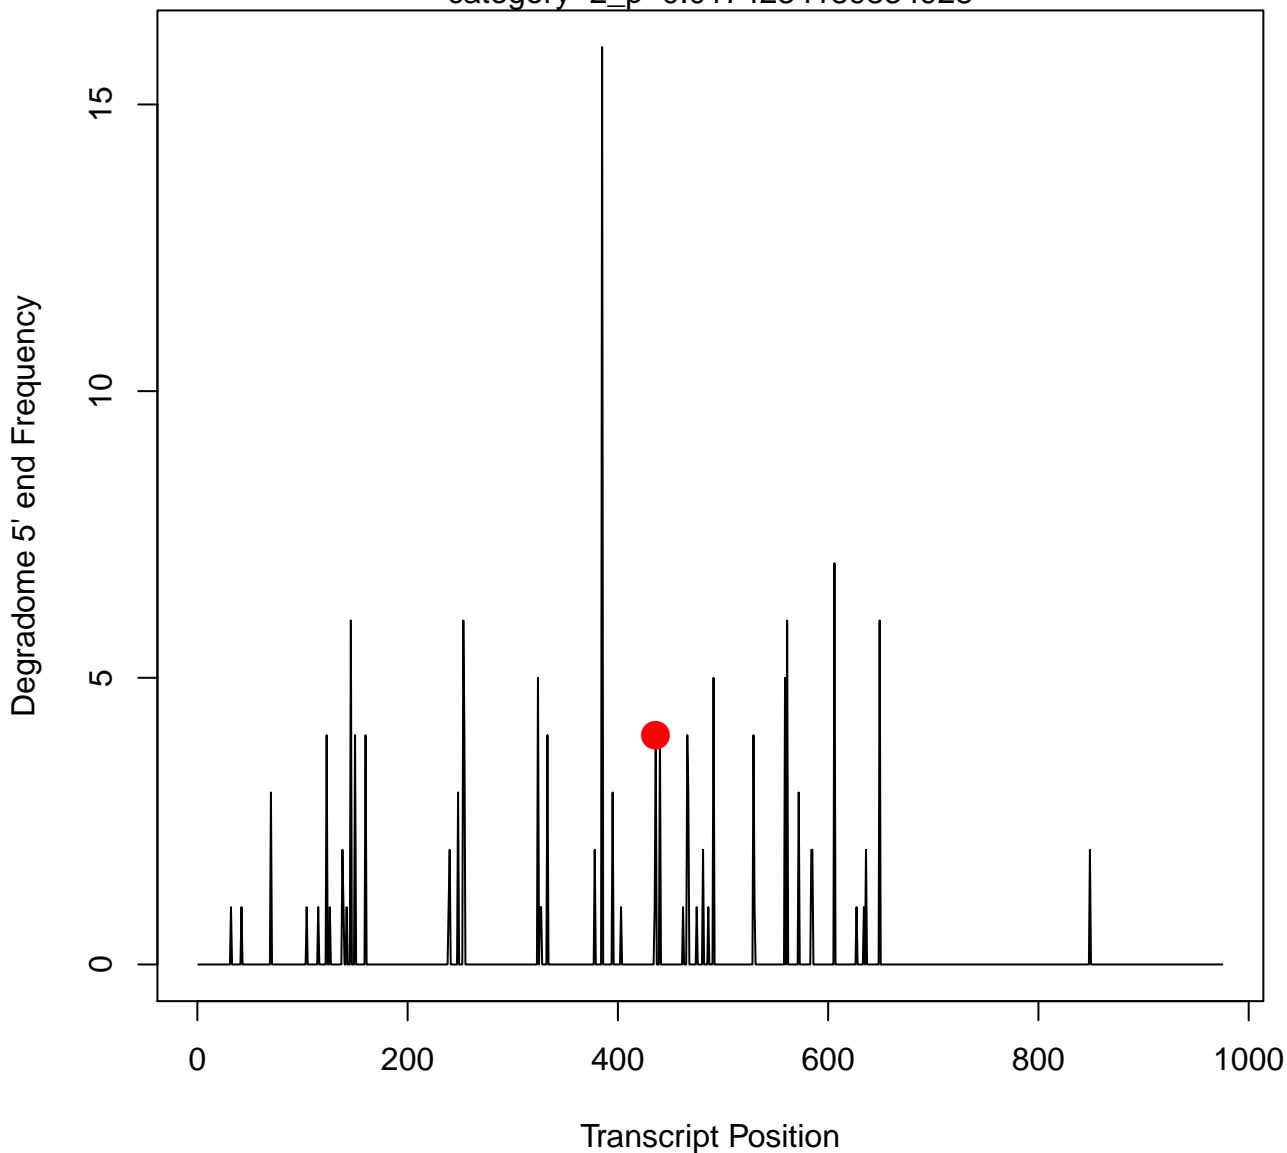

Supplement: Data_Sheet_1.zip [file Data_Sheet_1.zip]

**T=evm.model.LG03.4917\_Q=miR319d-3p\_S=1118**

category=4\_p=0.0423765939260693

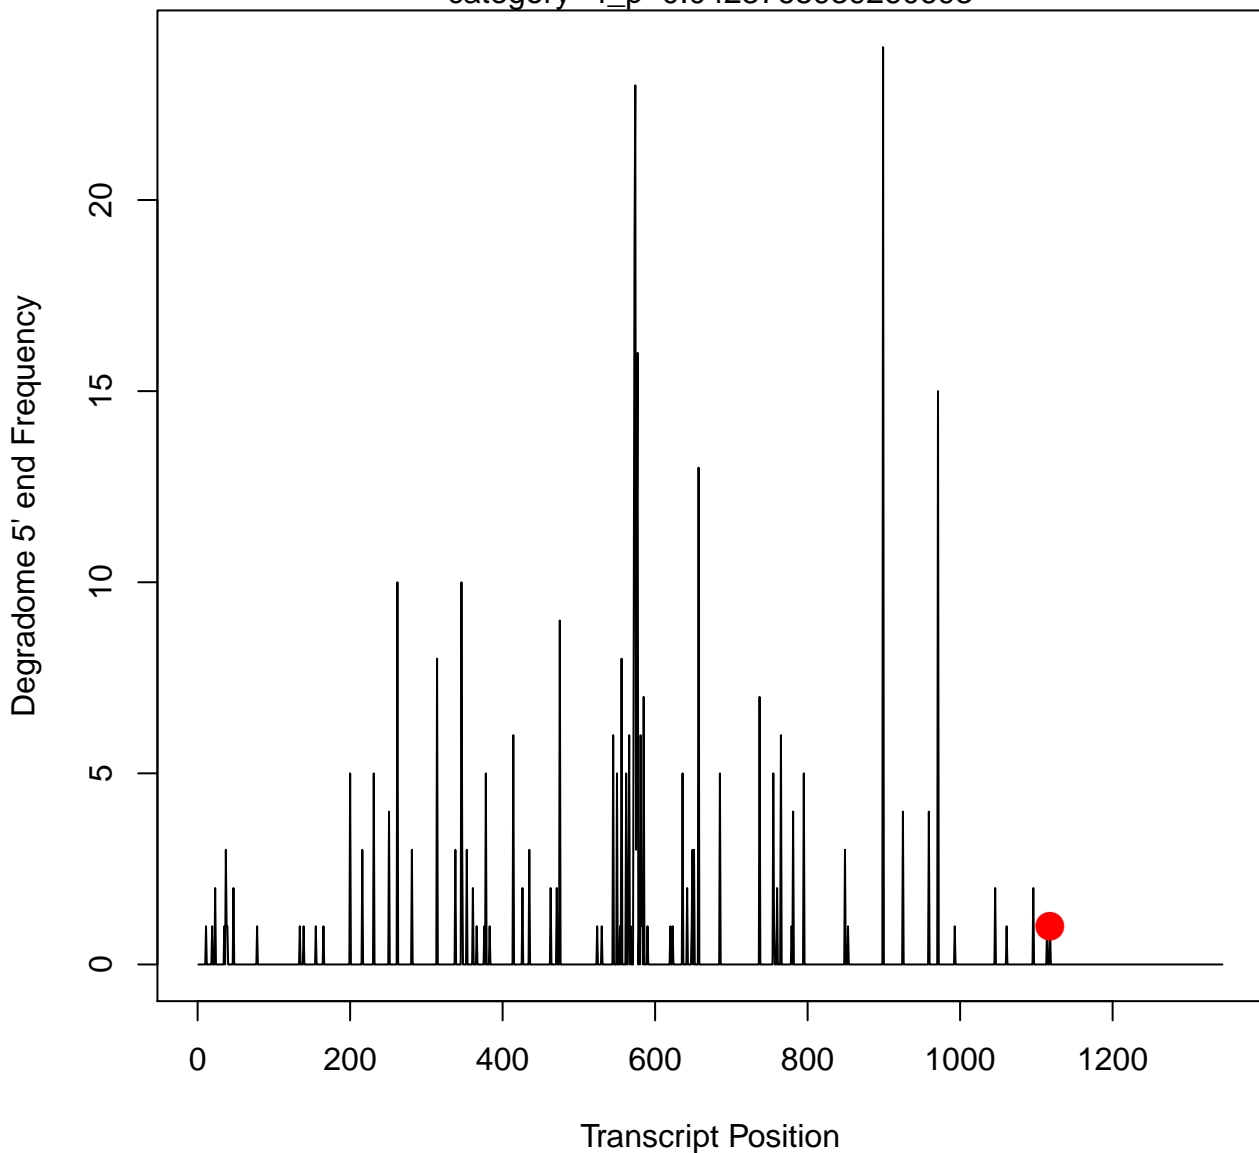

Supplement: Data_Sheet_1.zip [file Data_Sheet_1.zip]

**T=evm.model.LG06.2304\_Q=miRN19b-5p\_S=640**

category=2\_p=0.0174234189334928

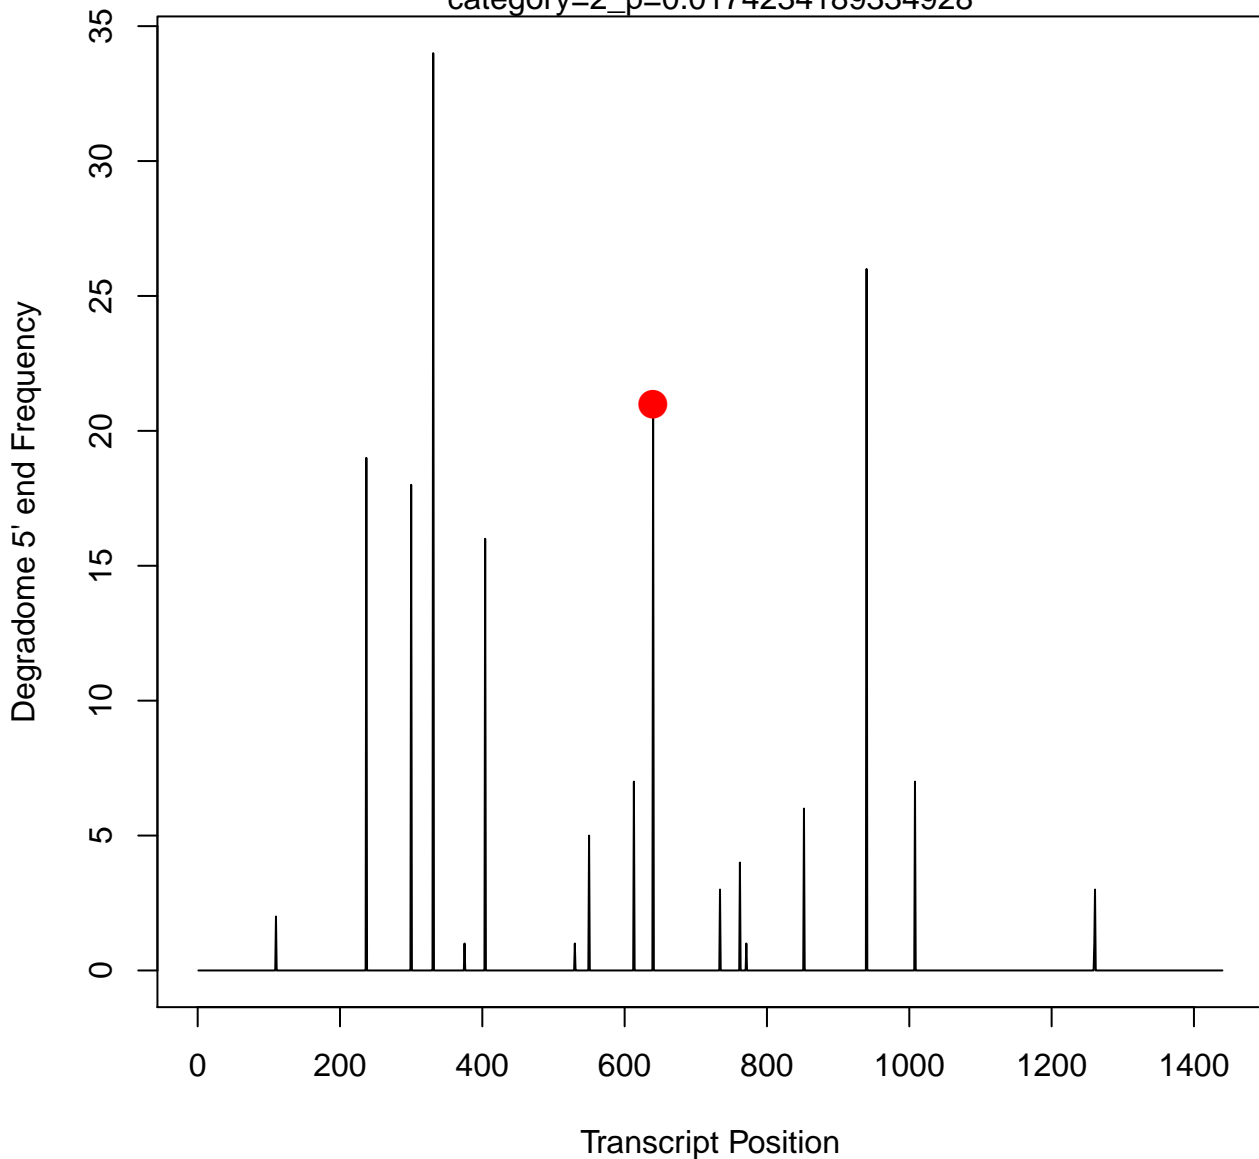

Supplement: Data_Sheet_1.zip [file Data_Sheet_1.zip]

**T=evm.model.LG03.1086\_Q=miR171c-3p\_S=488**

category=2\_p=0.0174234189334928

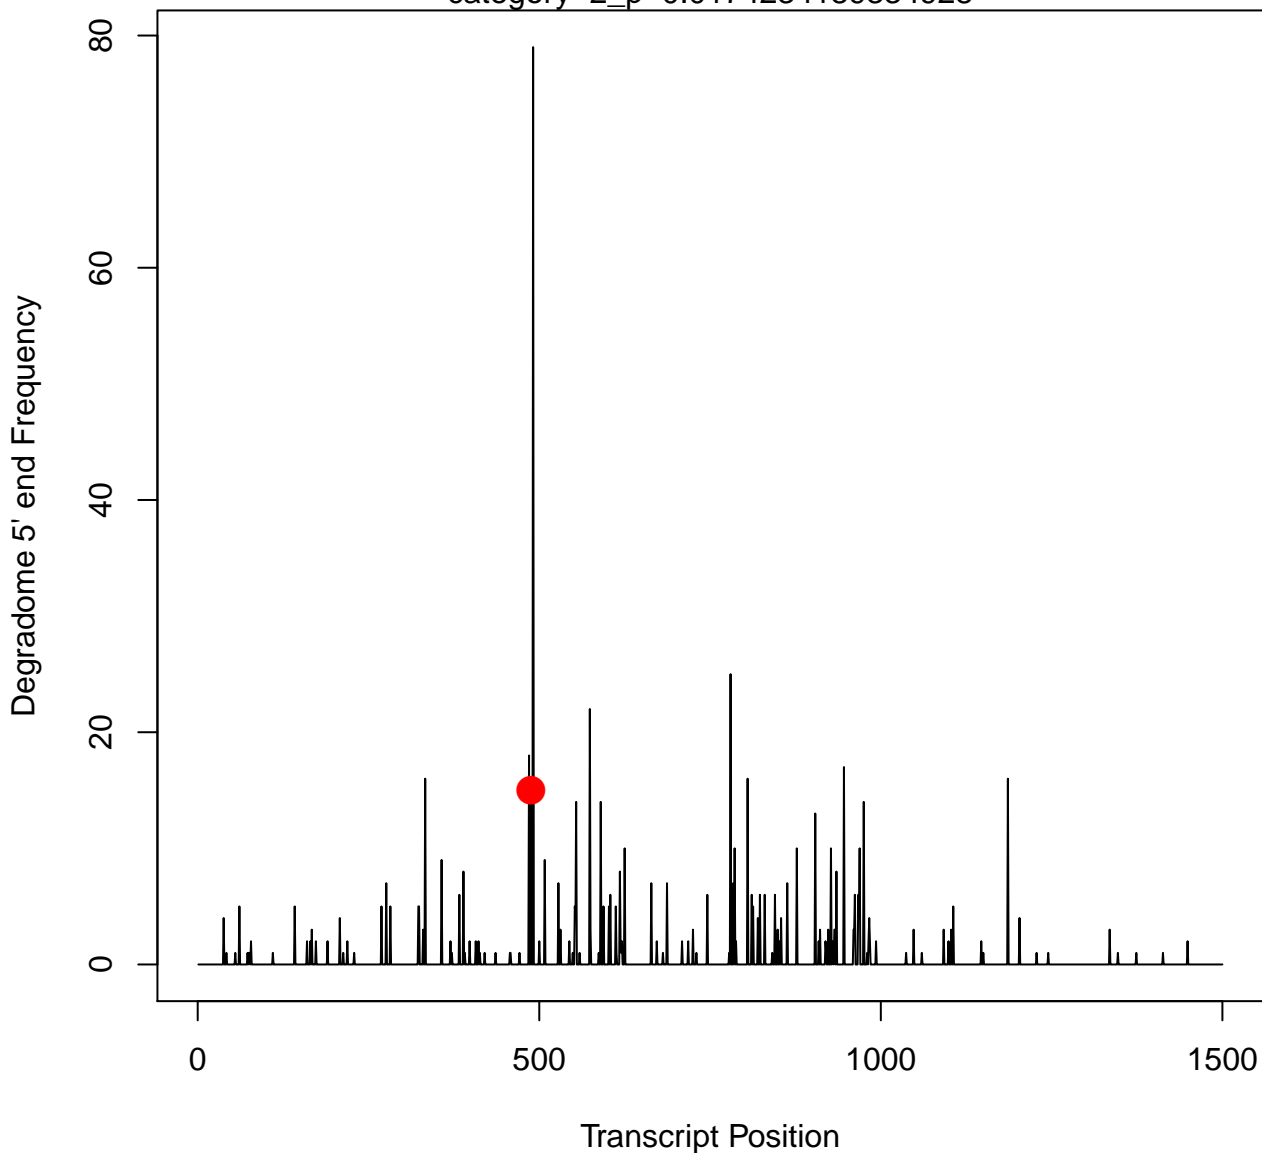

Supplement: Data_Sheet_1.zip [file Data_Sheet_1.zip]

**T=evm.model.LG06.1993\_Q=miRN11-5p\_S=776**

category=1\_p=0.0429698226235549

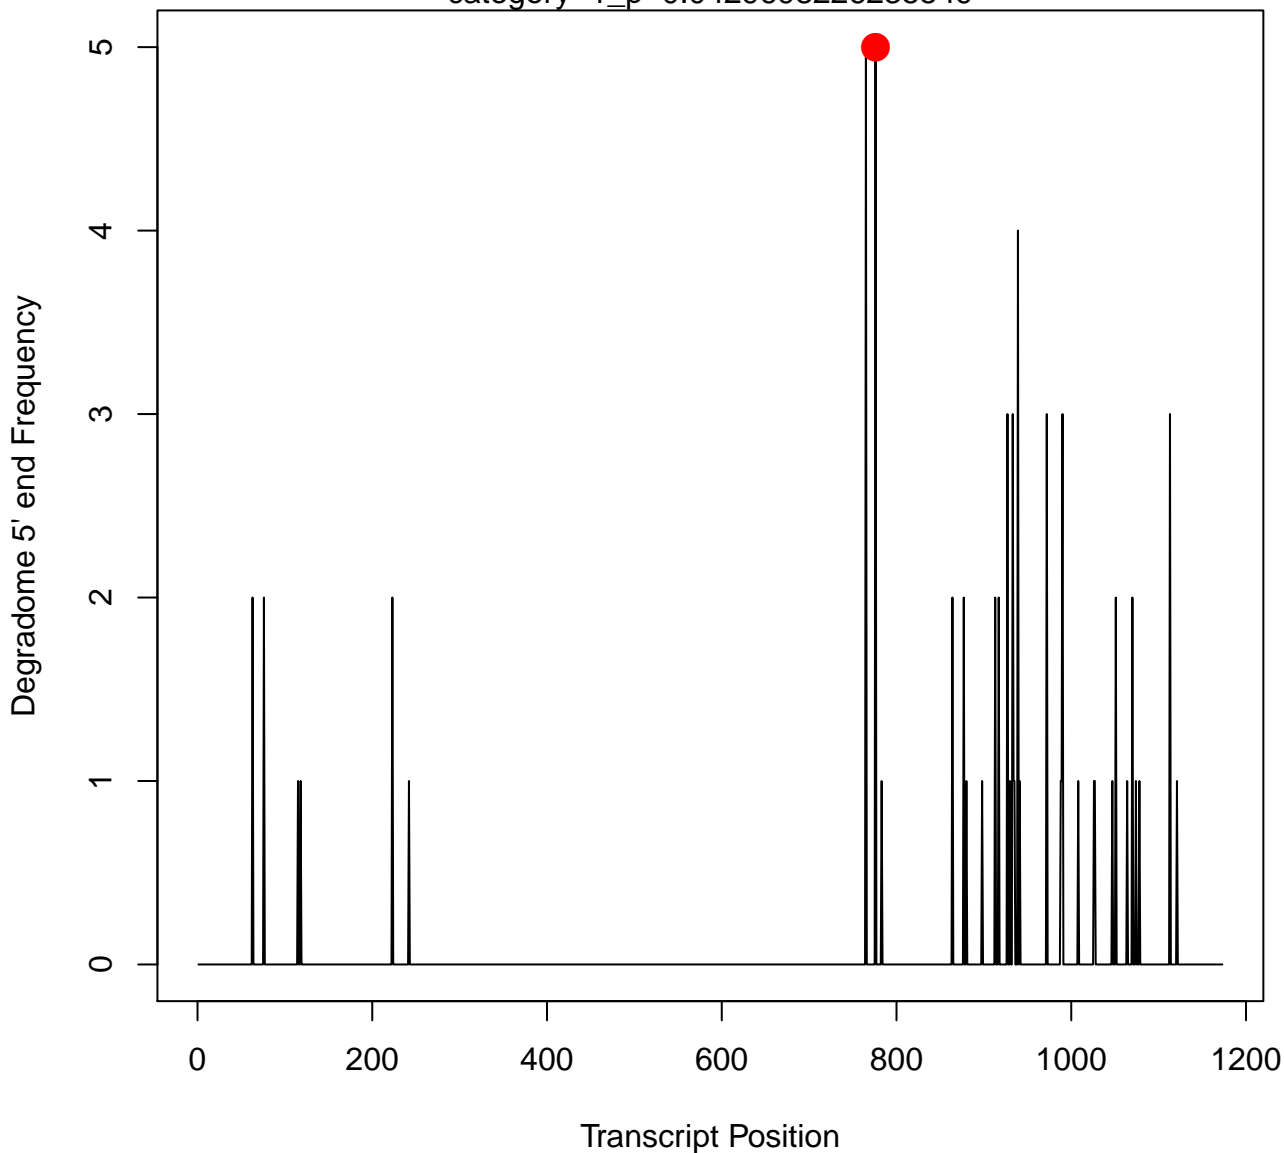

Supplement: Data_Sheet_1.zip [file Data_Sheet_1.zip]

**T=evm.model.LG03.2778\_Q=miR166e-3p\_S=550**

category=2\_p=0.0174234189334928

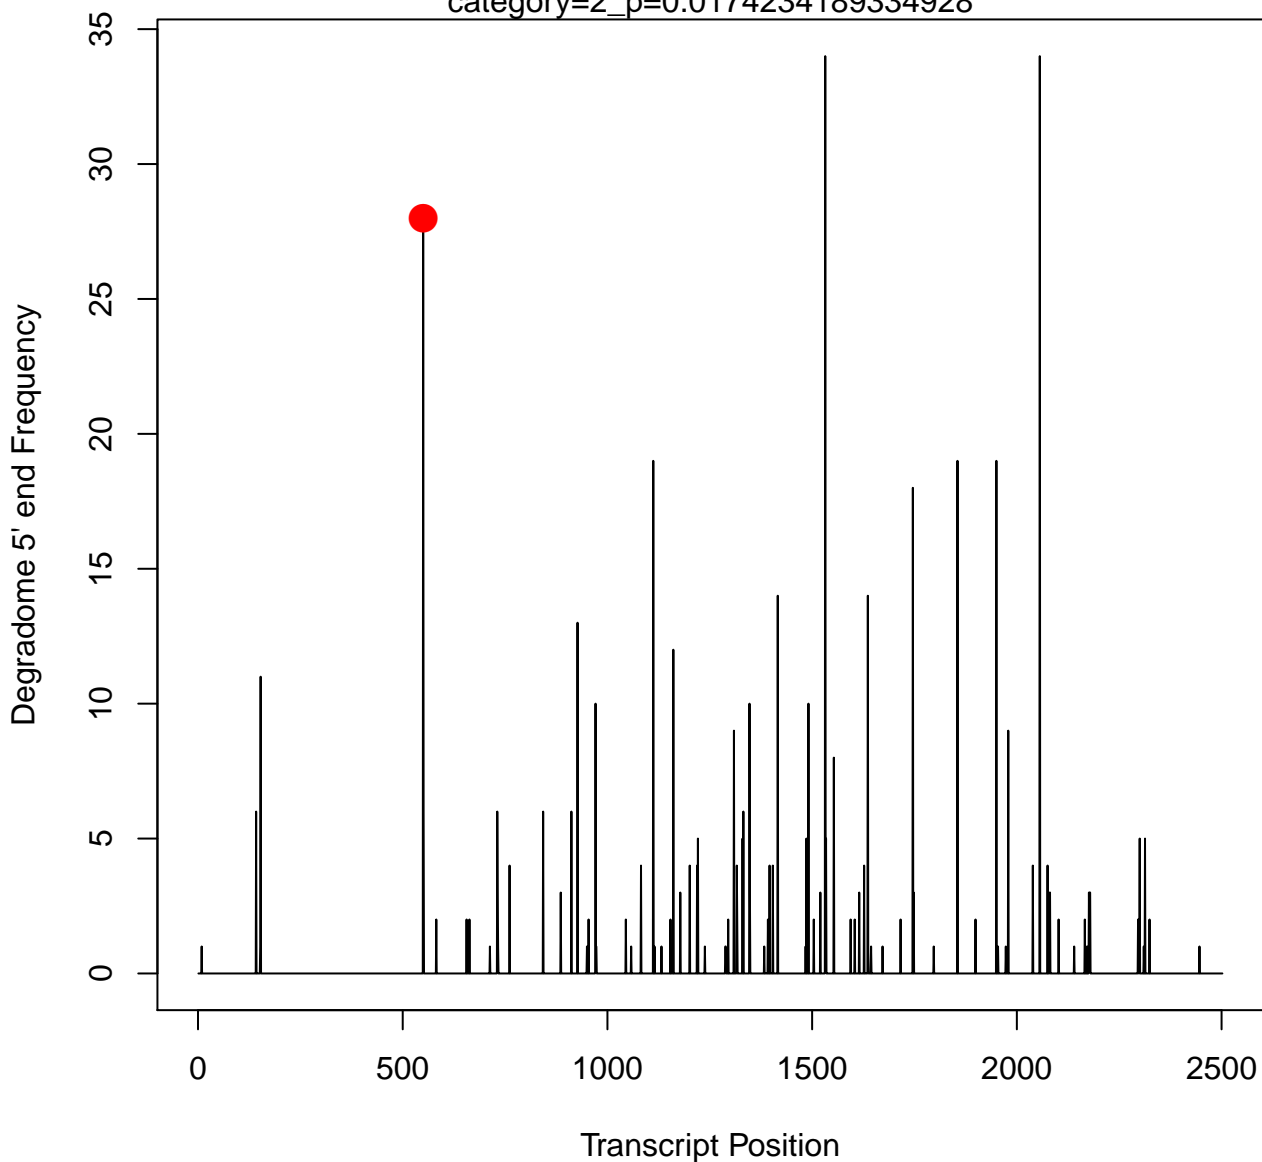

Supplement: Data_Sheet_1.zip [file Data_Sheet_1.zip]

**T=evm.model.LG05.2085\_Q=miR171h-3p\_S=548**

category=4\_p=0.00862274555333054

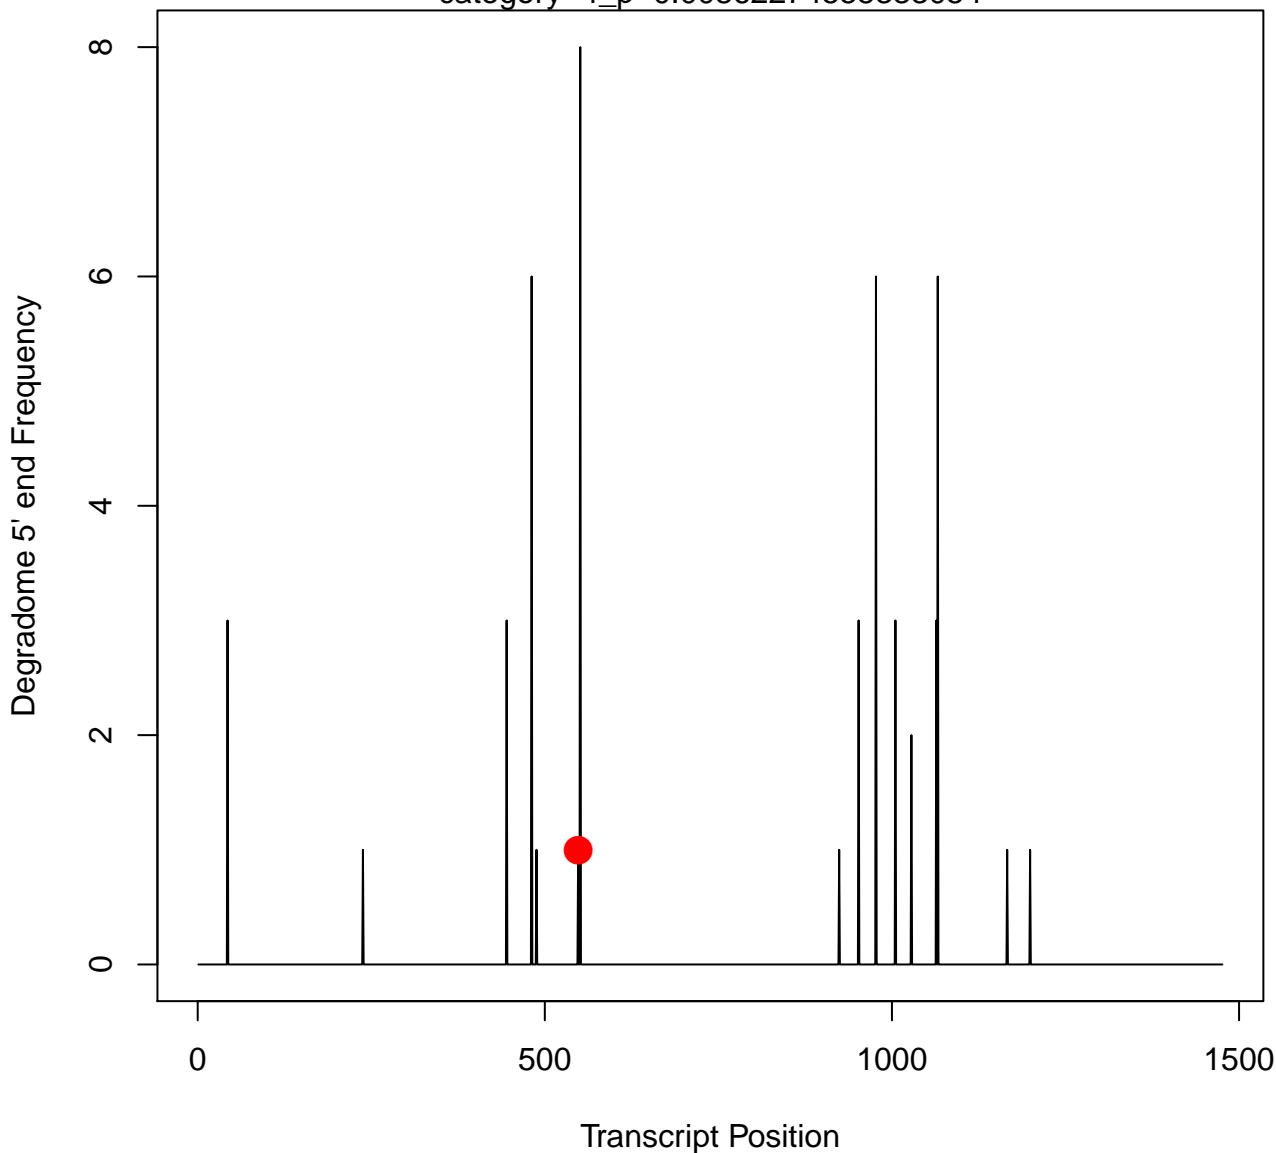

Supplement: Data_Sheet_1.zip [file Data_Sheet_1.zip]

**T=evm.model.LG03.3558\_Q=miR166i-5p\_S=1127**

category=4\_p=0.0256458225535021

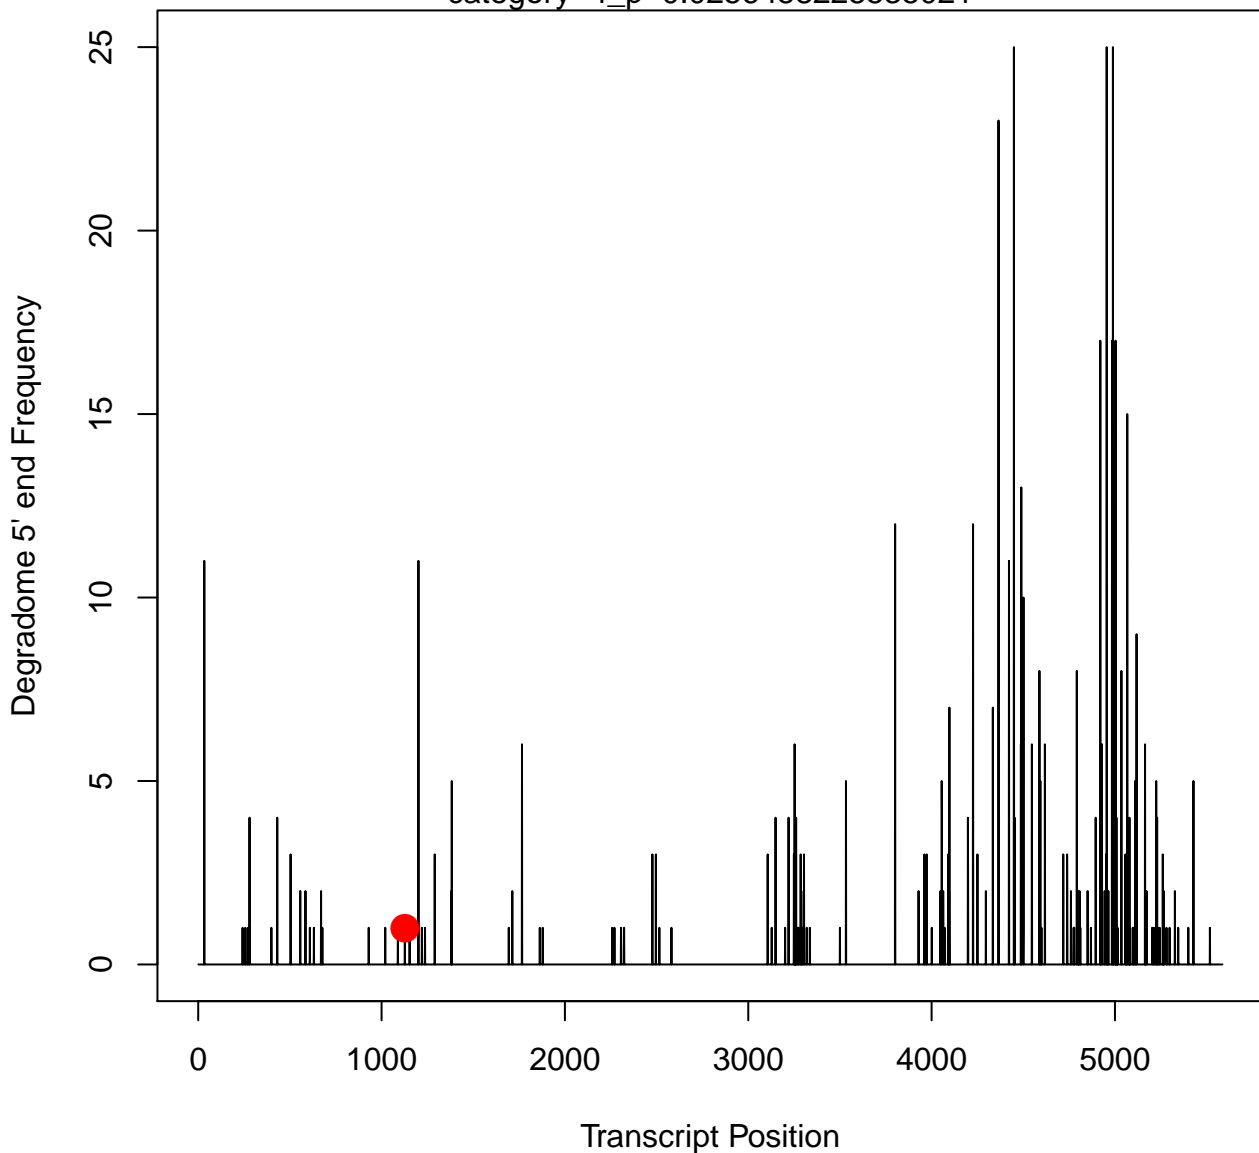

Supplement: Data_Sheet_1.zip [file Data_Sheet_1.zip]

**T=evm.model.LG03.1086\_Q=miR171a-3p\_S=491**

category=0\_p=0.00207487934604456

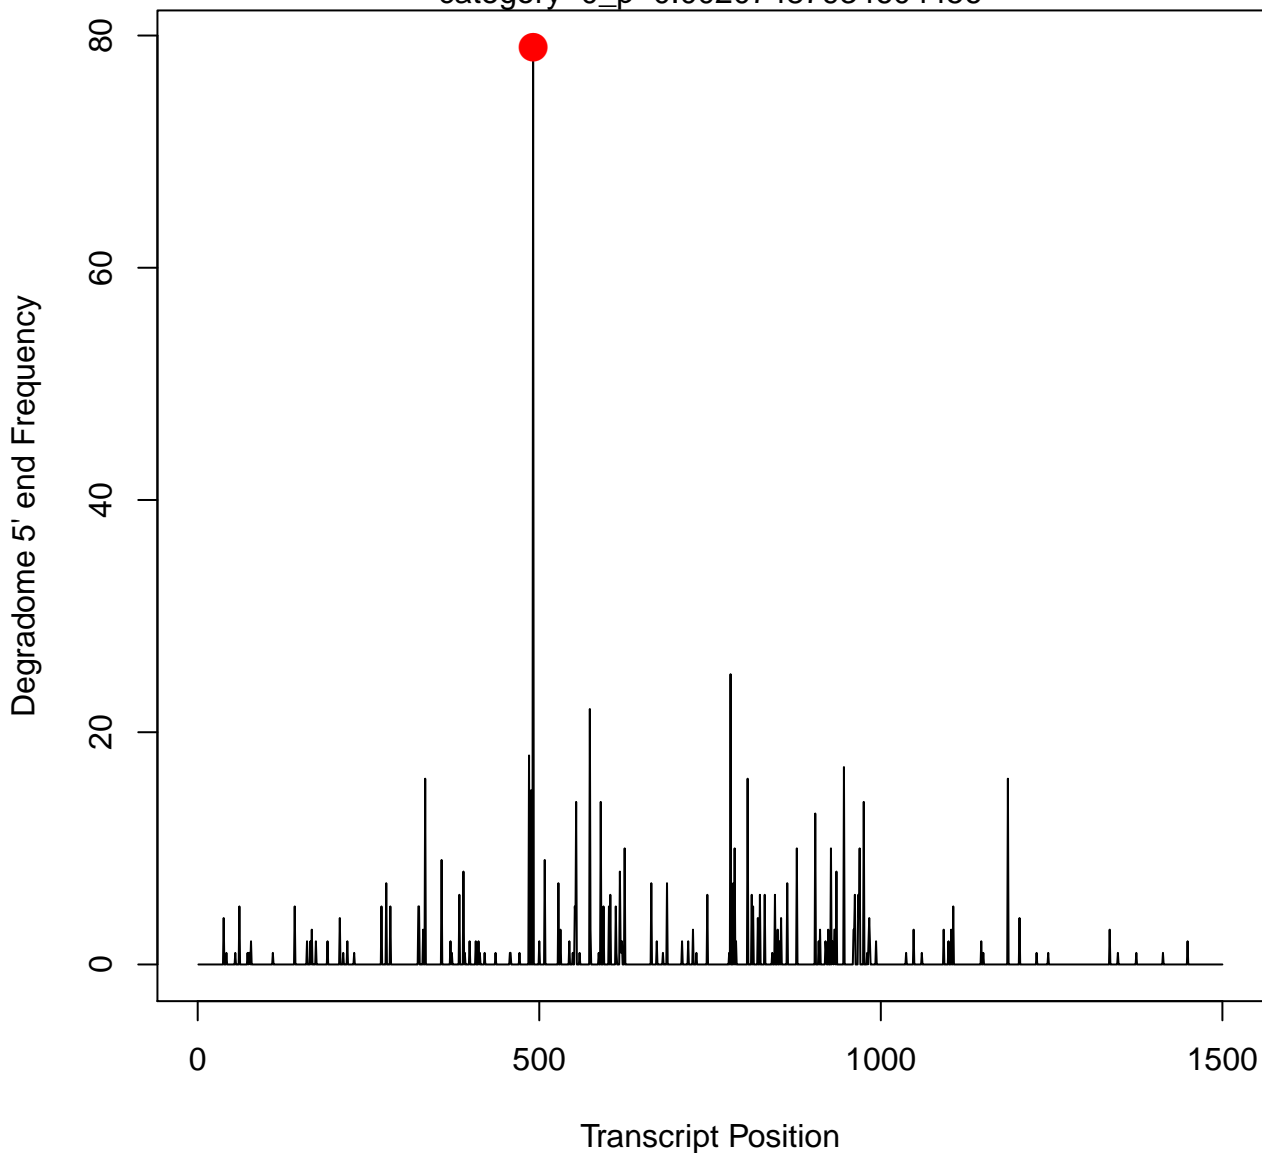

Supplement: Data_Sheet_1.zip [file Data_Sheet_1.zip]

**T=evm.model.LG01.7049\_Q=miR167a-5p\_S=2222**

category=3\_p=0.0477069564524738

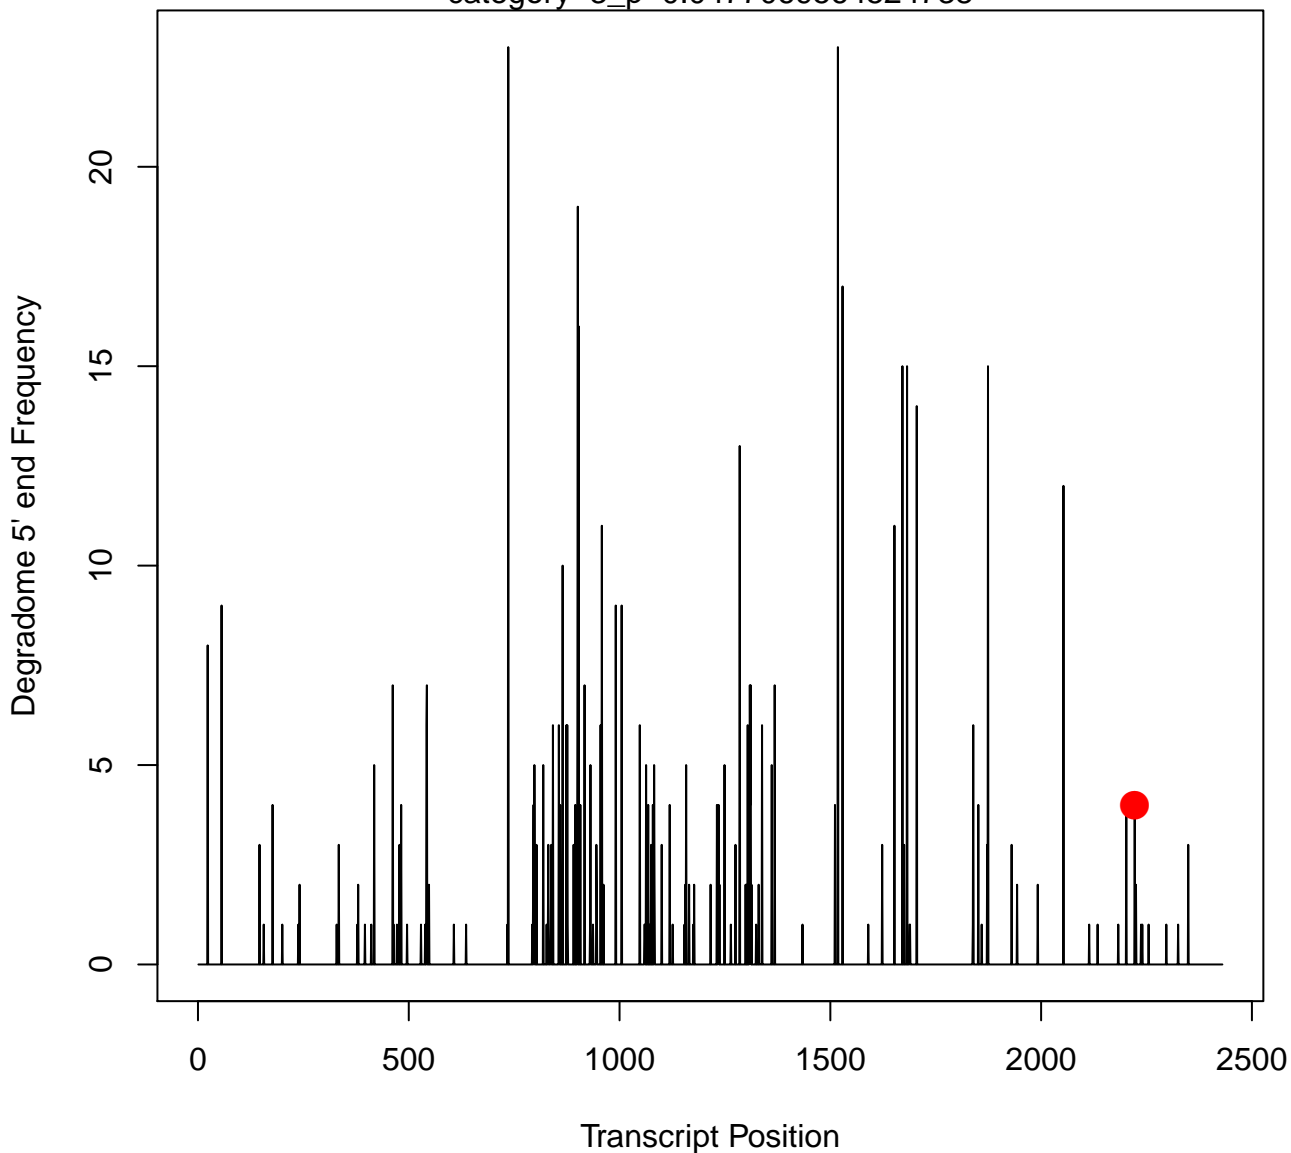

Supplement: Data_Sheet_1.zip [file Data_Sheet_1.zip]

**T=evm.model.LG06.353\_Q=miR3623a-5p\_S=287**

category=2\_p=0.00874999063480097

Degradome 5' end Frequency

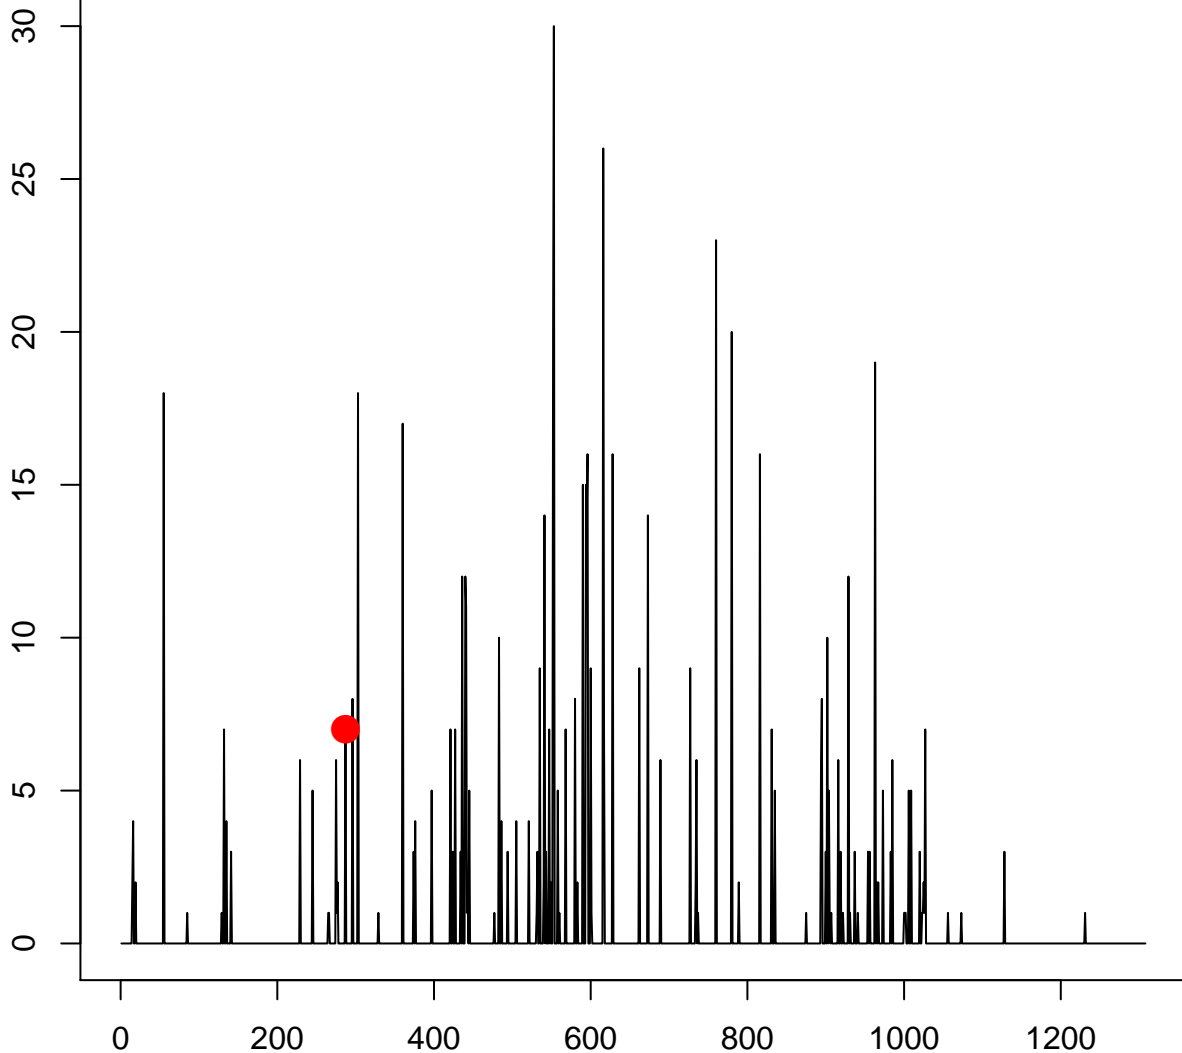

Transcript Position

Supplement: Data_Sheet_1.zip [file Data_Sheet_1.zip]

**T=evm.model.LG03.1086\_Q=miR171h-3p\_S=488**

category=2\_p=0.0174234189334928

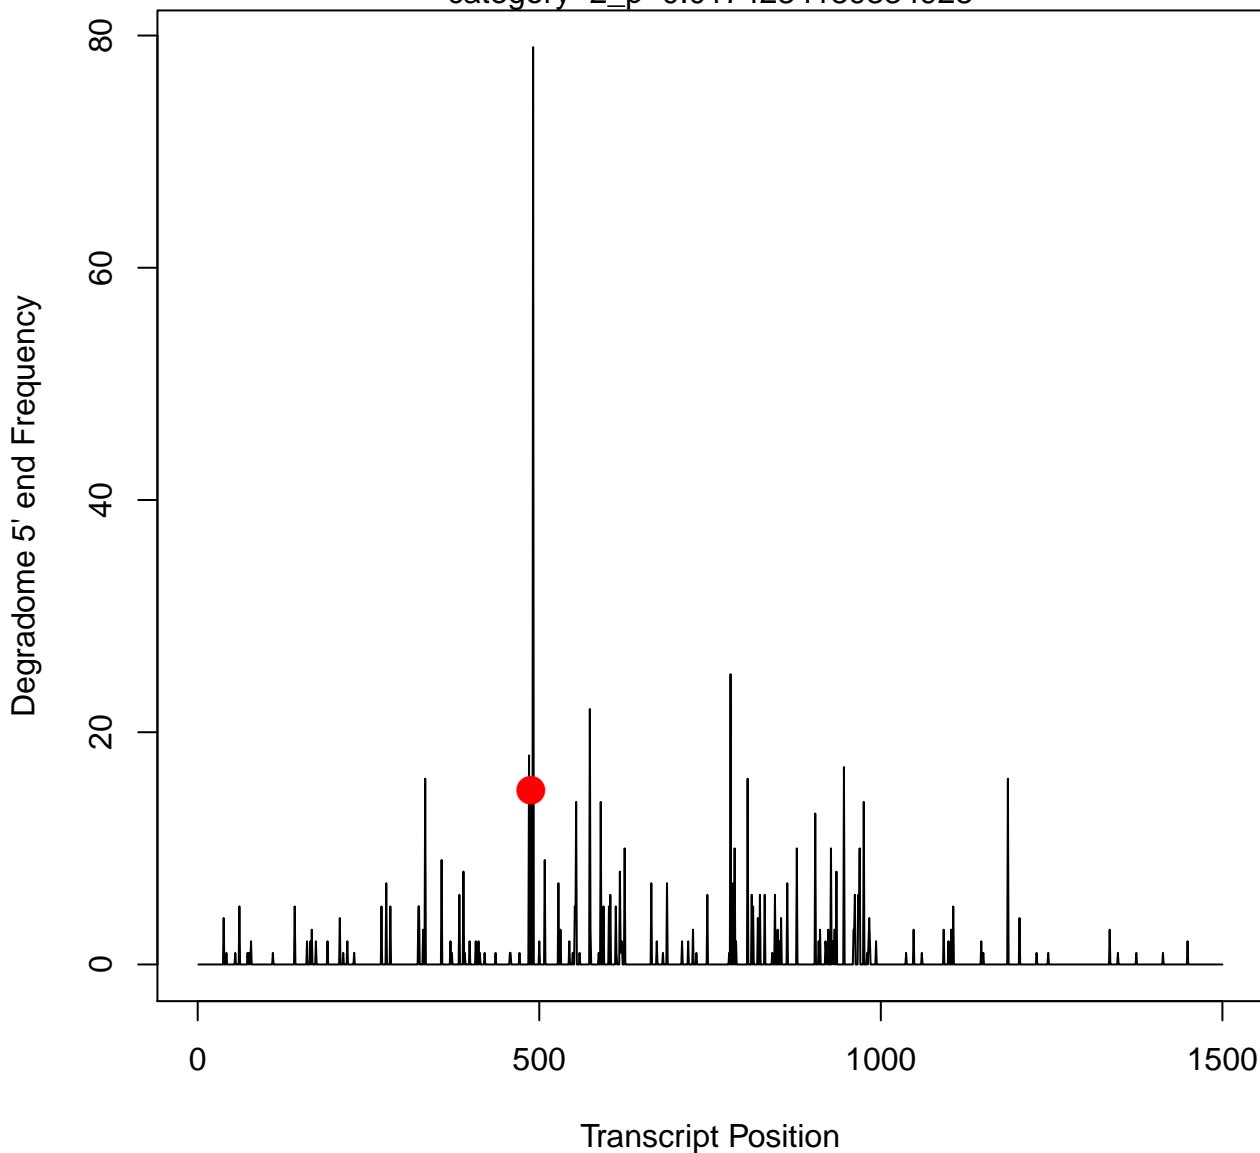

Supplement: Data_Sheet_1.zip [file Data_Sheet_1.zip]

**T=evm.model.LG01.6312\_Q=miR2111-5p\_S=128**

category=4\_p=0.00862274555333054

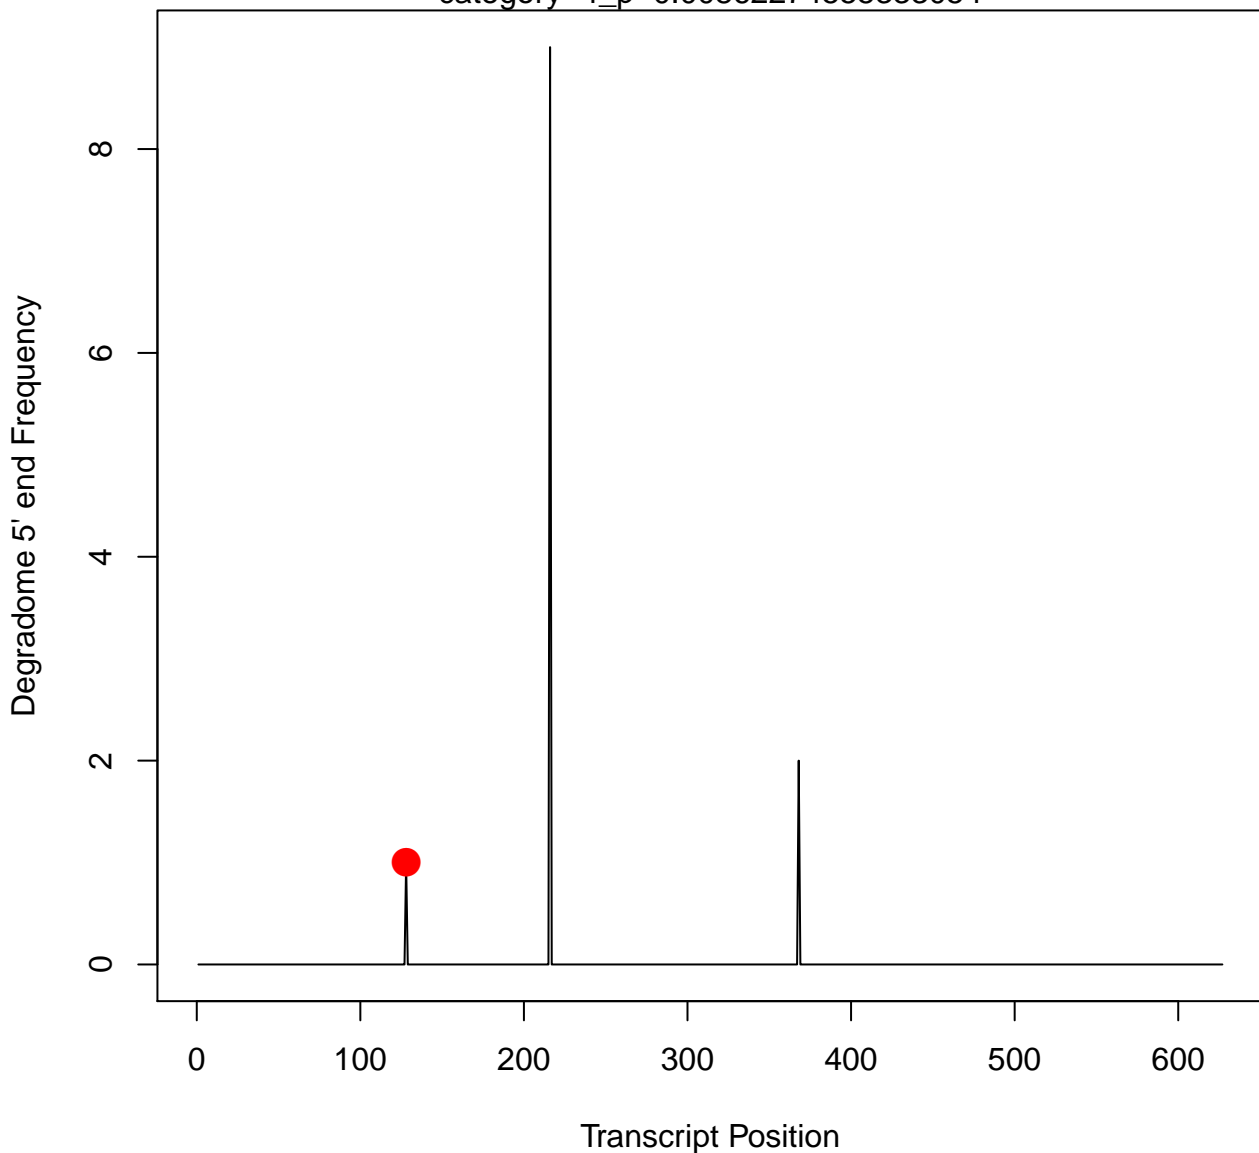

Supplement: Data_Sheet_1.zip [file Data_Sheet_1.zip]

**T=evm.model.LG03.4927\_Q=miR394a-5p\_S=1537**

category=1\_p=0.000266148544176392

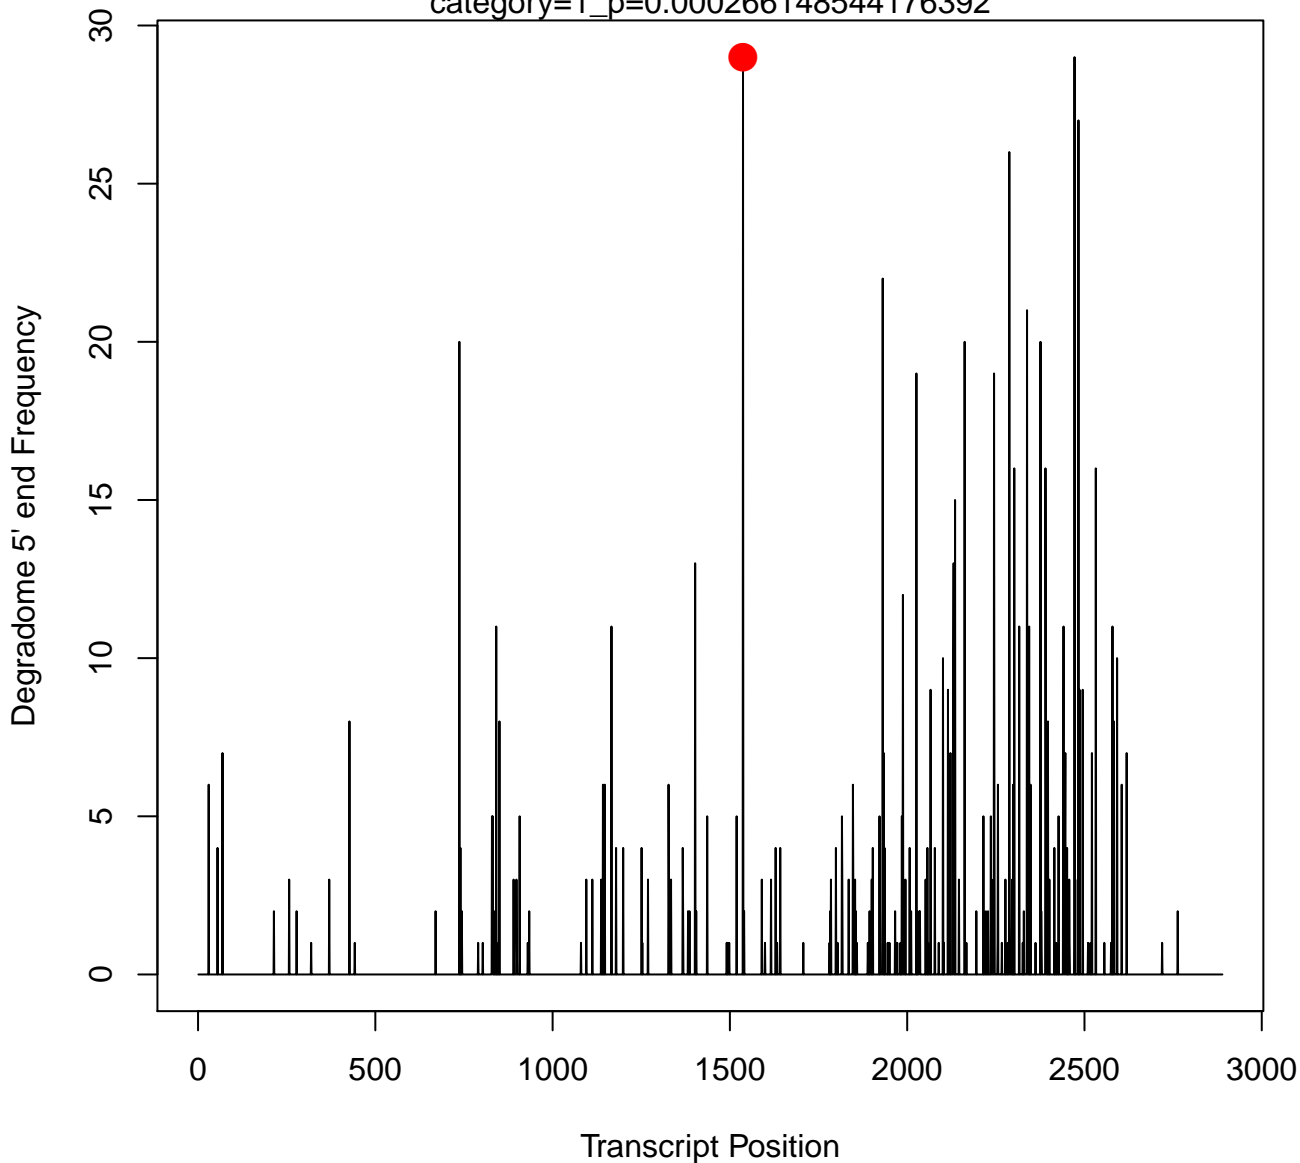

Supplement: Data_Sheet_1.zip [file Data_Sheet_1.zip]

**T=evm.model.LG05.368\_Q=miRN14-5p\_S=356**

category=0\_p=0.00827372235029444

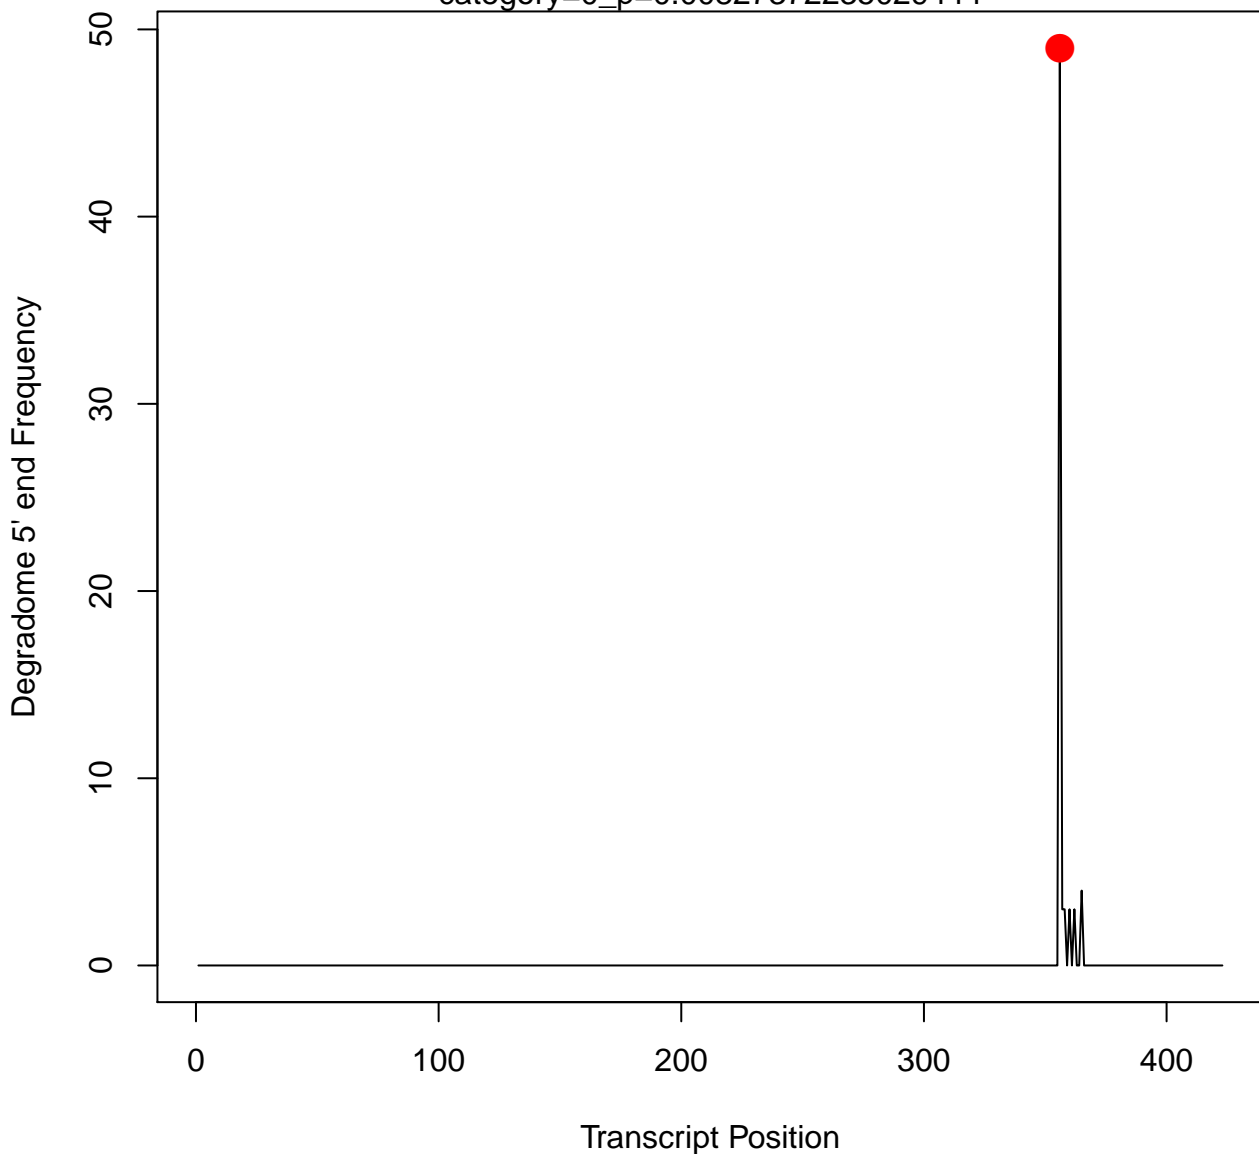

Supplement: Data_Sheet_1.zip [file Data_Sheet_1.zip]

**T=evm.model.LG05.234\_Q=miR396b-5p\_S=125**

category=1\_p=0.00039919625194329

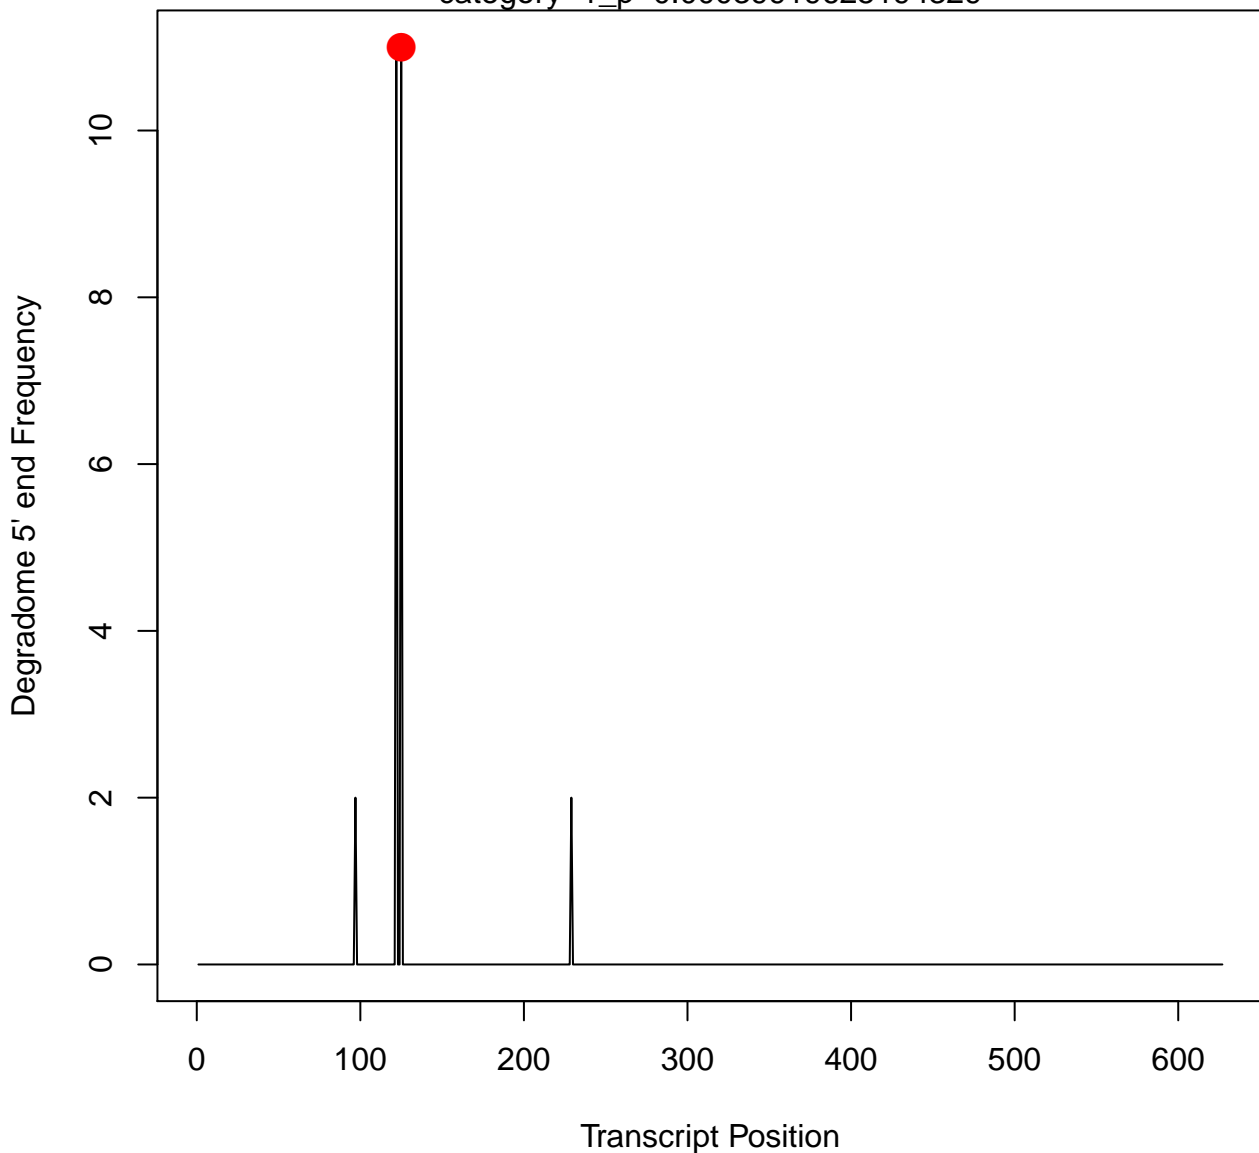

Supplement: Data_Sheet_1.zip [file Data_Sheet_1.zip]

**T=evm.model.LG01.1279\_Q=miRN14-5p\_S=344**

category=0\_p=0.0241097620029824

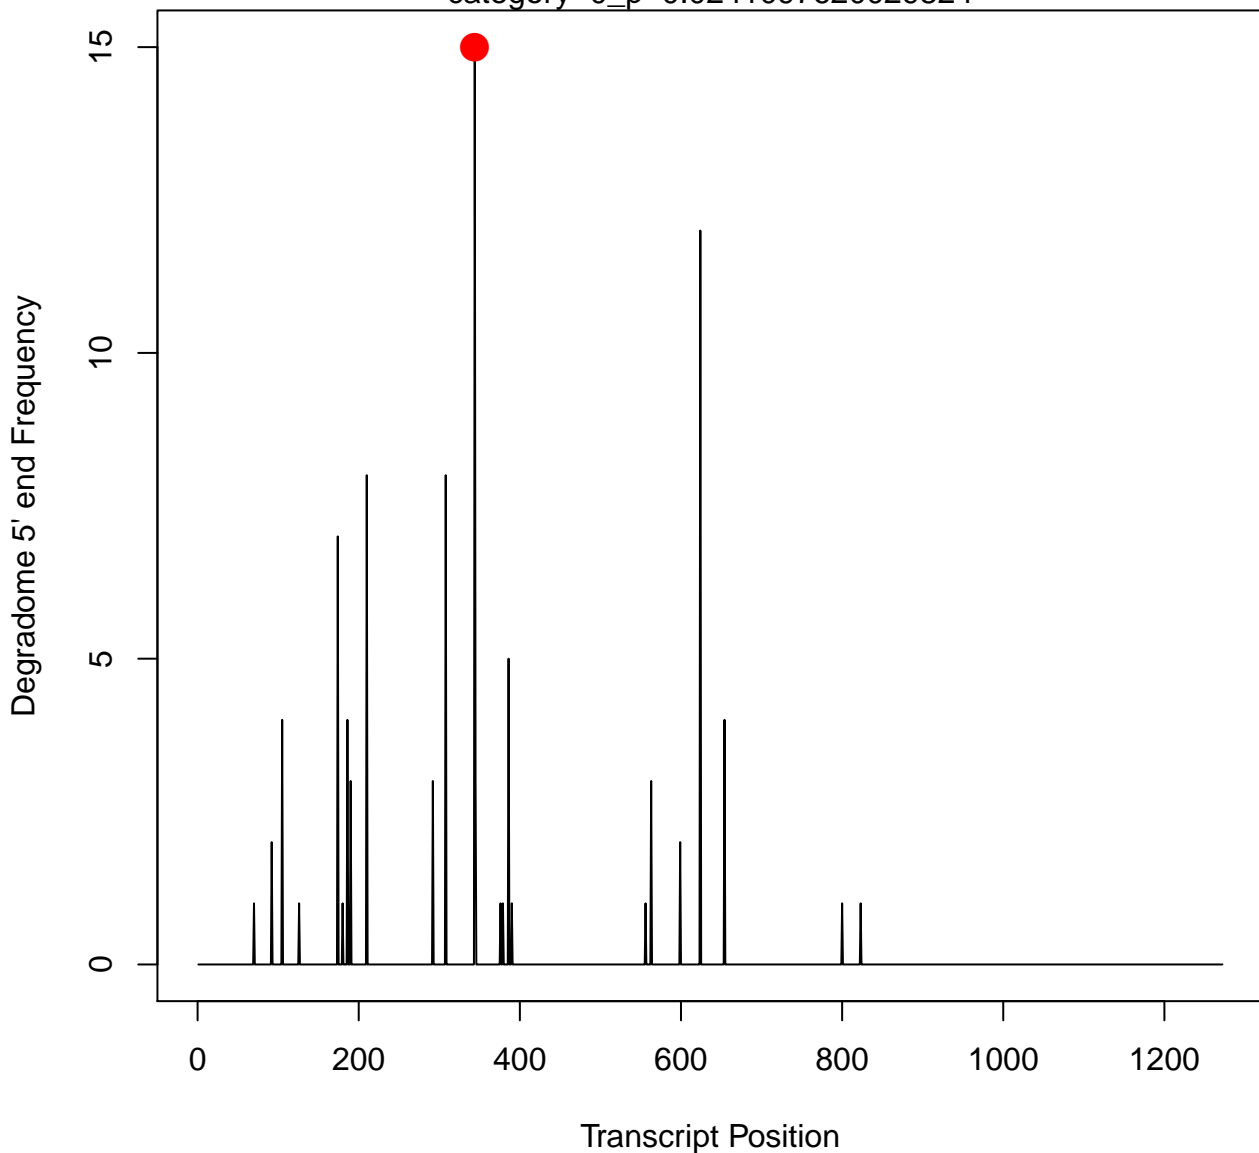

Supplement: Data_Sheet_1.zip [file Data_Sheet_1.zip]

**T=evm.model.LG05.2295\_Q=miR167e-5p\_S=1994**

category=2\_p=0.0260209548157995

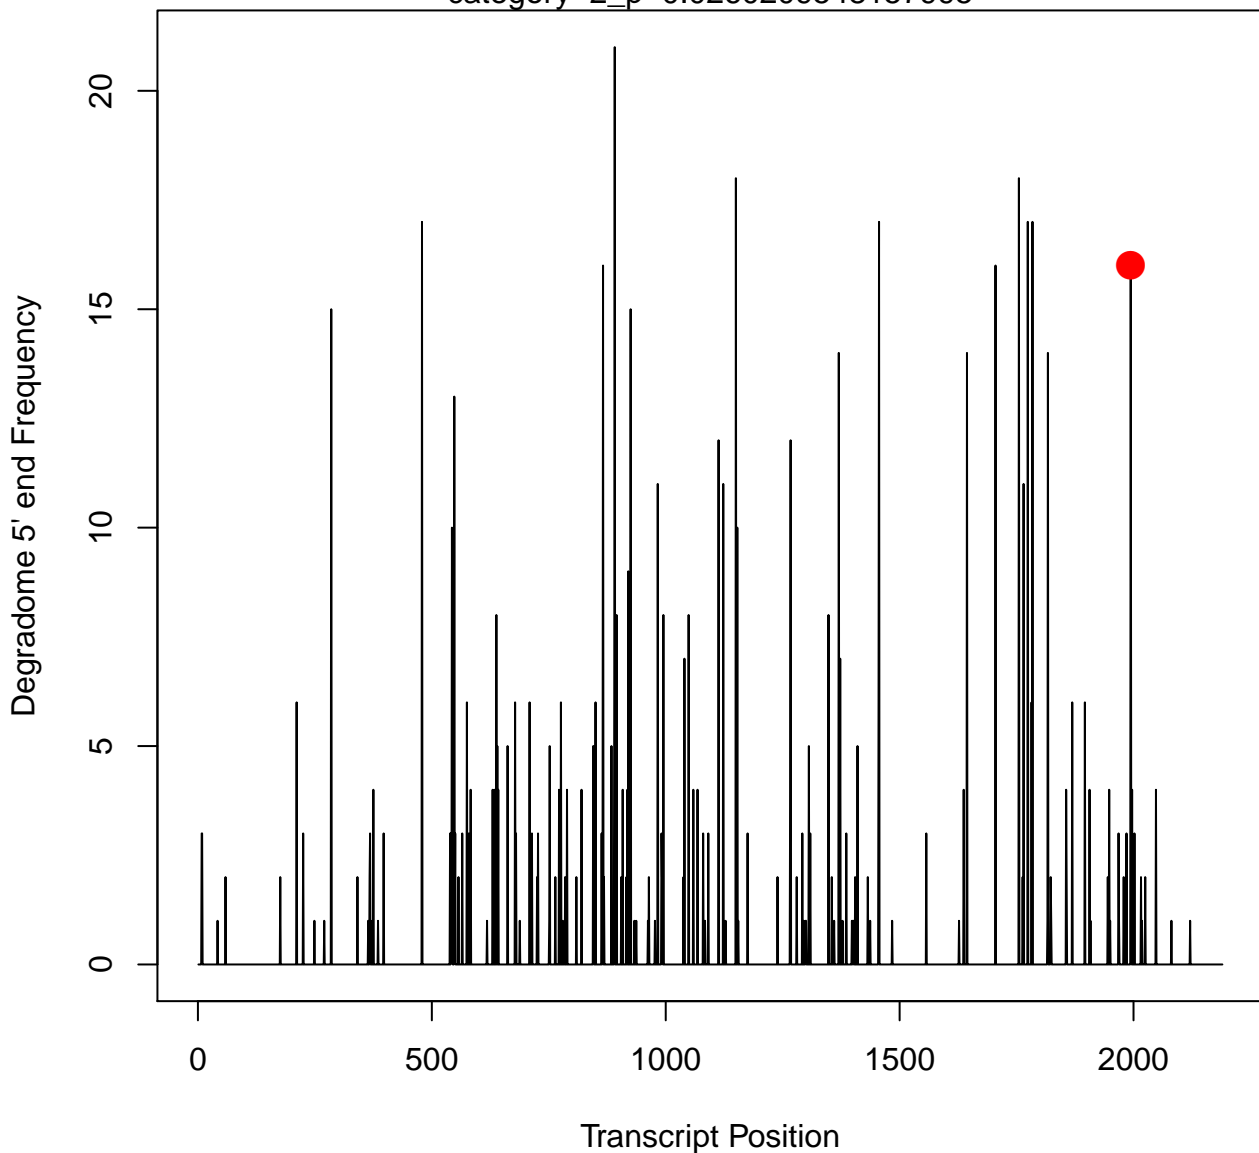

Supplement: Data_Sheet_1.zip [file Data_Sheet_1.zip]

**T=evm.model.LG01.294\_Q=miR396a-5p\_S=1091**

category=0\_p=0.00259292615763651

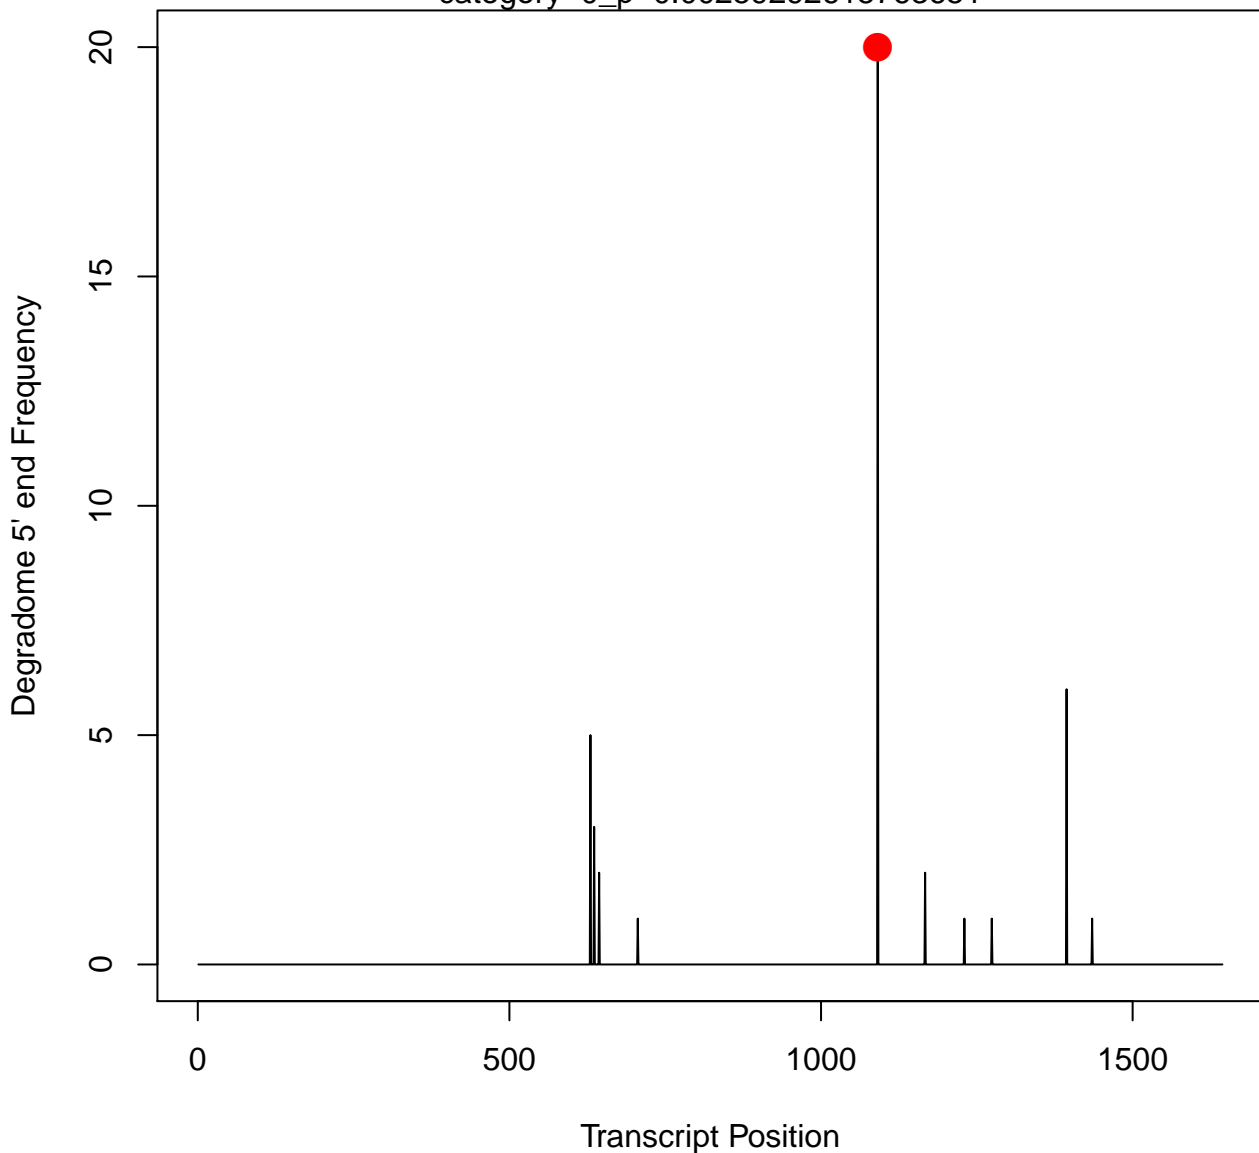

Supplement: Data_Sheet_1.zip [file Data_Sheet_1.zip]

**T=evm.model.LG05.3270\_Q=miR394c-5p\_S=1045**

category=2\_p=0.0260209548157995

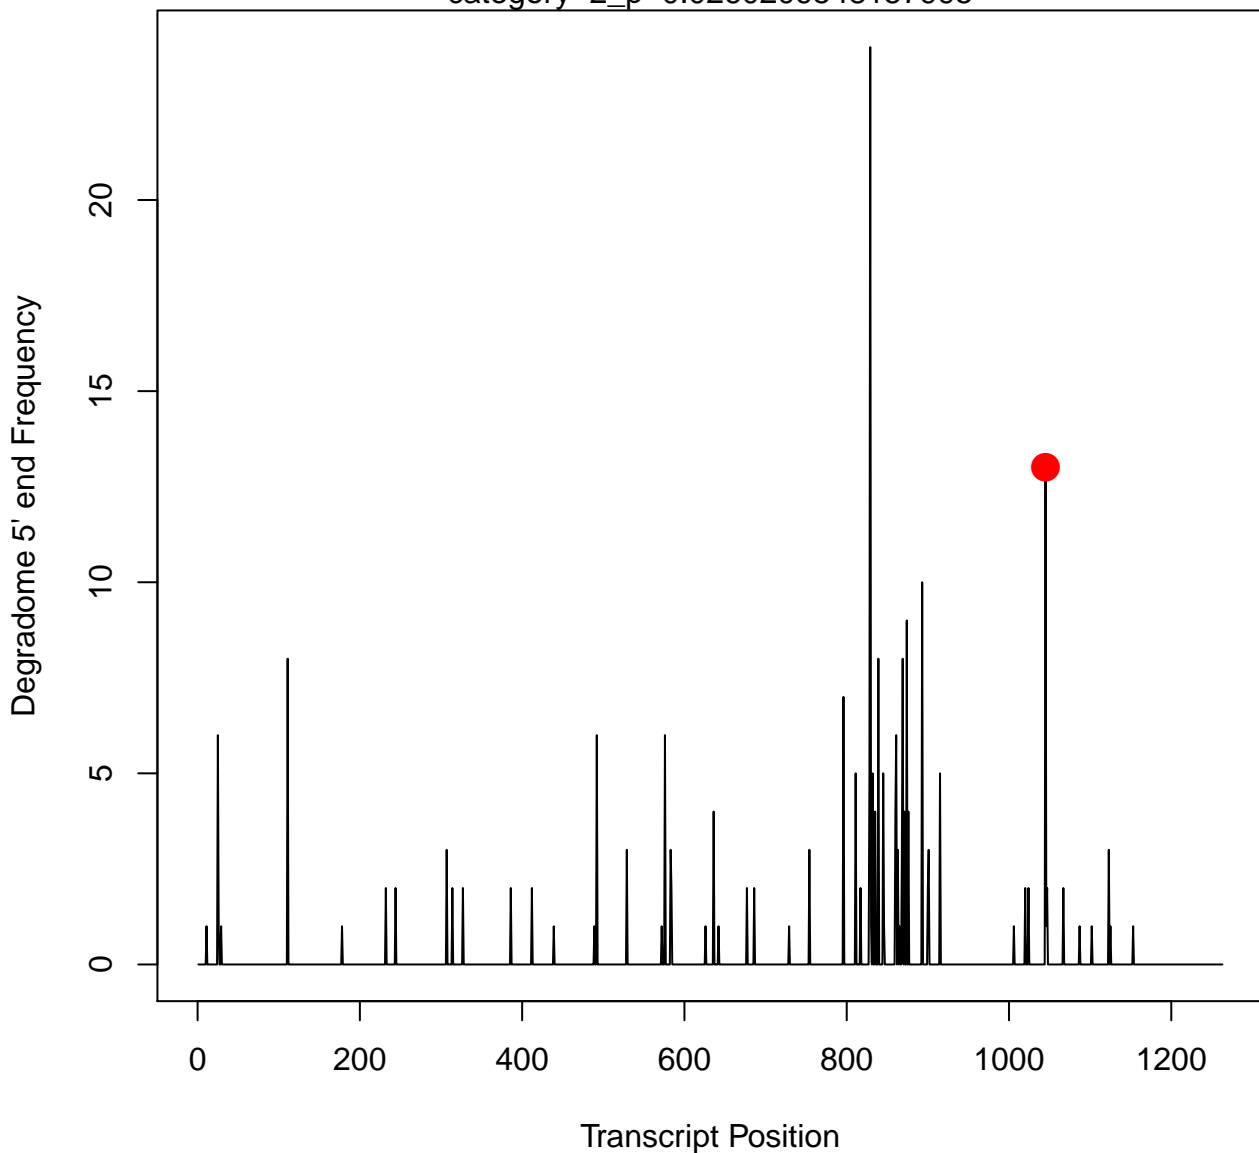

Supplement: Data_Sheet_1.zip [file Data_Sheet_1.zip]

**T=evm.model.LG03.4320\_Q=miRN2b-5p\_S=62**

category=0\_p=0.00155656346427469

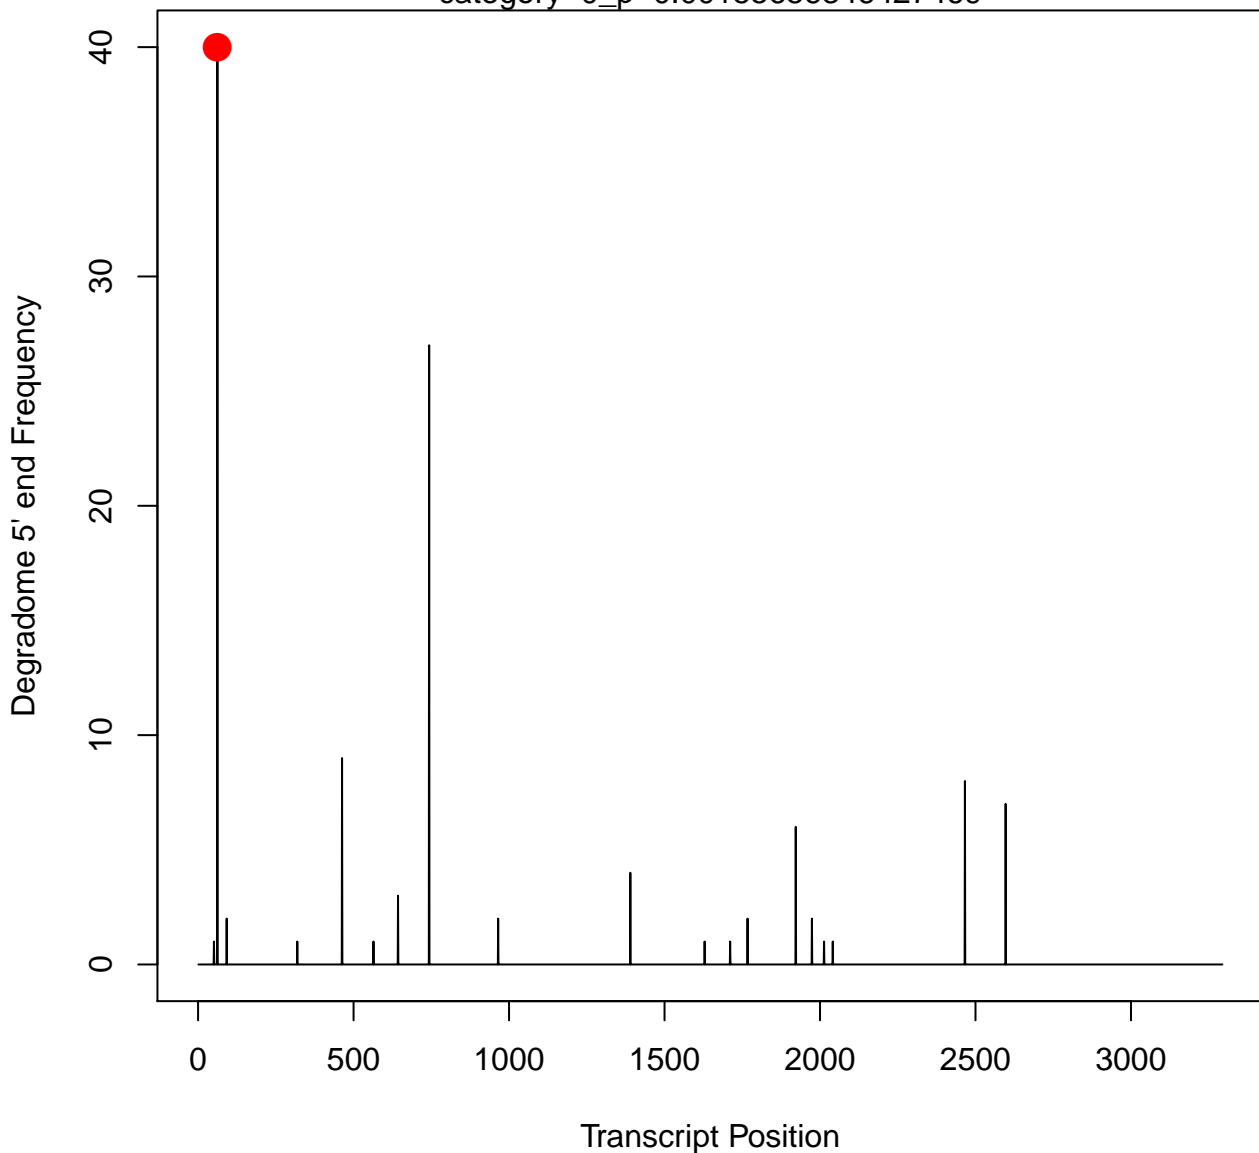

Supplement: Data_Sheet_1.zip [file Data_Sheet_1.zip]

**T=evm.model.LG03.2927\_Q=miR396d-5p\_S=377**

category=0\_p=0.00672763087043382

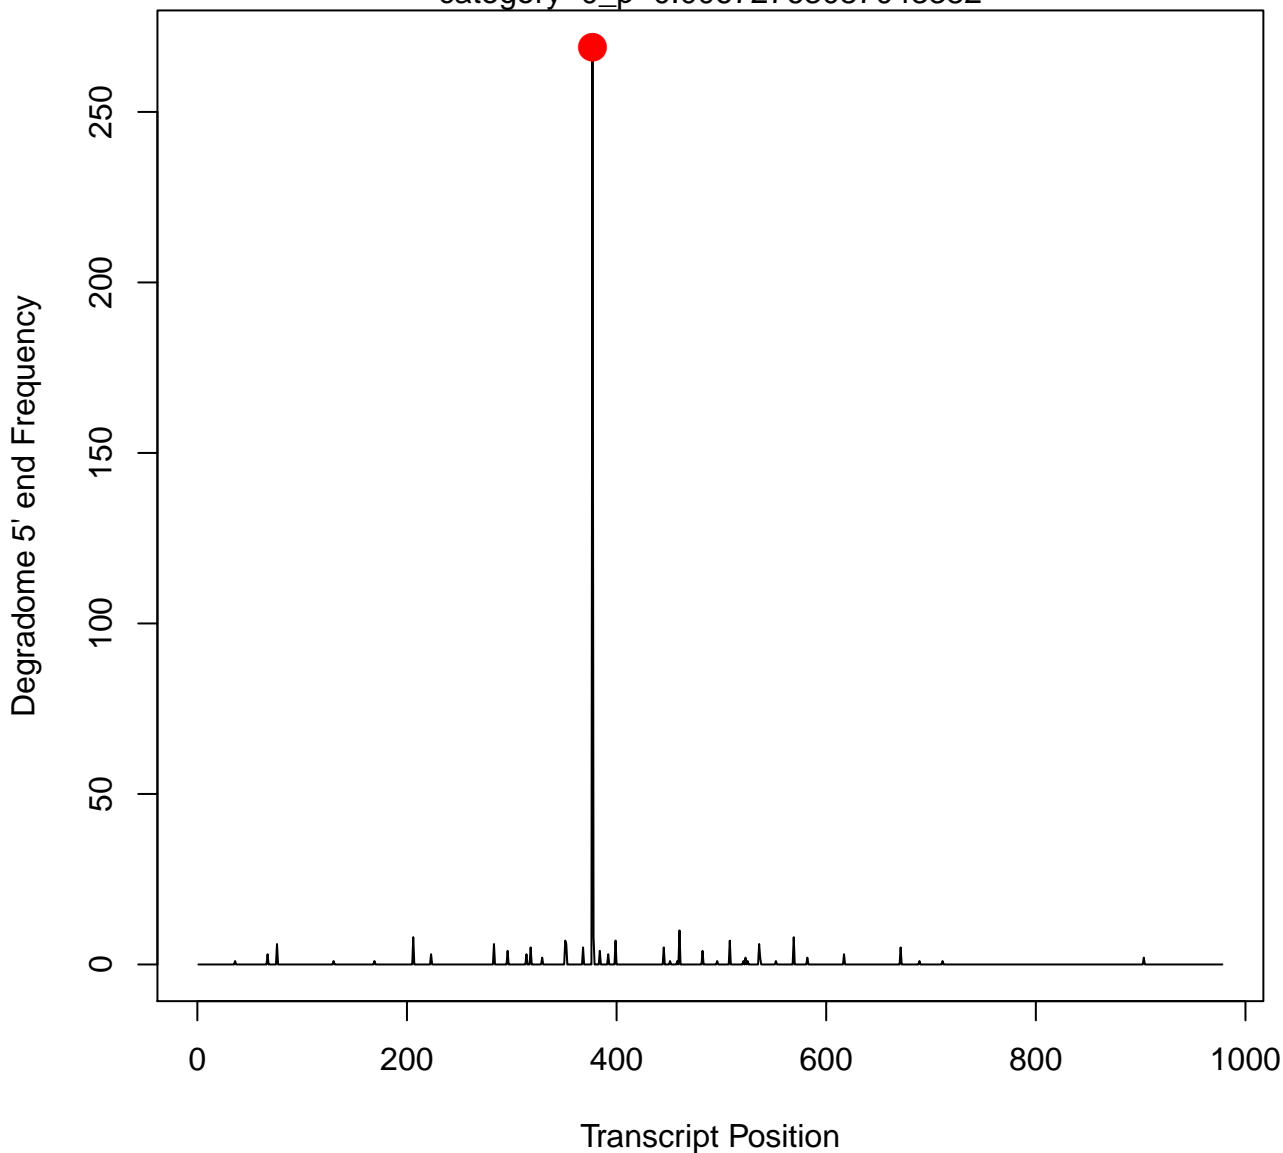

Supplement: Data_Sheet_1.zip [file Data_Sheet_1.zip]

**T=evm.model.LG01.5621\_Q=miR160a-5p\_S=1223**

category=0\_p=0.00259292615763651

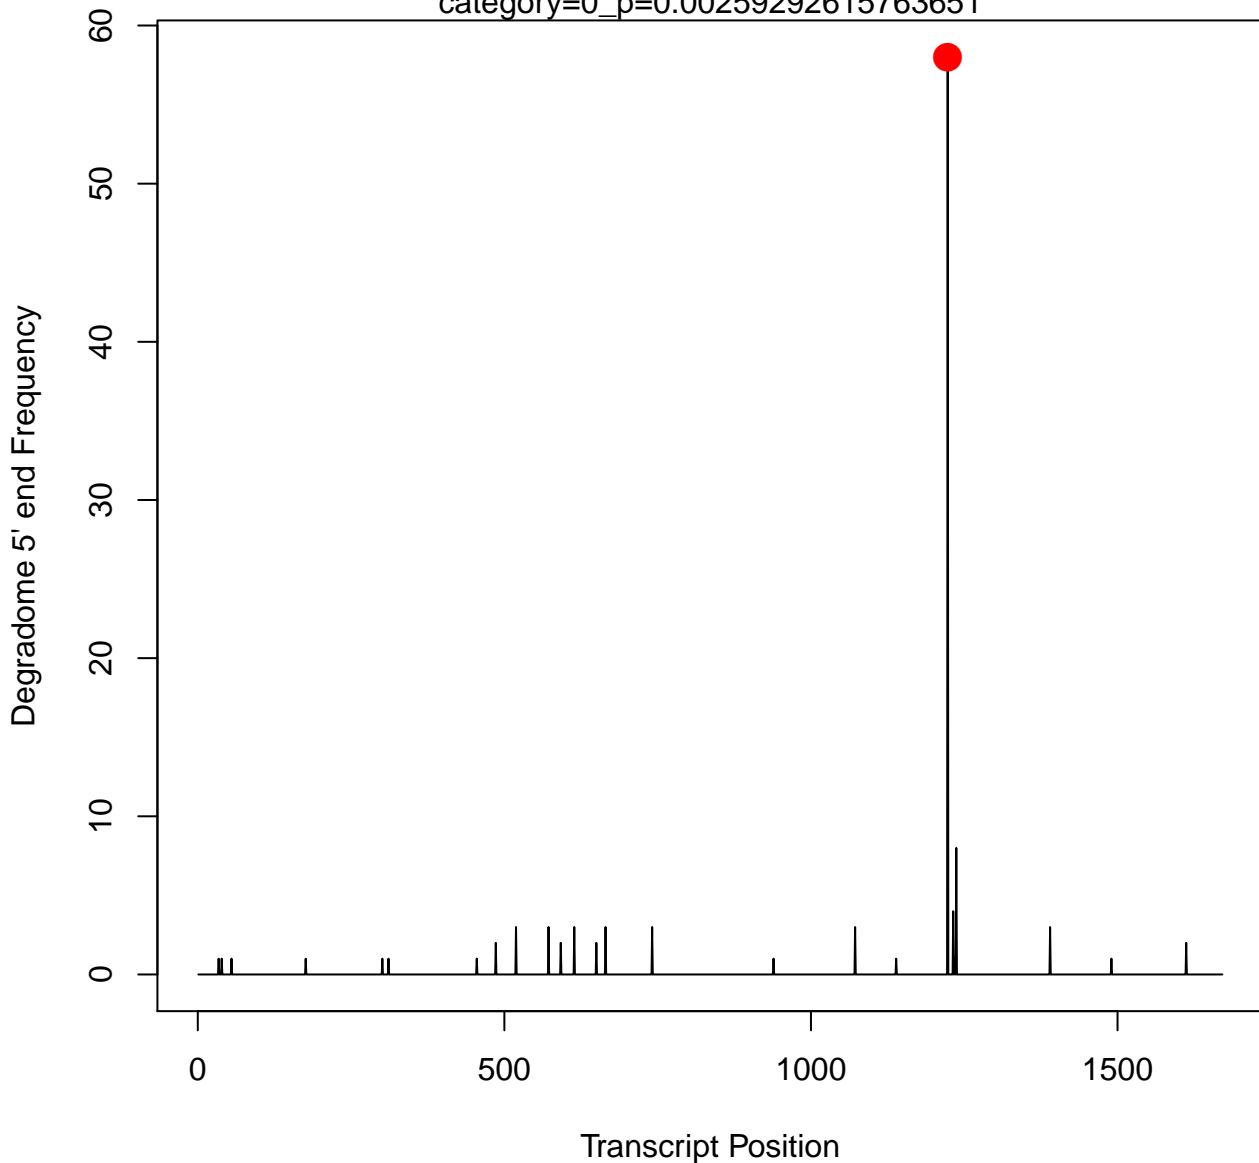

Supplement: Data_Sheet_1.zip [file Data_Sheet_1.zip]

**T=evm.model.LG02.5446\_Q=miR166a-3p\_S=565**

category=2\_p=0.042990999752487

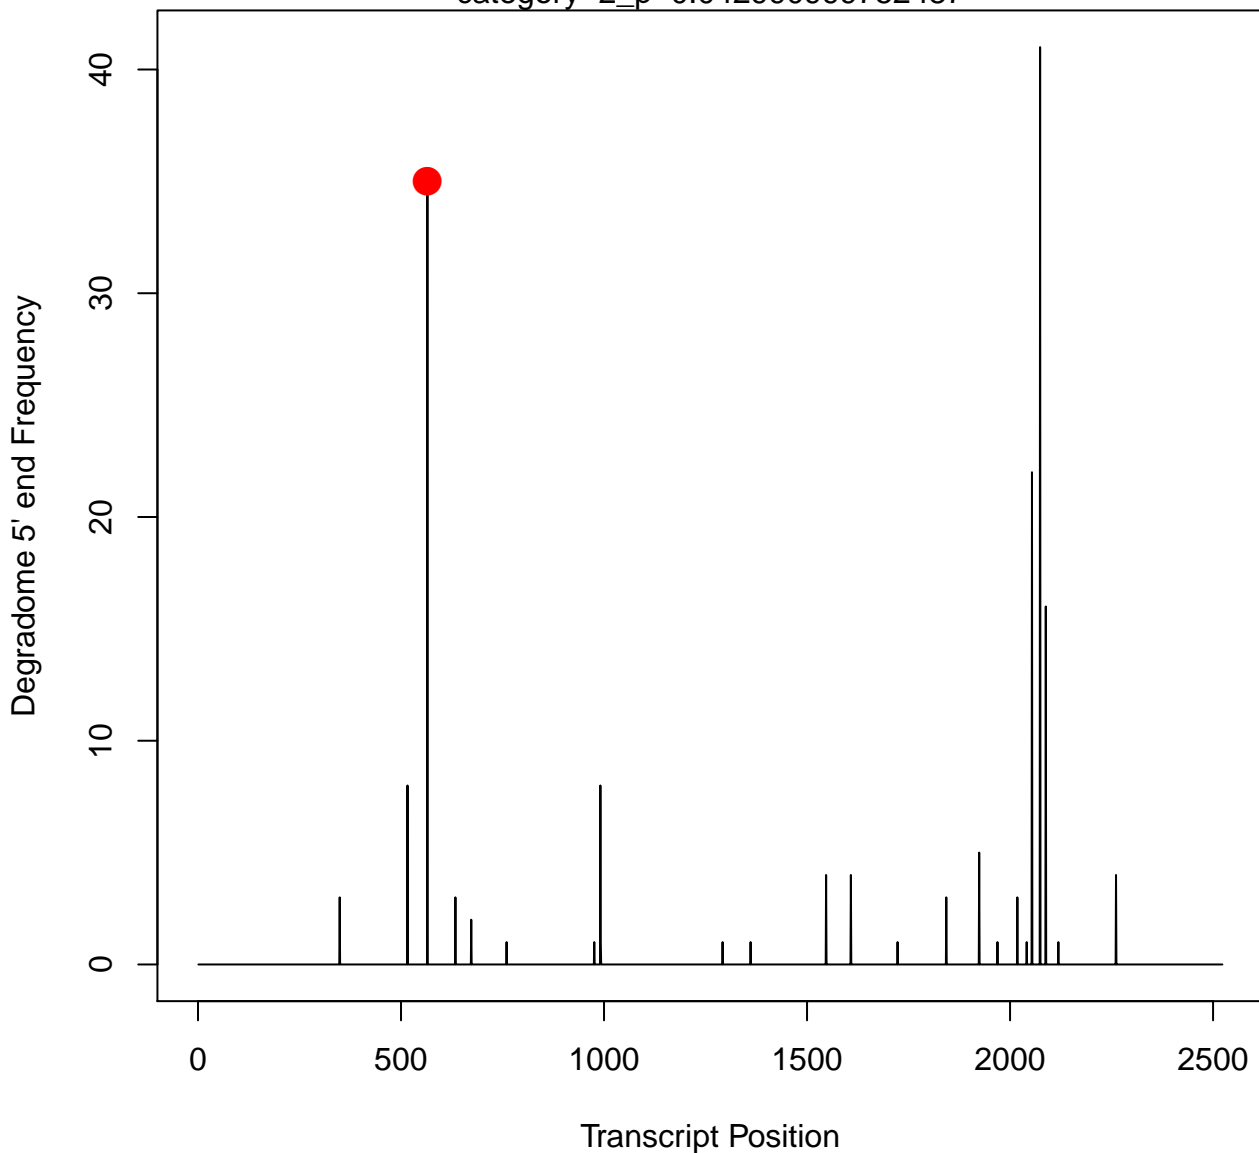

Supplement: Data_Sheet_1.zip [file Data_Sheet_1.zip]

**T=evm.model.LG07.185\_Q=miR393a-5p\_S=1576**

category=0\_p=0.0256287970925908

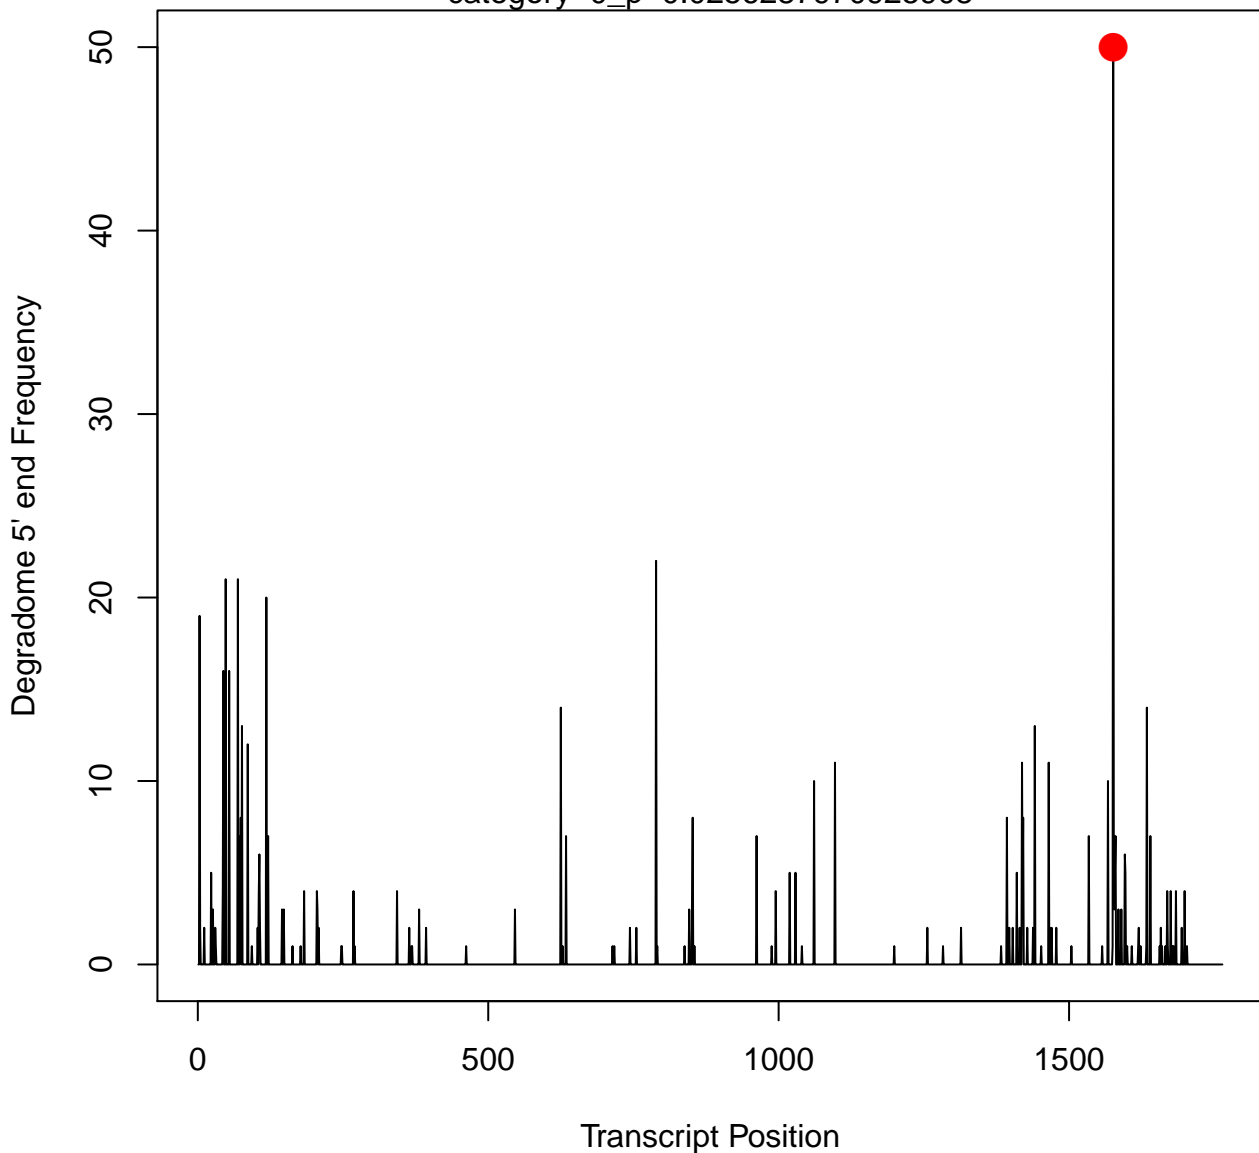

Supplement: Data_Sheet_1.zip [file Data_Sheet_1.zip]

**T=evm.model.LG04.3535\_Q=miRN17-3p\_S=4908**

category=2\_p=0.0345432623396535

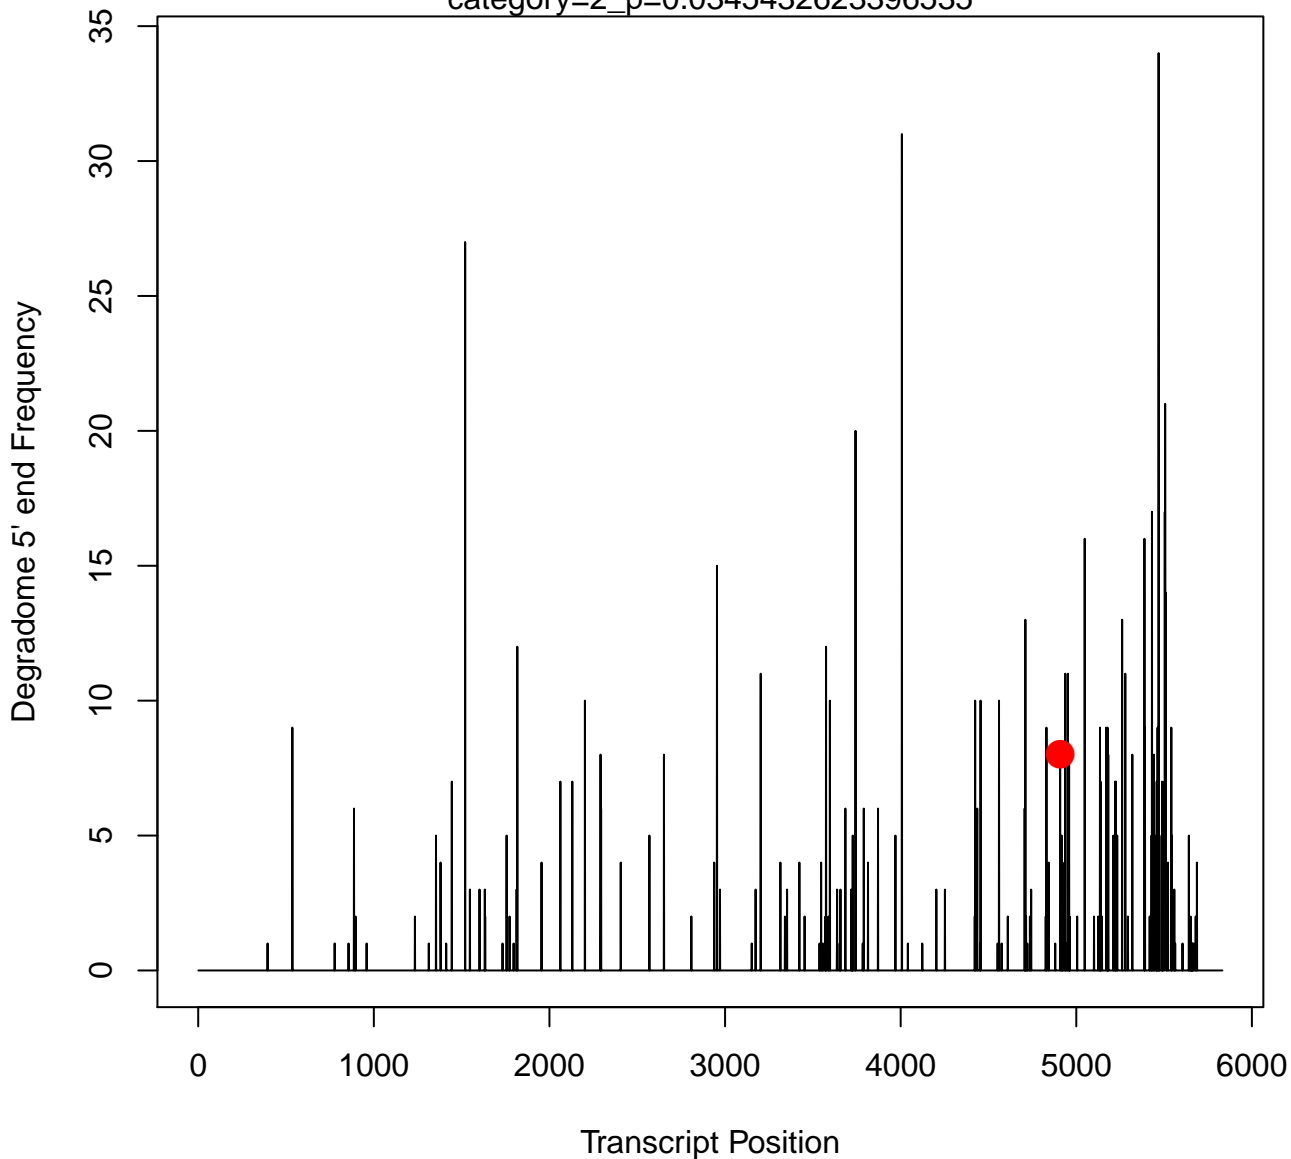

Supplement: Data_Sheet_1.zip [file Data_Sheet_1.zip]

**T=evm.model.LG04.3983\_Q=miRN2b-3p\_S=95**

category=2\_p=0.042990999752487

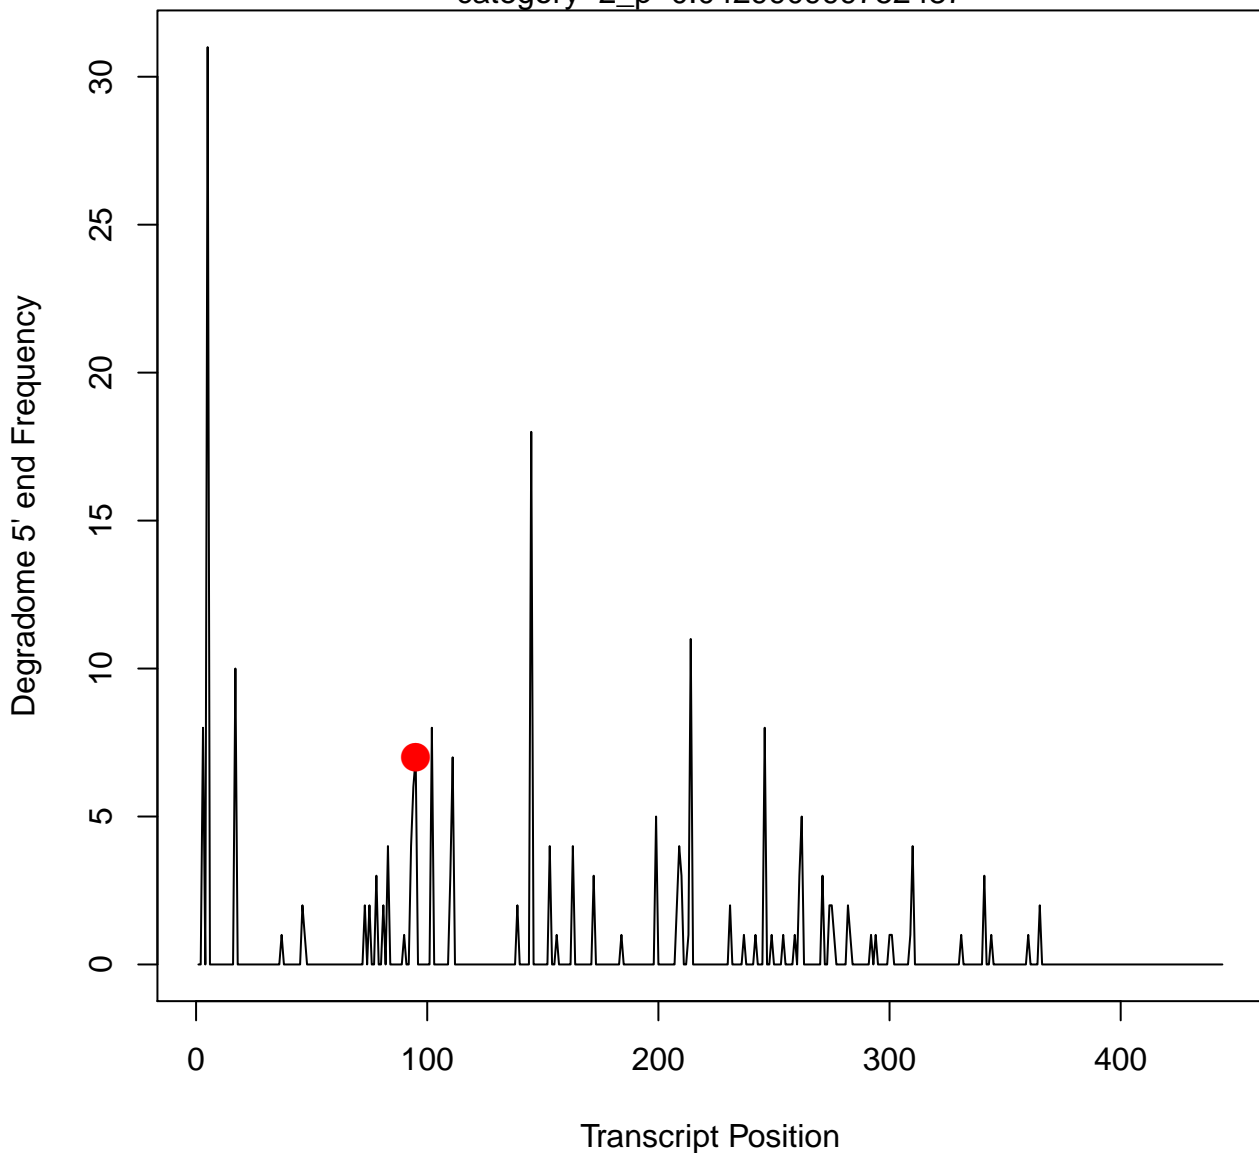

Supplement: Data_Sheet_1.zip [file Data_Sheet_1.zip]

**T=evm.model.LG04.831\_Q=miR414-5p\_S=2593**

category=2\_p=0.00874999063480097

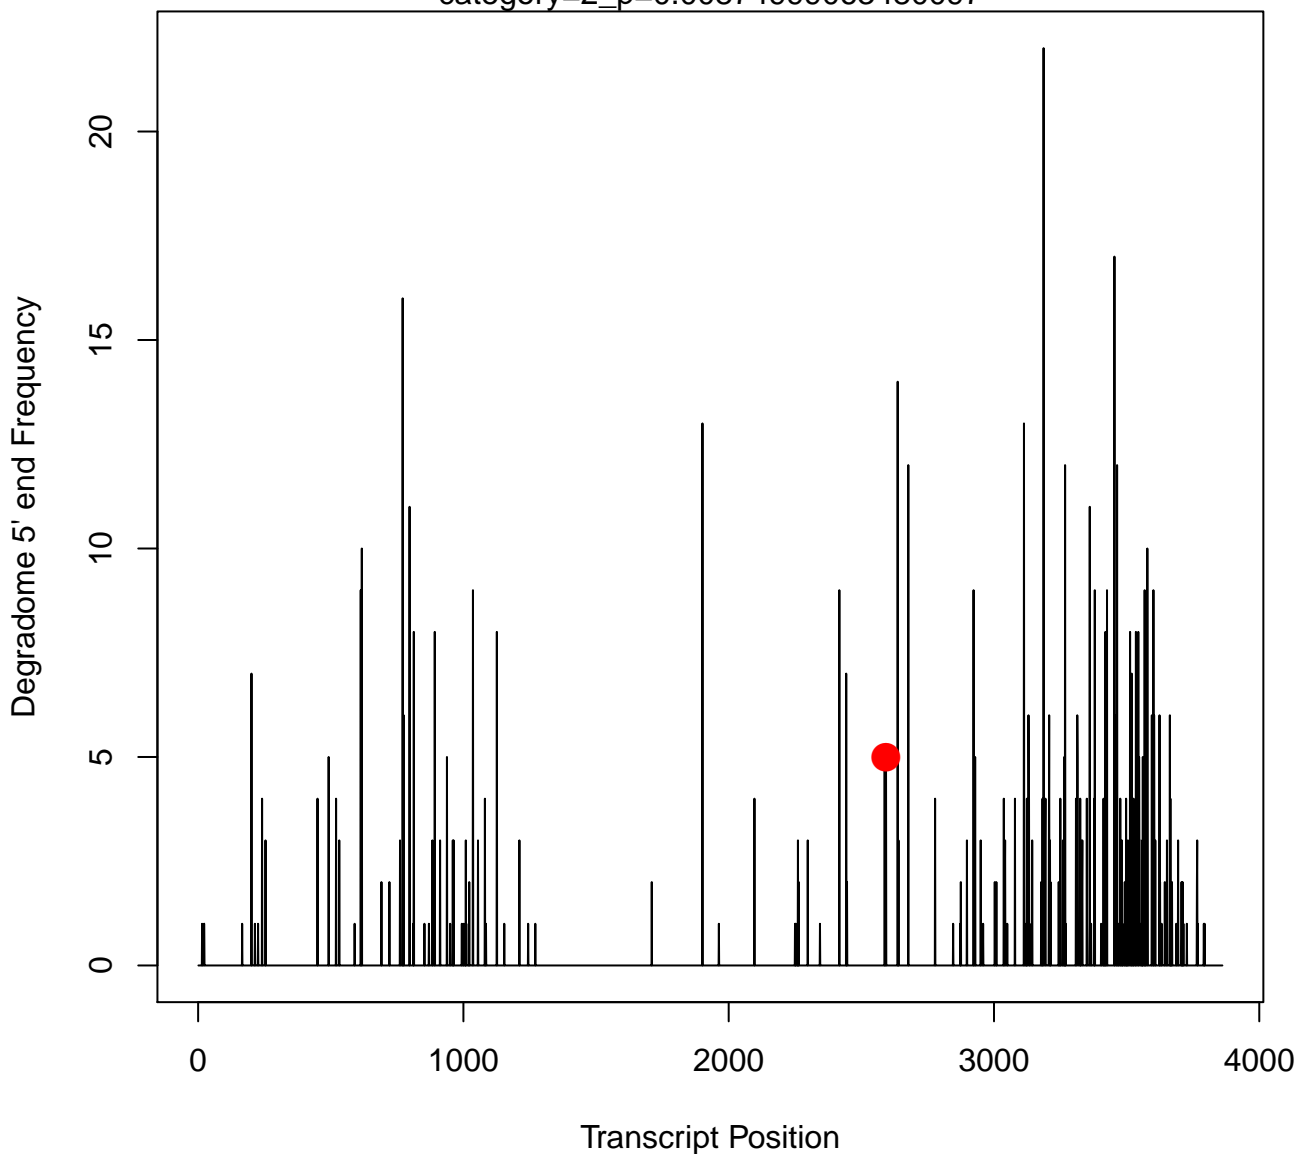

Supplement: Data_Sheet_1.zip [file Data_Sheet_1.zip]

**T=evm.model.LG03.1086\_Q=miR171i-3p\_S=491**

category=0\_p=0.00207487934604456

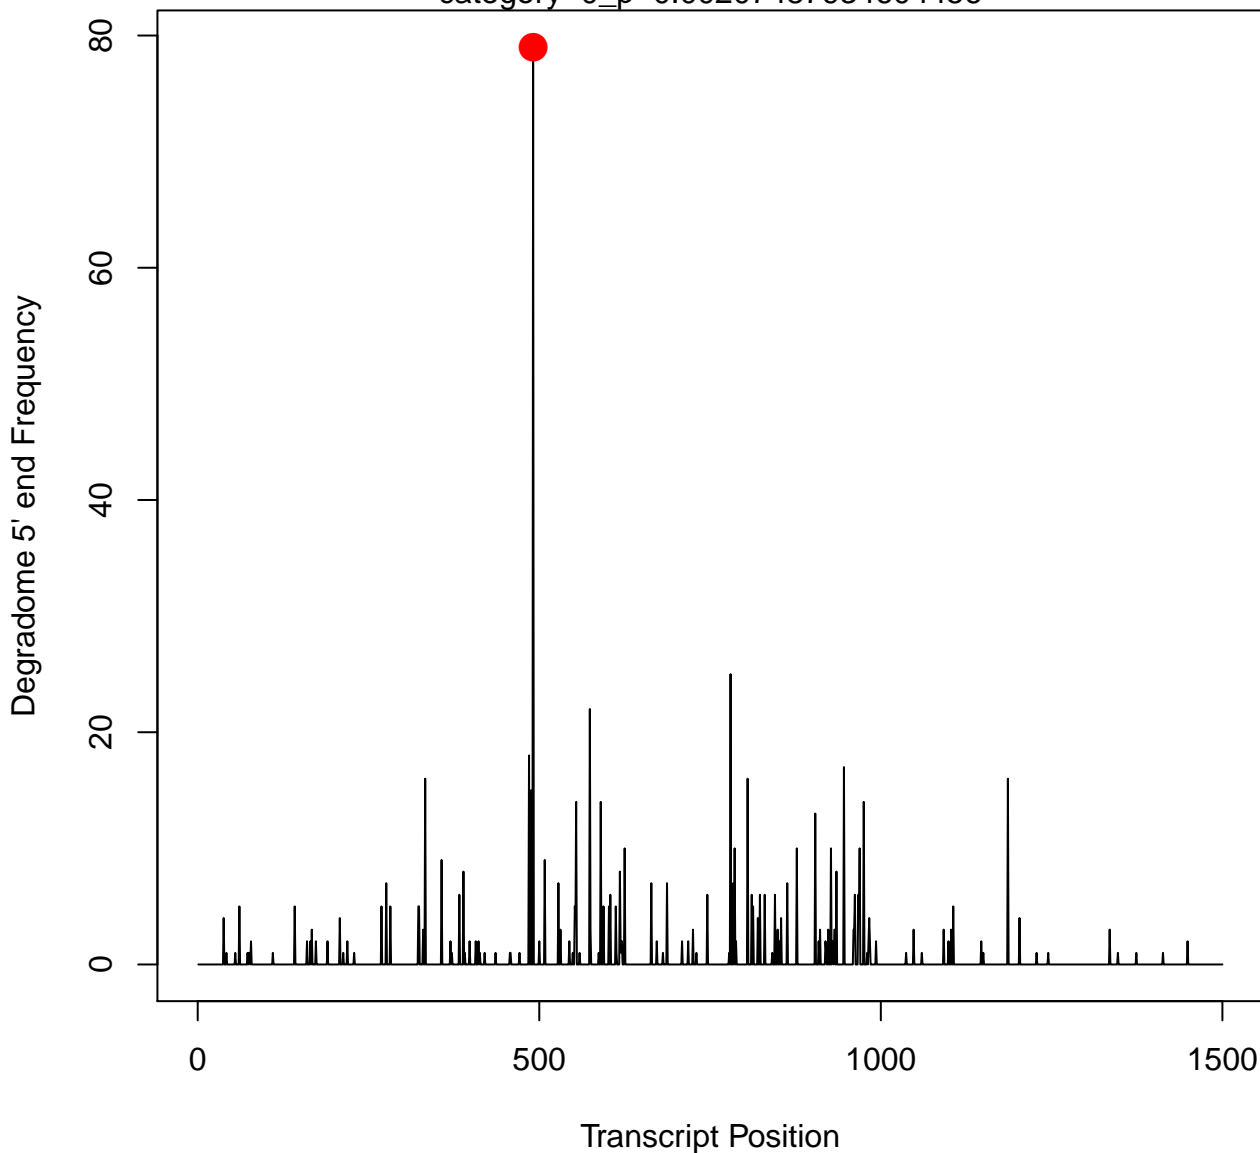

Supplement: Data_Sheet_1.zip [file Data_Sheet_1.zip]

**T=evm.model.LG08.846\_Q=miRN1a-3p\_S=203**

category=0\_p=0.0159681557397247

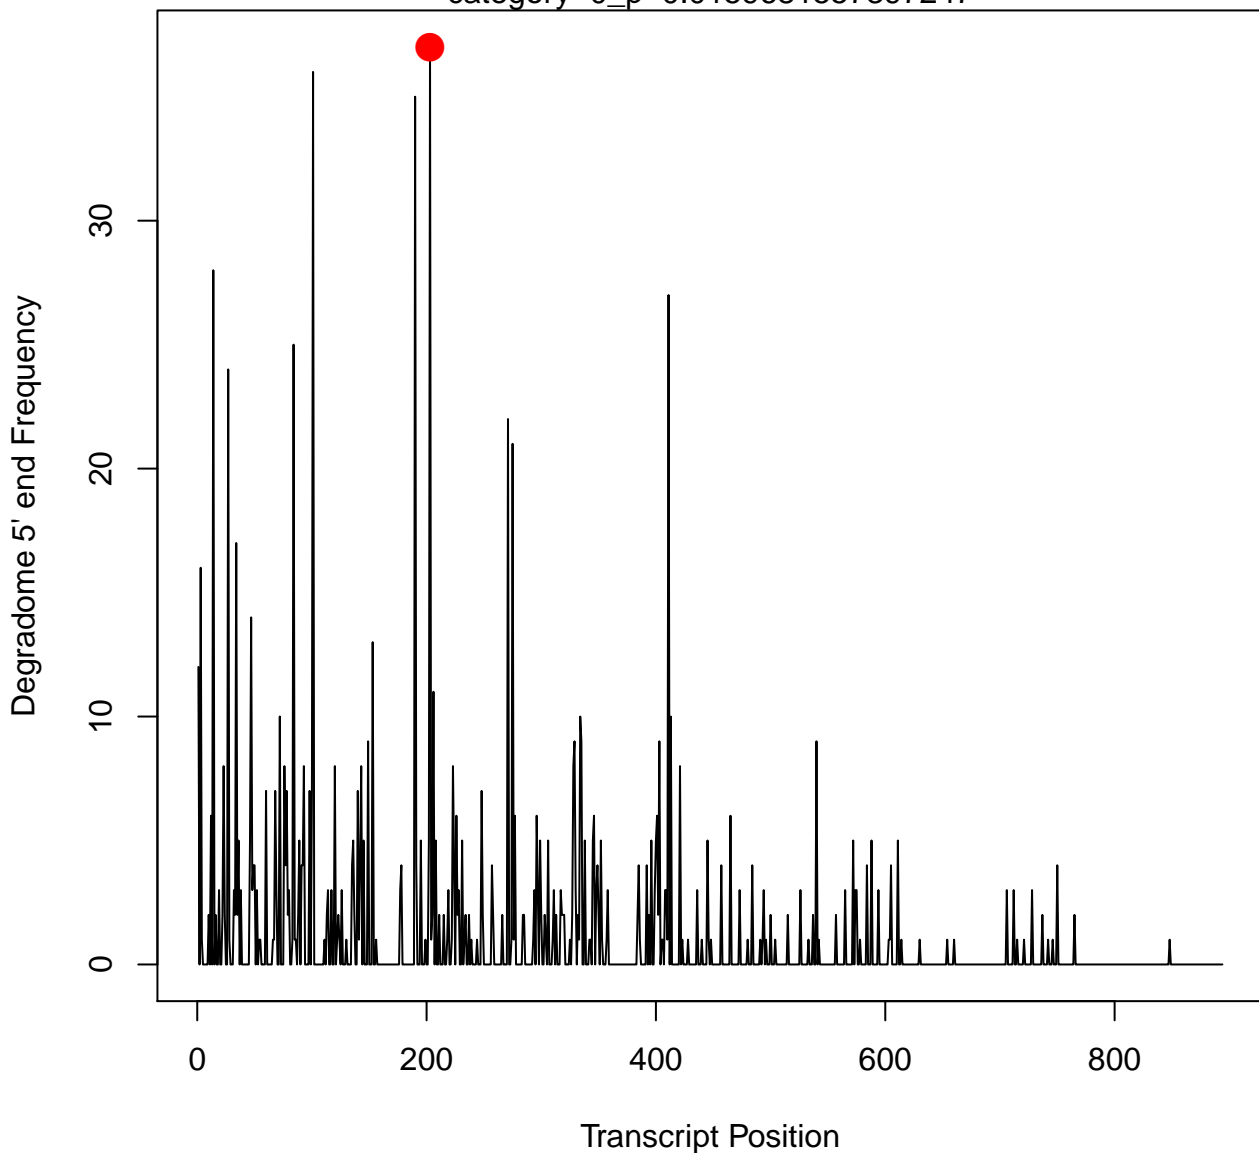

Supplement: Data_Sheet_1.zip [file Data_Sheet_1.zip]

**T=evm.model.LG02.3374\_Q=miR319a-3p\_S=859**

category=0\_p=0.0169895595119902

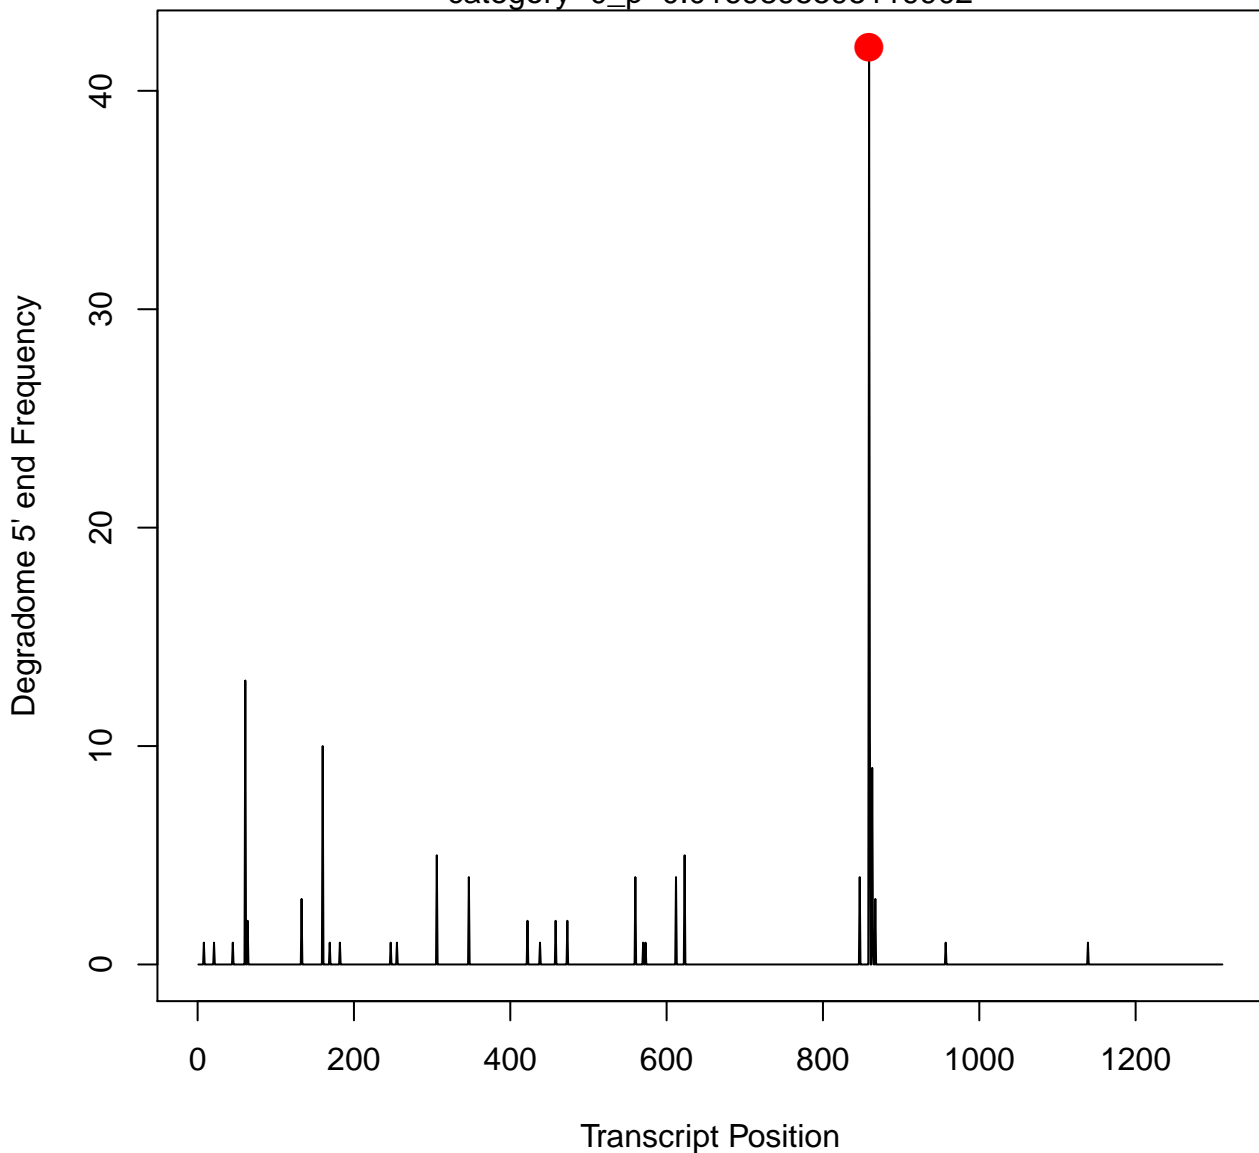

Supplement: Data_Sheet_1.zip [file Data_Sheet_1.zip]

**T=evm.model.LG03.2517\_Q=miR164e-5p\_S=649**

category=0\_p=0.00155656346427469

Degradome 5' end Frequency

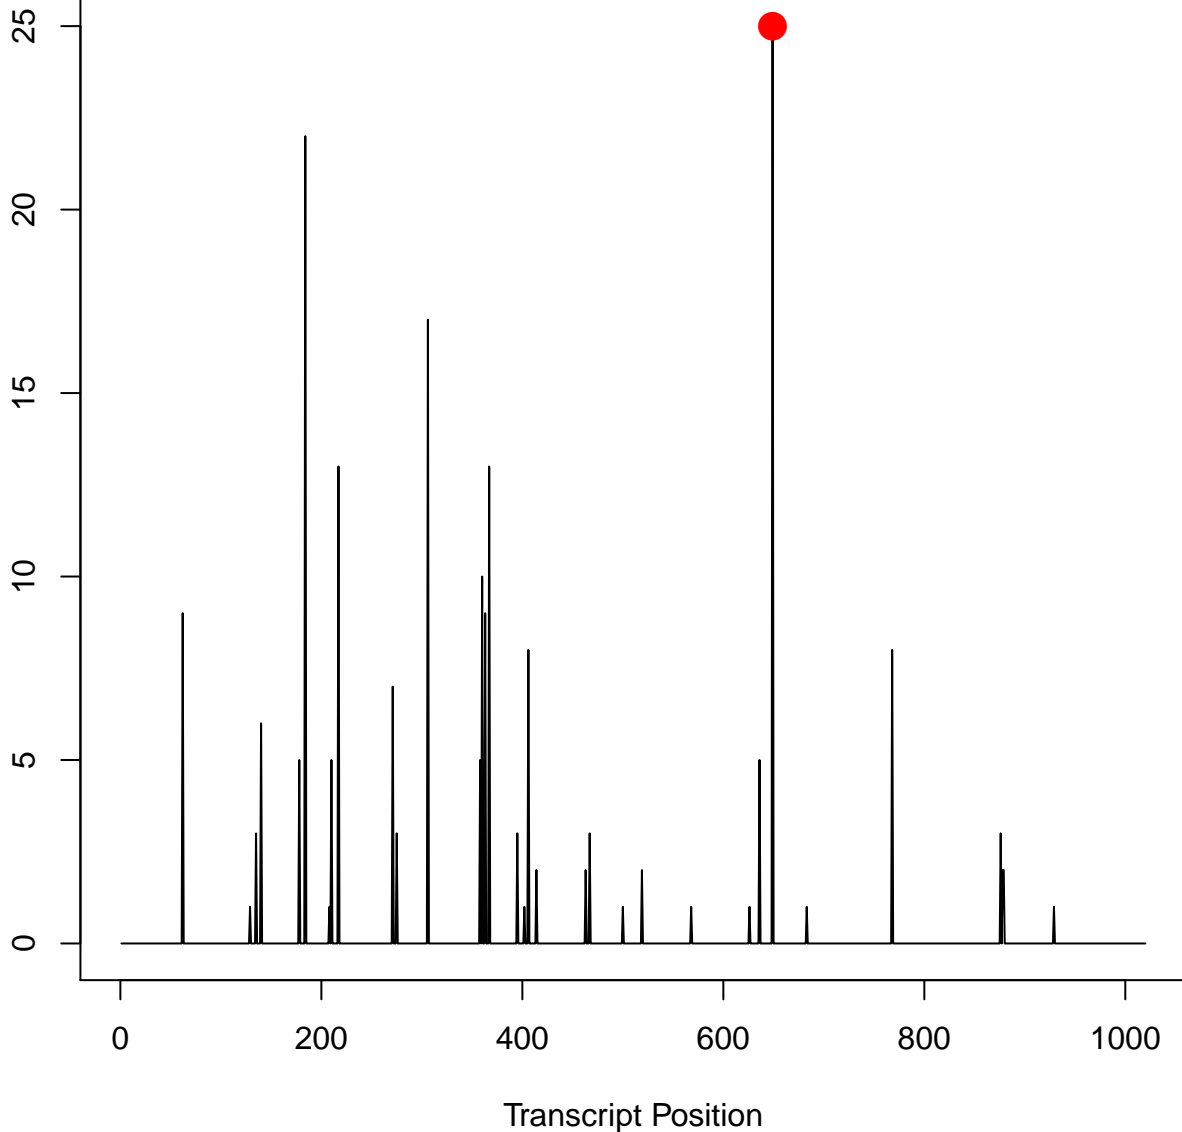

Supplement: Data_Sheet_1.zip [file Data_Sheet_1.zip]

**T=evm.model.LG01.7680\_Q=miRN5-3p\_S=1218**

category=2\_p=0.042990999752487

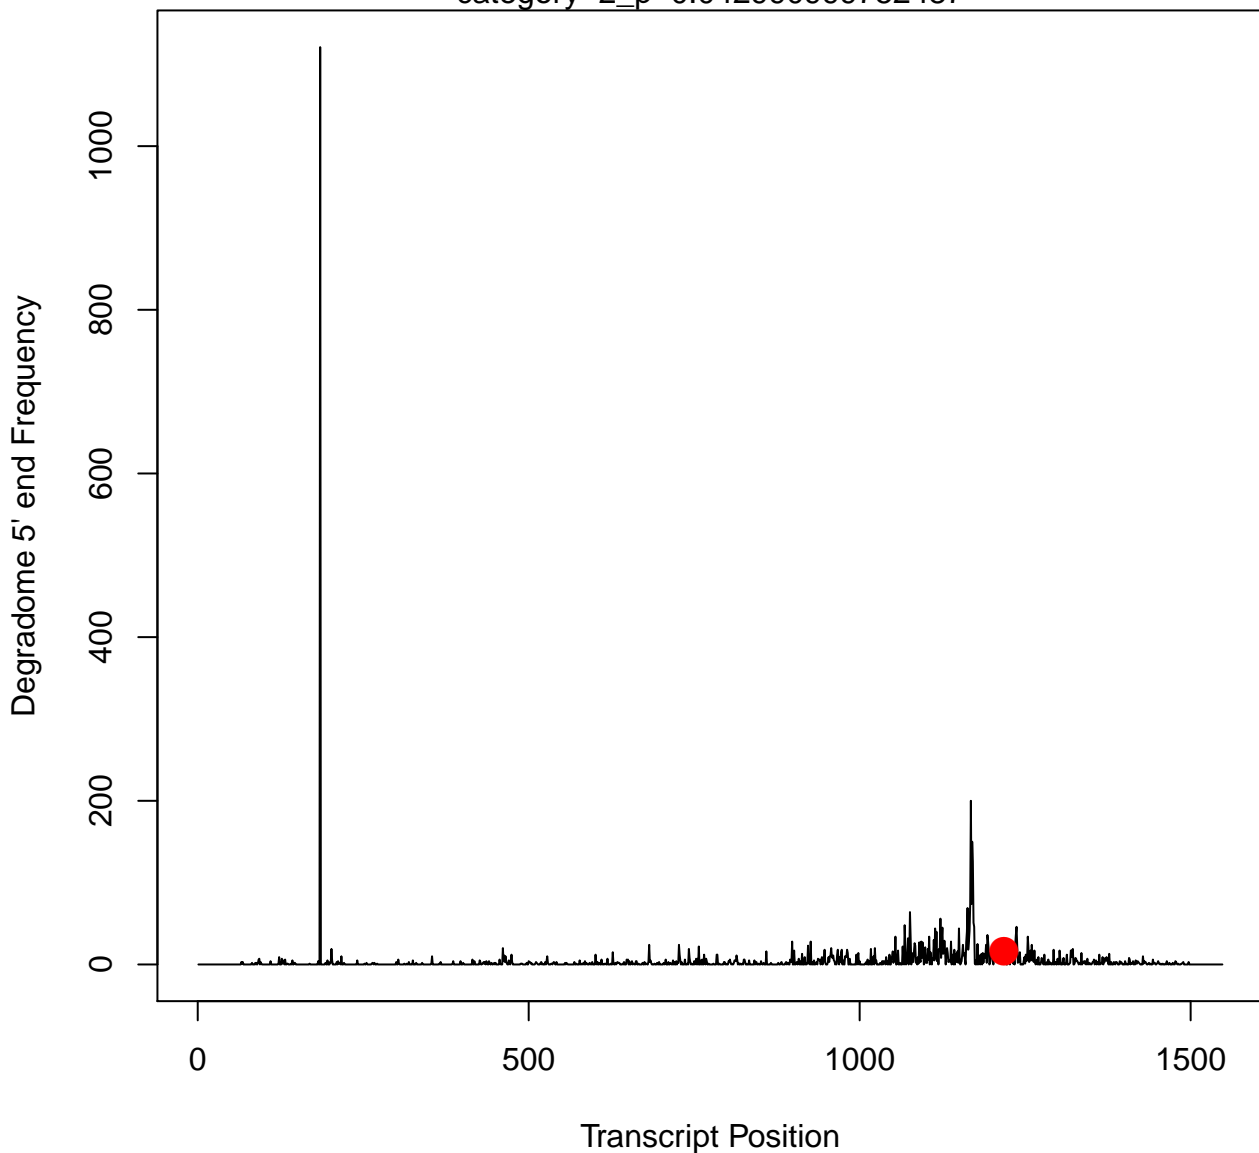

Supplement: Data_Sheet_1.zip [file Data_Sheet_1.zip]

**T=evm.model.LG02.5698\_Q=miR171c-3p\_S=1058**

category=2\_p=0.0260209548157995

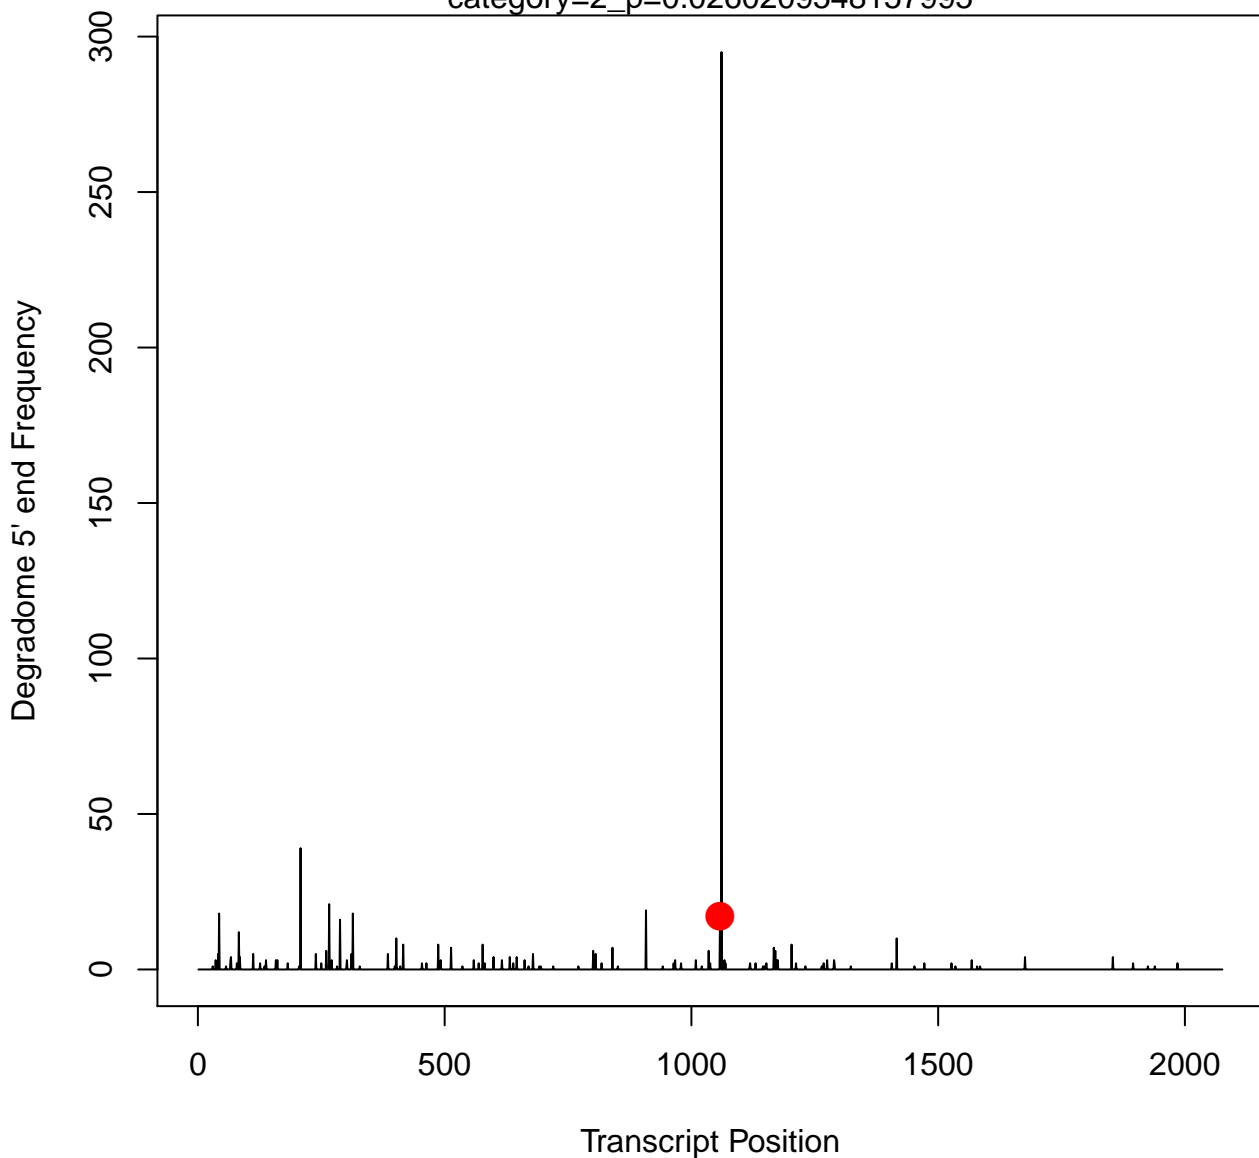

Supplement: Data_Sheet_1.zip [file Data_Sheet_1.zip]

**T=evm.model.LG02.985\_Q=miR482-3p\_S=46**

category=0\_p=0.00051912393111464

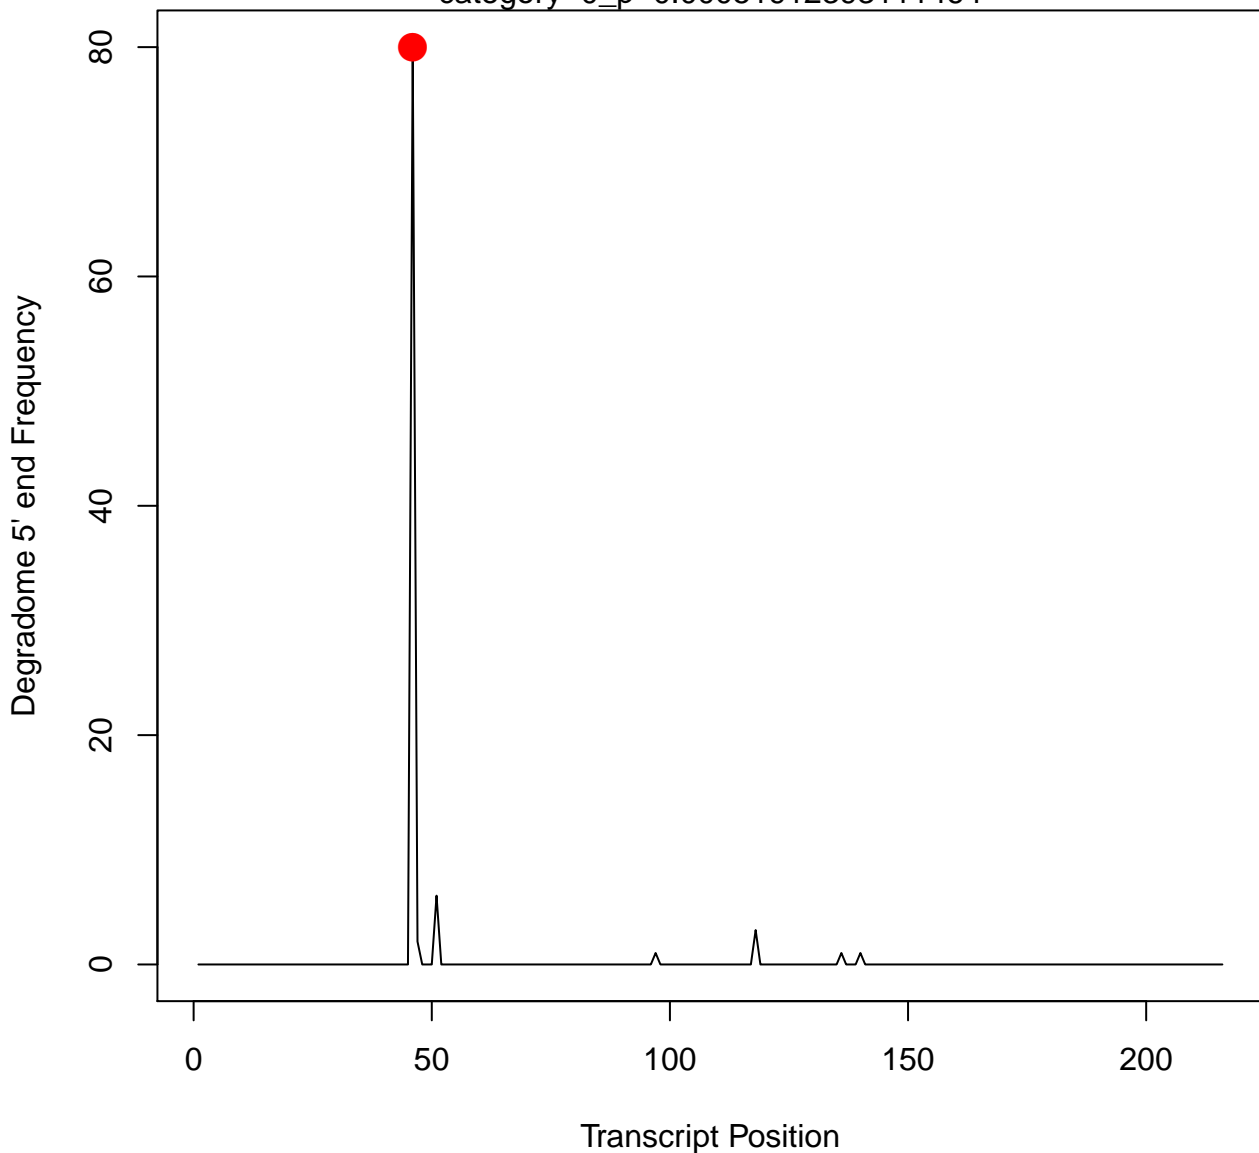

Supplement: Data_Sheet_1.zip [file Data_Sheet_1.zip]

**T=evm.model.LG02.5698\_Q=miR171a-3p\_S=1061**

category=0\_p=0.00051912393111464

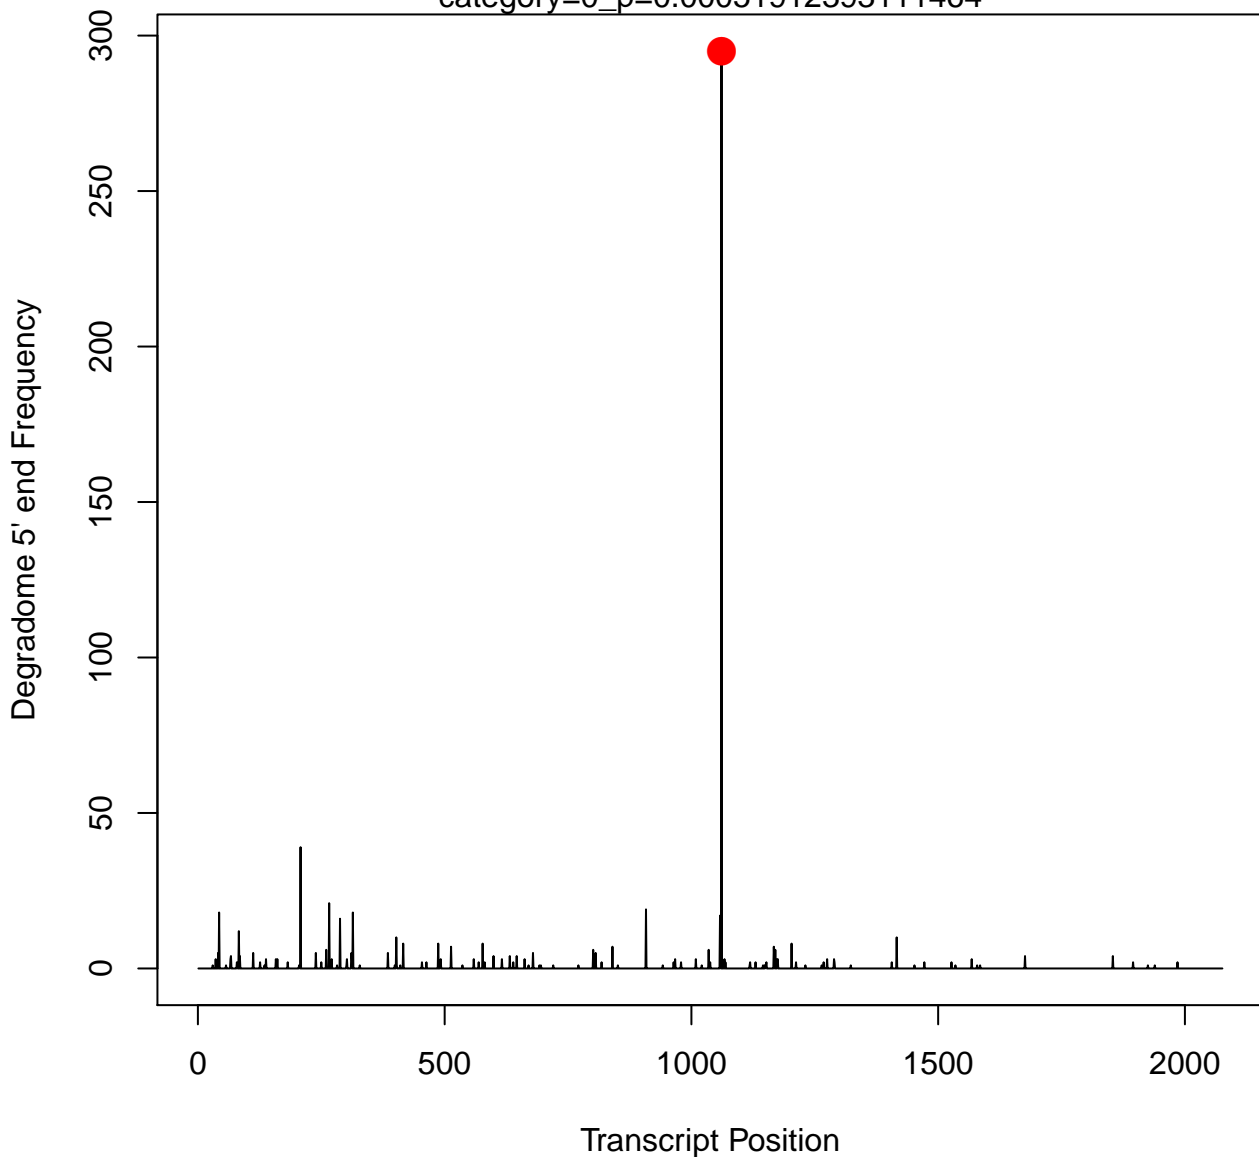

Supplement: Data_Sheet_1.zip [file Data_Sheet_1.zip]

**T=evm.model.LG02.1320\_Q=miR319b-5p\_S=142**

category=1\_p=0.0289849666398476

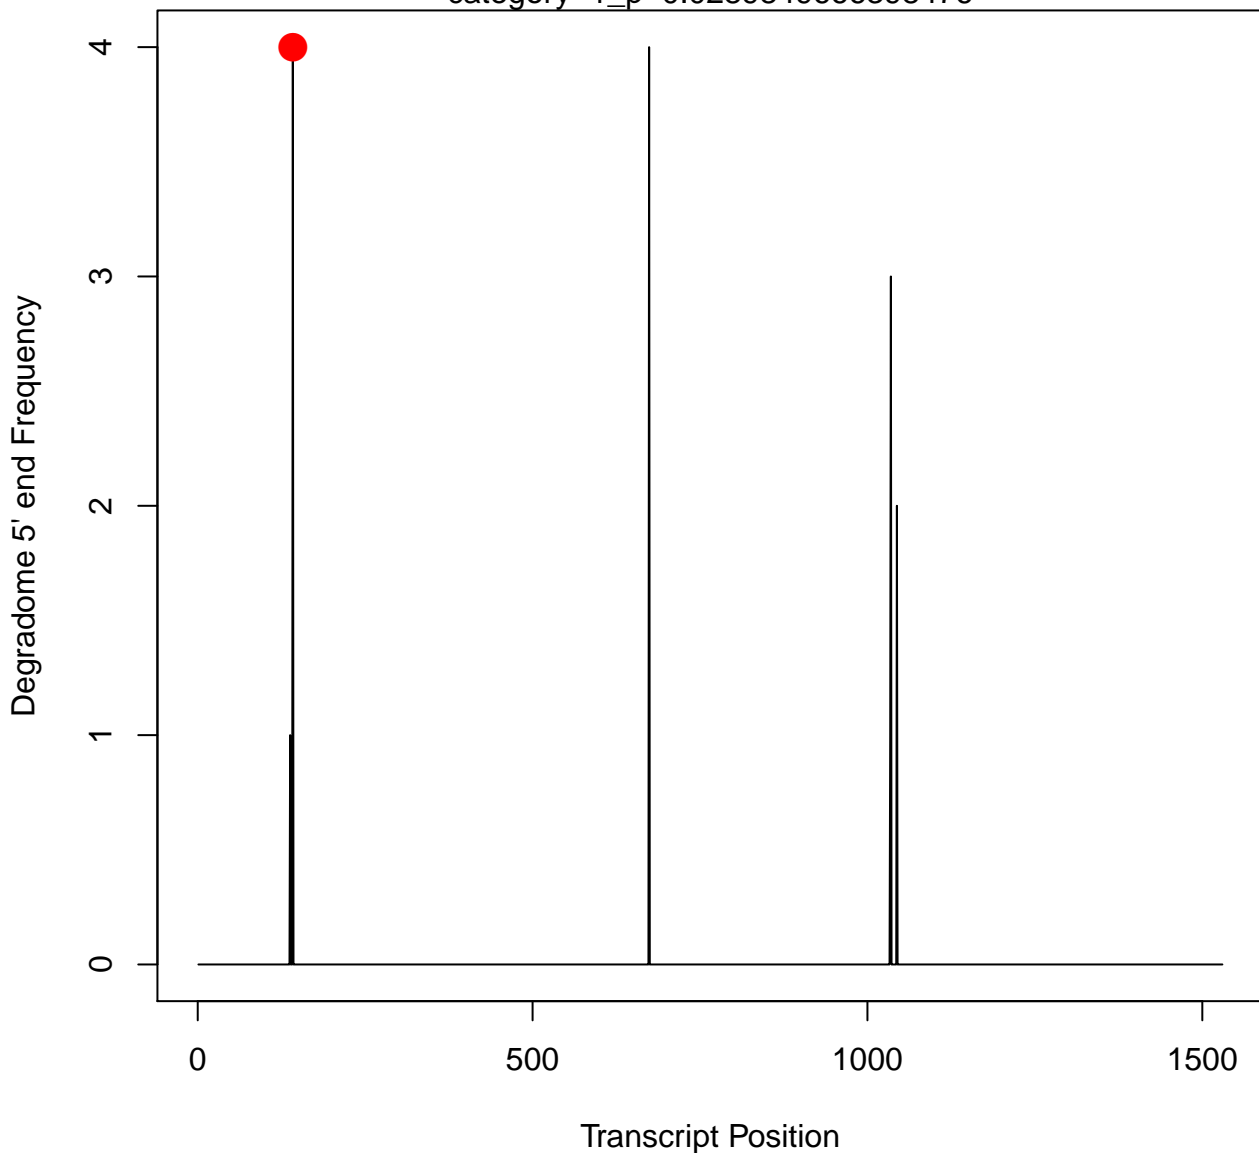

Supplement: Data_Sheet_1.zip [file Data_Sheet_1.zip]

**T=evm.model.LG02.1997\_Q=miR159a-3p\_S=739**

category=0\_p=0.0113586892874949

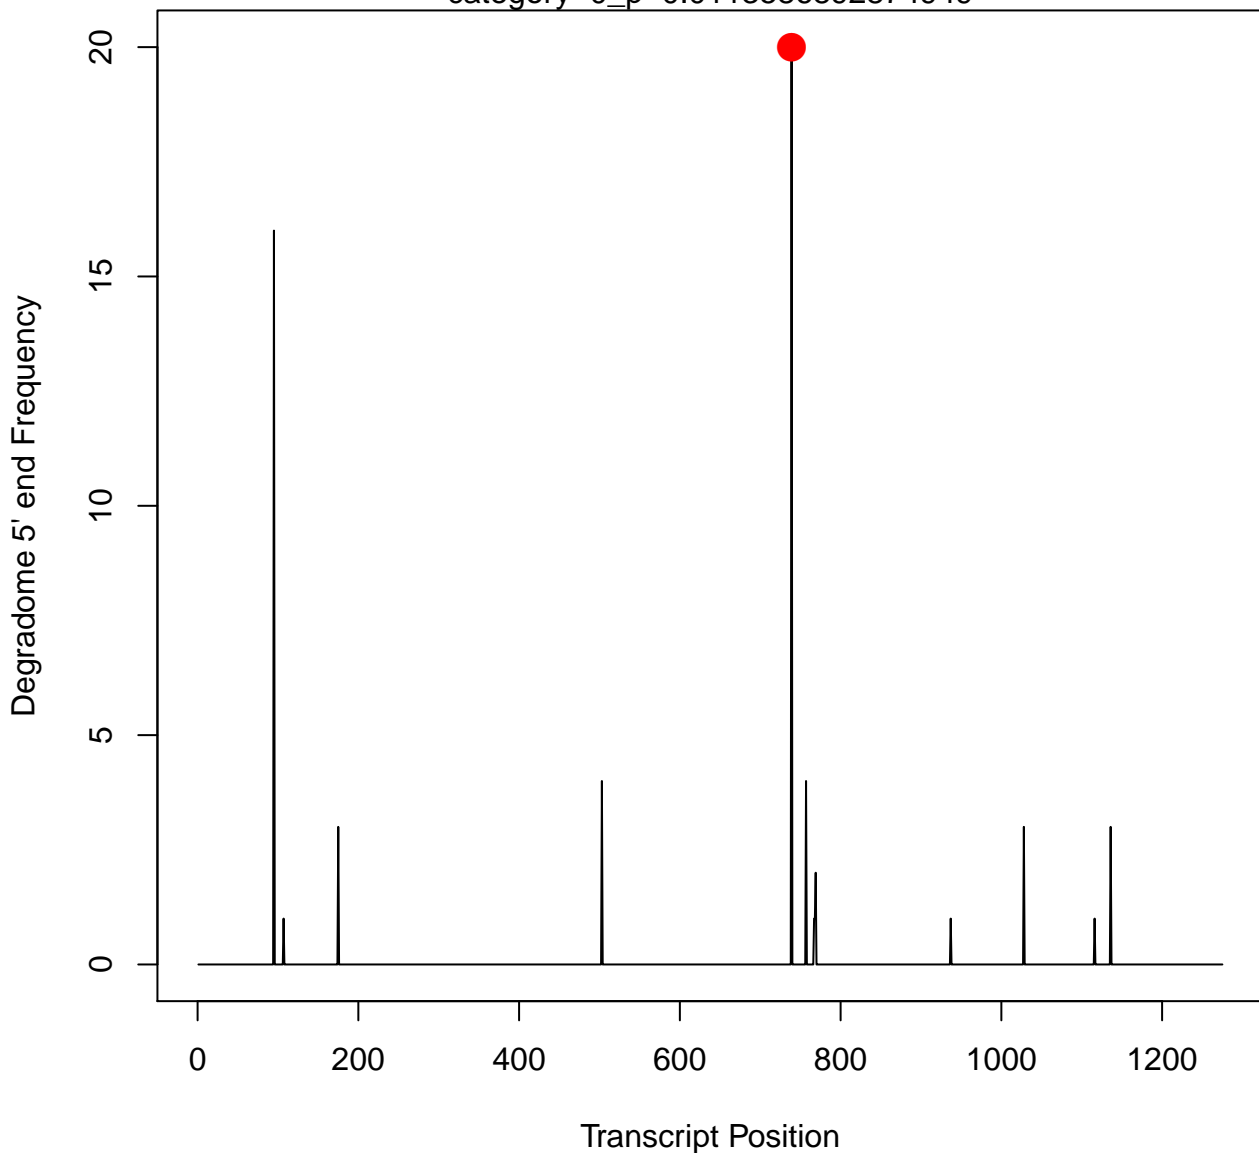

Supplement: Data_Sheet_1.zip [file Data_Sheet_1.zip]

**T=evm.model.LG06.3953\_Q=miR319d-3p\_S=1139**

category=2\_p=0.0174234189334928

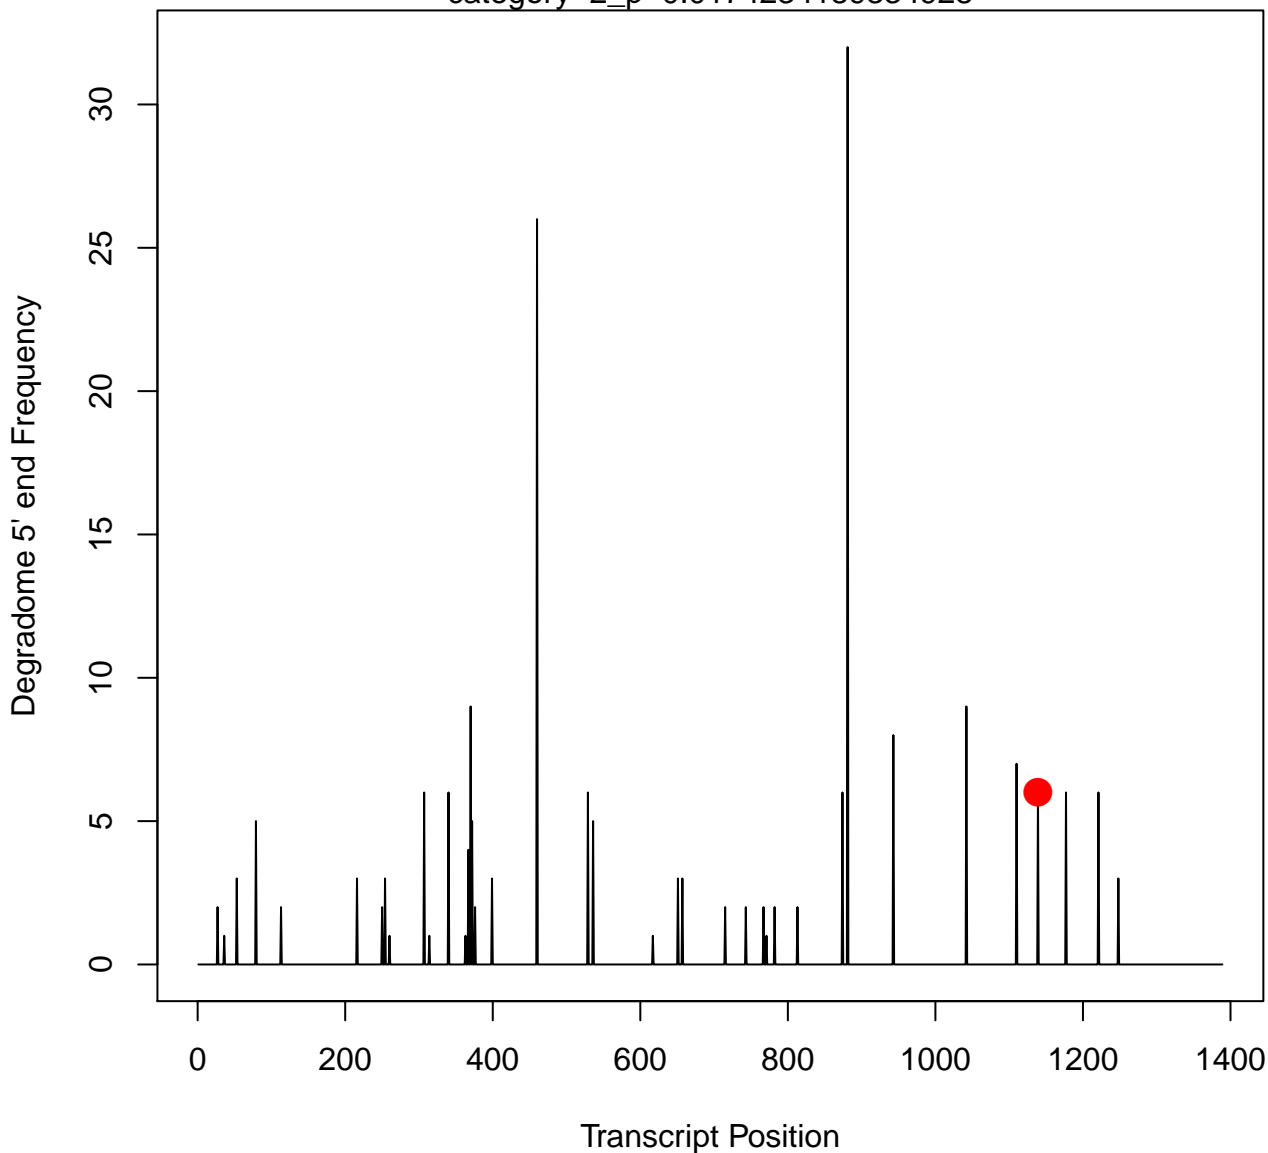

Supplement: Data_Sheet_1.zip [file Data_Sheet_1.zip]

**T=evm.model.LG04.958\_Q=miR393b-5p\_S=36**

category=4\_p=0.0423765939260693

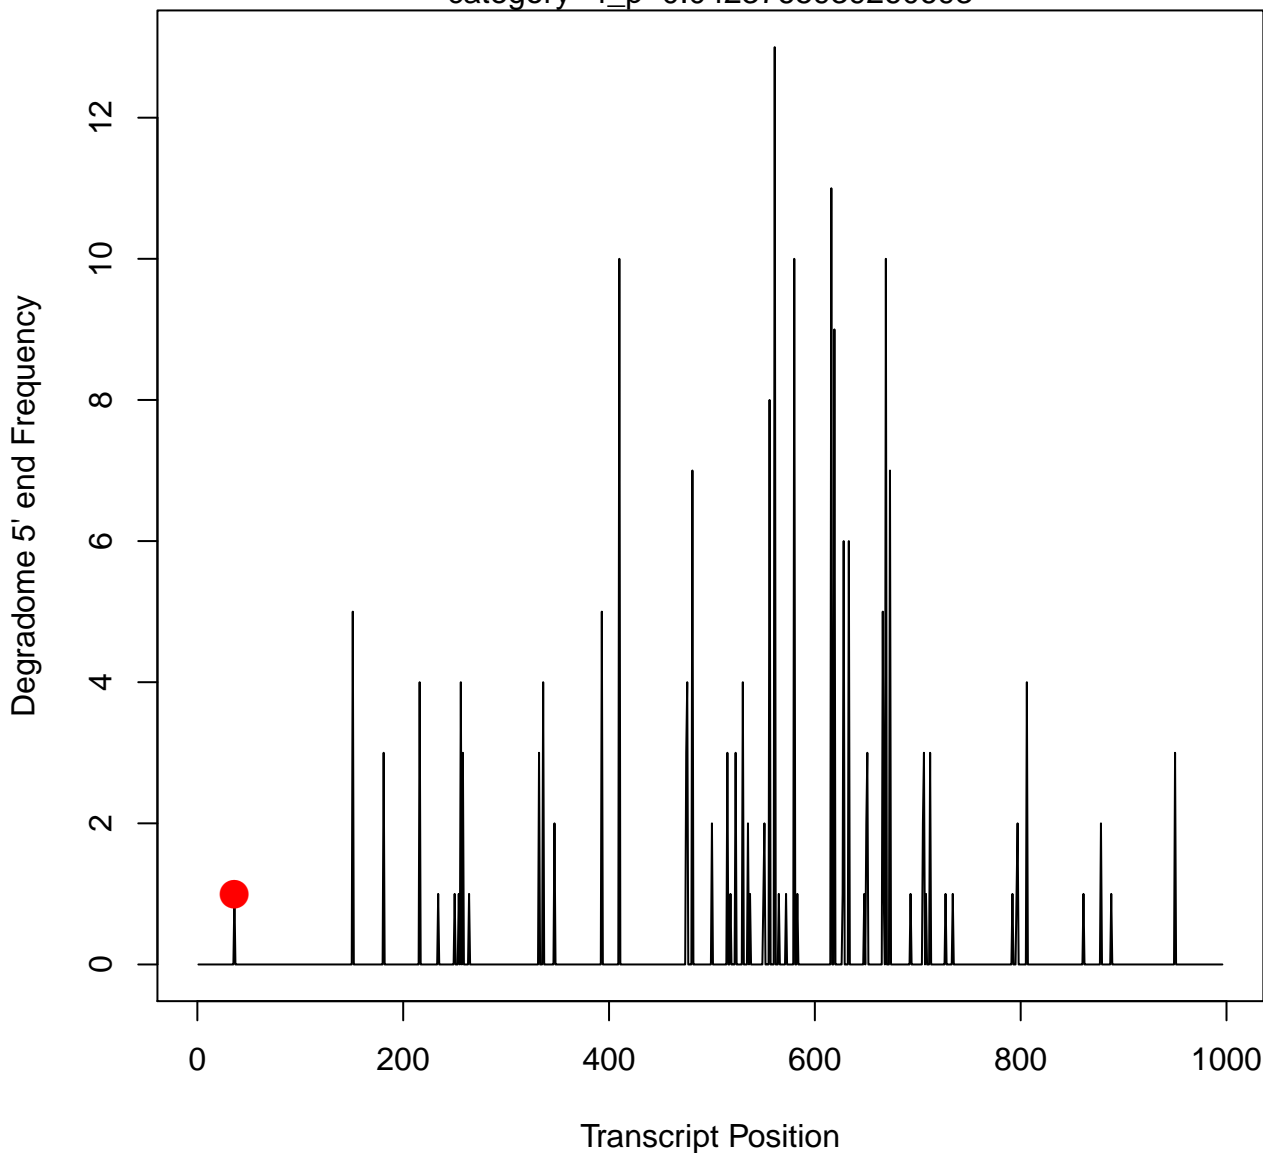

Supplement: Data_Sheet_1.zip [file Data_Sheet_1.zip]

**T=evm.model.LG01.6149\_Q=miR160d-5p\_S=1325**

category=0\_p=0.00207487934604456



Supplement: Data_Sheet_1.zip [file Data_Sheet_1.zip]

**T=evm.model.LG04.3338\_Q=miRN11-5p\_S=994**

category=2\_p=0.0260209548157995

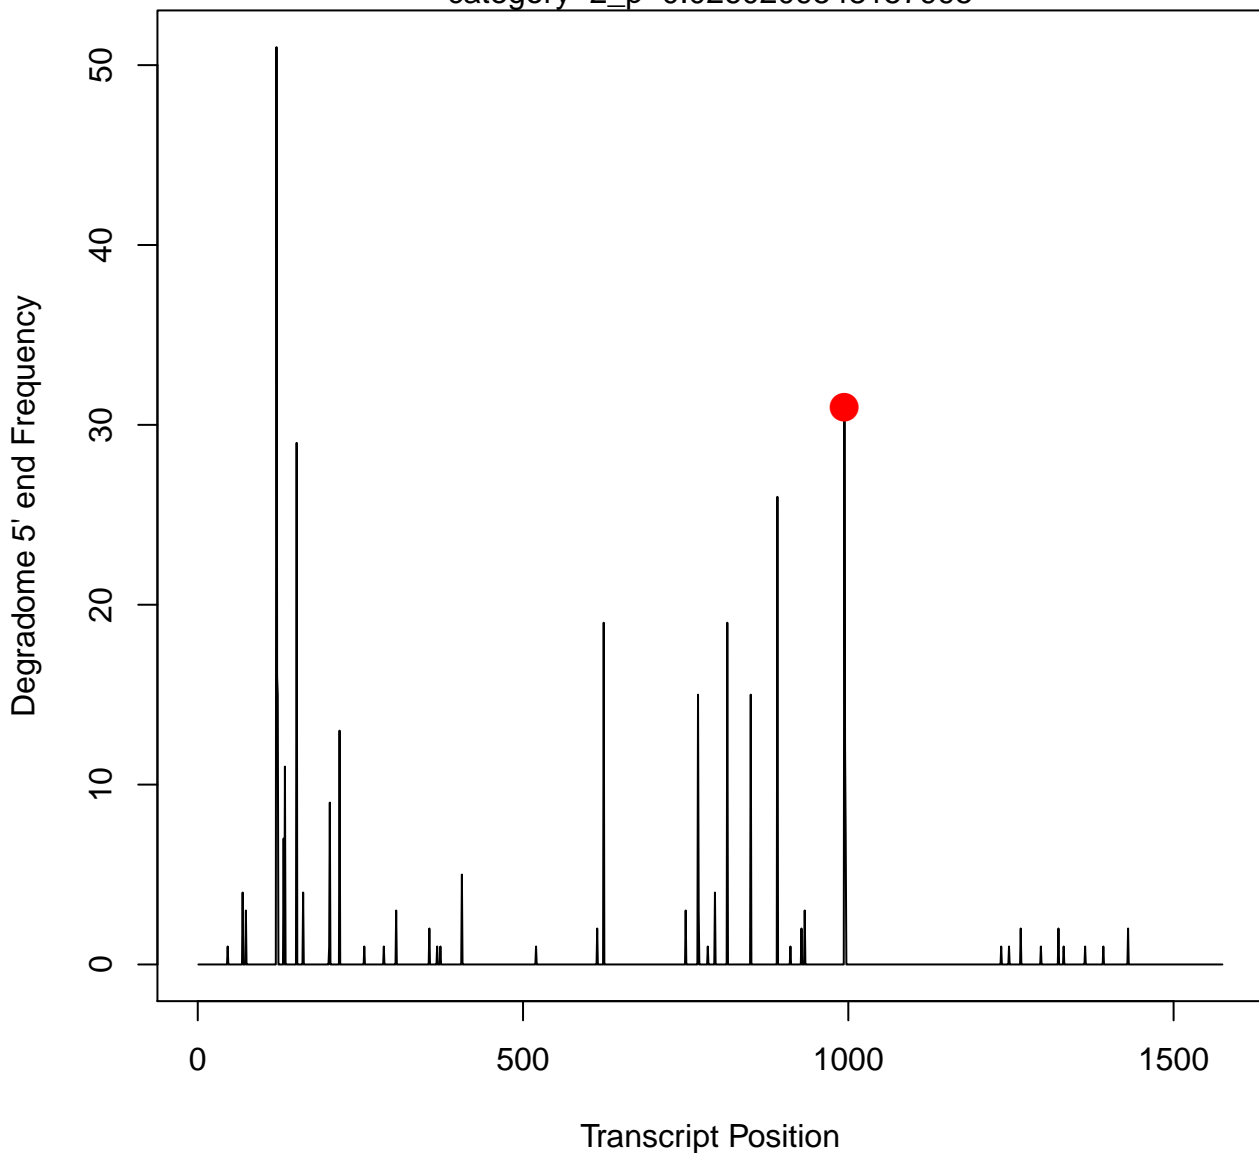

Supplement: Data_Sheet_1.zip [file Data_Sheet_1.zip]

**T=evm.model.LG06.3352\_Q=miRN14-5p\_S=443**

category=3\_p=0.0241449679652586

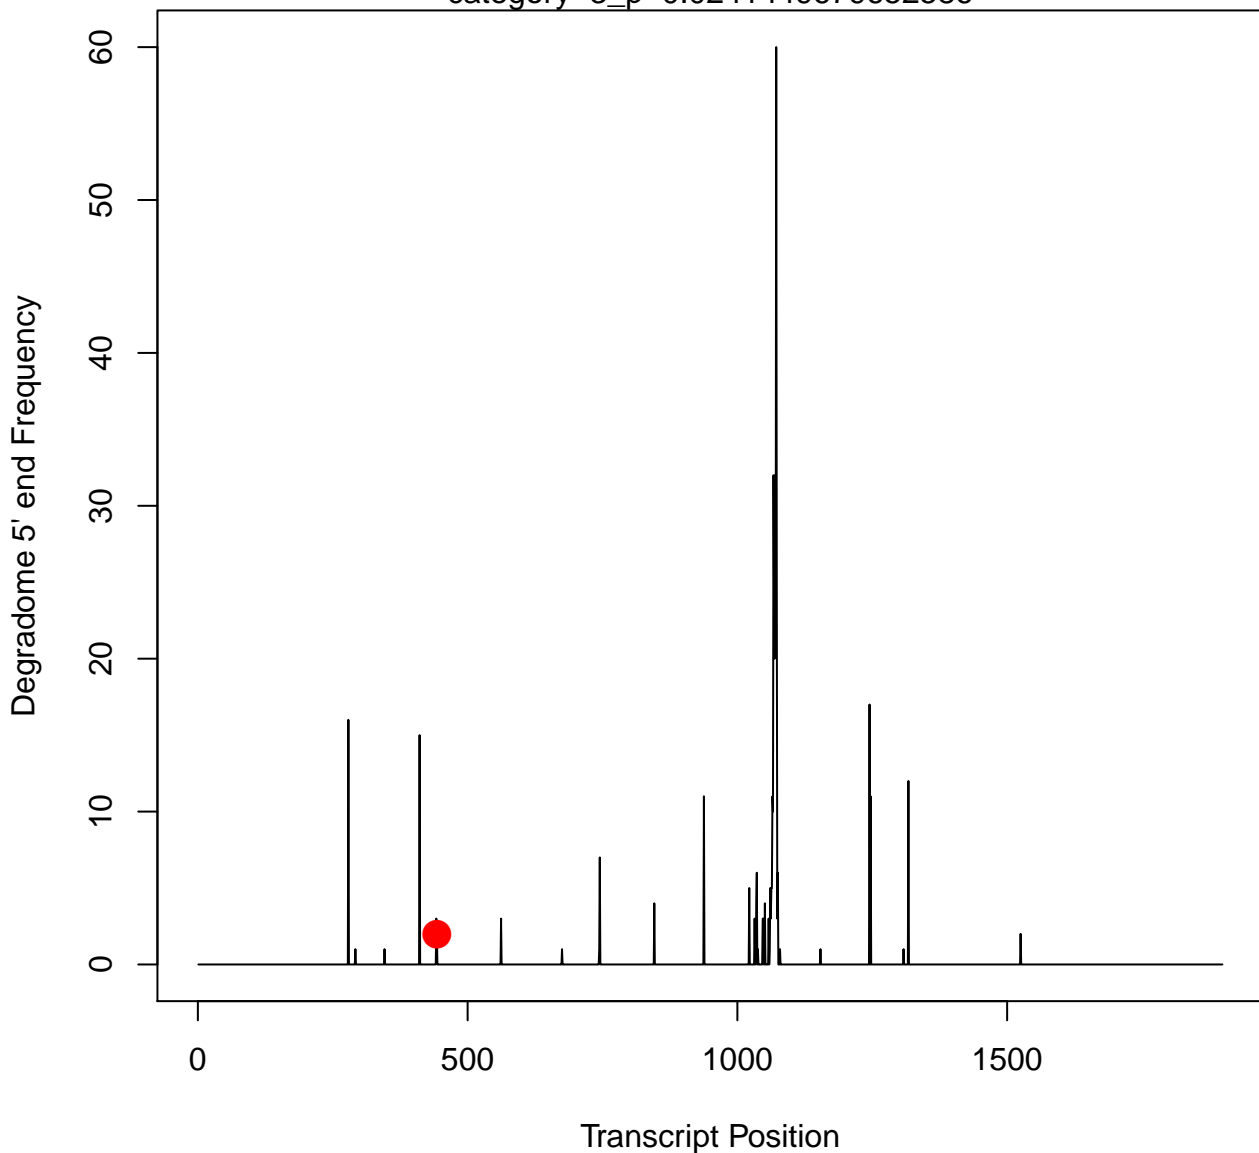

Supplement: Data_Sheet_1.zip [file Data_Sheet_1.zip]

**T=evm.model.LG06.176\_Q=miRN24-5p\_S=78**

category=0\_p=0.0311783909995083

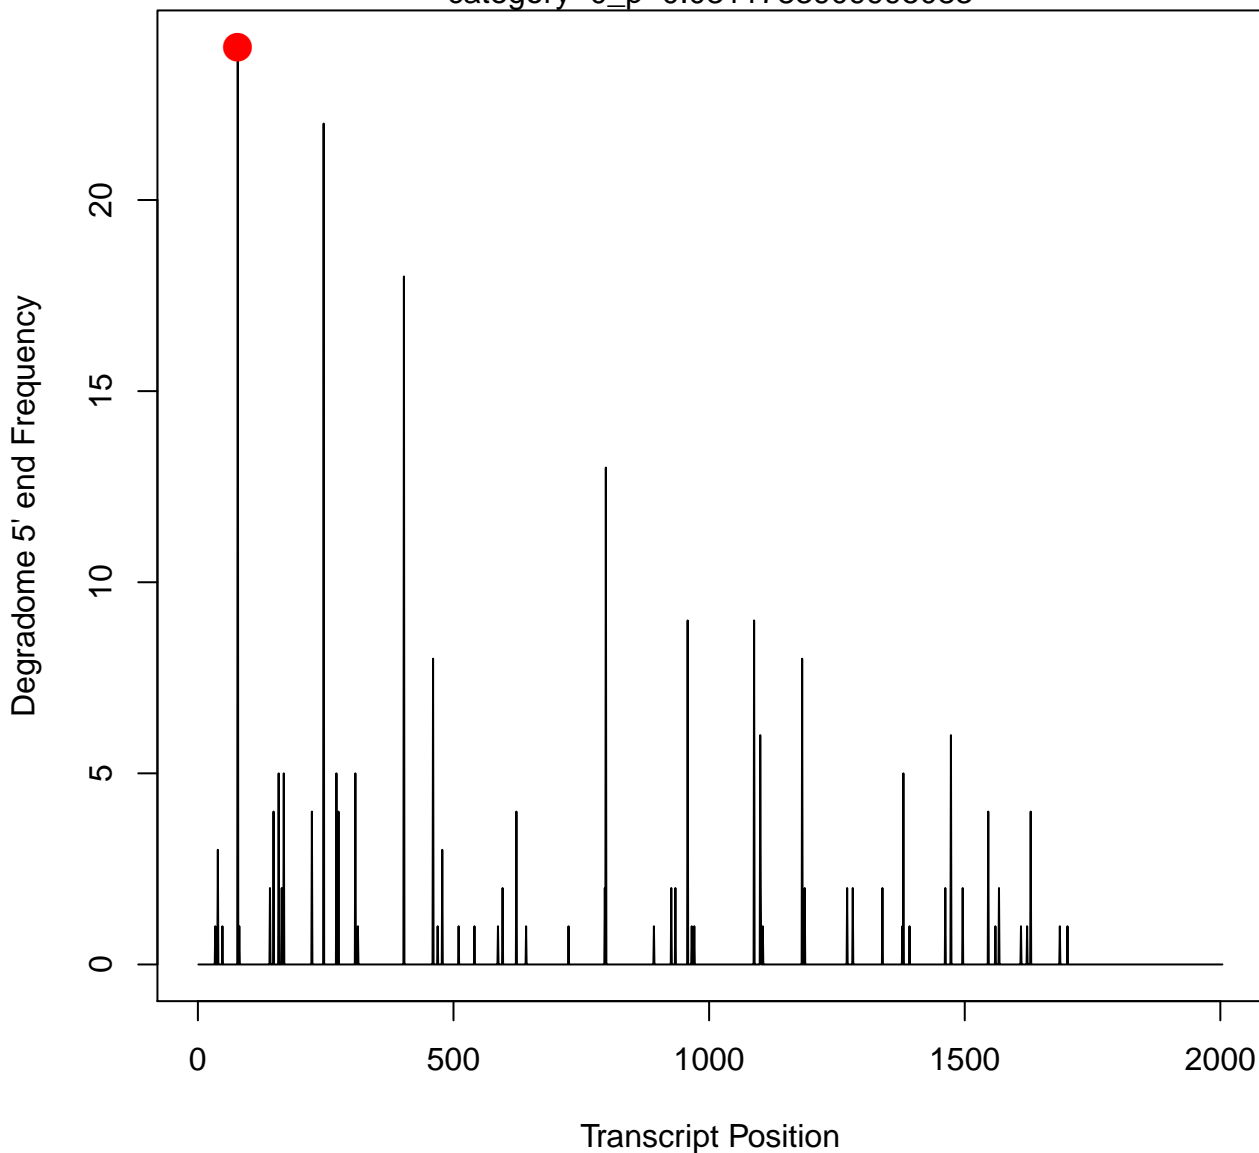

Supplement: Data_Sheet_1.zip [file Data_Sheet_1.zip]

**T=evm.model.LG03.2778\_Q=miR166j-3p\_S=550**

category=2\_p=0.0174234189334928

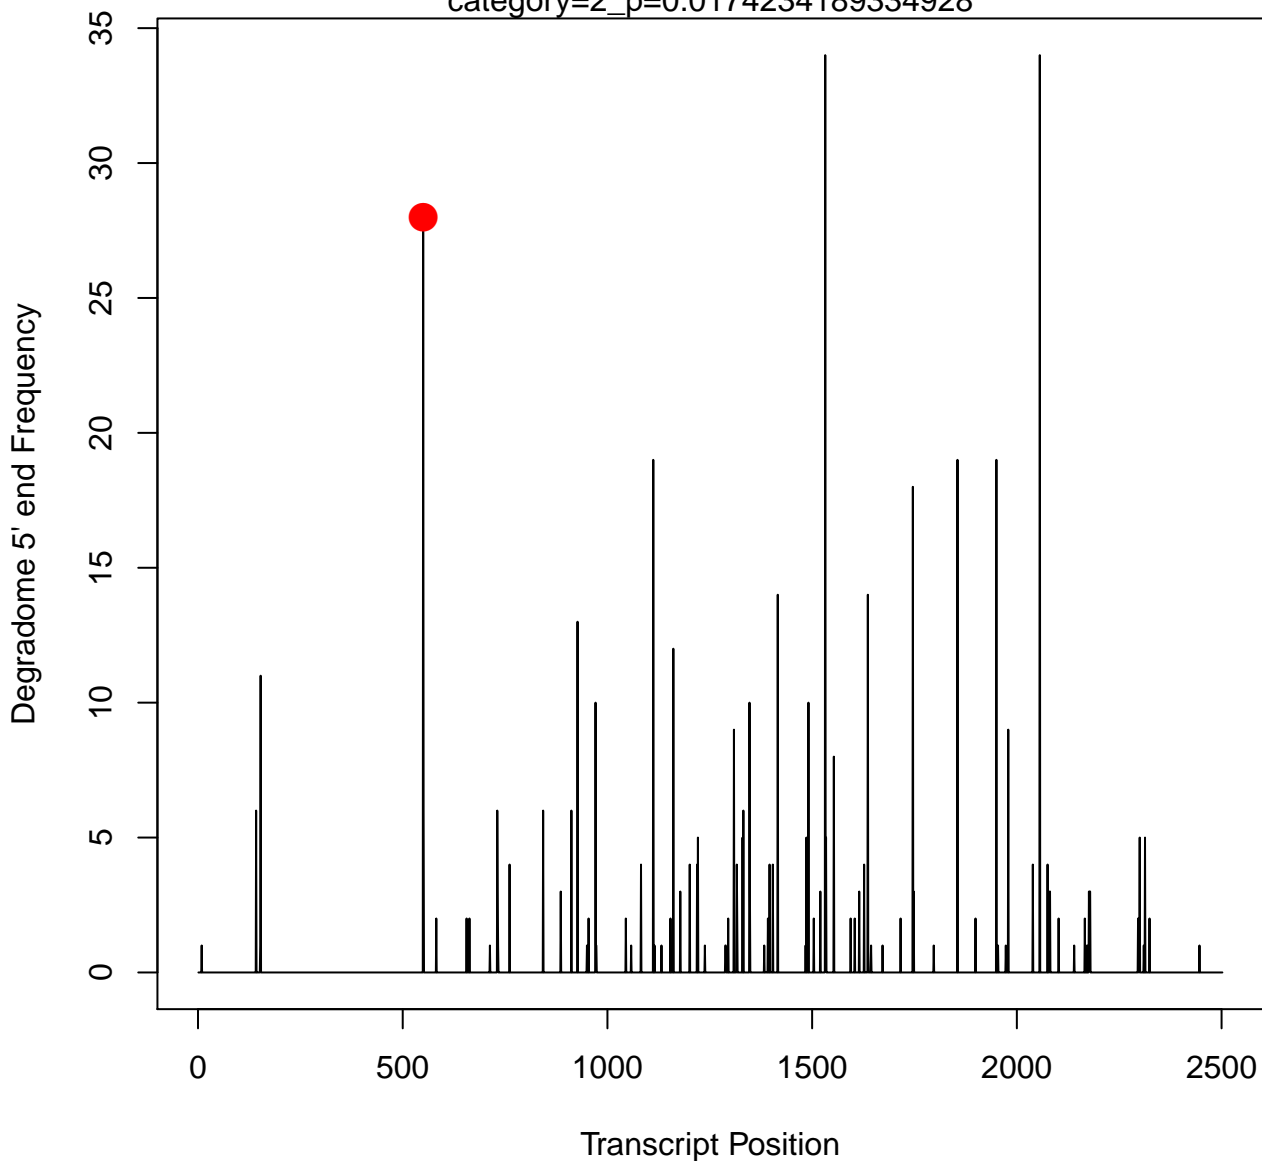

Supplement: Data_Sheet_1.zip [file Data_Sheet_1.zip]

**T=evm.model.LG04.896\_Q=miR396a-5p\_S=374**

category=0\_p=0.00362821312893646

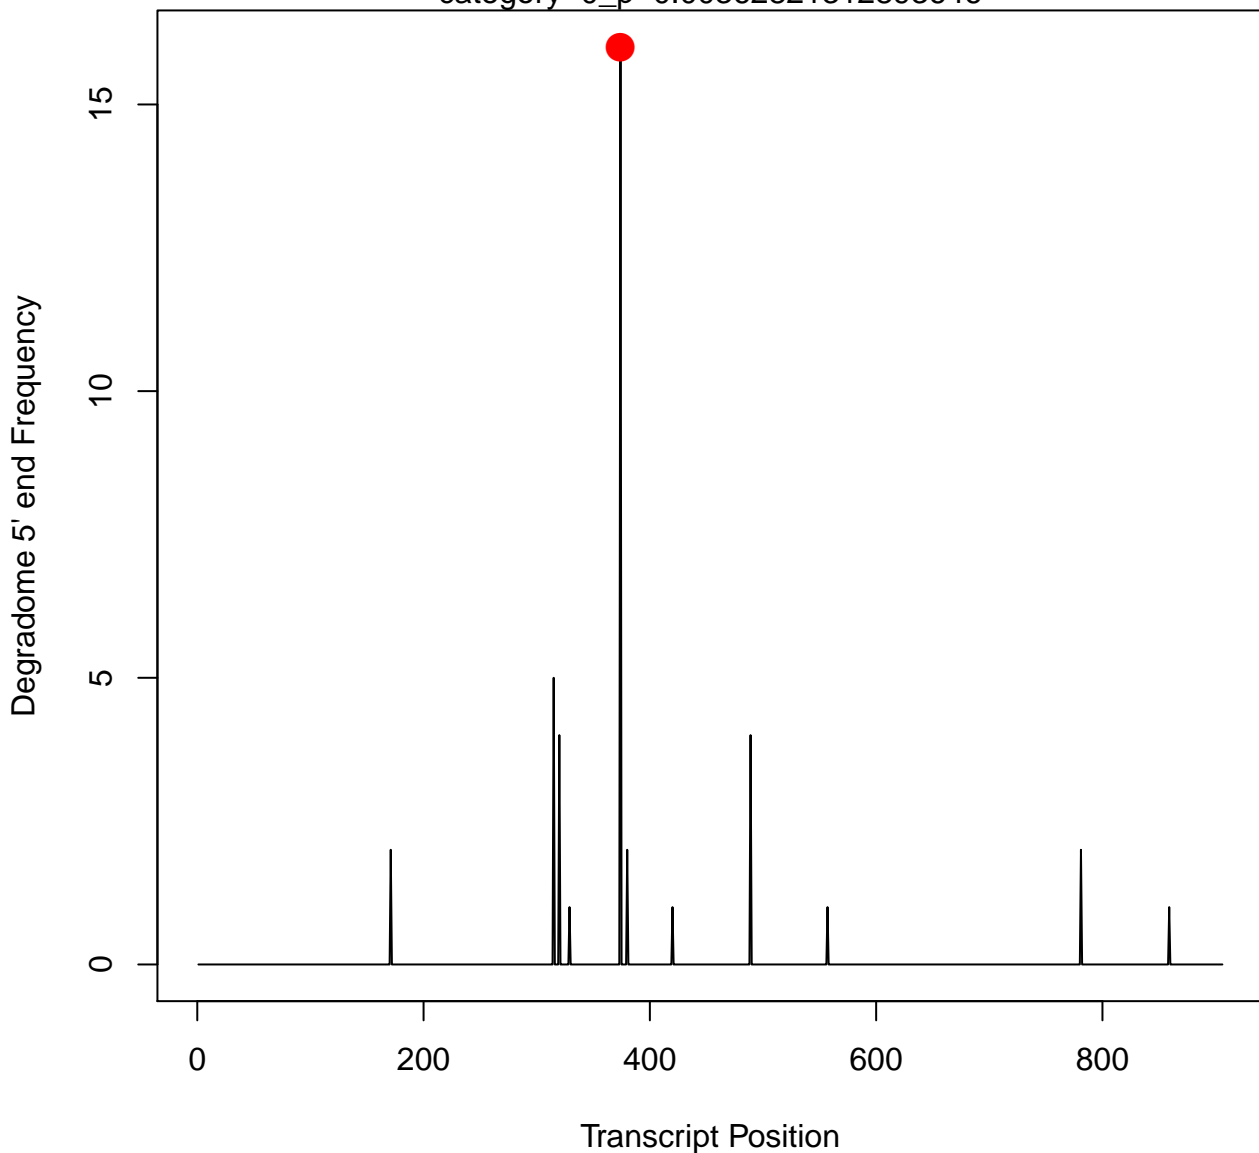

Supplement: Data_Sheet_1.zip [file Data_Sheet_1.zip]

**T=evm.model.LG02.6265\_Q=miR396b-5p\_S=644**

category=0\_p=0.00672763087043382

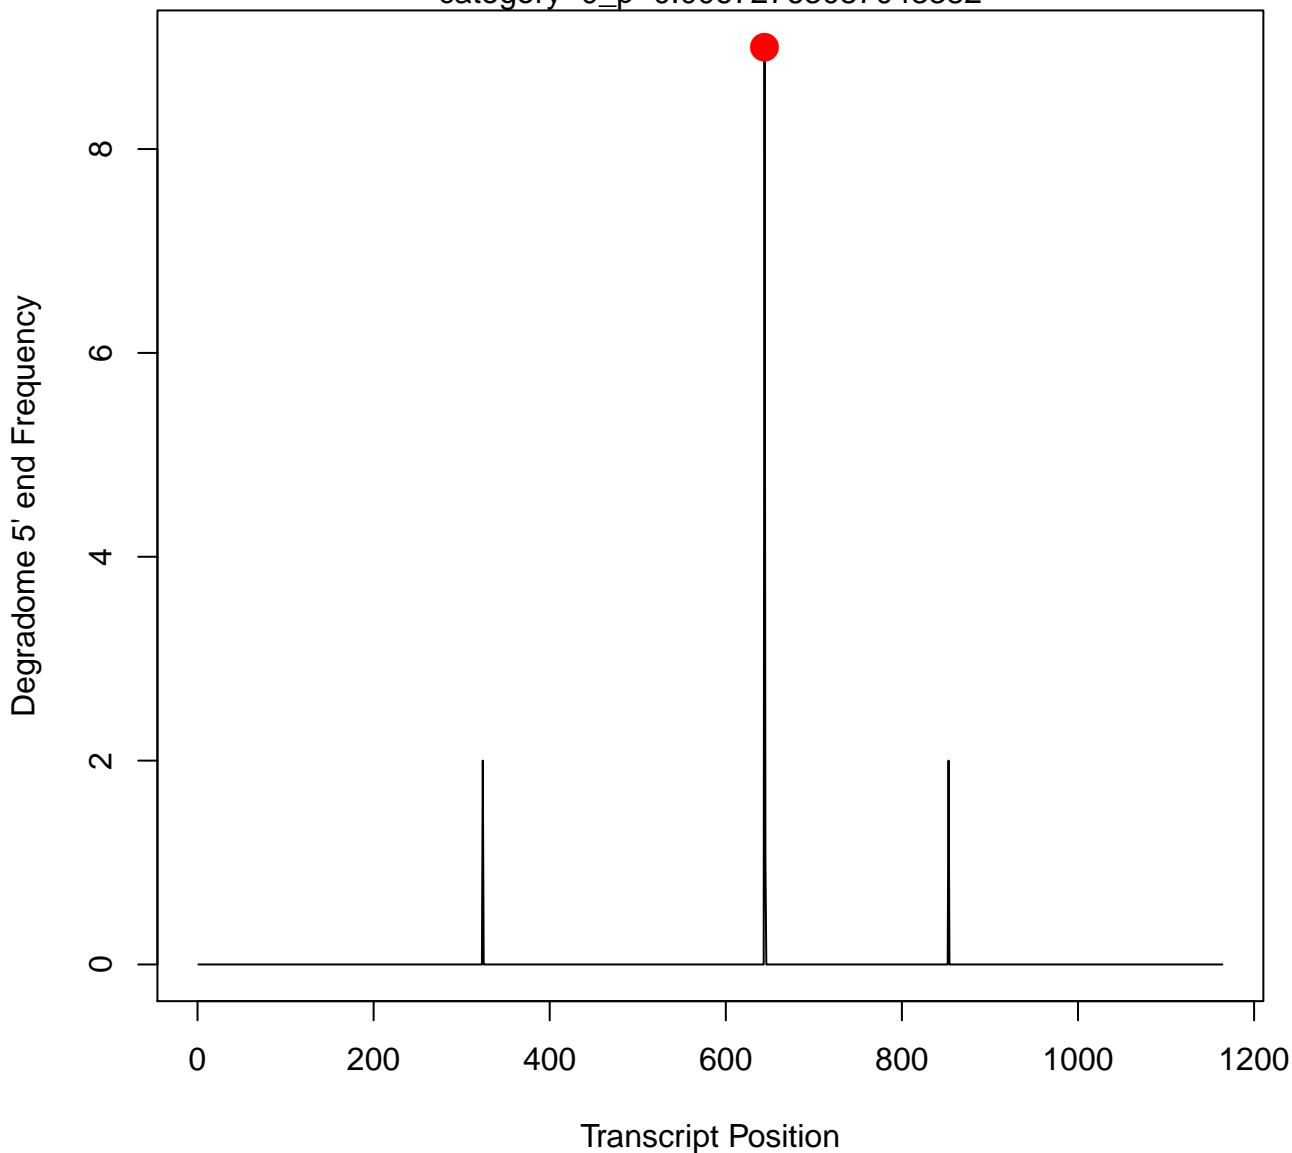

Supplement: Data_Sheet_1.zip [file Data_Sheet_1.zip]

**T=evm.model.LG07.1189\_Q=miRN22-3p\_S=318**

category=2\_p=0.0174234189334928

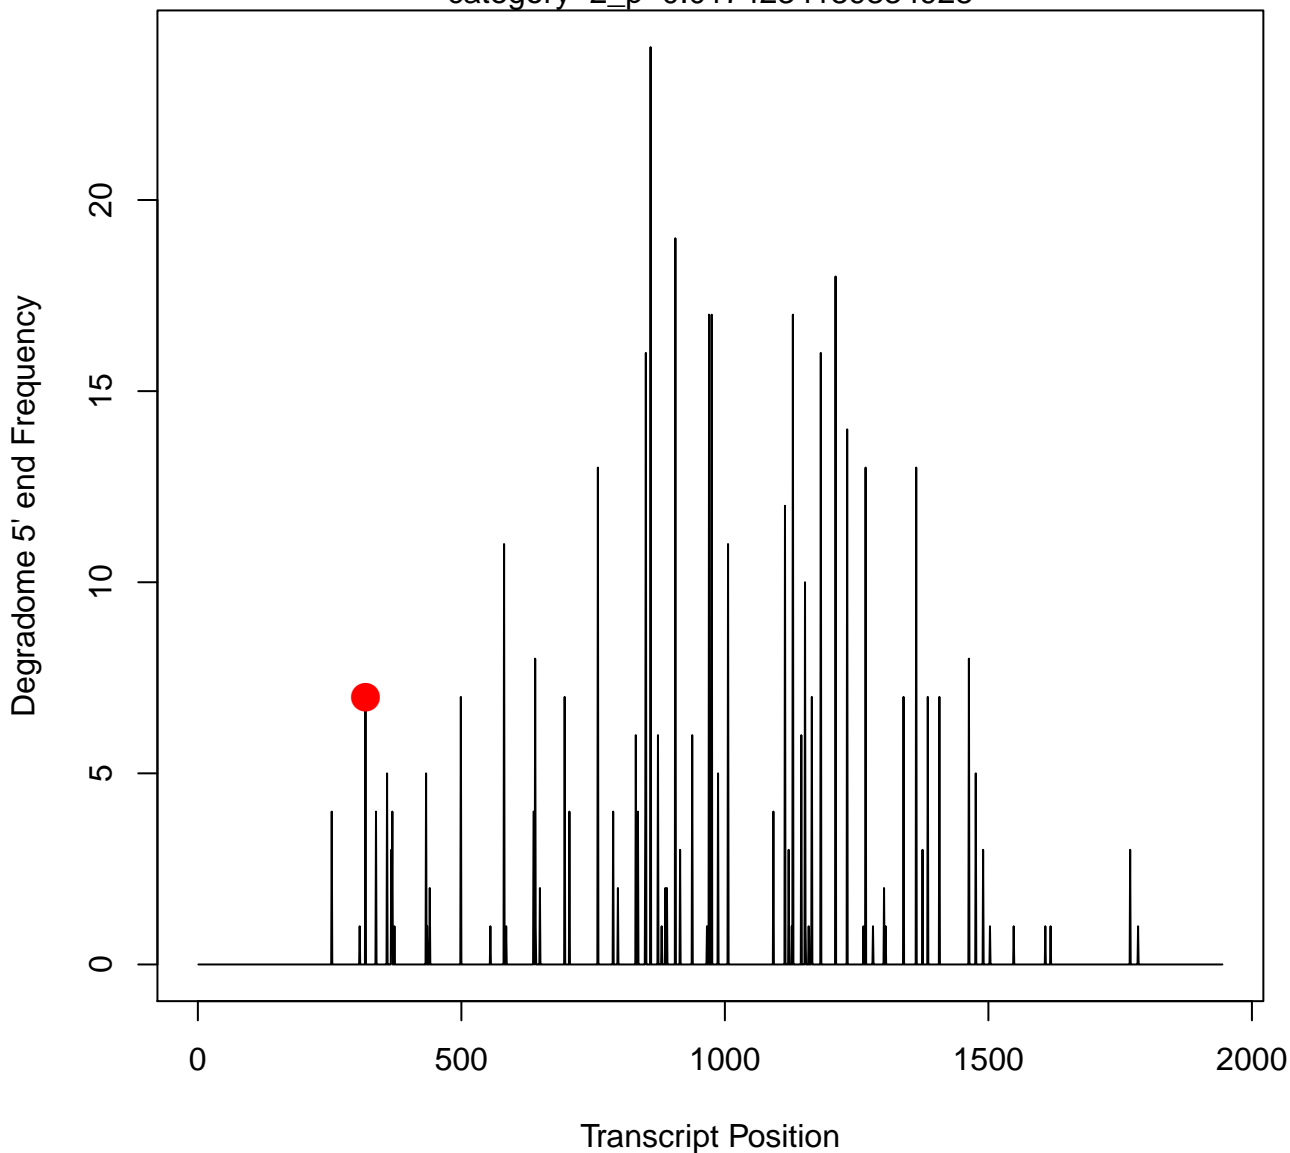

Supplement: Data_Sheet_1.zip [file Data_Sheet_1.zip]

**T=evm.model.LG06.3980\_Q=miR167e-5p\_S=2468**

category=3\_p=0.0241449679652586

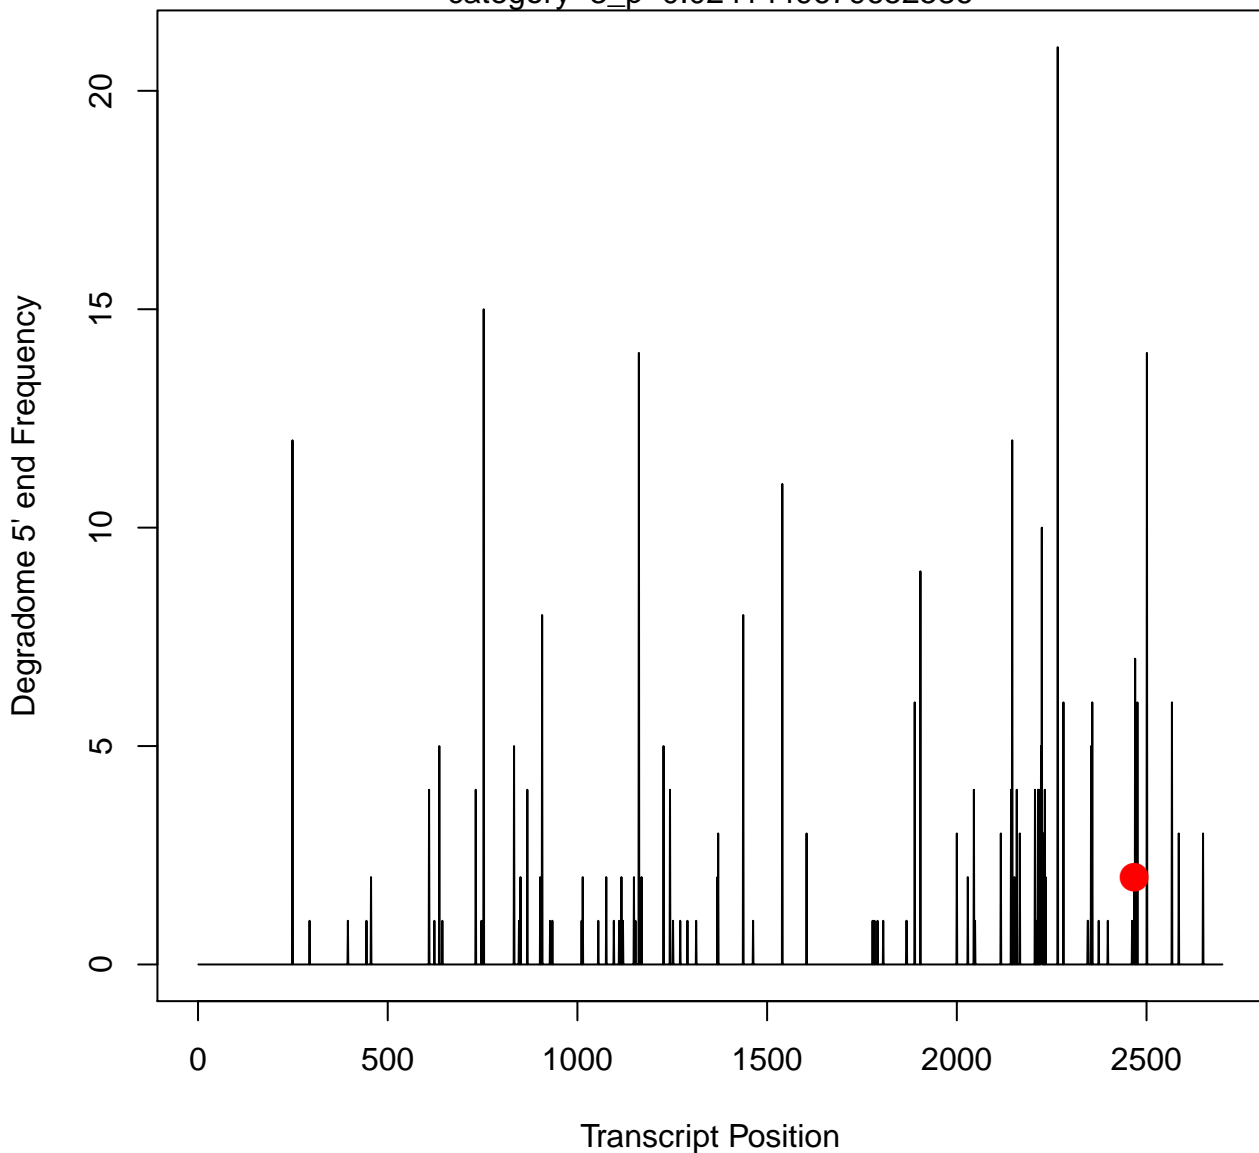

Supplement: Data_Sheet_1.zip [file Data_Sheet_1.zip]

**T=evm.model.LG01.8136\_Q=miR168b-5p\_S=811**

category=2\_p=0.00874999063480097

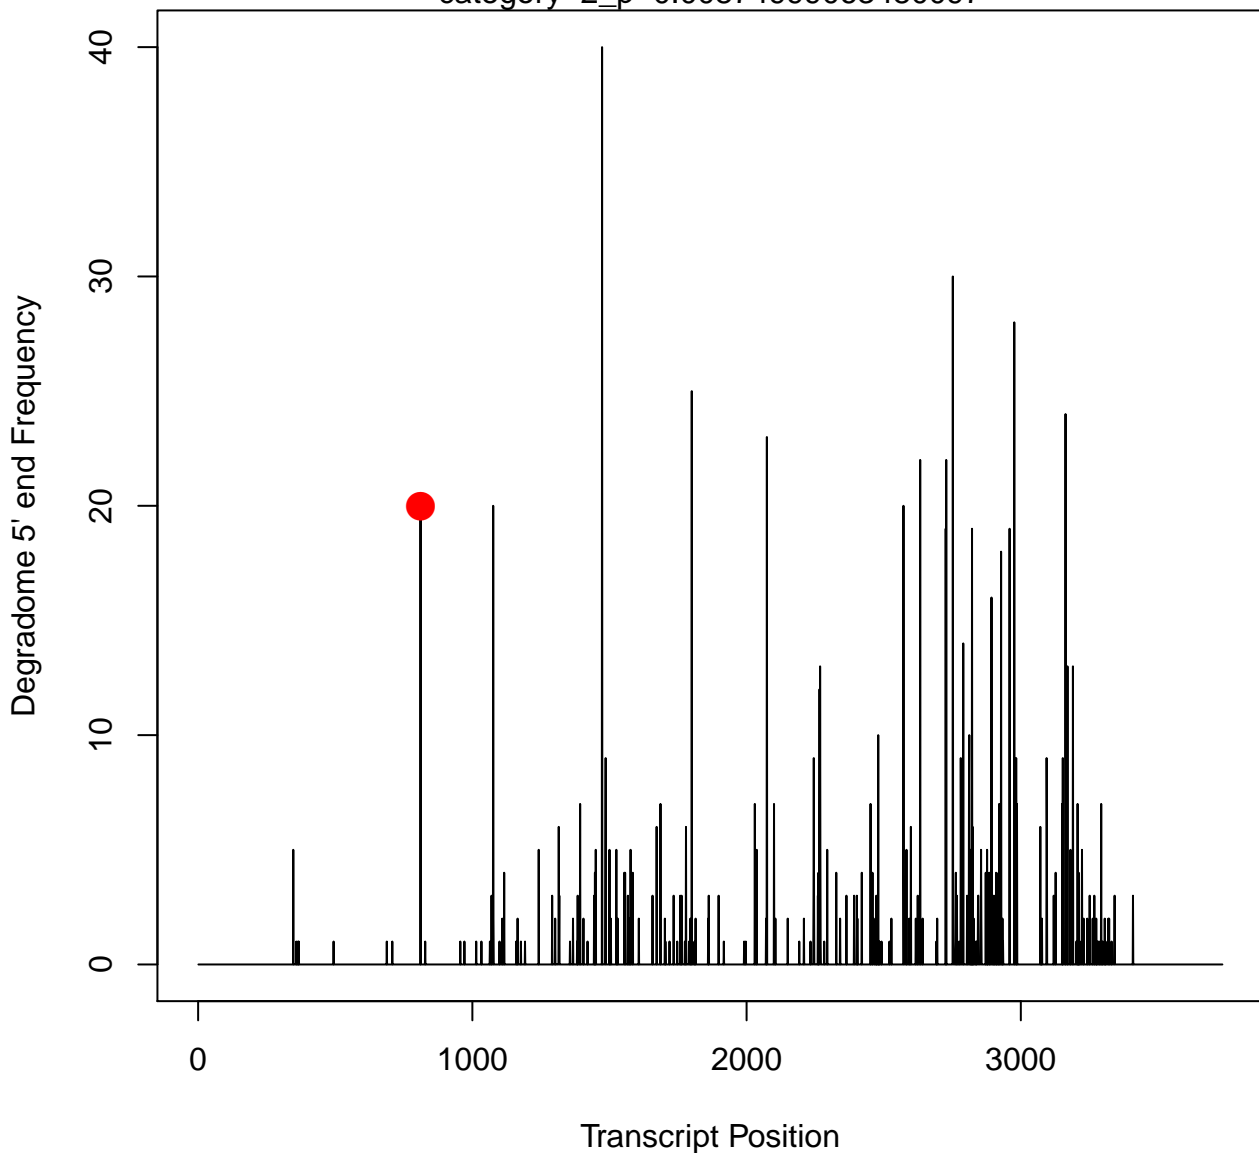

Supplement: Data_Sheet_1.zip [file Data_Sheet_1.zip]

**T=evm.model.LG01.3352\_Q=miRN19b-3p\_S=728**

category=4\_p=0.0423765939260693

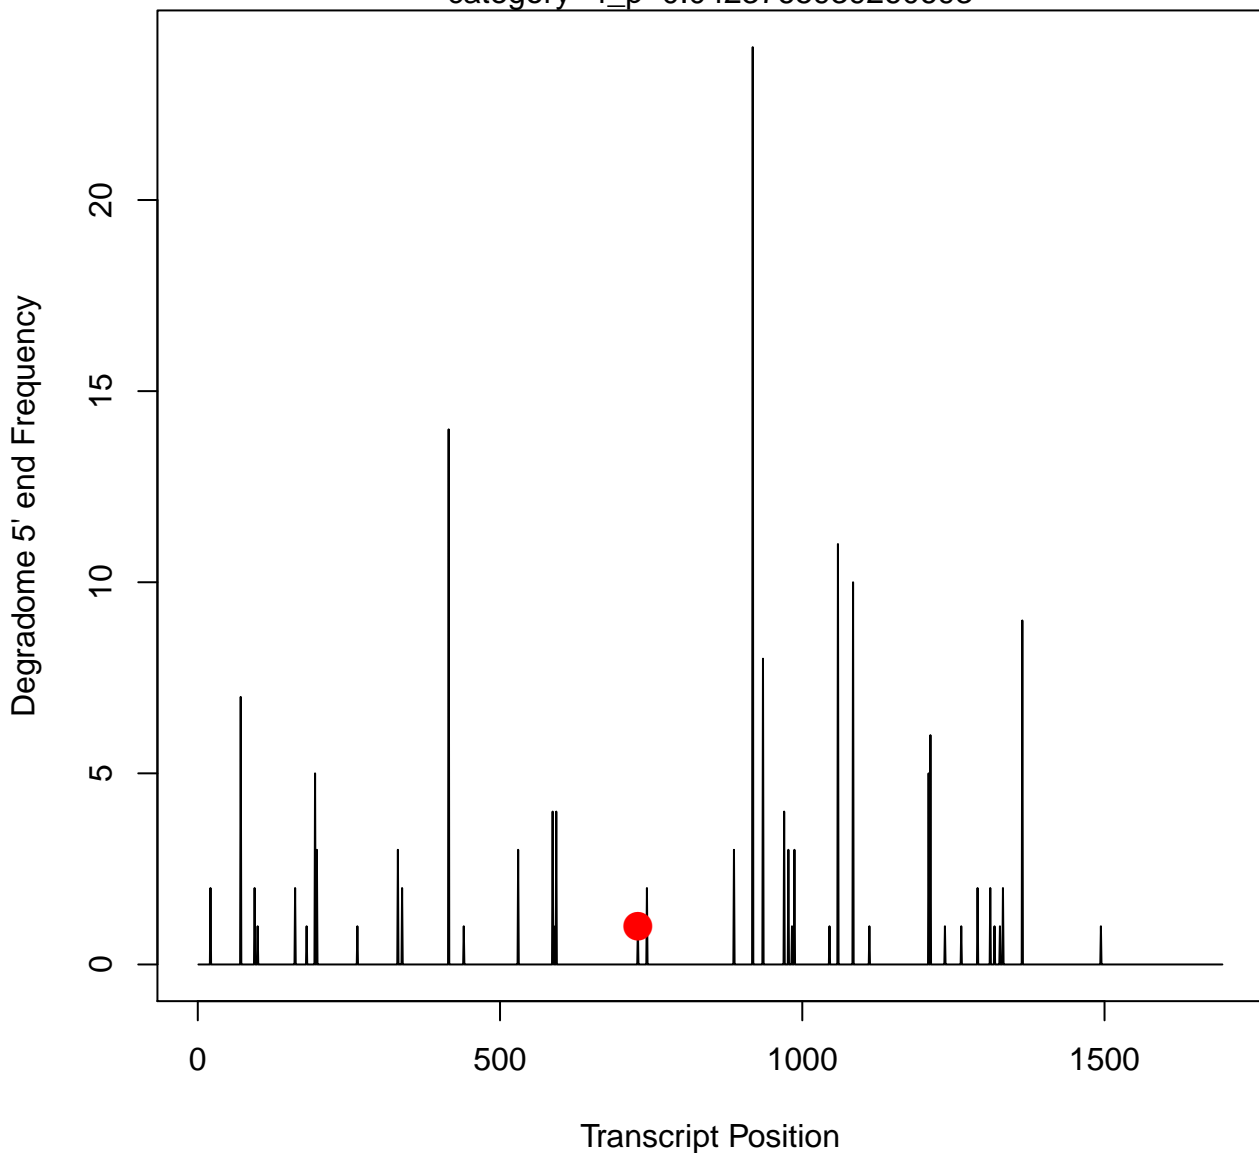

Supplement: Data_Sheet_1.zip [file Data_Sheet_1.zip]

**T=evm.model.LG01.574\_Q=miR395c-5p\_S=225**

category=2\_p=0.0174234189334928

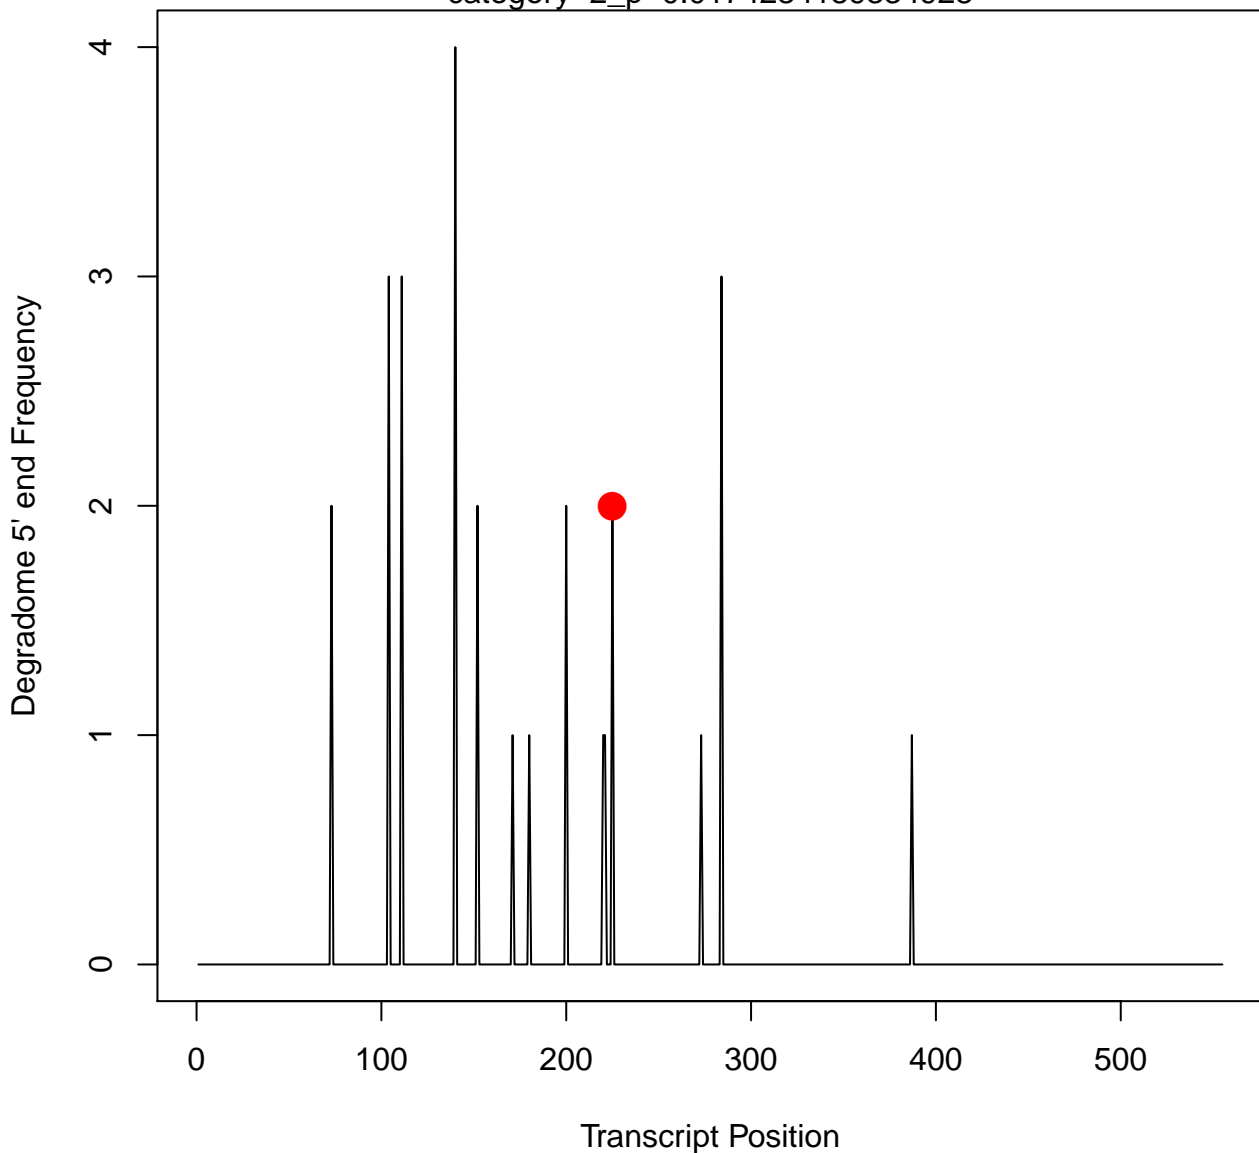

Supplement: Data_Sheet_1.zip [file Data_Sheet_1.zip]

**T=evm.model.LG04.1183\_Q=miR393b-5p\_S=1519**

category=0\_p=0.00207487934604456

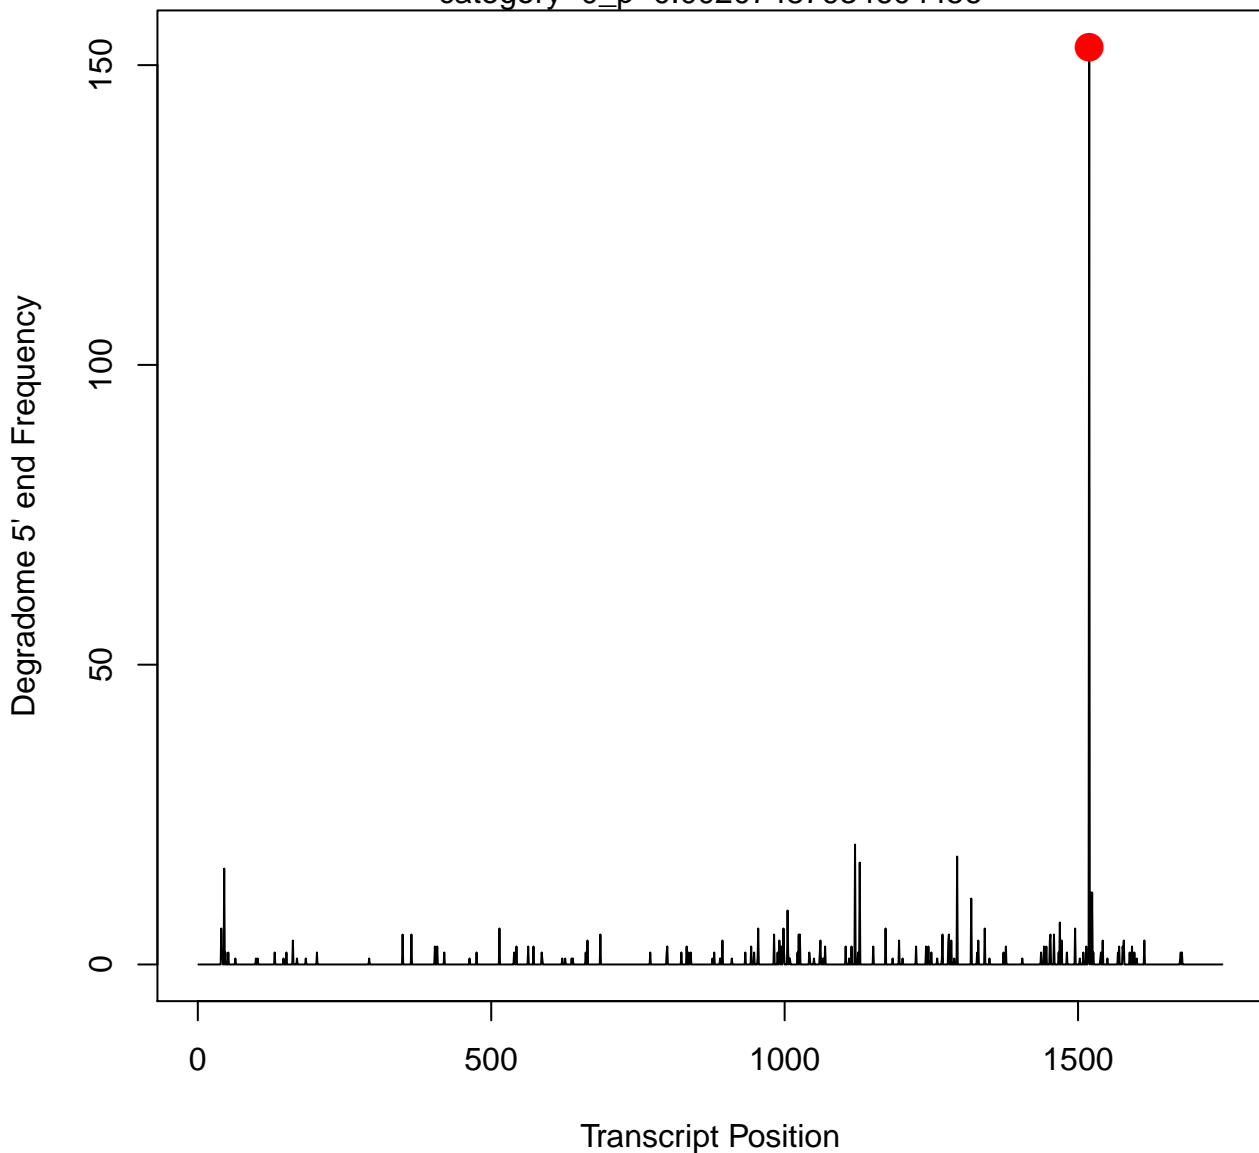

Supplement: Data_Sheet_1.zip [file Data_Sheet_1.zip]

**T=evm.model.LG01.4654\_Q=miR393a-5p\_S=1516**

category=0\_p=0.00103797837257324

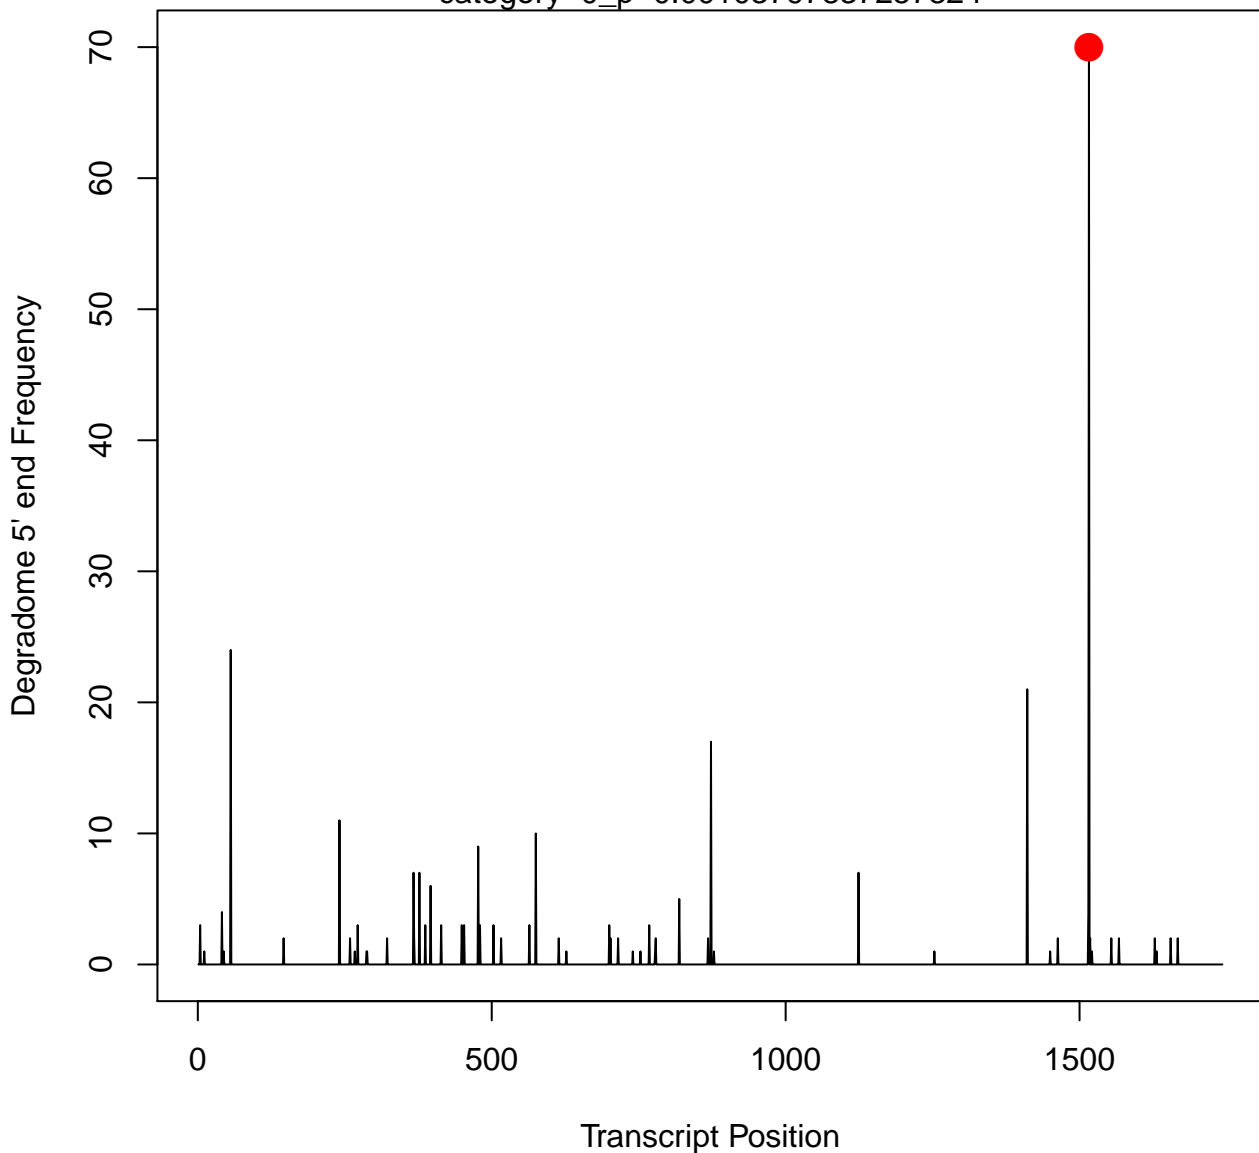

Supplement: Data_Sheet_1.zip [file Data_Sheet_1.zip]

**T=evm.model.LG02.2189\_Q=miR166e-3p\_S=562**

category=0\_p=0.00155656346427469

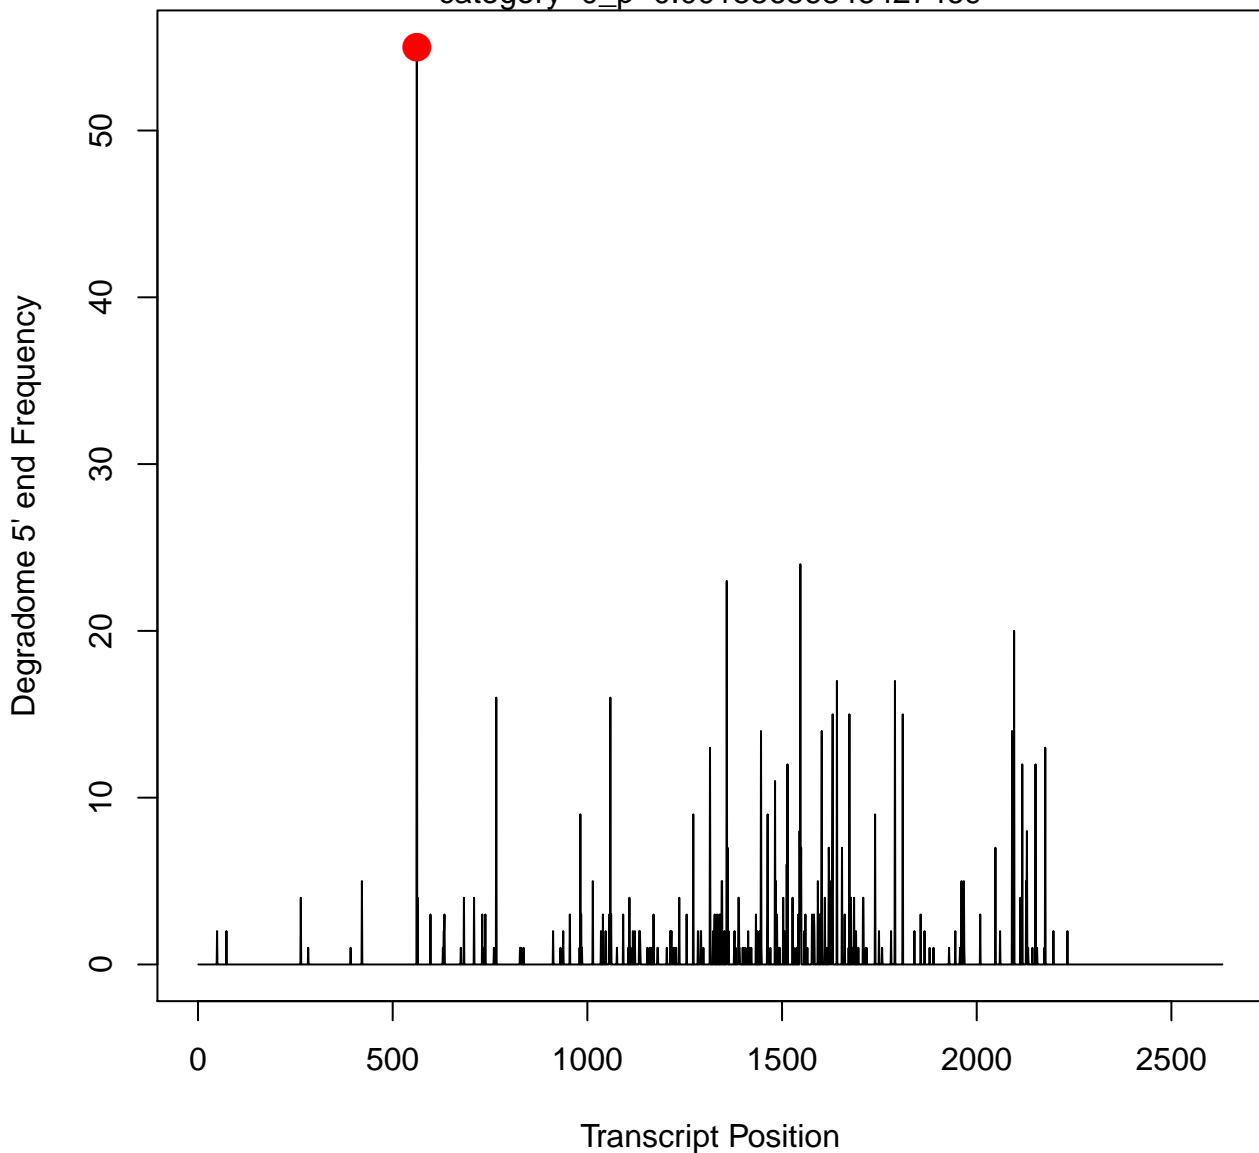

Supplement: Data_Sheet_1.zip [file Data_Sheet_1.zip]

**T=evm.model.LG01.6624\_Q=miRN3-5p\_S=83**

category=2\_p=0.0345432623396535

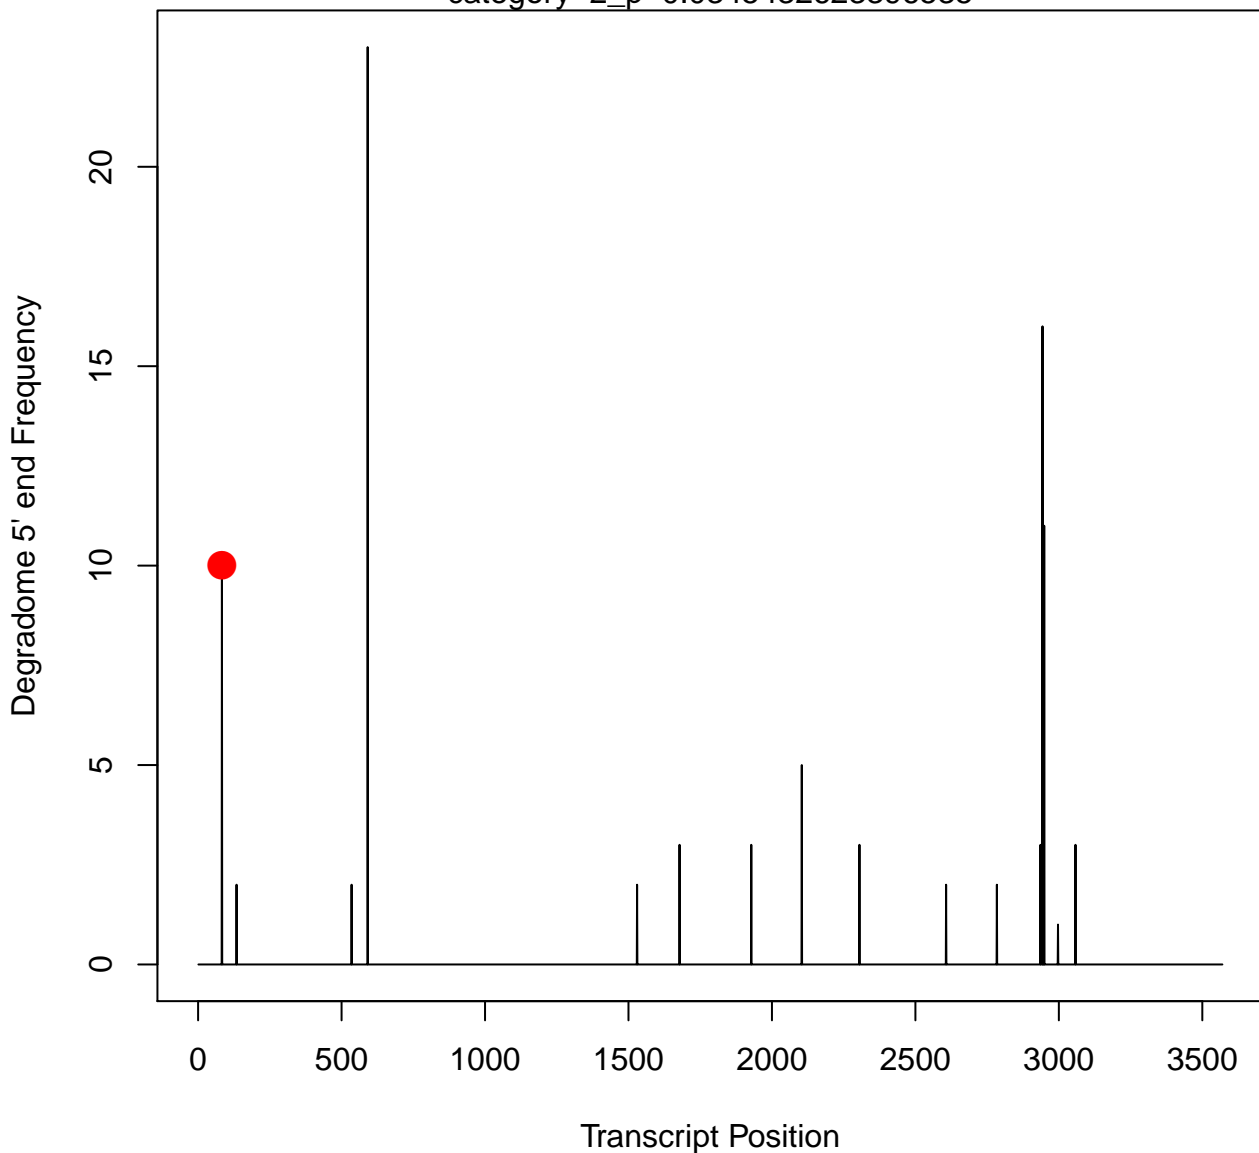

Supplement: Data_Sheet_1.zip [file Data_Sheet_1.zip]

**T=evm.model.LG02.4722\_Q=miRN8-5p\_S=316**

category=2\_p=0.0260209548157995

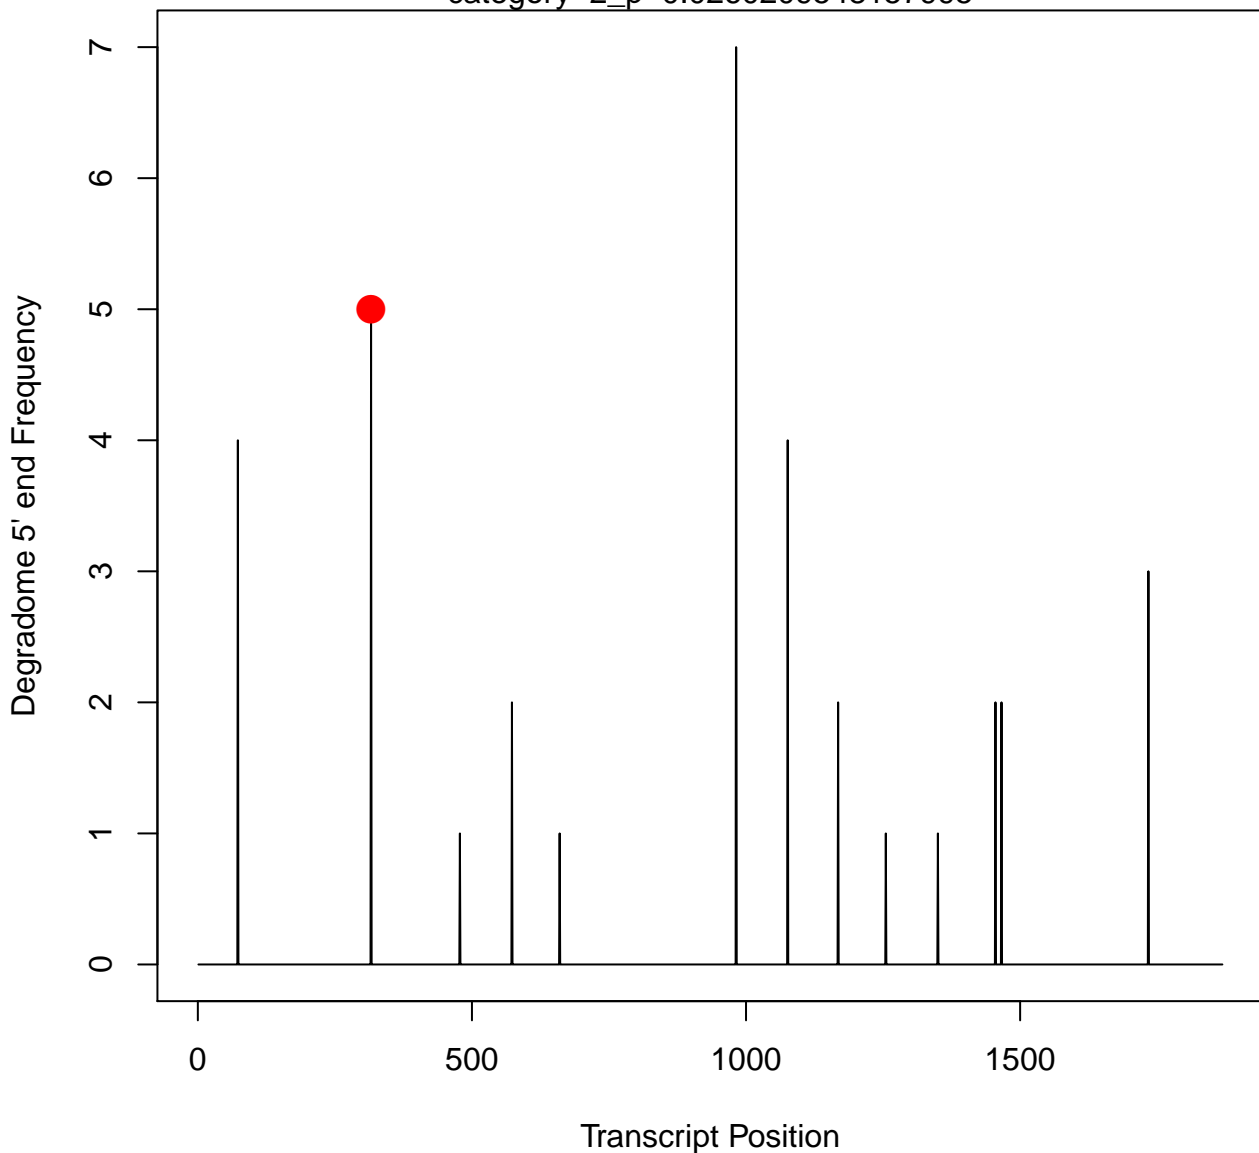

Supplement: Data_Sheet_1.zip [file Data_Sheet_1.zip]

**T=evm.model.LG02.2189\_Q=miR166i-3p\_S=564**

category=2\_p=0.0174234189334928

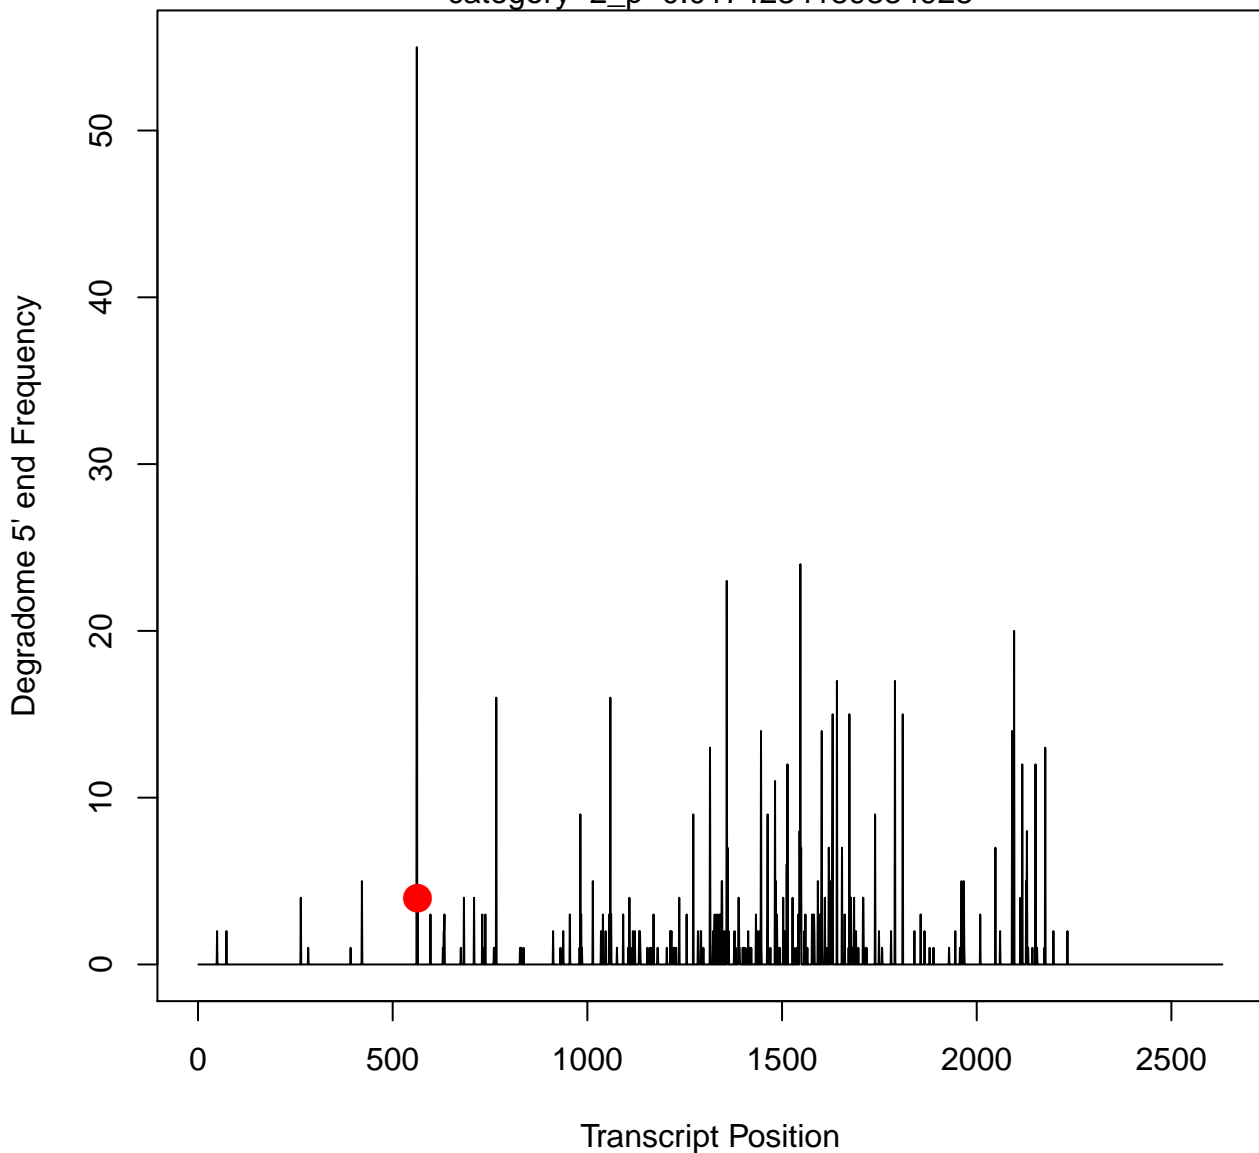

Supplement: Data_Sheet_1.zip [file Data_Sheet_1.zip]

**T=evm.model.LG08.2016\_Q=miRN18-5p\_S=709**

category=3\_p=0.0241449679652586

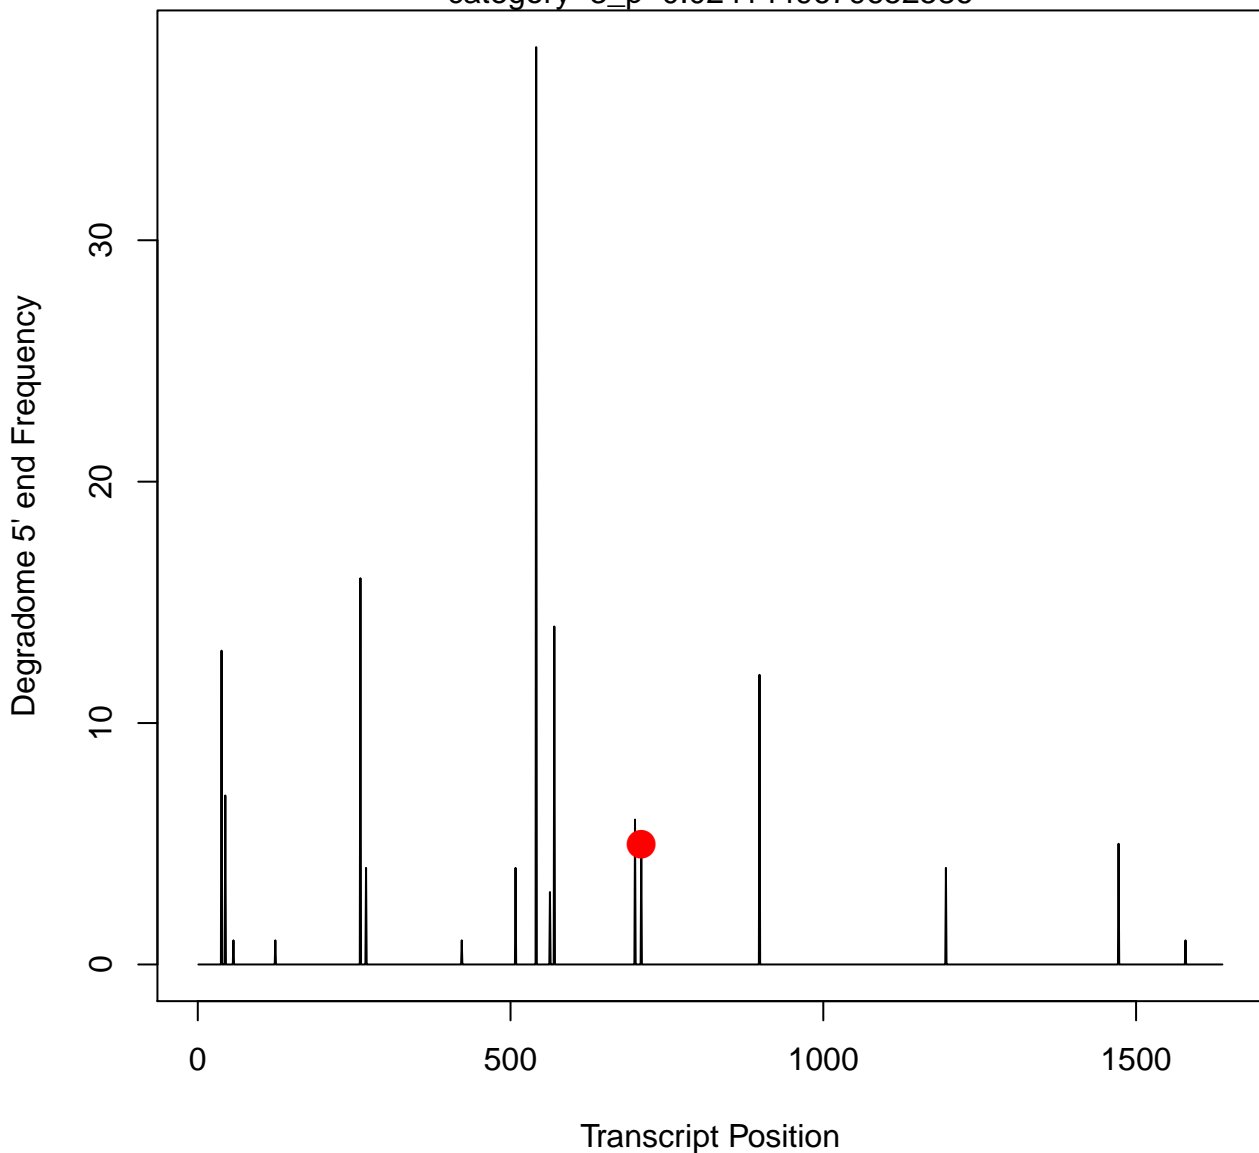

Supplement: Data_Sheet_1.zip [file Data_Sheet_1.zip]

**T=evm.model.LG06.290\_Q=miR156c-5p\_S=933**

category=3\_p=0.0241449679652586

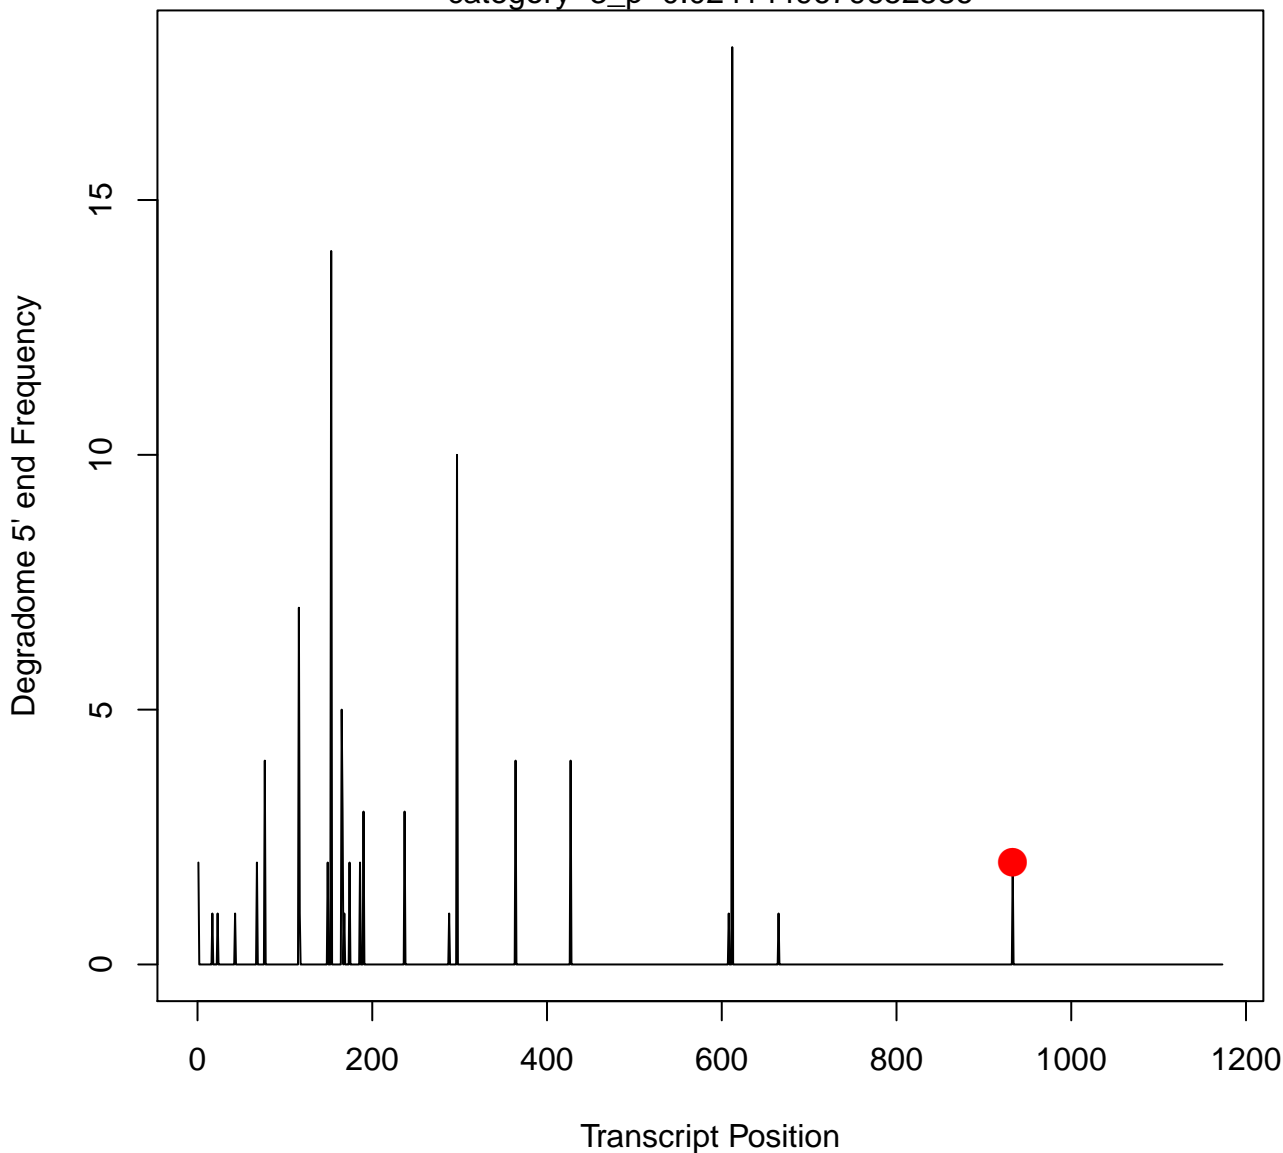

Supplement: Data_Sheet_1.zip [file Data_Sheet_1.zip]

**T=evm.model.LG06.4588\_Q=miR171c-3p\_S=995**

category=2\_p=0.0345432623396535

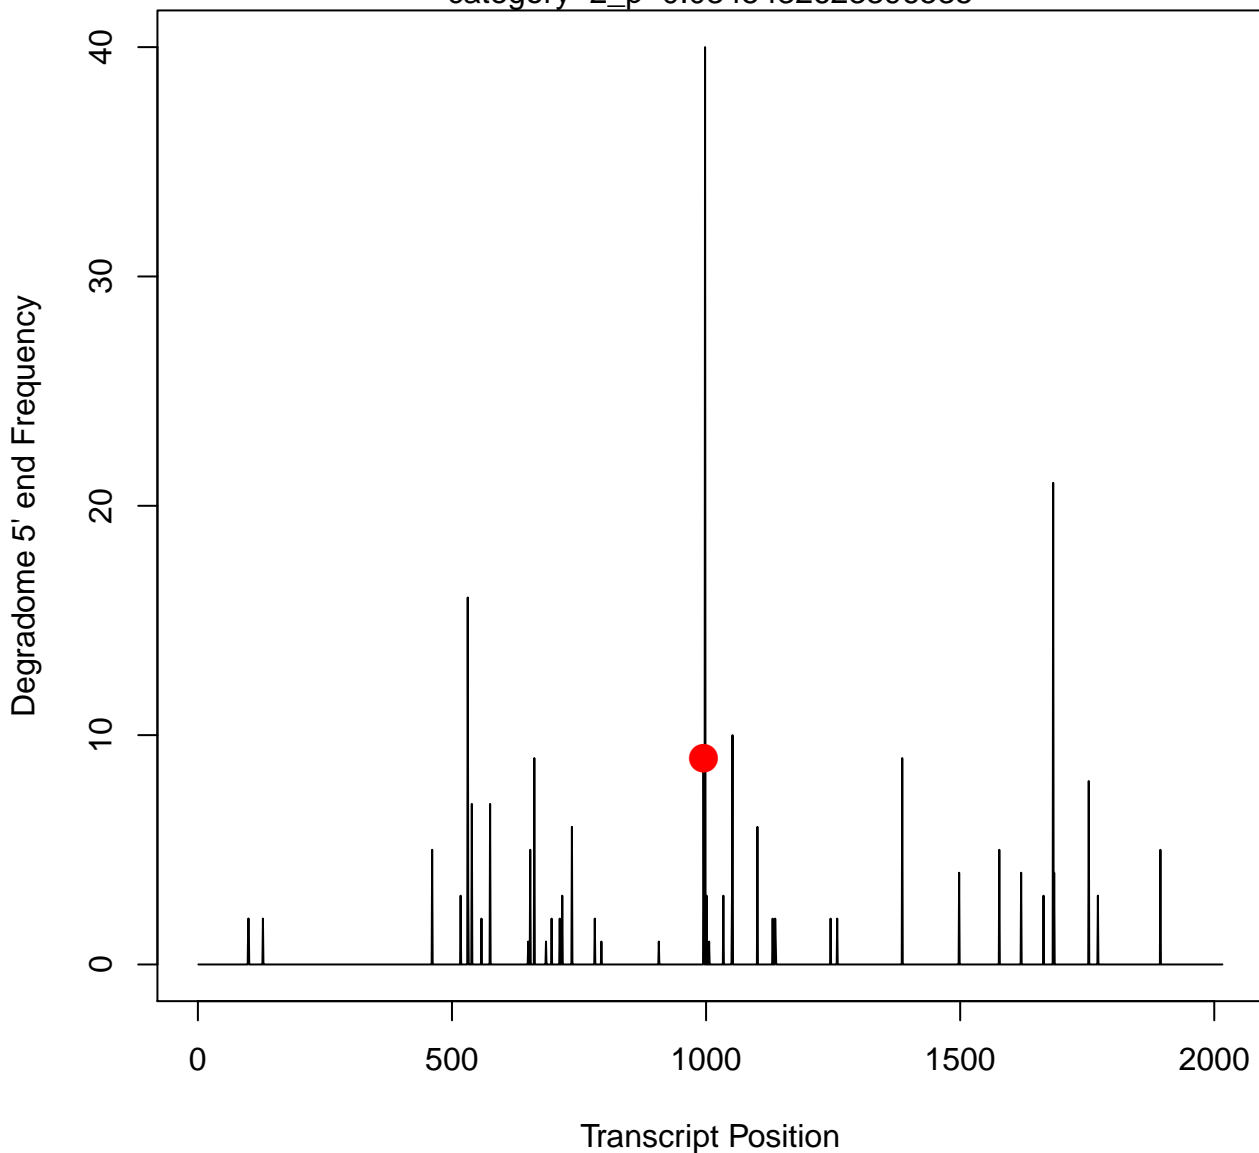

Supplement: Data_Sheet_1.zip [file Data_Sheet_1.zip]

**T=evm.model.LG03.637\_Q=miR396a-5p\_S=728**

category=0\_p=0.00466242549475071

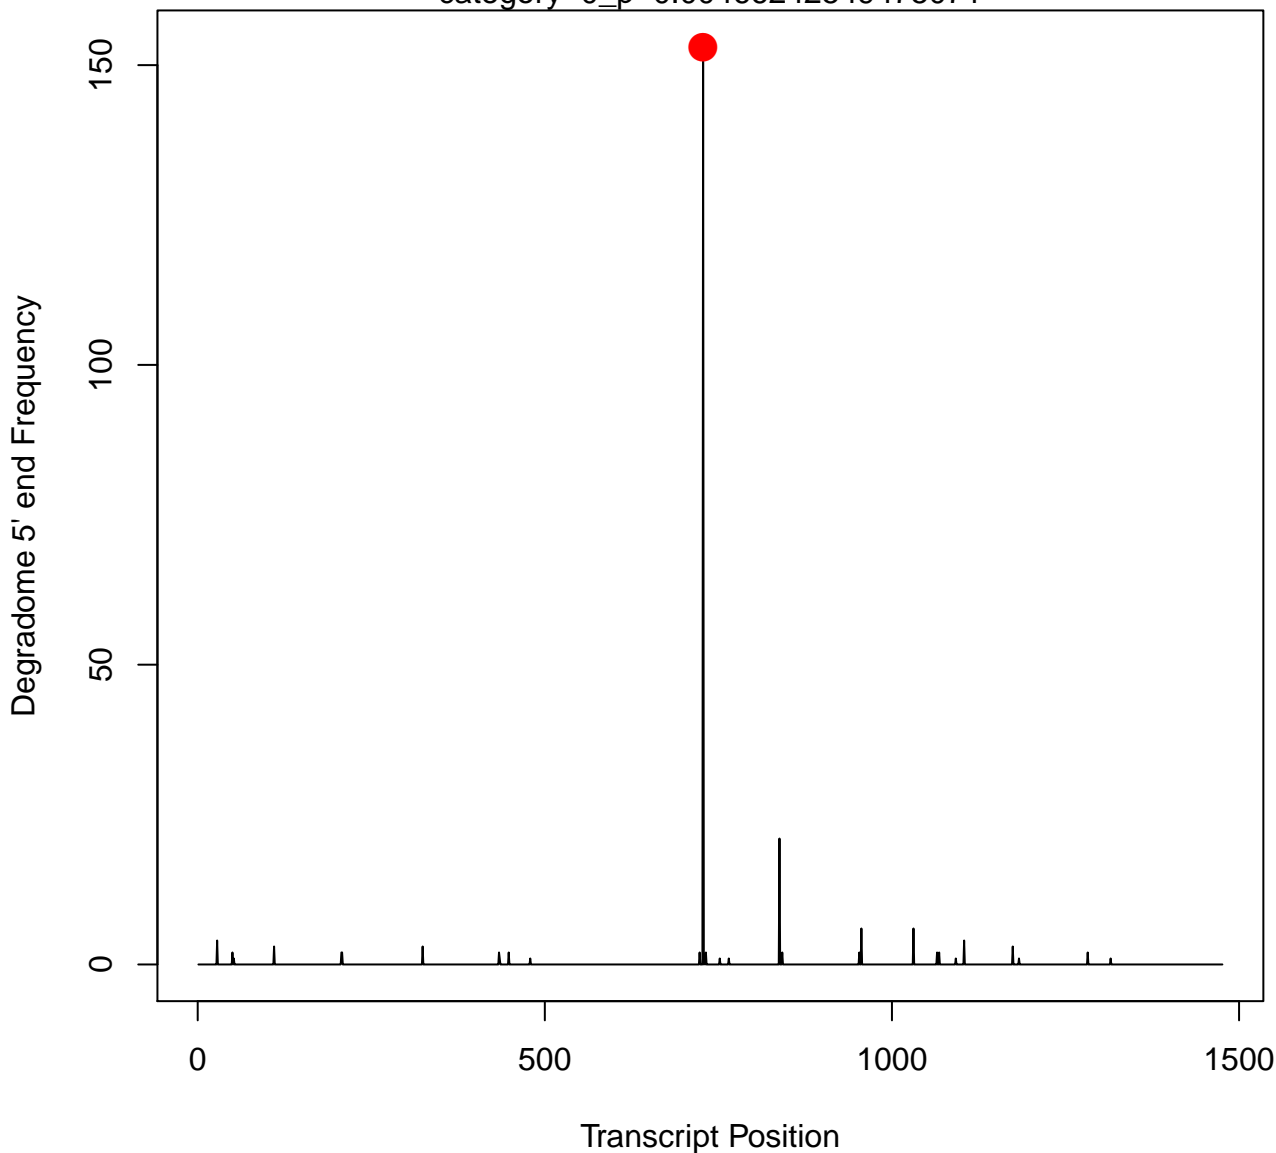

Supplement: Data_Sheet_1.zip [file Data_Sheet_1.zip]

**T=evm.model.LG02.1267\_Q=miR395a-3p\_S=342**

category=2\_p=0.00874999063480097

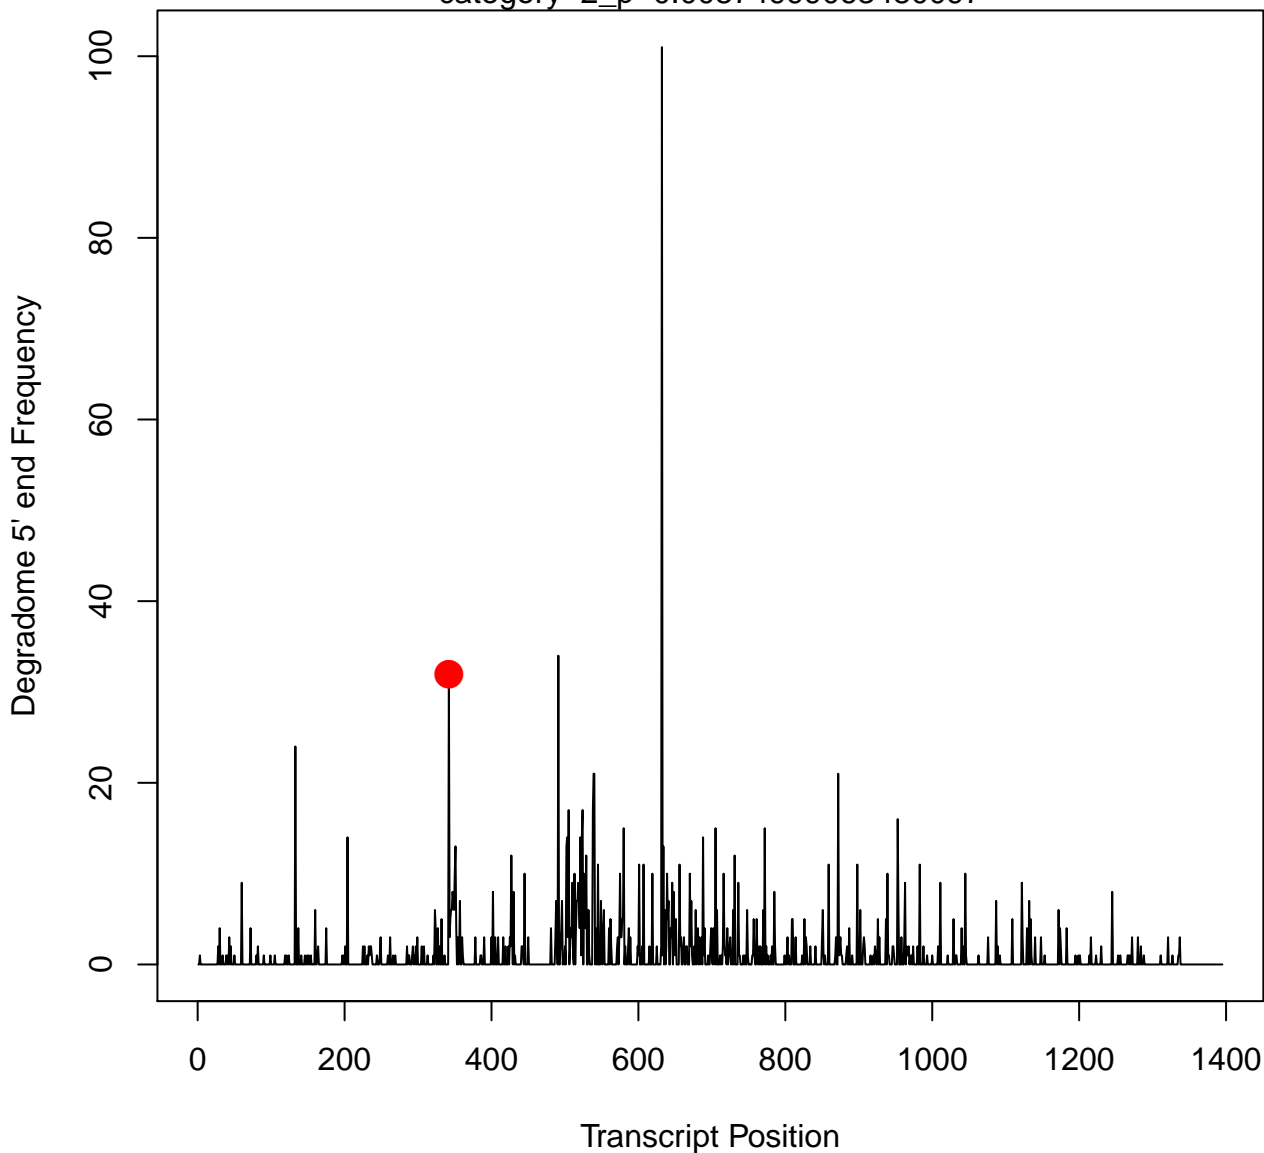

Supplement: Data_Sheet_1.zip [file Data_Sheet_1.zip]

**T=evm.model.LG03.637\_Q=miR396d-5p\_S=728**

category=0\_p=0.00311070403873104

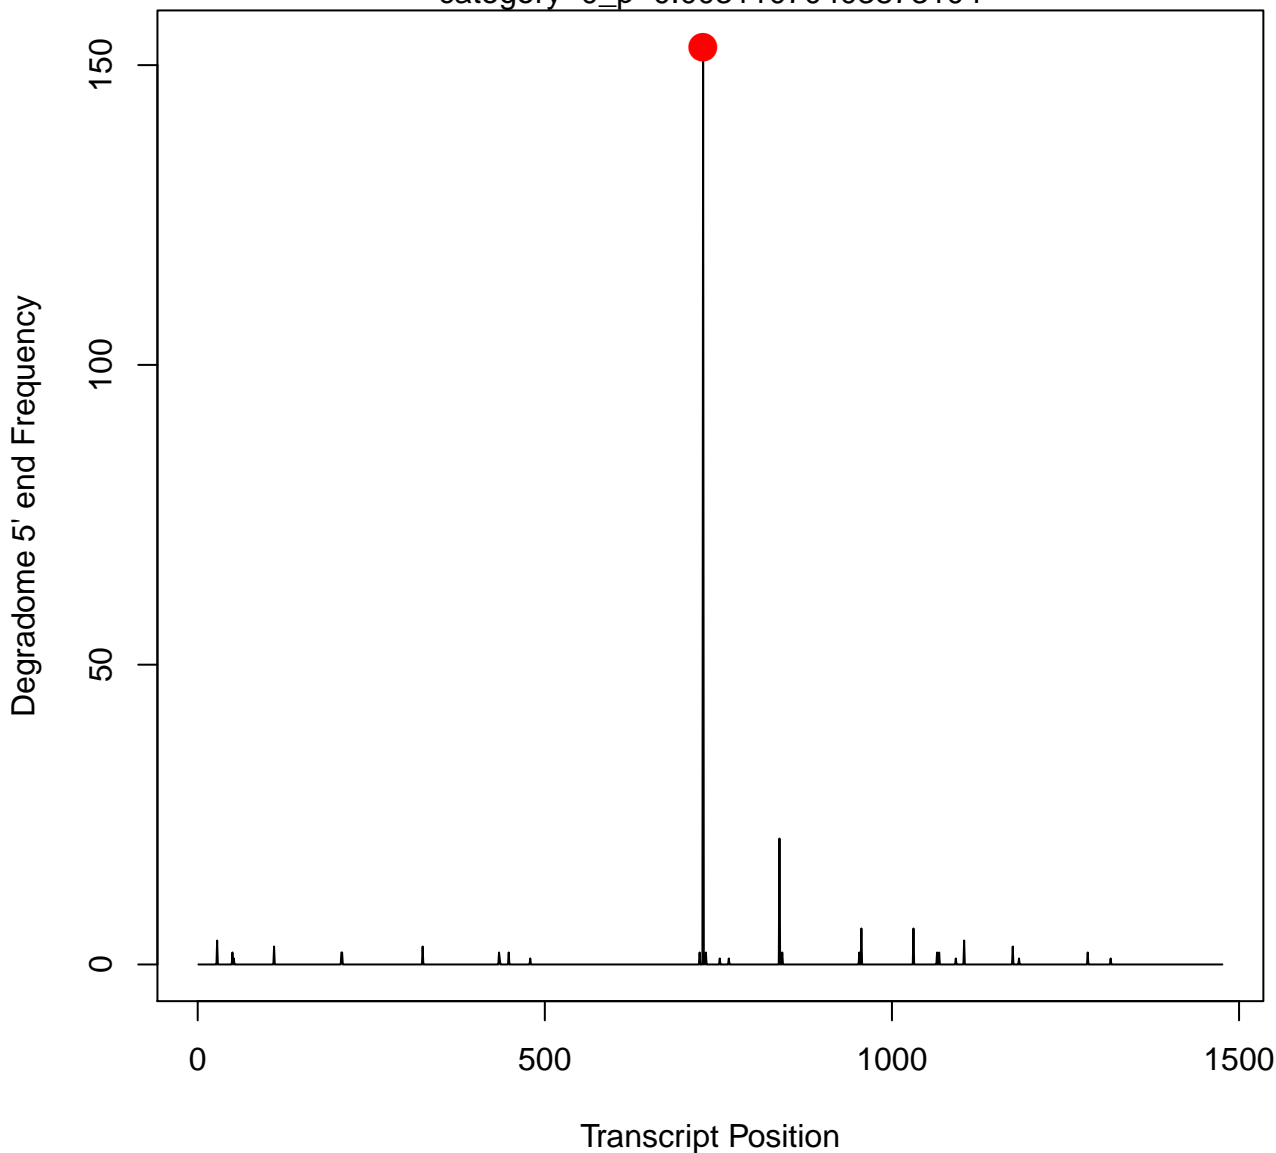

Supplement: Data_Sheet_1.zip [file Data_Sheet_1.zip]
