# Supplementary figures and images for: Identification of miRNAs and their targets in two Taraxacum species with contrasting rubber-producing ability (part 2 of 2)
Source: Frontiers journal article supplement (doi:10.3389/fpls.2023.1287318), 2023-11-08

**T=evm.model.LG05.2085\_Q=miR171d-3p\_S=551**

category=0\_p=0.00051912393111464

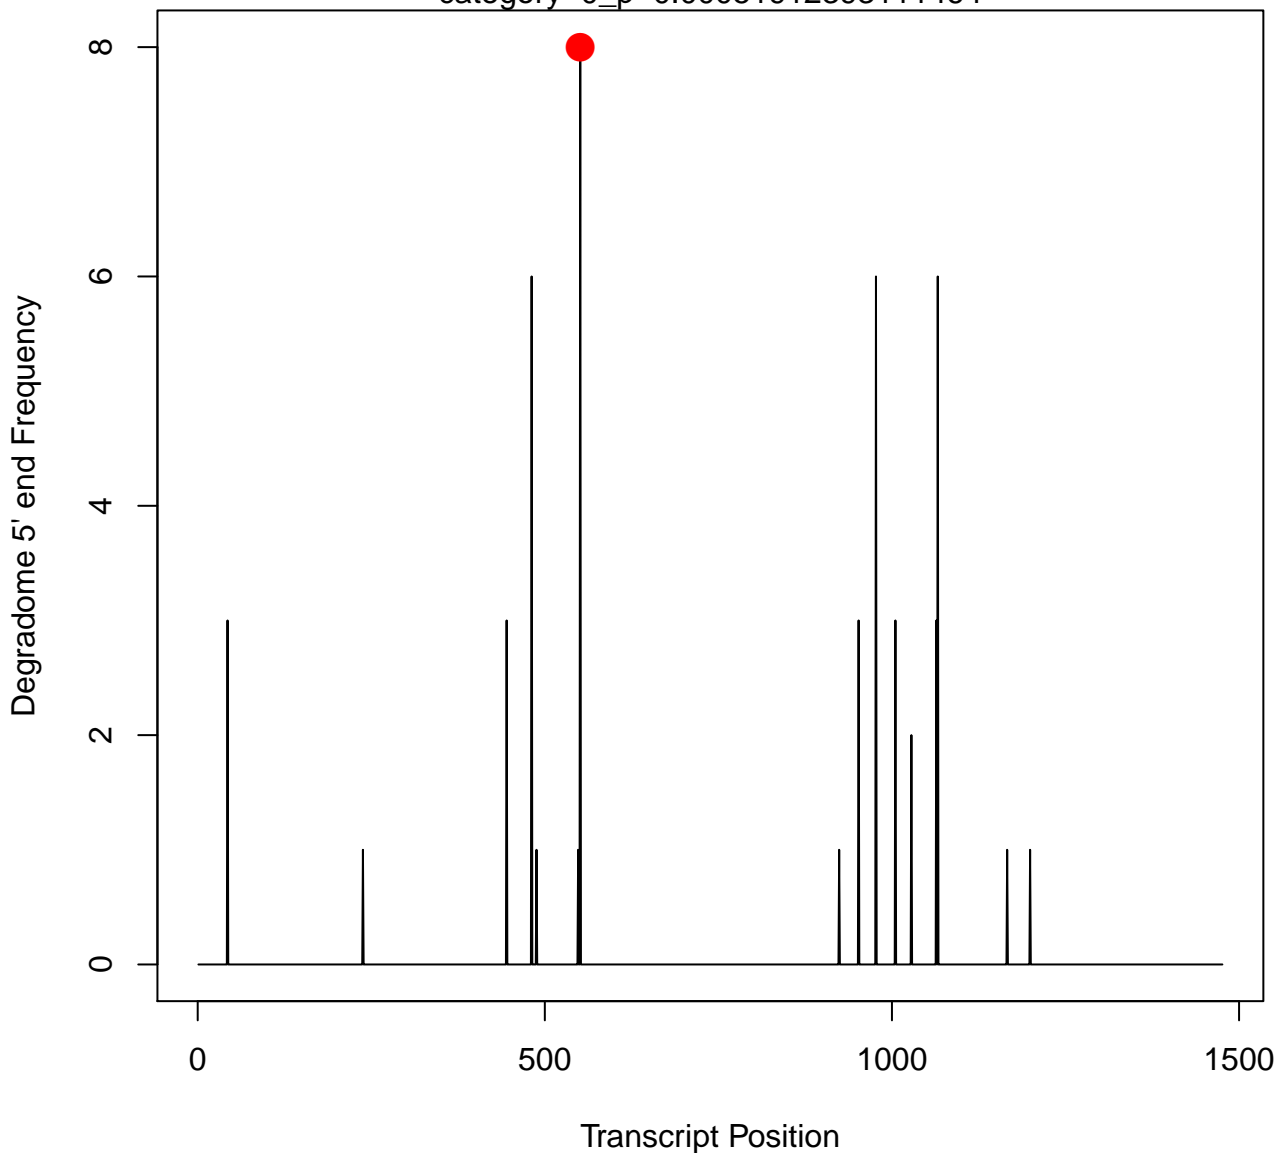

Supplement: Data_Sheet_1.zip [file Data_Sheet_1.zip]

**T=evm.model.LG01.6147\_Q=miR166a-3p\_S=577**

category=0\_p=0.00207487934604456

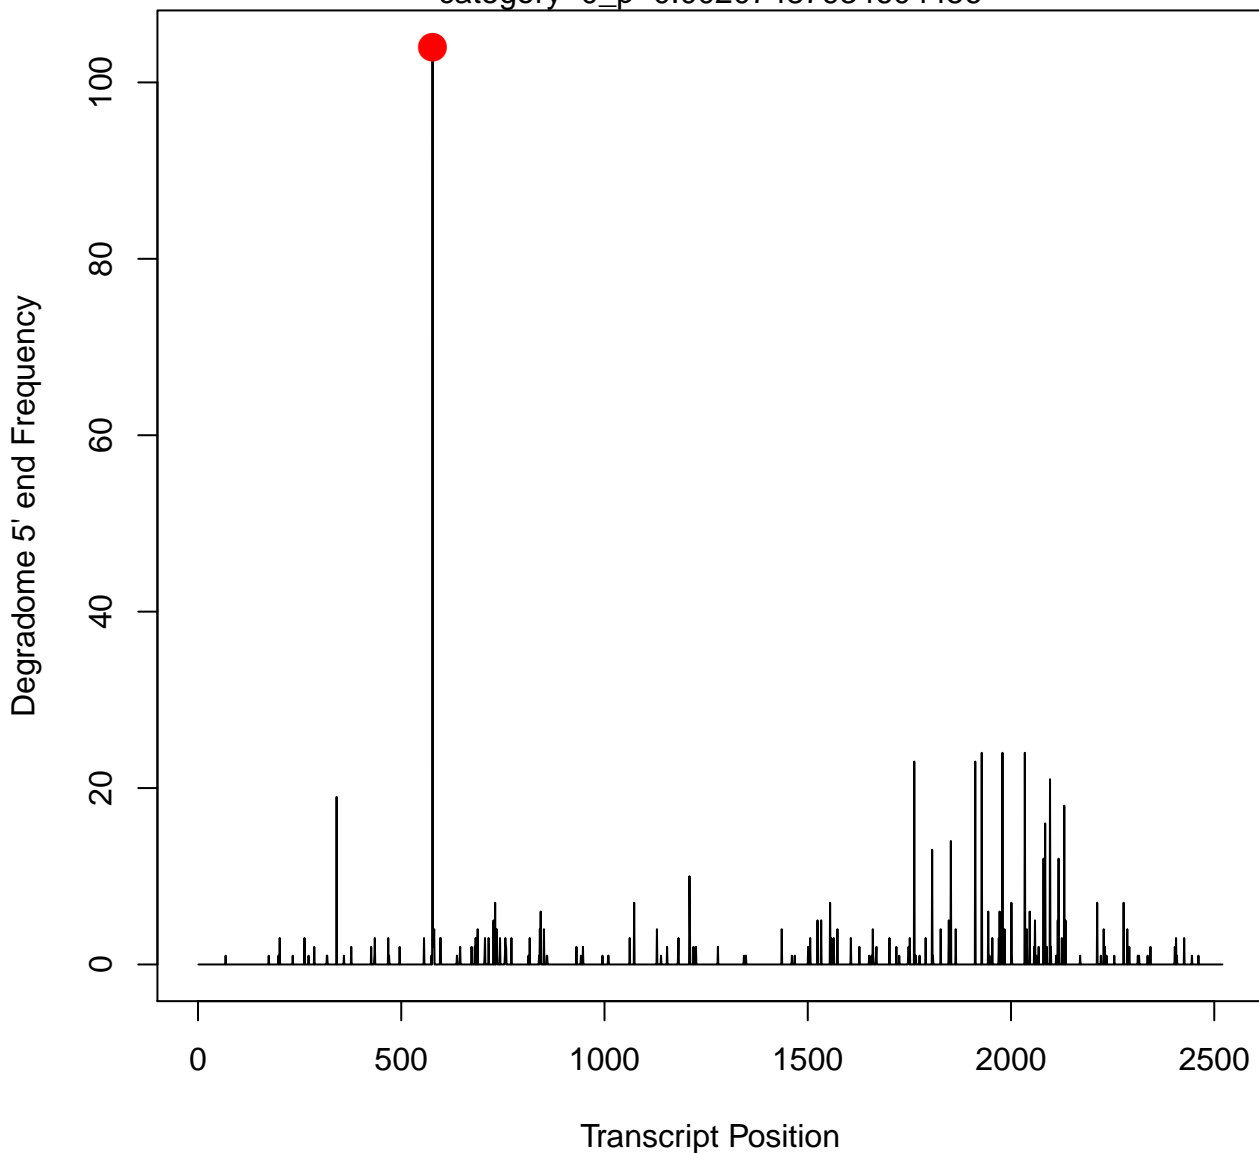

Supplement: Data_Sheet_1.zip [file Data_Sheet_1.zip]

**T=evm.model.LG06.2301\_Q=miRN22-3p\_S=333**

category=4\_p=0.00862274555333054

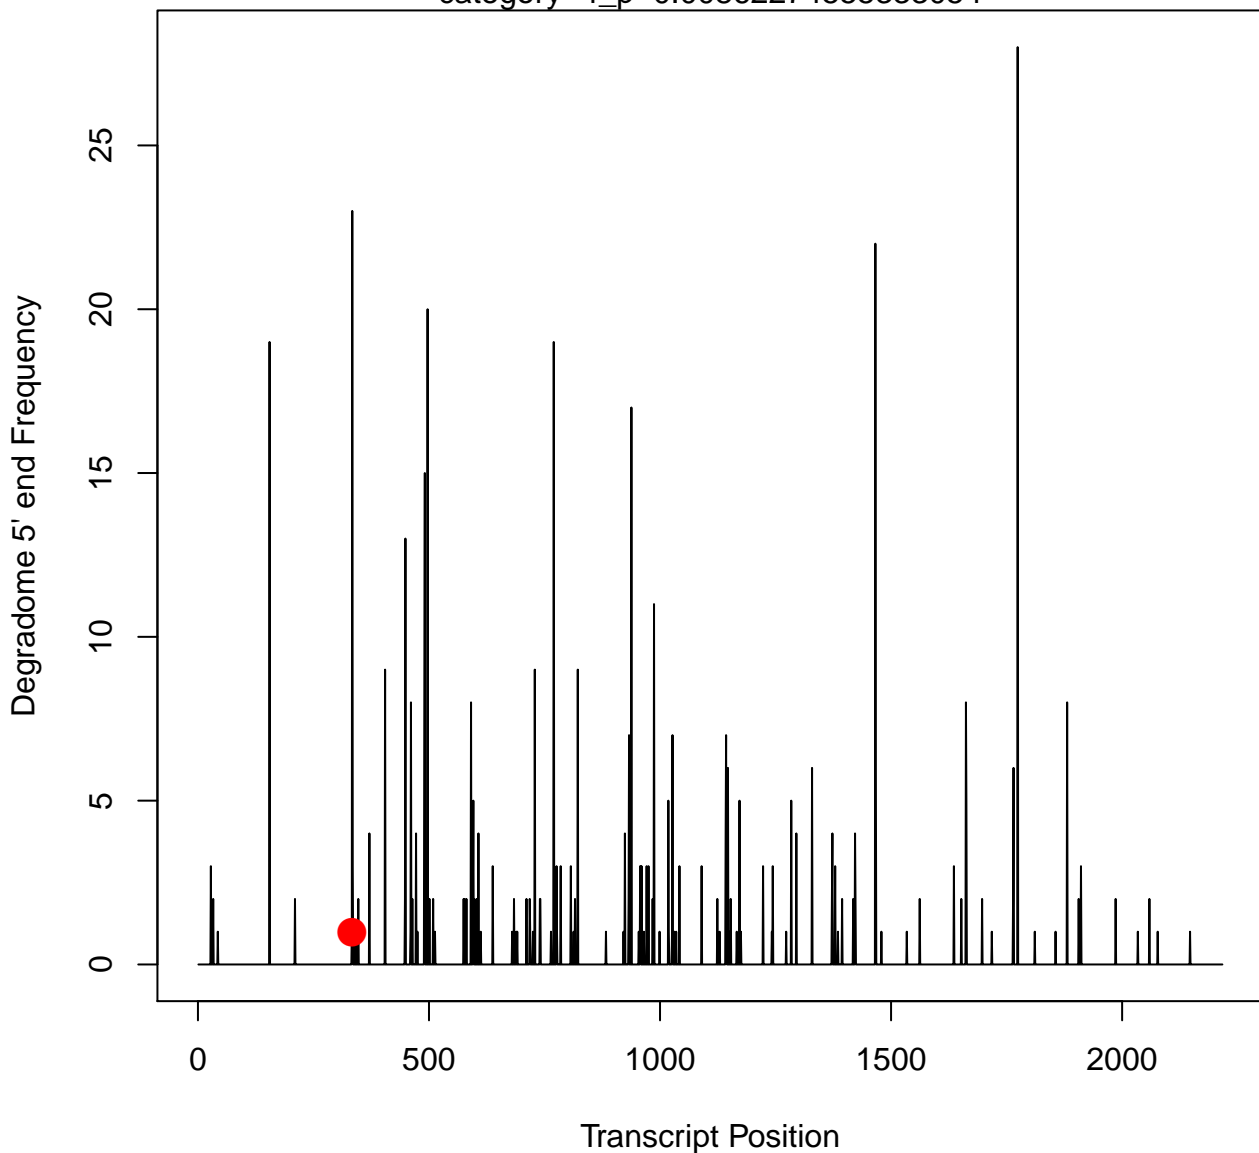

Supplement: Data_Sheet_1.zip [file Data_Sheet_1.zip]

**T=evm.model.LG07.596\_Q=miRN2a-5p\_S=71**

category=0\_p=0.00103797837257324

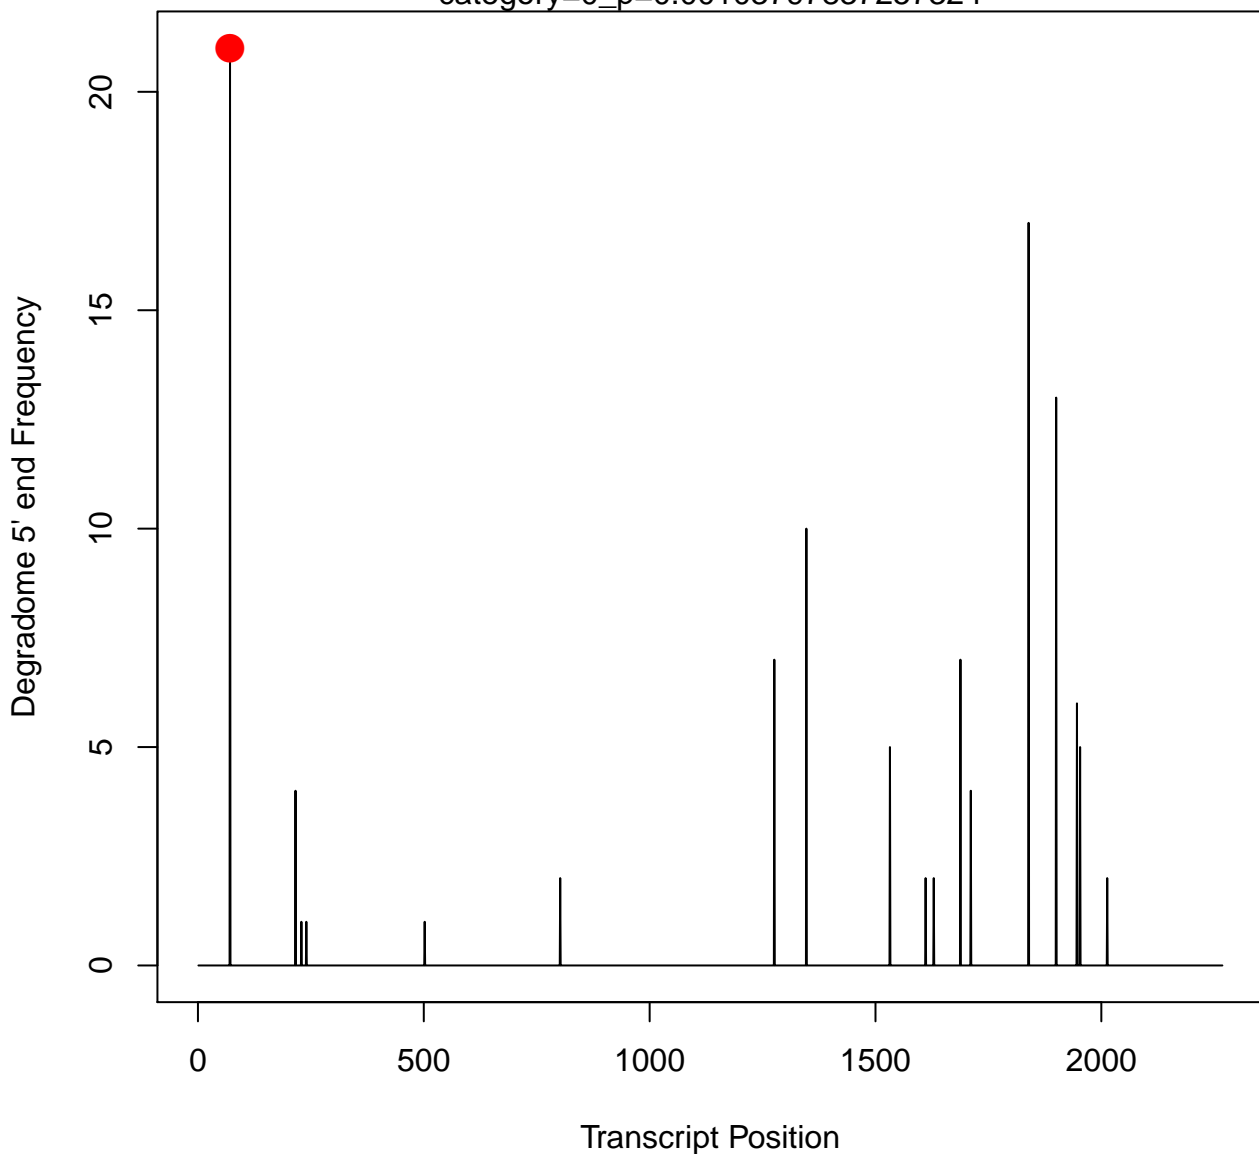

Supplement: Data_Sheet_1.zip [file Data_Sheet_1.zip]

**T=evm.model.LG02.4727\_Q=miRN8-5p\_S=1756**

category=0\_p=0.00775862610766487

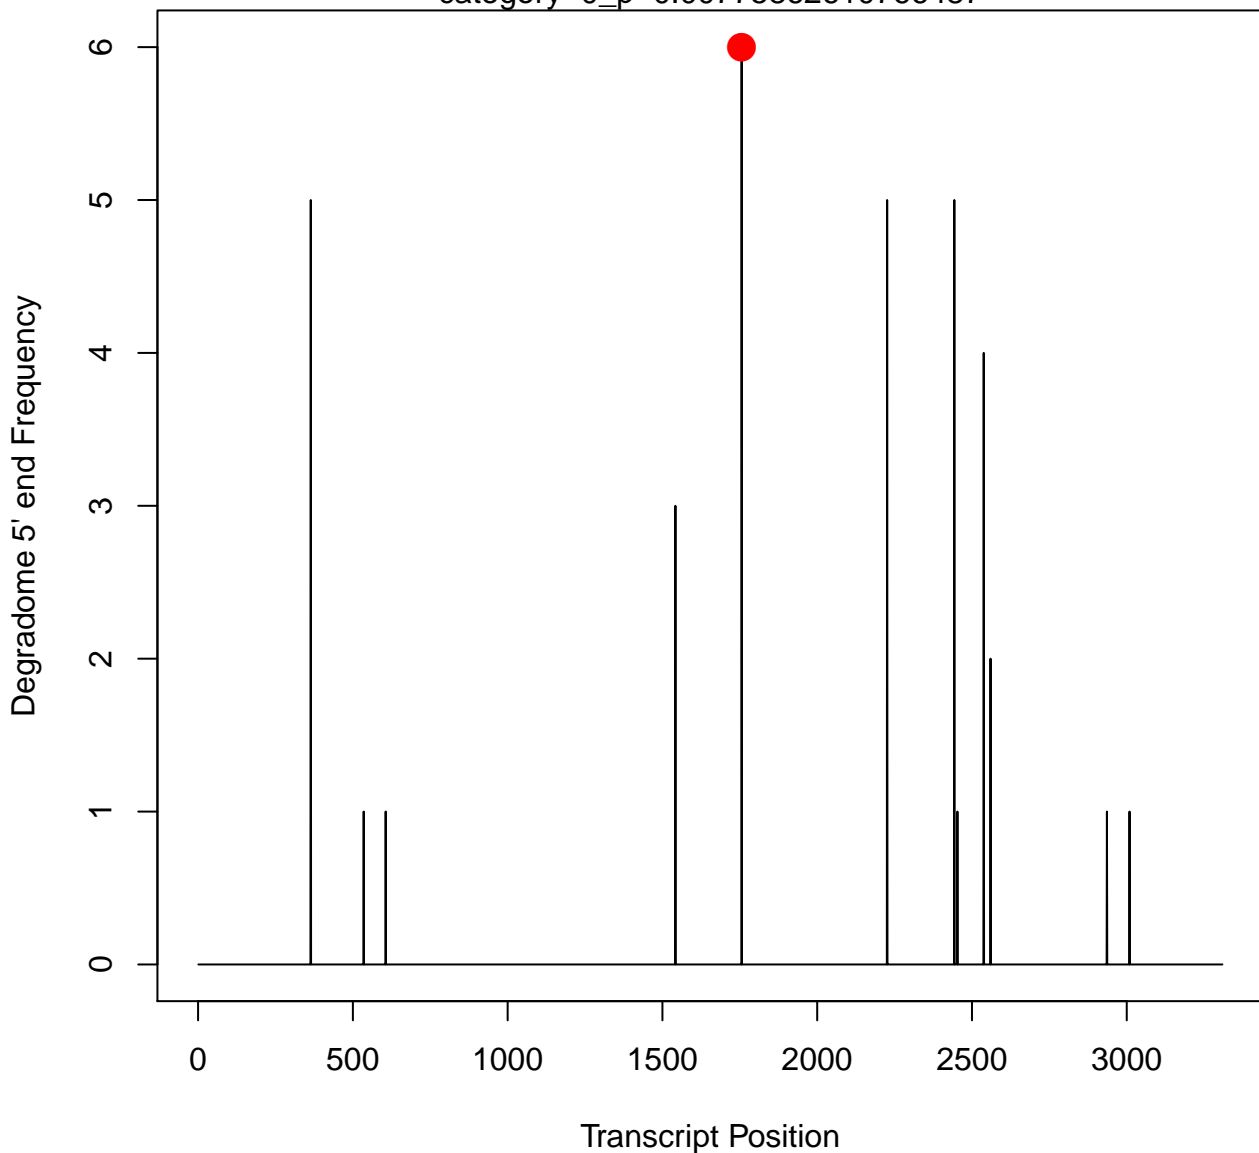

Supplement: Data_Sheet_1.zip [file Data_Sheet_1.zip]

**T=evm.model.LG02.5698\_Q=miR171f-3p\_S=1058**

category=2\_p=0.0260209548157995

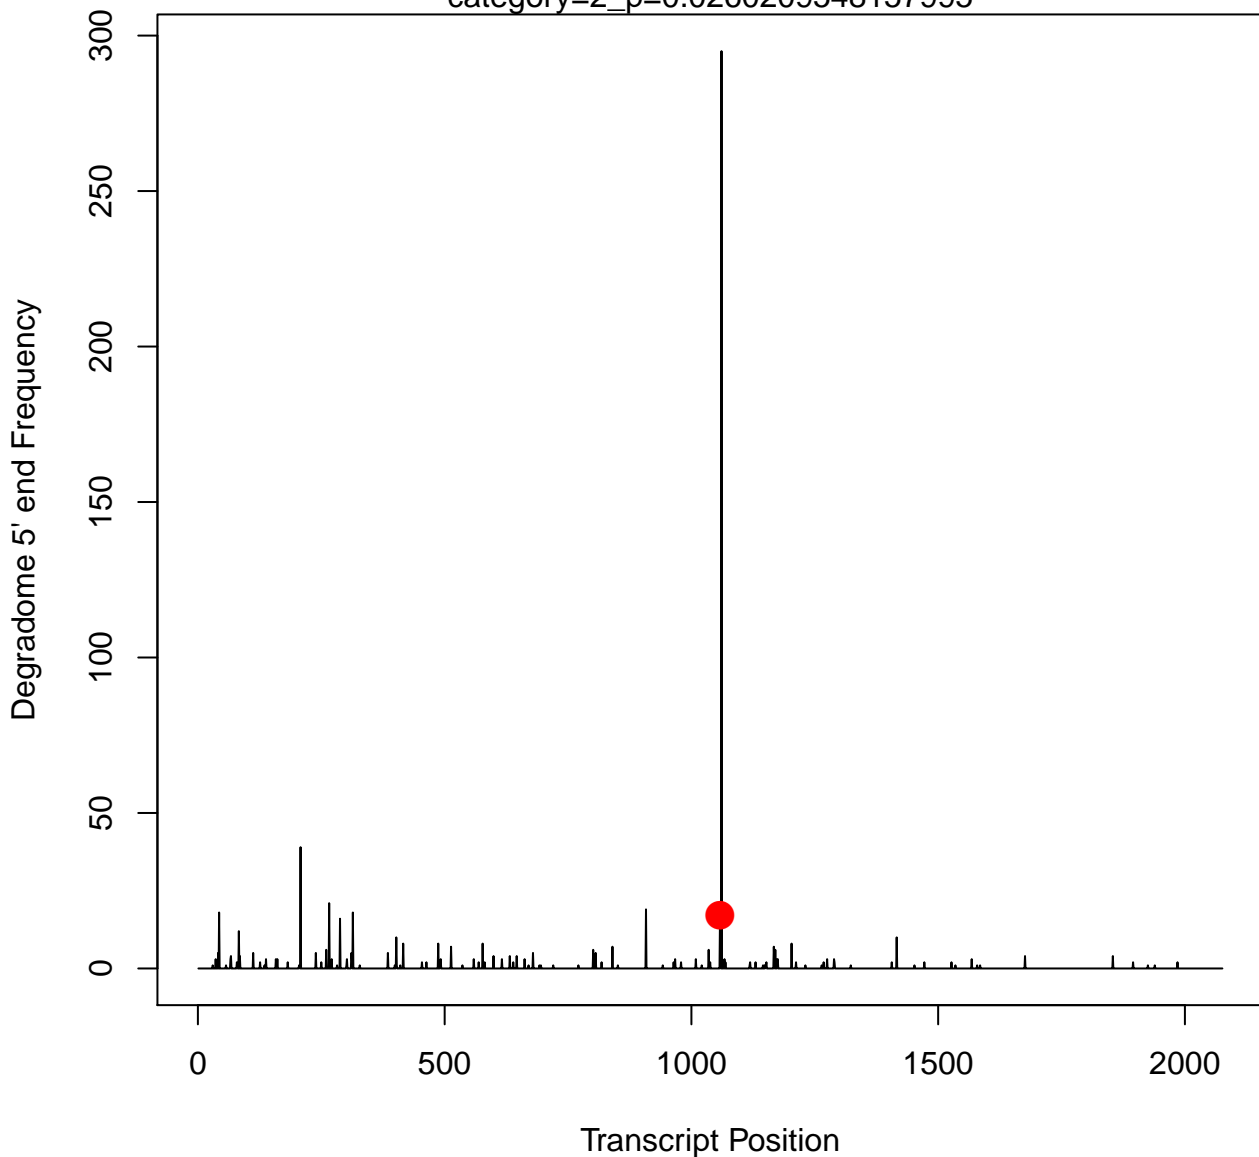

Supplement: Data_Sheet_1.zip [file Data_Sheet_1.zip]

**T=evm.model.LG05.3668\_Q=miR6275-5p\_S=209**

category=1\_p=0.0474175120011409

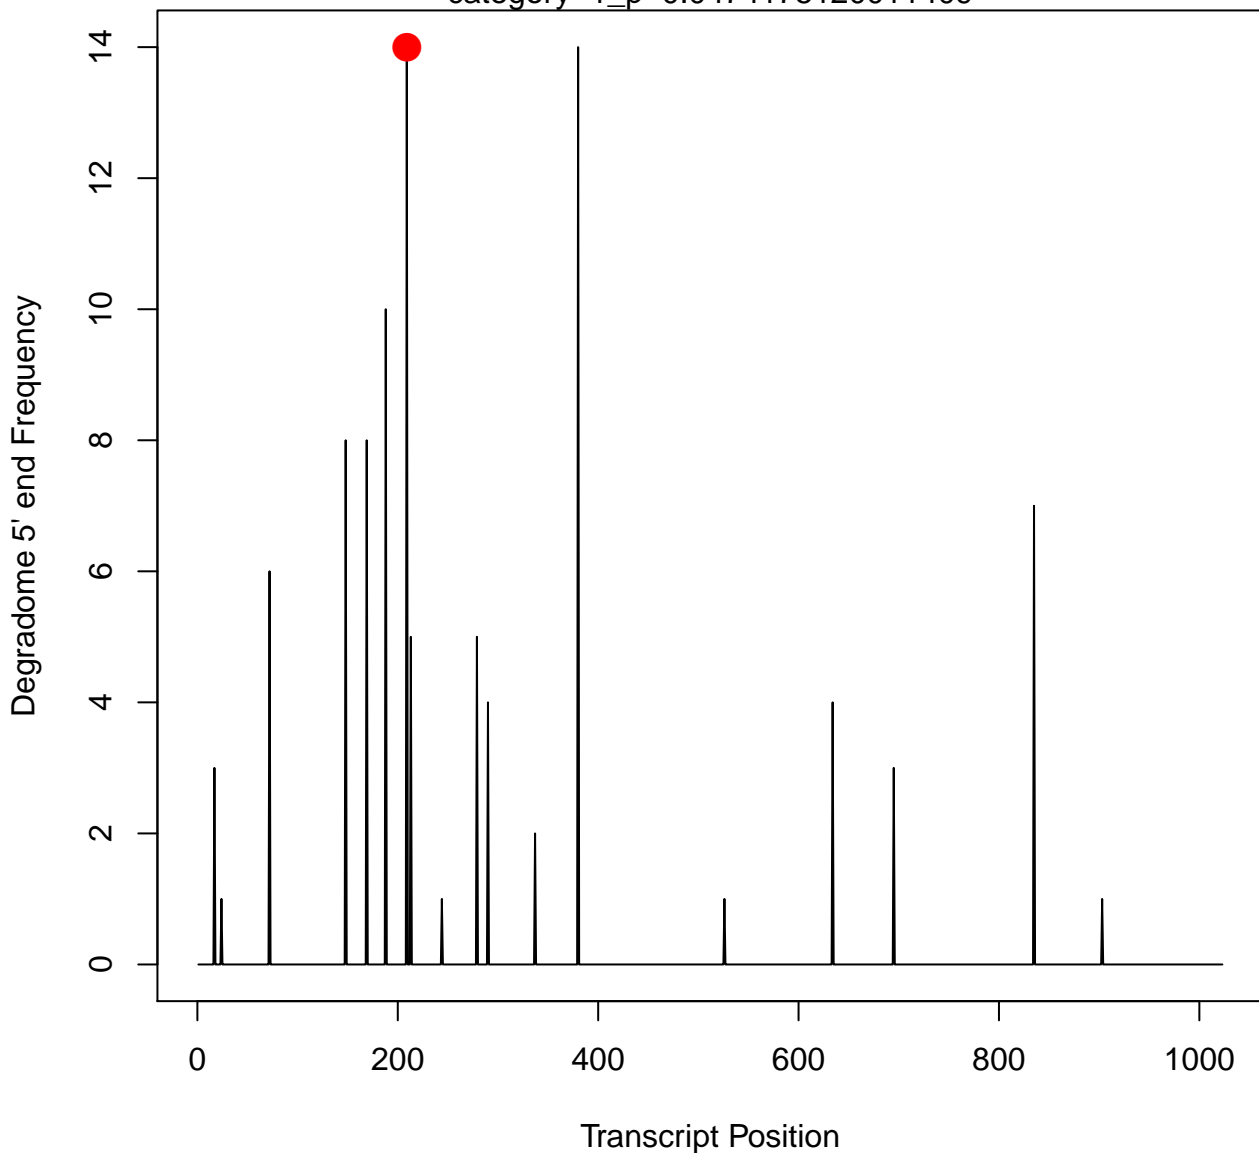

Supplement: Data_Sheet_1.zip [file Data_Sheet_1.zip]

**T=evm.model.LG05.2085\_Q=miR171a-3p\_S=551**

category=0\_p=0.00155656346427469

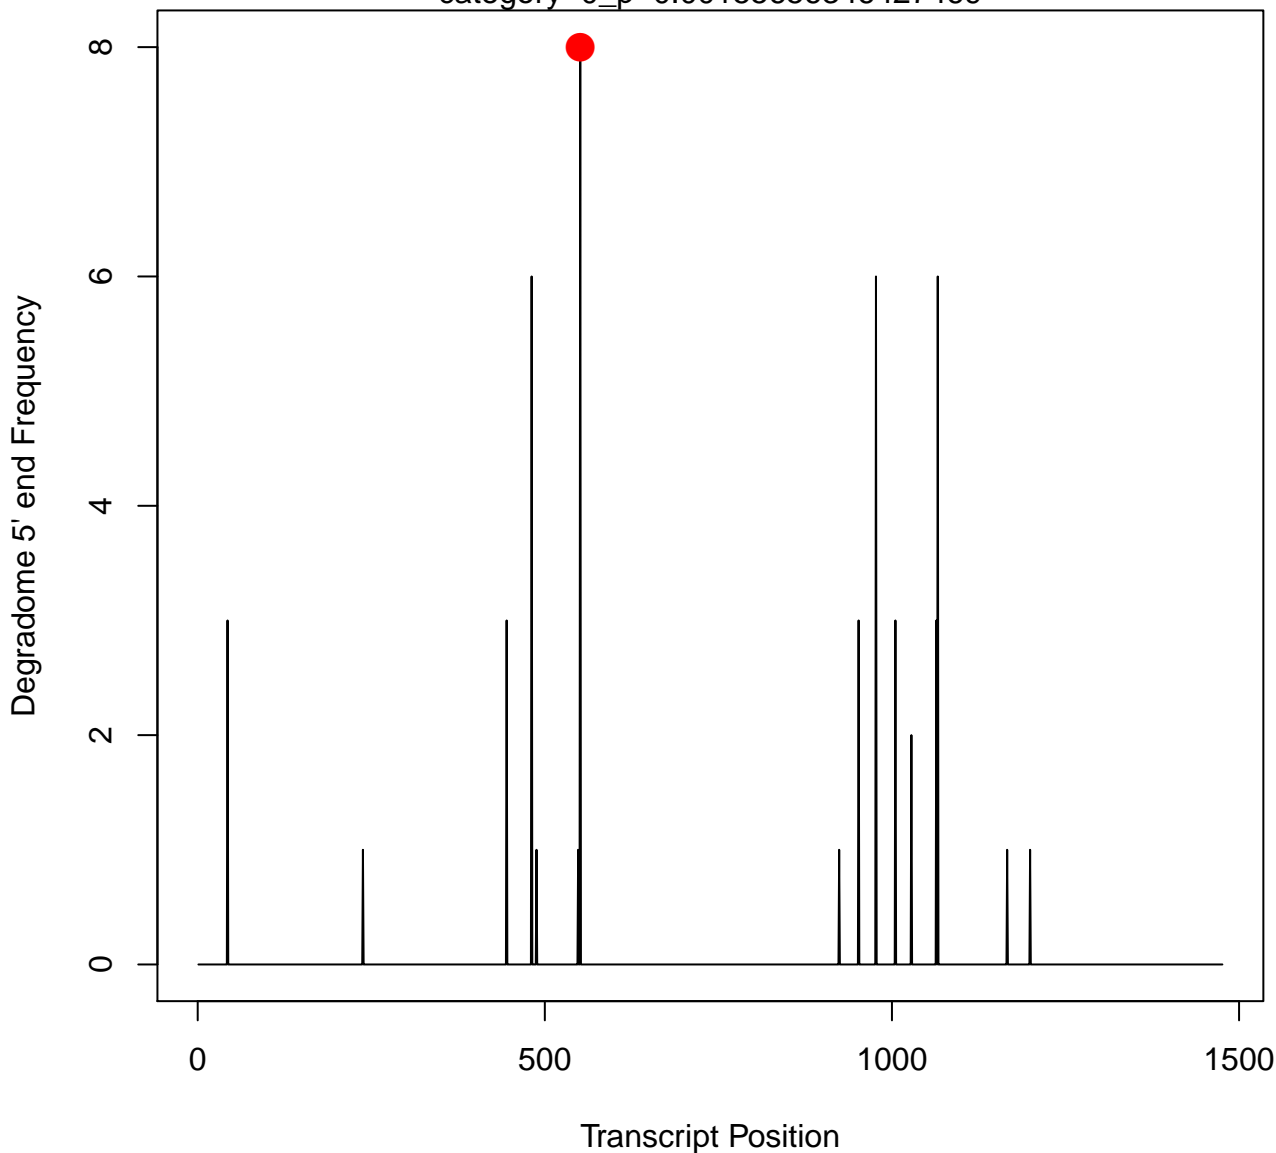

Supplement: Data_Sheet_1.zip [file Data_Sheet_1.zip]

**T=evm.model.LG07.1712\_Q=miR7122a-5p\_S=64**

category=0\_p=0.00103797837257324

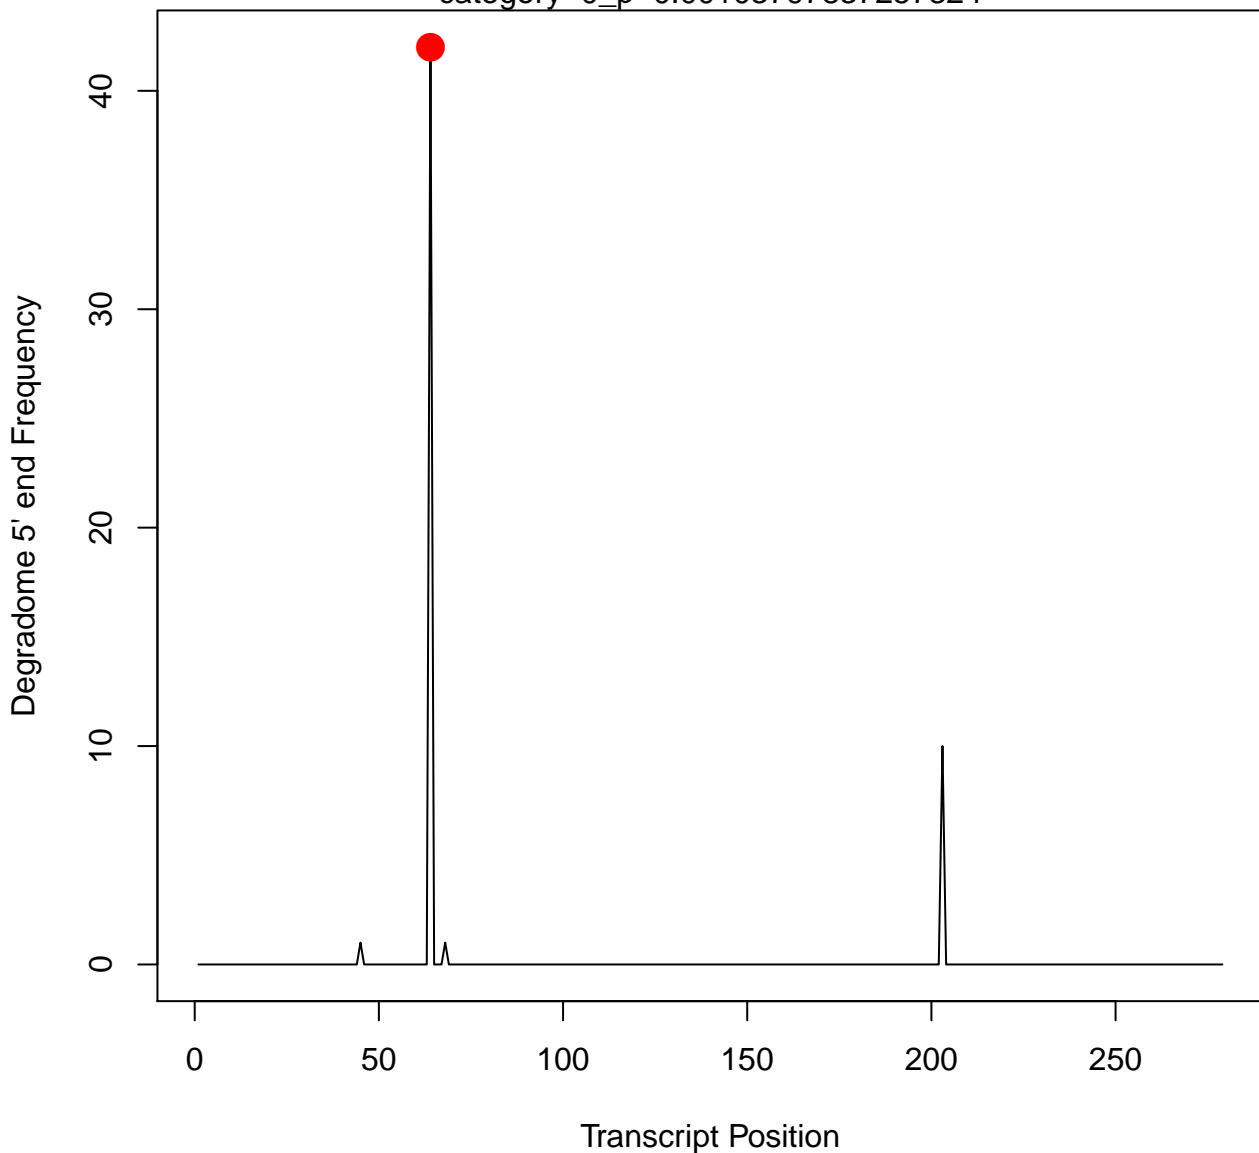

Supplement: Data_Sheet_1.zip [file Data_Sheet_1.zip]

**T=evm.model.LG05.25\_Q=miR162-3p\_S=2829**

category=3\_p=0.012146249673191

Degradome 5' end Frequency

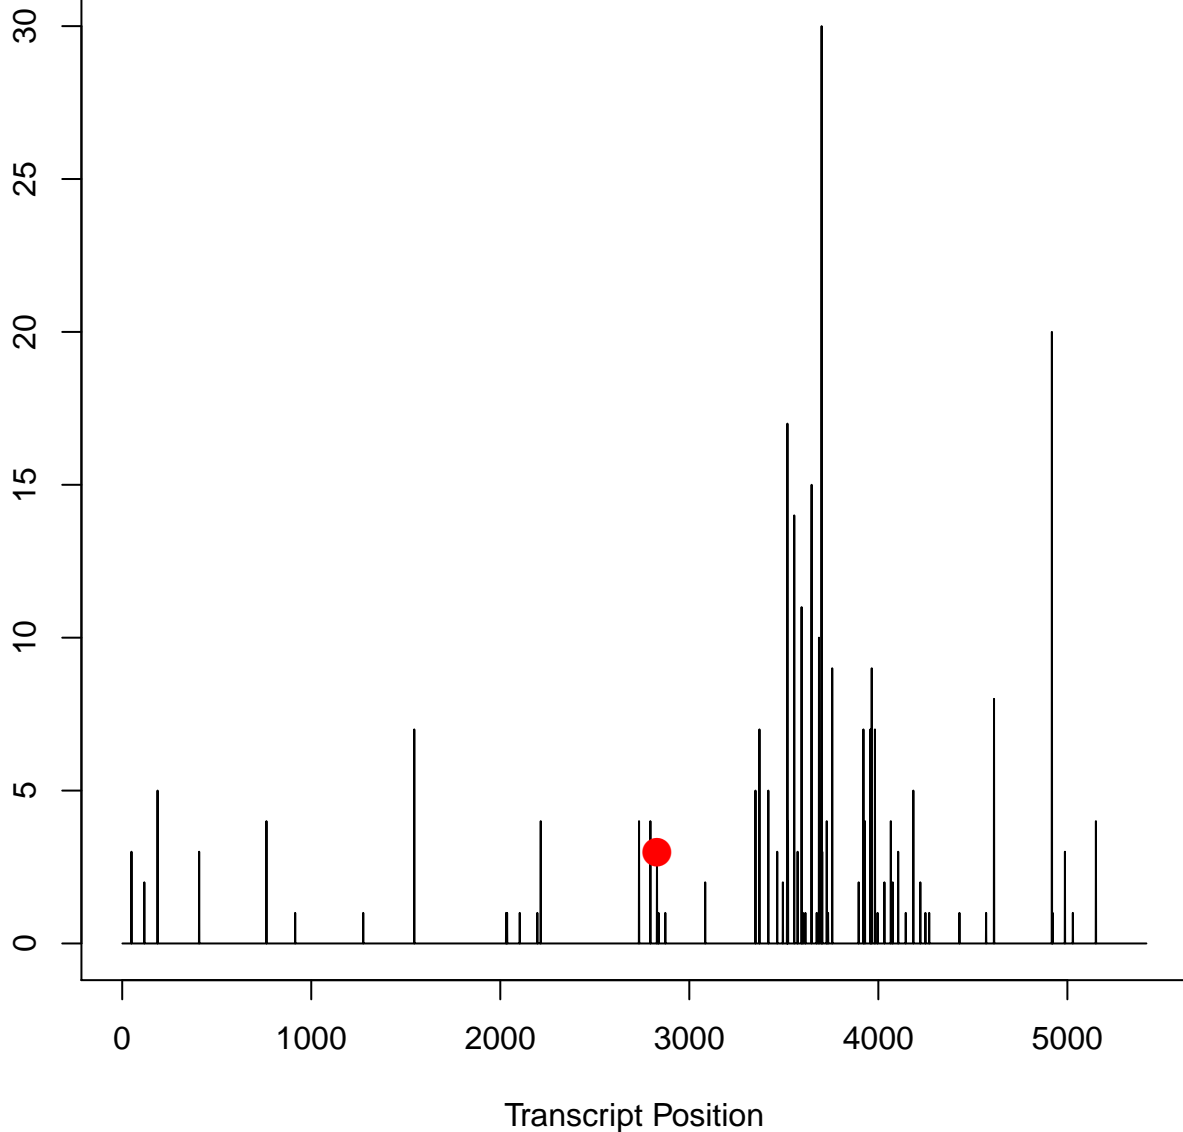

Supplement: Data_Sheet_1.zip [file Data_Sheet_1.zip]

**T=evm.model.LG01.2348\_Q=miR160d-5p\_S=1178**

category=0\_p=0.00155656346427469

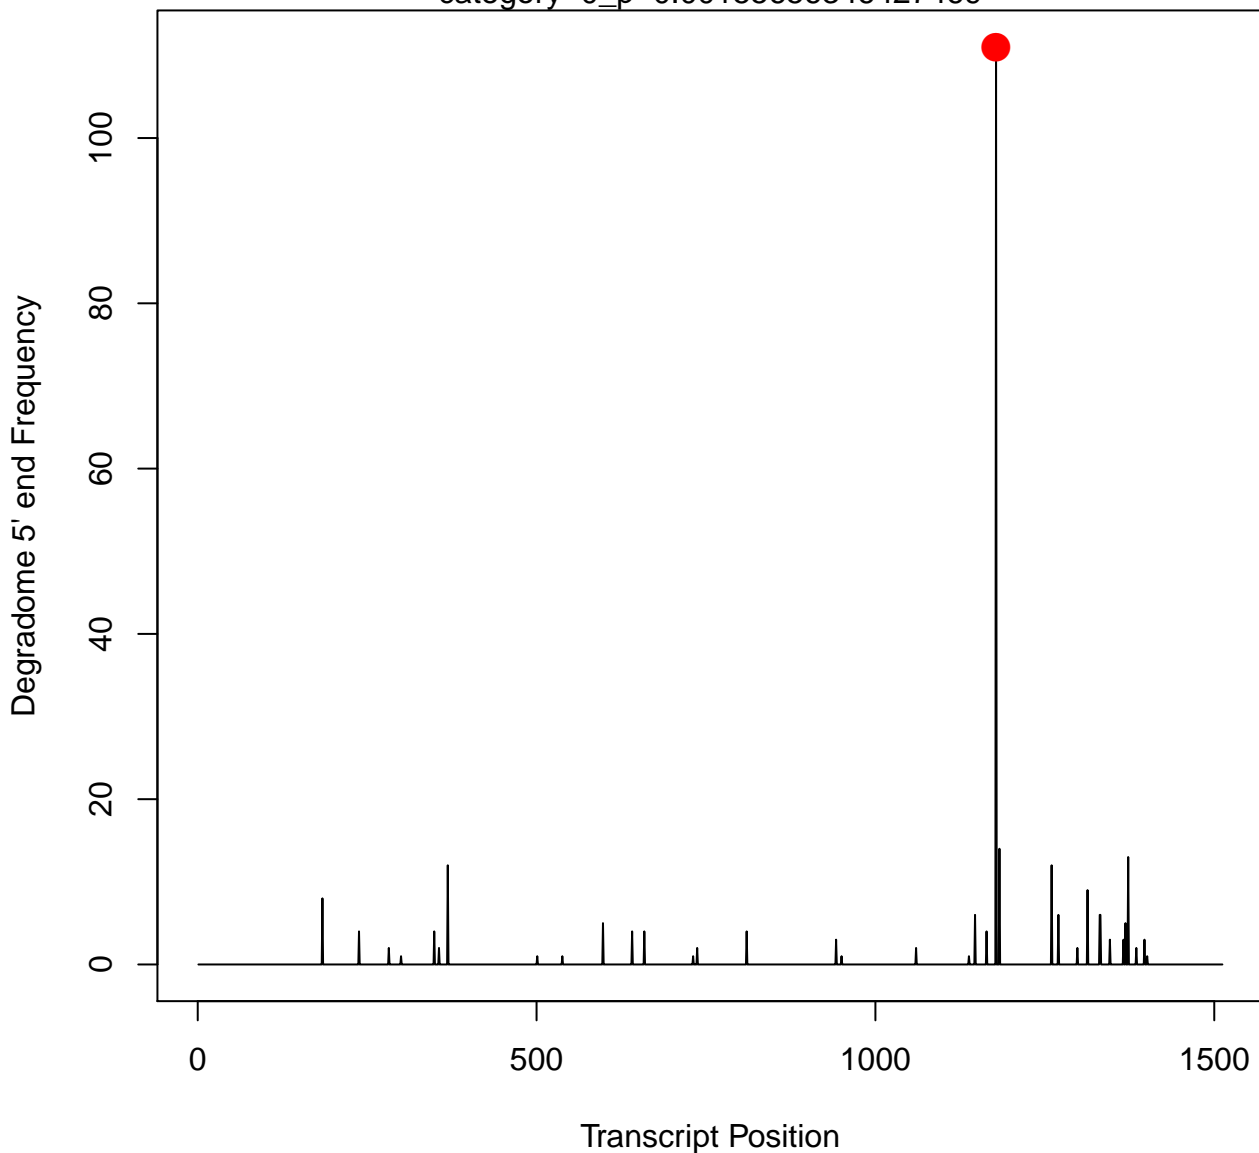

Supplement: Data_Sheet_1.zip [file Data_Sheet_1.zip]

**T=evm.model.LG03.4889\_Q=miR160c-3p\_S=326**

category=3\_p=0.0477069564524738

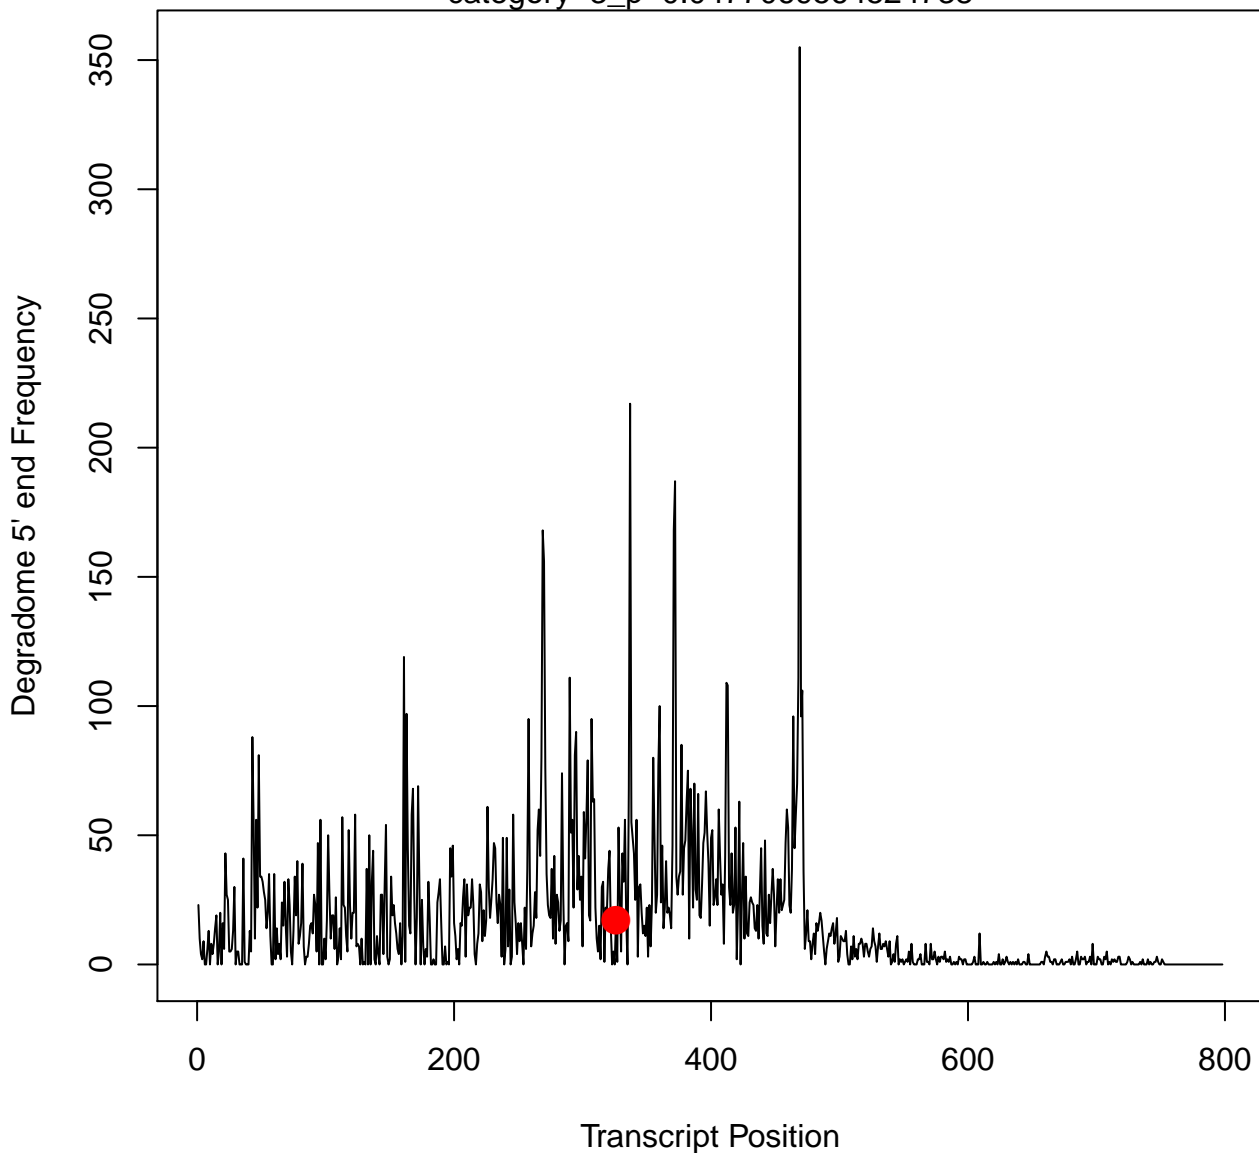

Supplement: Data_Sheet_1.zip [file Data_Sheet_1.zip]

**T=evm.model.LG02.2447\_Q=miR396b-5p\_S=383**

category=0\_p=0.00466242549475071

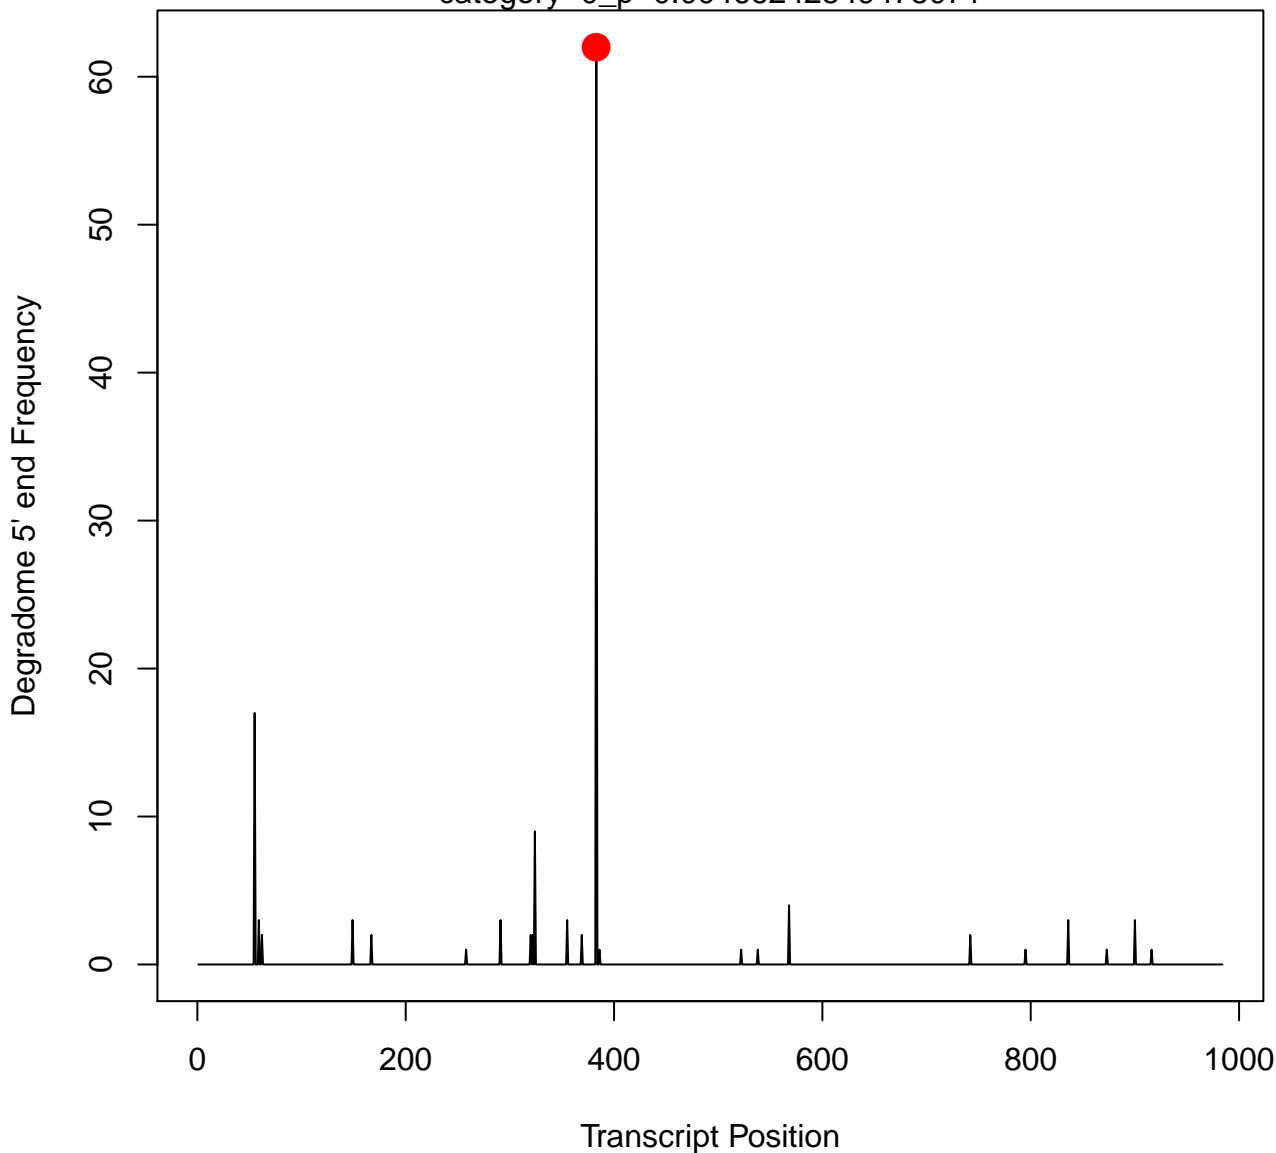

Supplement: Data_Sheet_1.zip [file Data_Sheet_1.zip]

**T=evm.model.LG02.692\_Q=miRN7-5p\_S=755**

category=4\_p=0.00862274555333054

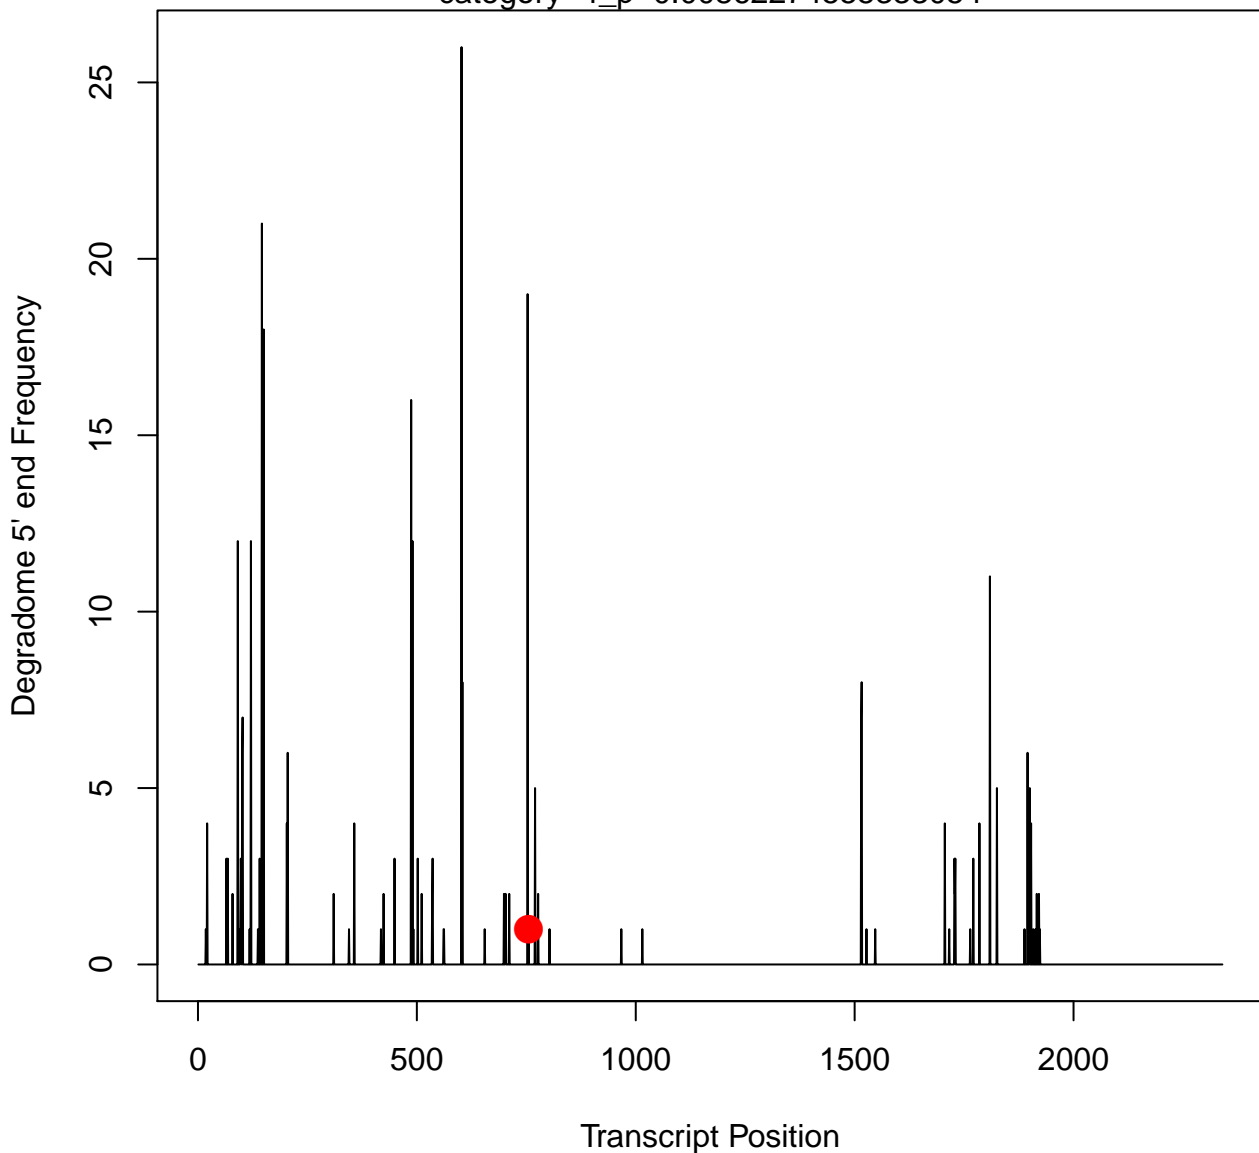

Supplement: Data_Sheet_1.zip [file Data_Sheet_1.zip]

**T=evm.model.LG01.5728\_Q=miR172a-3p\_S=1243**

category=2\_p=0.00874999063480097

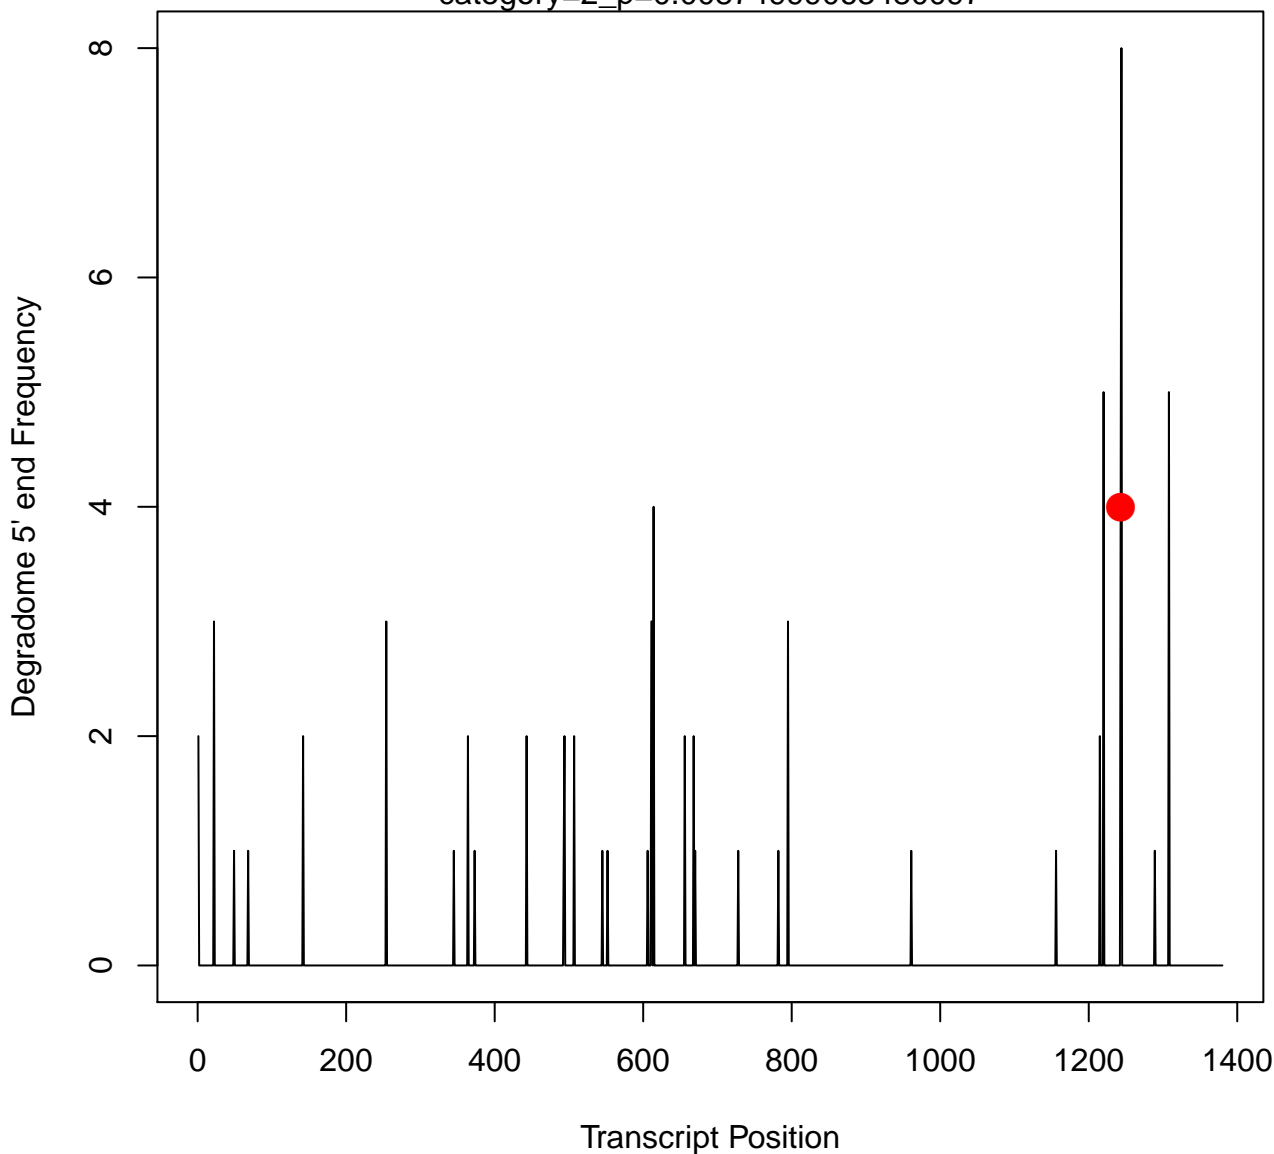

Supplement: Data_Sheet_1.zip [file Data_Sheet_1.zip]

**T=evm.model.LG08.1351\_Q=miR319d-3p\_S=911**

category=1\_p=0.00133003455890757

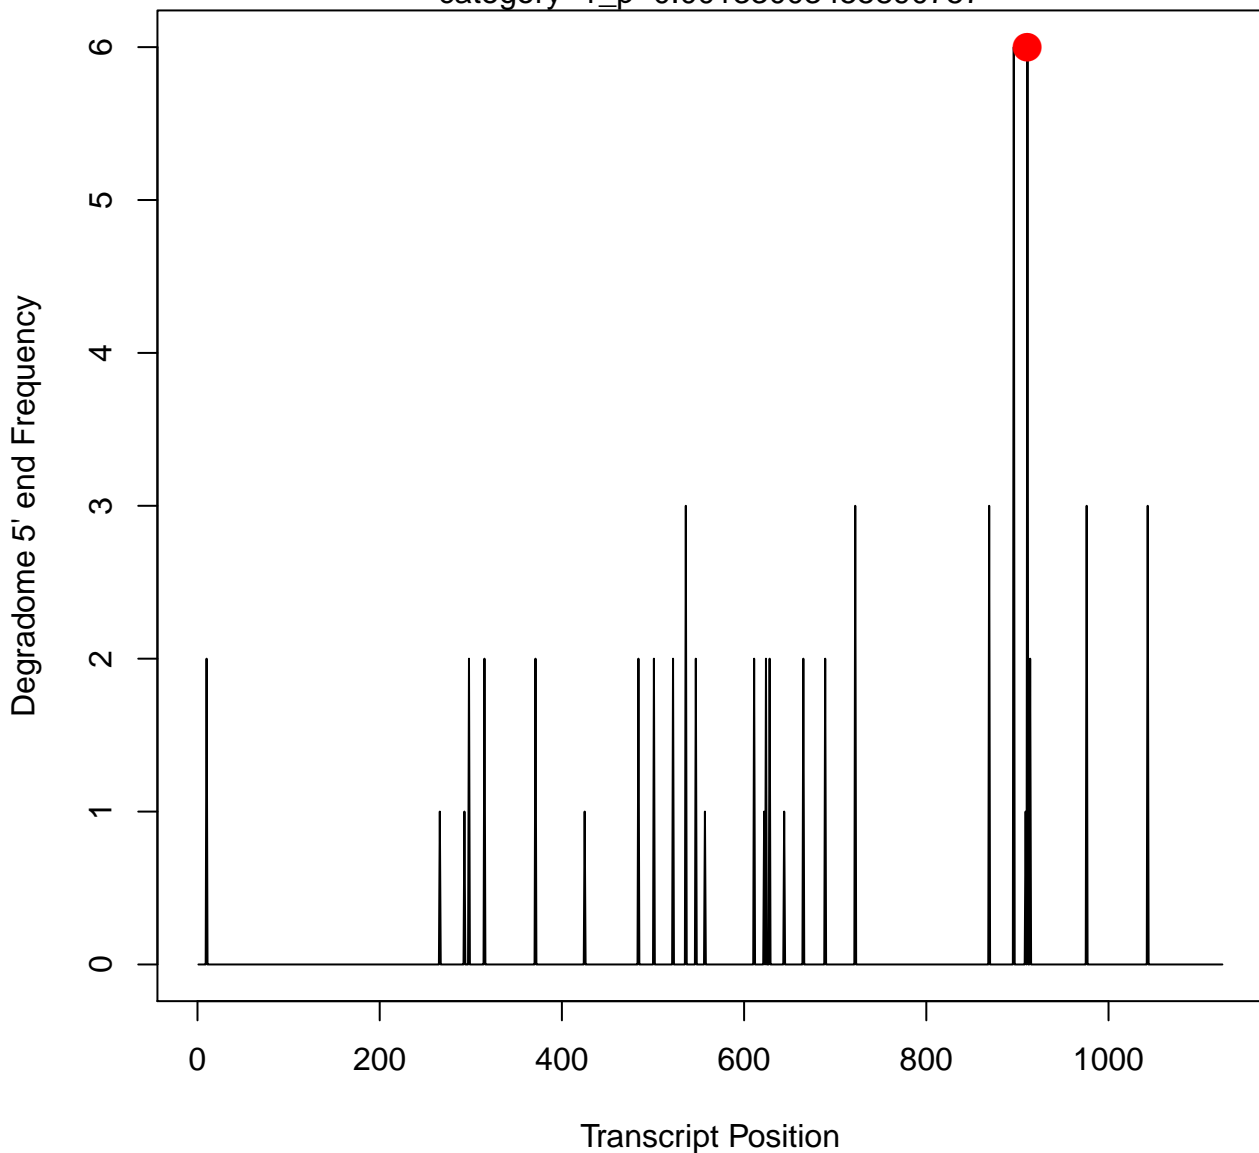

Supplement: Data_Sheet_1.zip [file Data_Sheet_1.zip]

**T=evm.model.LG02.6040\_Q=miR482-3p\_S=108**

category=0\_p=0.00362821312893646

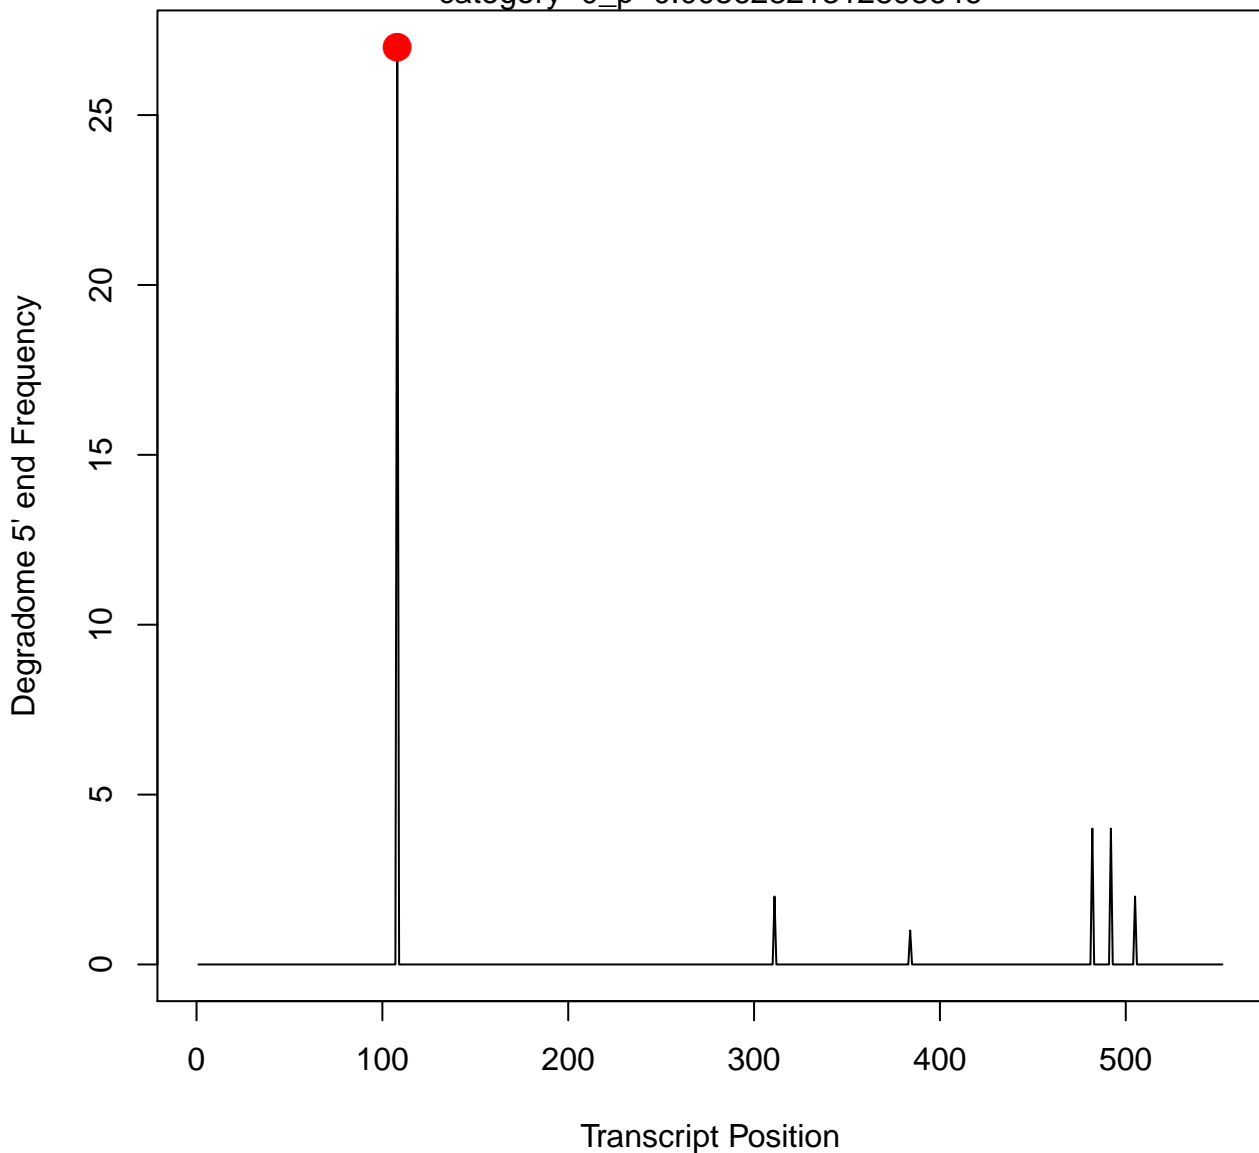

Supplement: Data_Sheet_1.zip [file Data_Sheet_1.zip]

**T=evm.model.LG06.4588\_Q=miR171a-3p\_S=998**

category=0\_p=0.00103797837257324

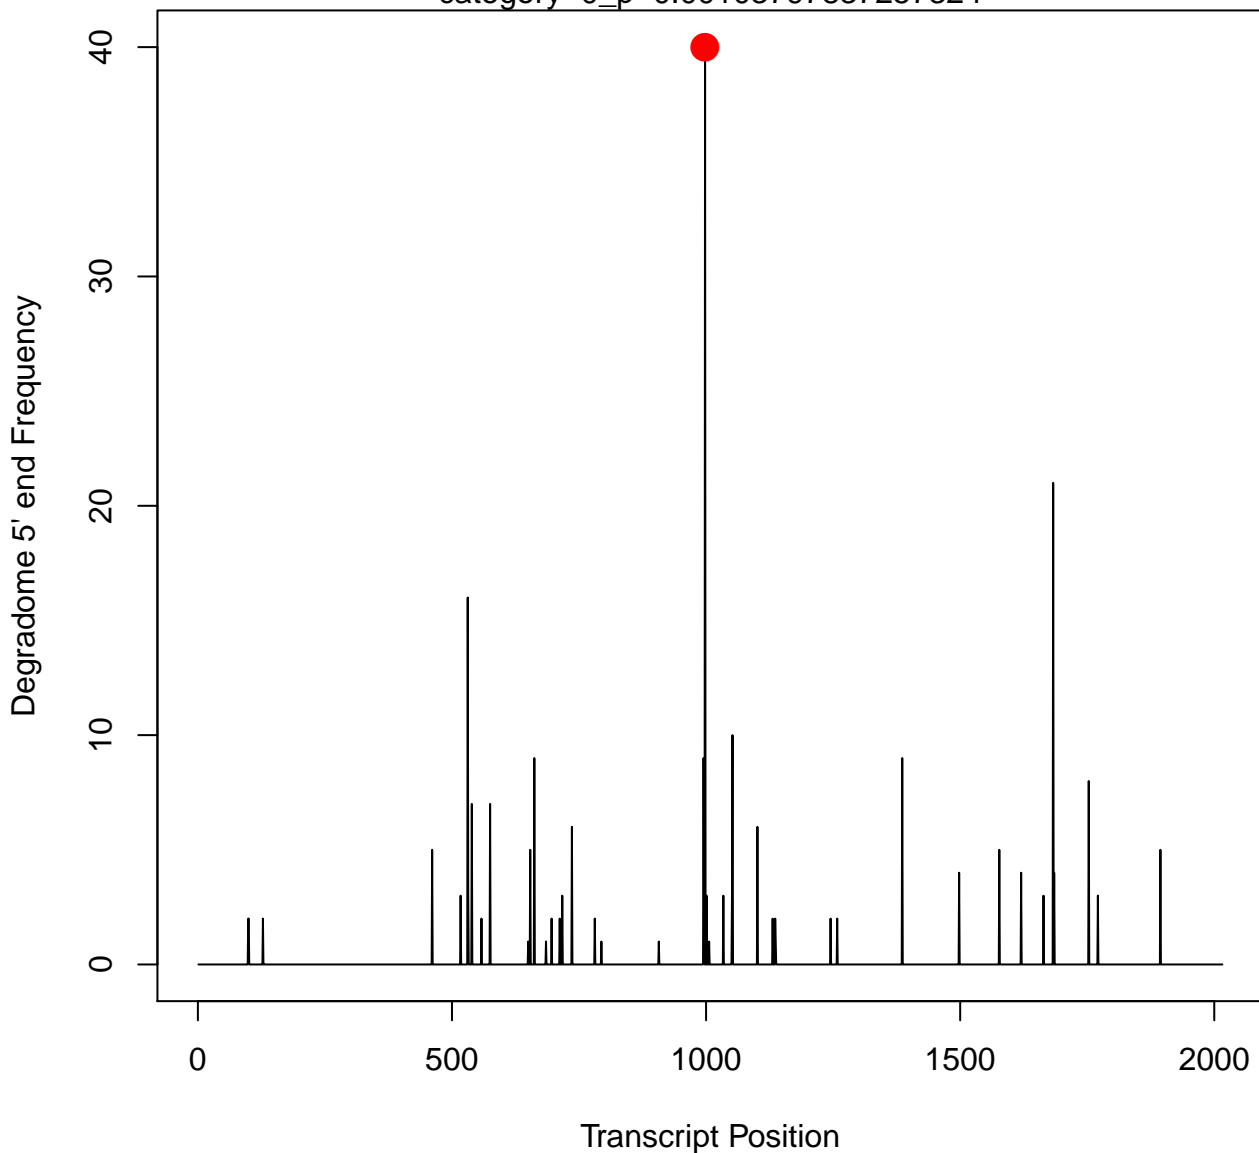

Supplement: Data_Sheet_1.zip [file Data_Sheet_1.zip]

**T=evm.model.LG01.5436\_Q=miR6275-3p\_S=116**

category=0\_p=0.00569556437049679

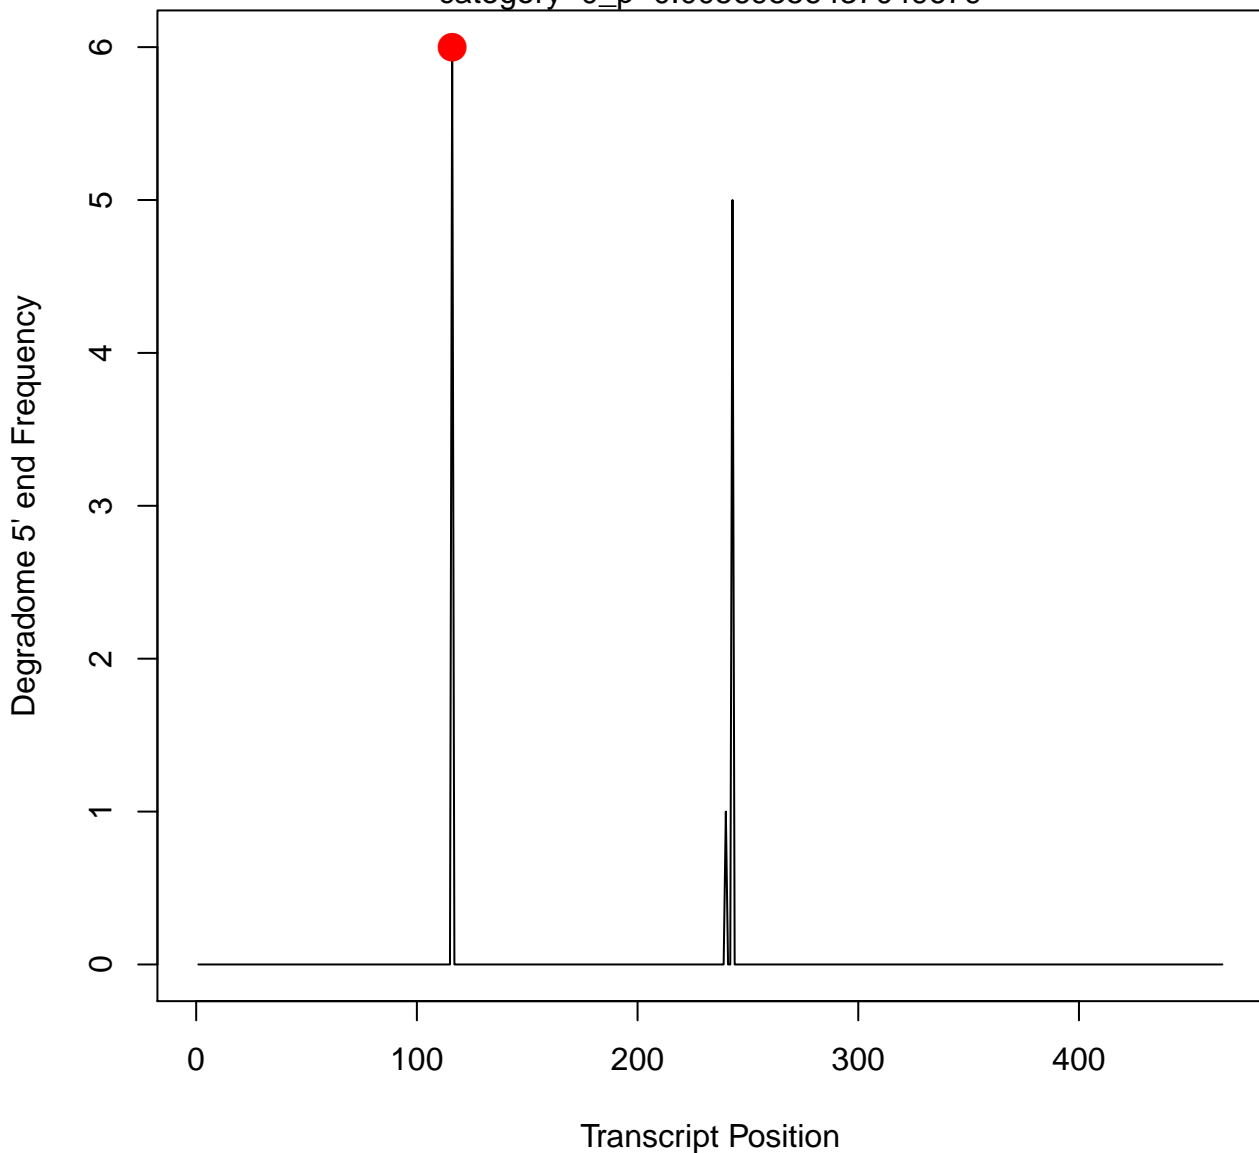

Supplement: Data_Sheet_1.zip [file Data_Sheet_1.zip]

**T=evm.model.LG05.3240\_Q=miRN11-5p\_S=976**

category=2\_p=0.0174234189334928

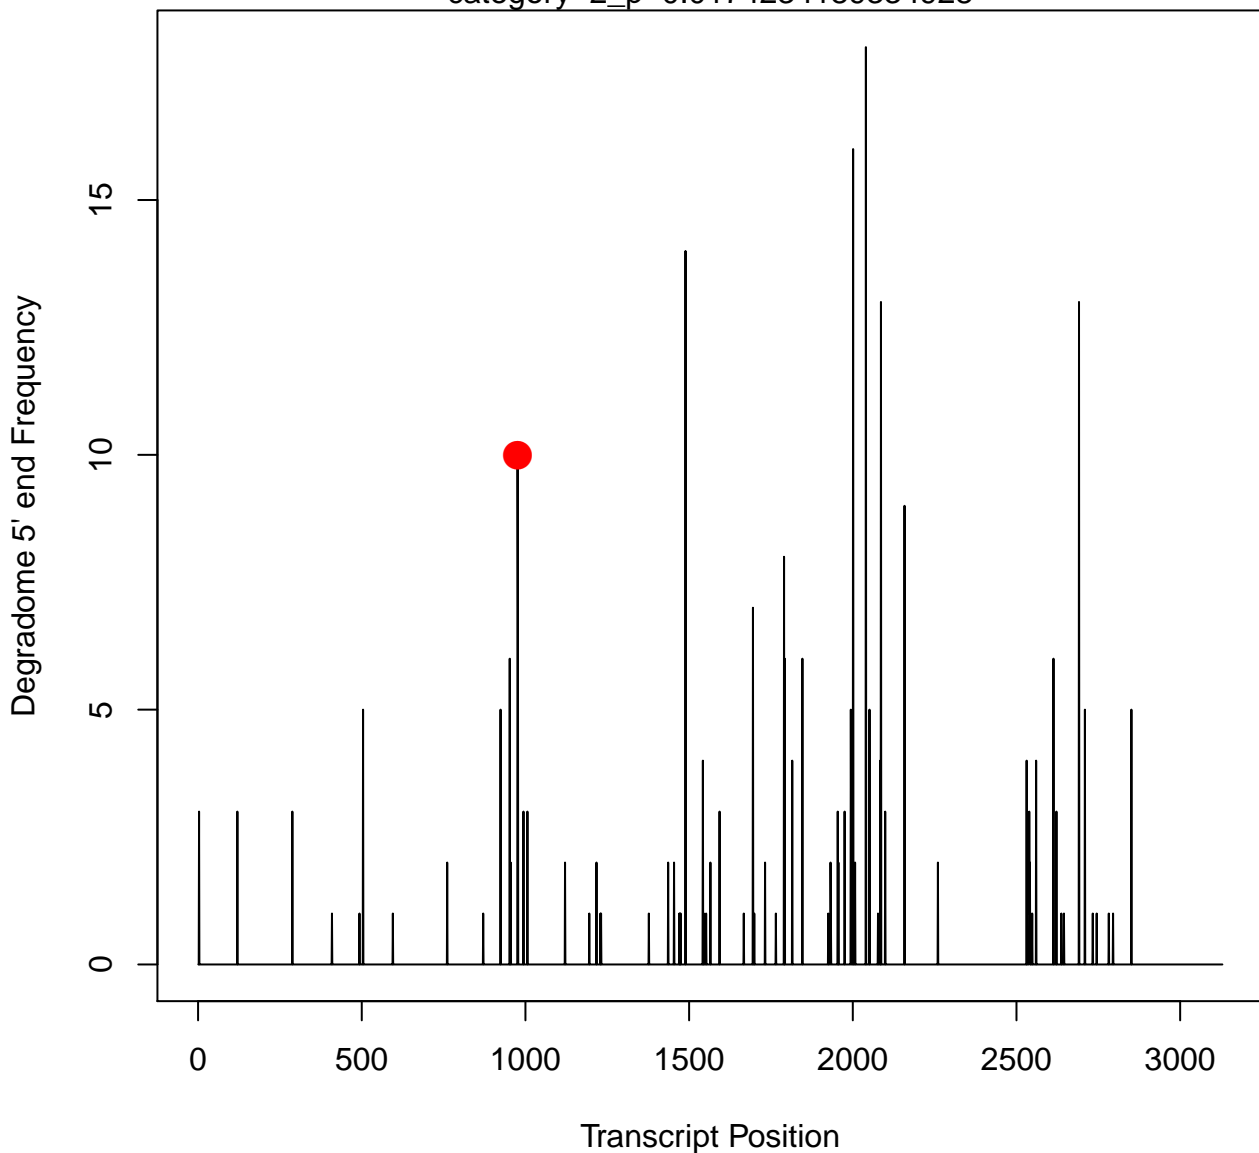

Supplement: Data_Sheet_1.zip [file Data_Sheet_1.zip]

**T=evm.model.LG01.2348\_Q=miR160c-5p\_S=1178**

category=0\_p=0.00155656346427469



Supplement: Data_Sheet_1.zip [file Data_Sheet_1.zip]

**T=evm.model.LG07.3896\_Q=miR164b-5p\_S=664**

category=0\_p=0.00103797837257324

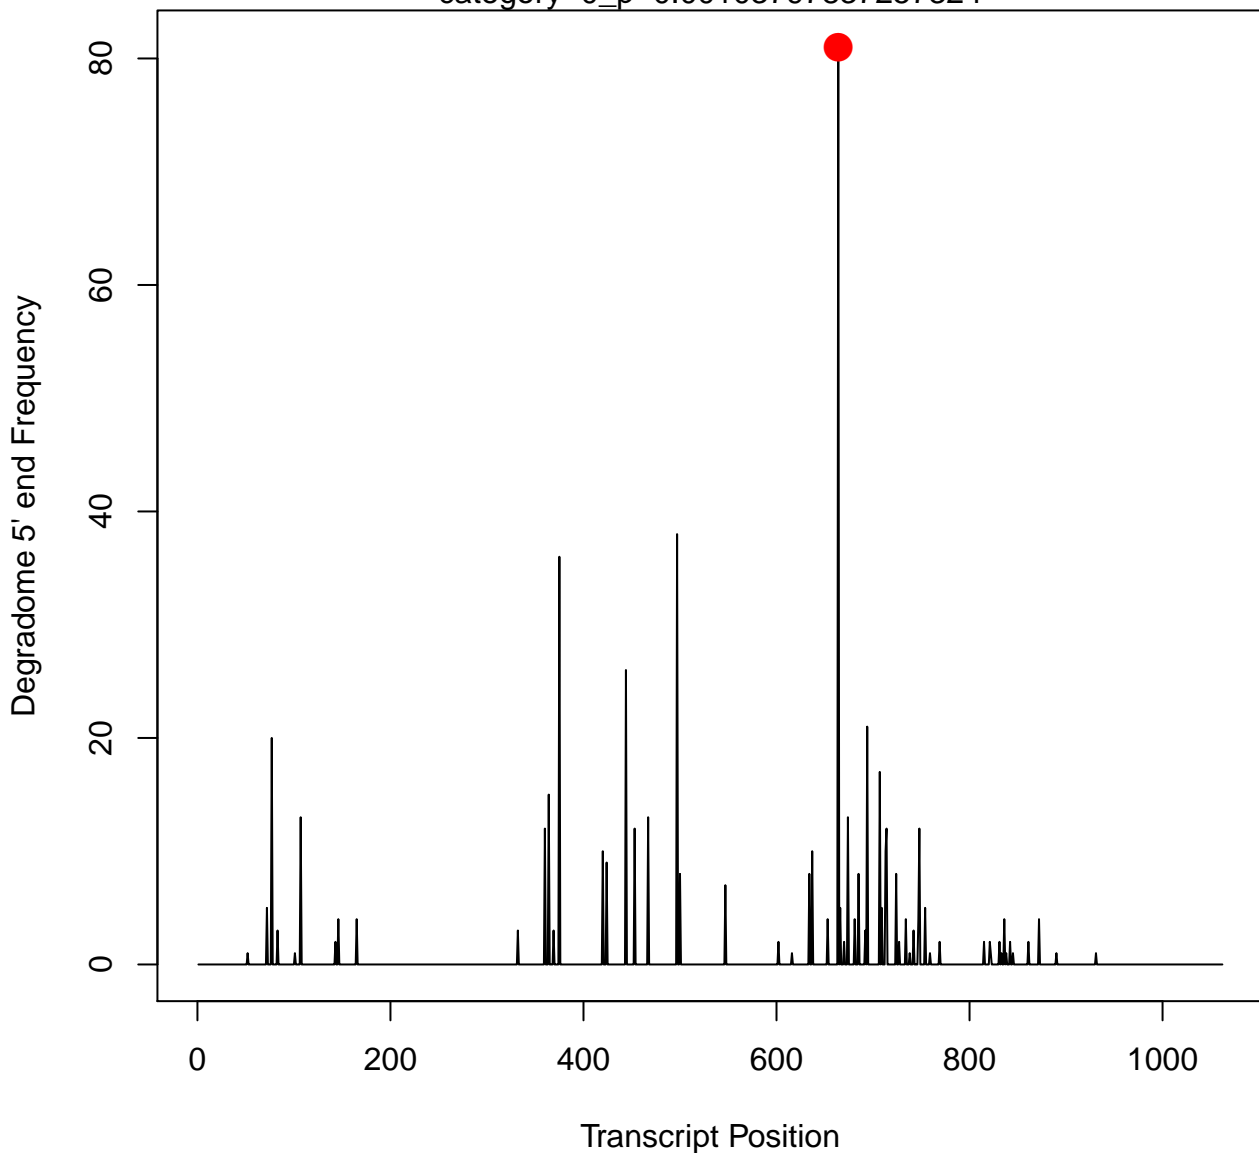

Supplement: Data_Sheet_1.zip [file Data_Sheet_1.zip]

**T=evm.model.LG02.1135\_Q=miR393a-5p\_S=1516**

category=2\_p=0.00874999063480097

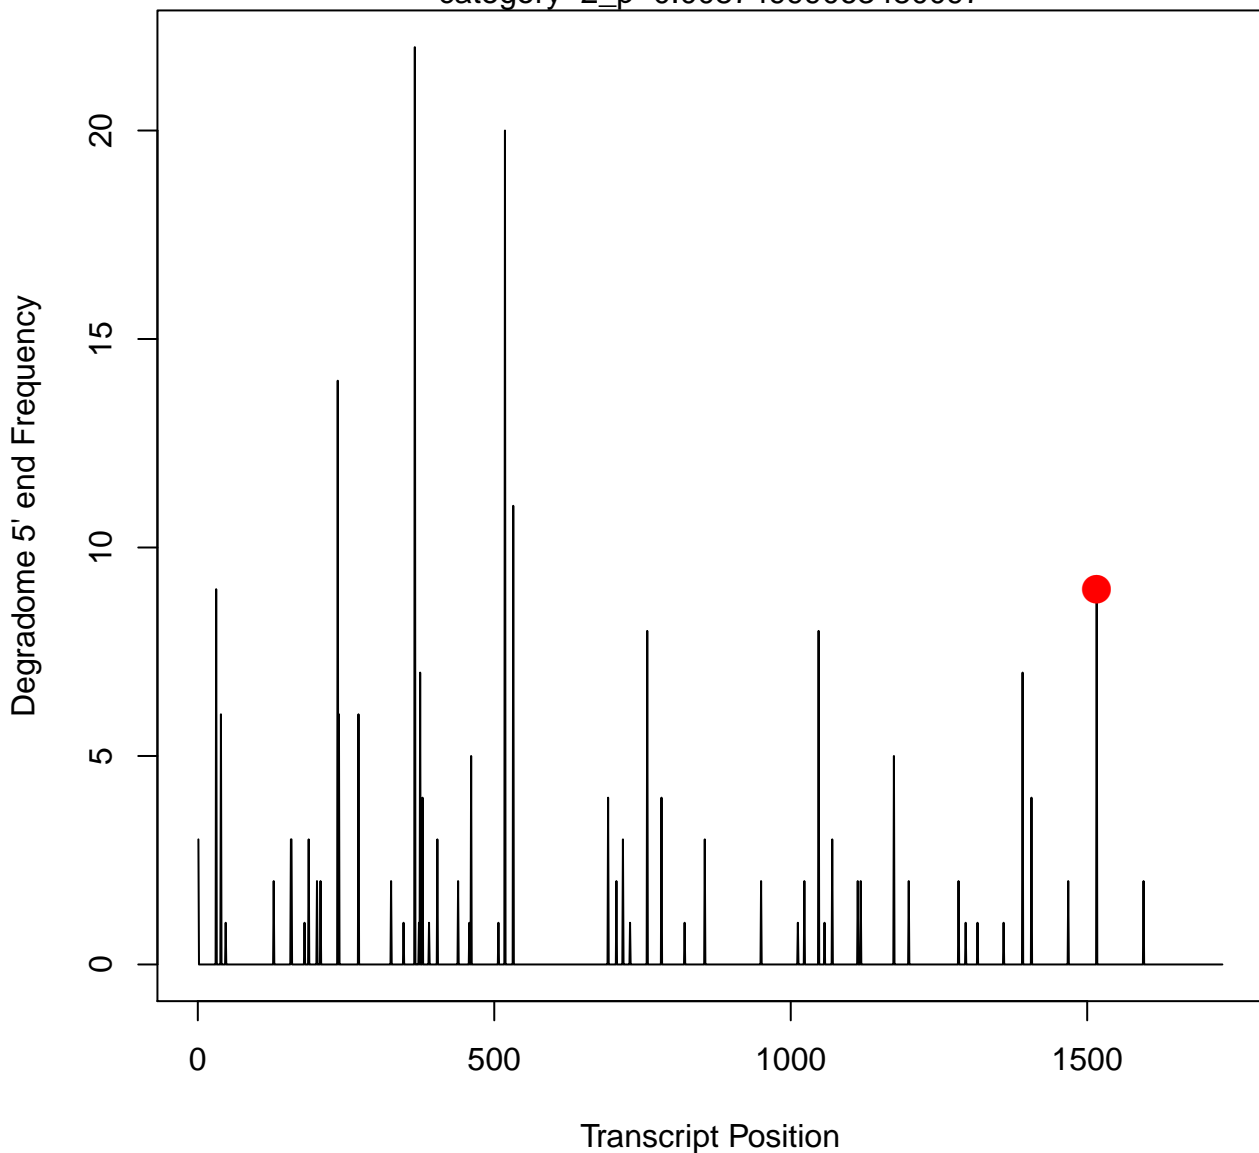

Supplement: Data_Sheet_1.zip [file Data_Sheet_1.zip]

**T=evm.model.LG03.2517\_Q=miR164a-5p\_S=649**

category=0\_p=0.00155656346427469

Degradome 5' end Frequency

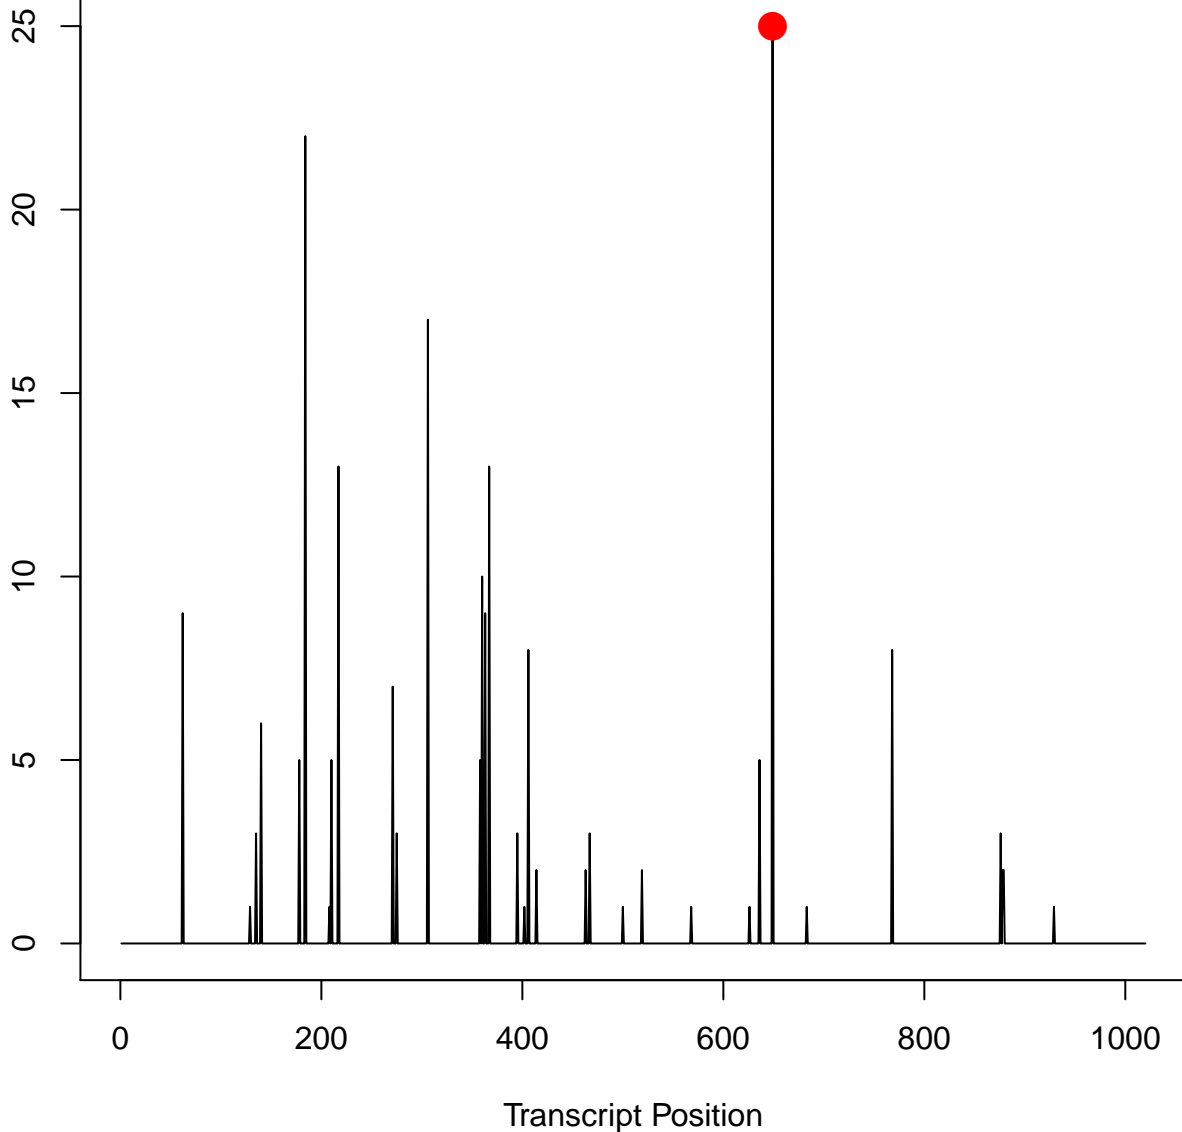

Supplement: Data_Sheet_1.zip [file Data_Sheet_1.zip]

**T=evm.model.LG06.170\_Q=miR169b-3p\_S=466**

category=2\_p=0.0345432623396535

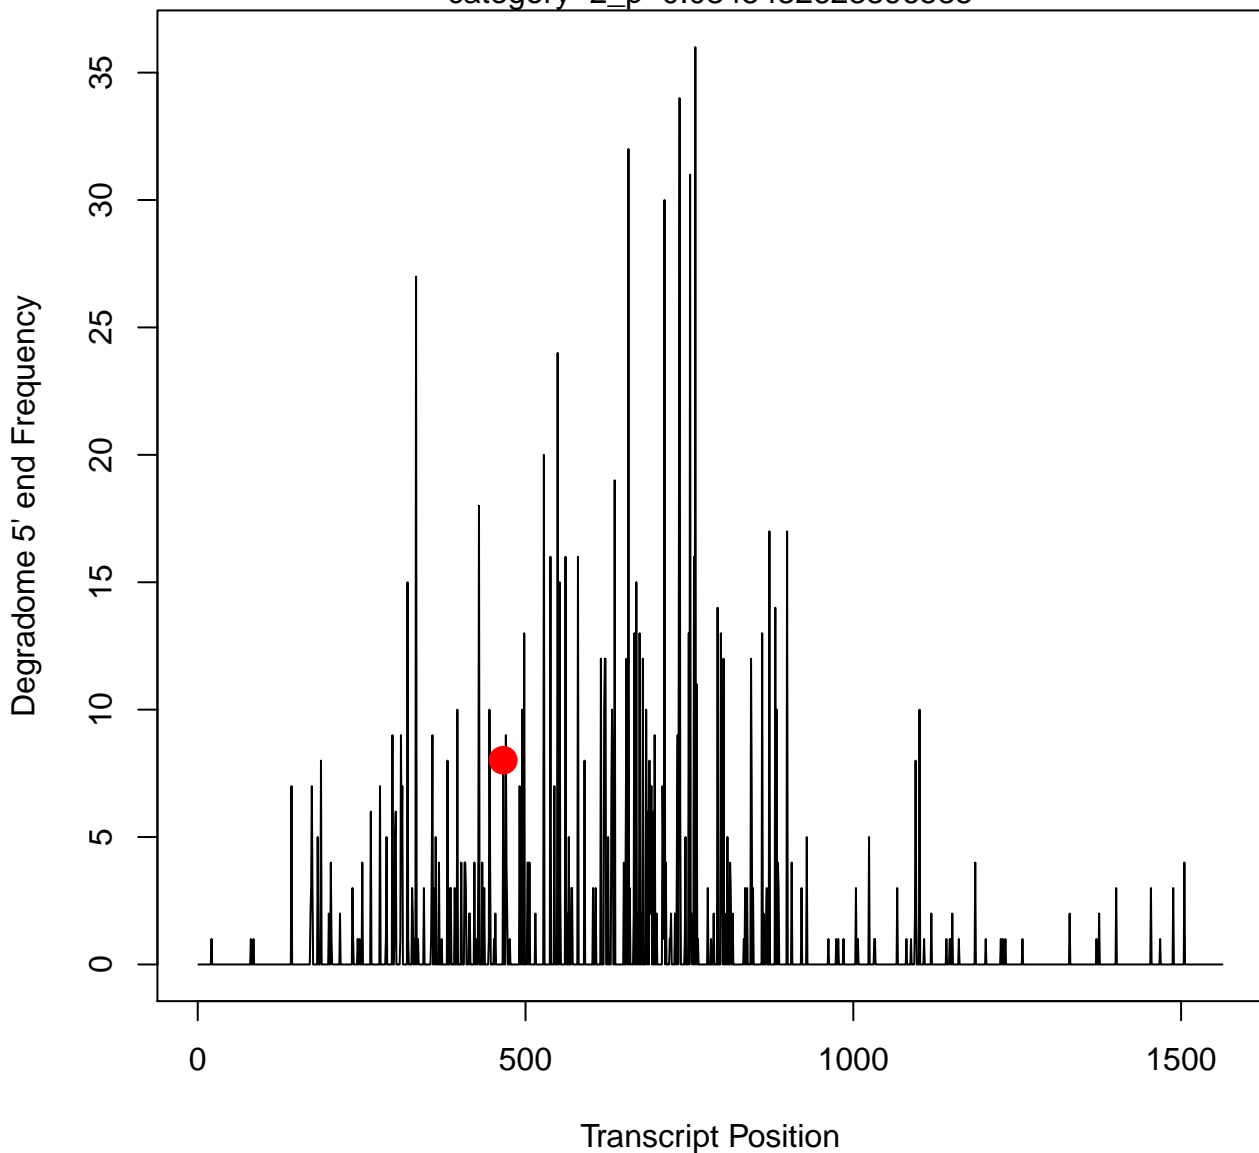

Supplement: Data_Sheet_1.zip [file Data_Sheet_1.zip]

**T=evm.model.LG02.5200\_Q=miR160a-5p\_S=1376**

category=0\_p=0.00051912393111464

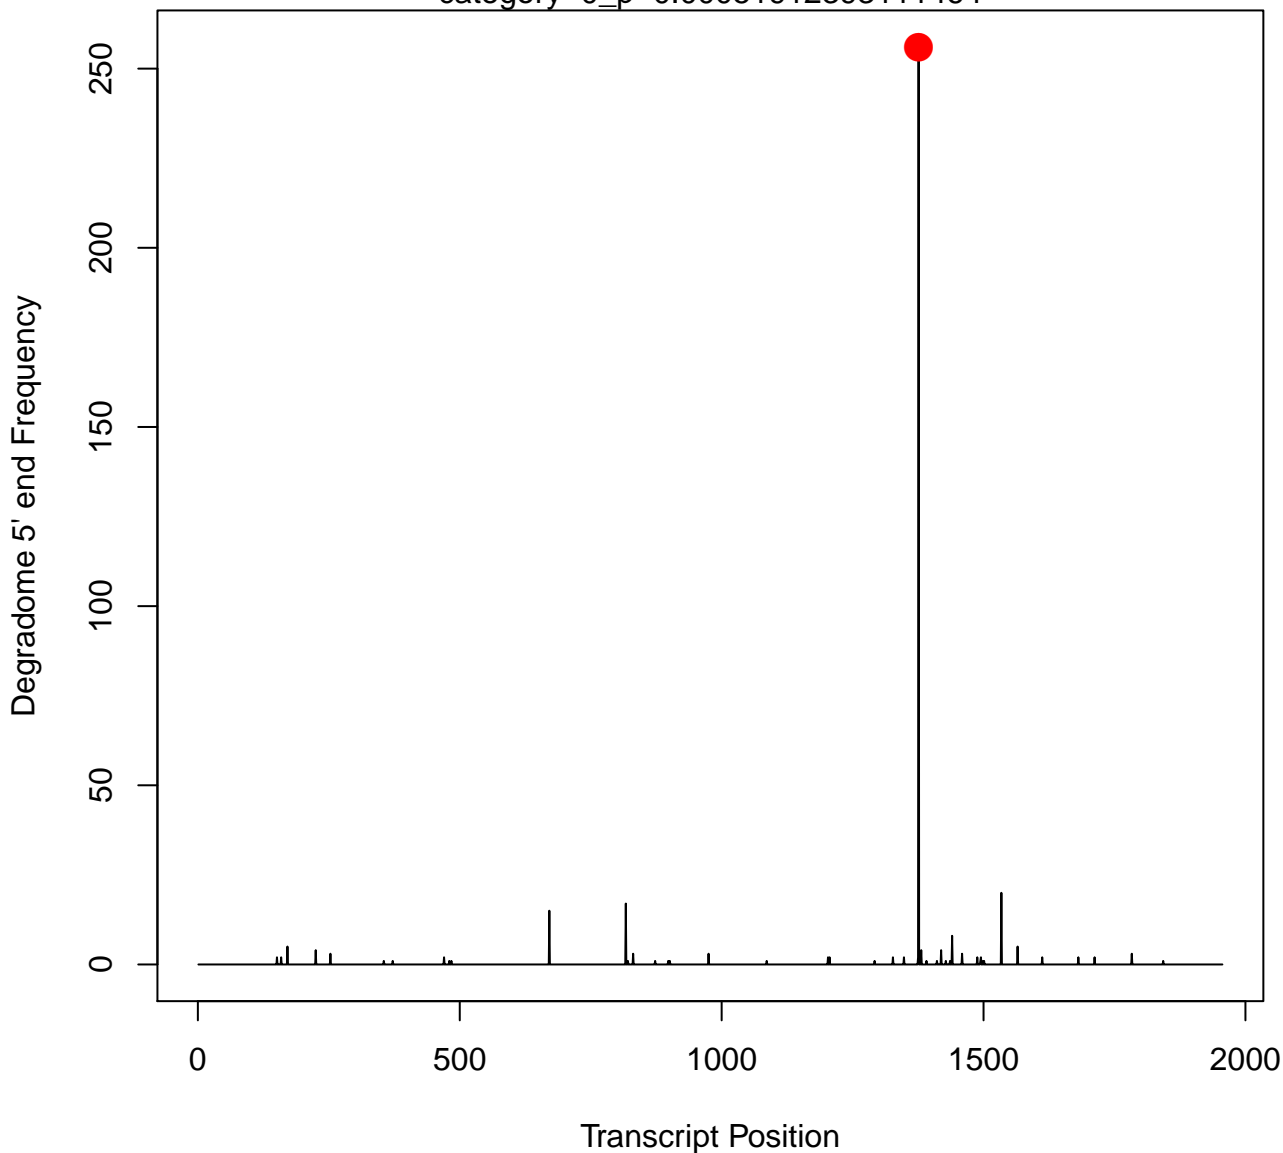

Supplement: Data_Sheet_1.zip [file Data_Sheet_1.zip]

**T=evm.model.LG04.3773\_Q=miRN14-5p\_S=419**

category=0\_p=0.00051912393111464

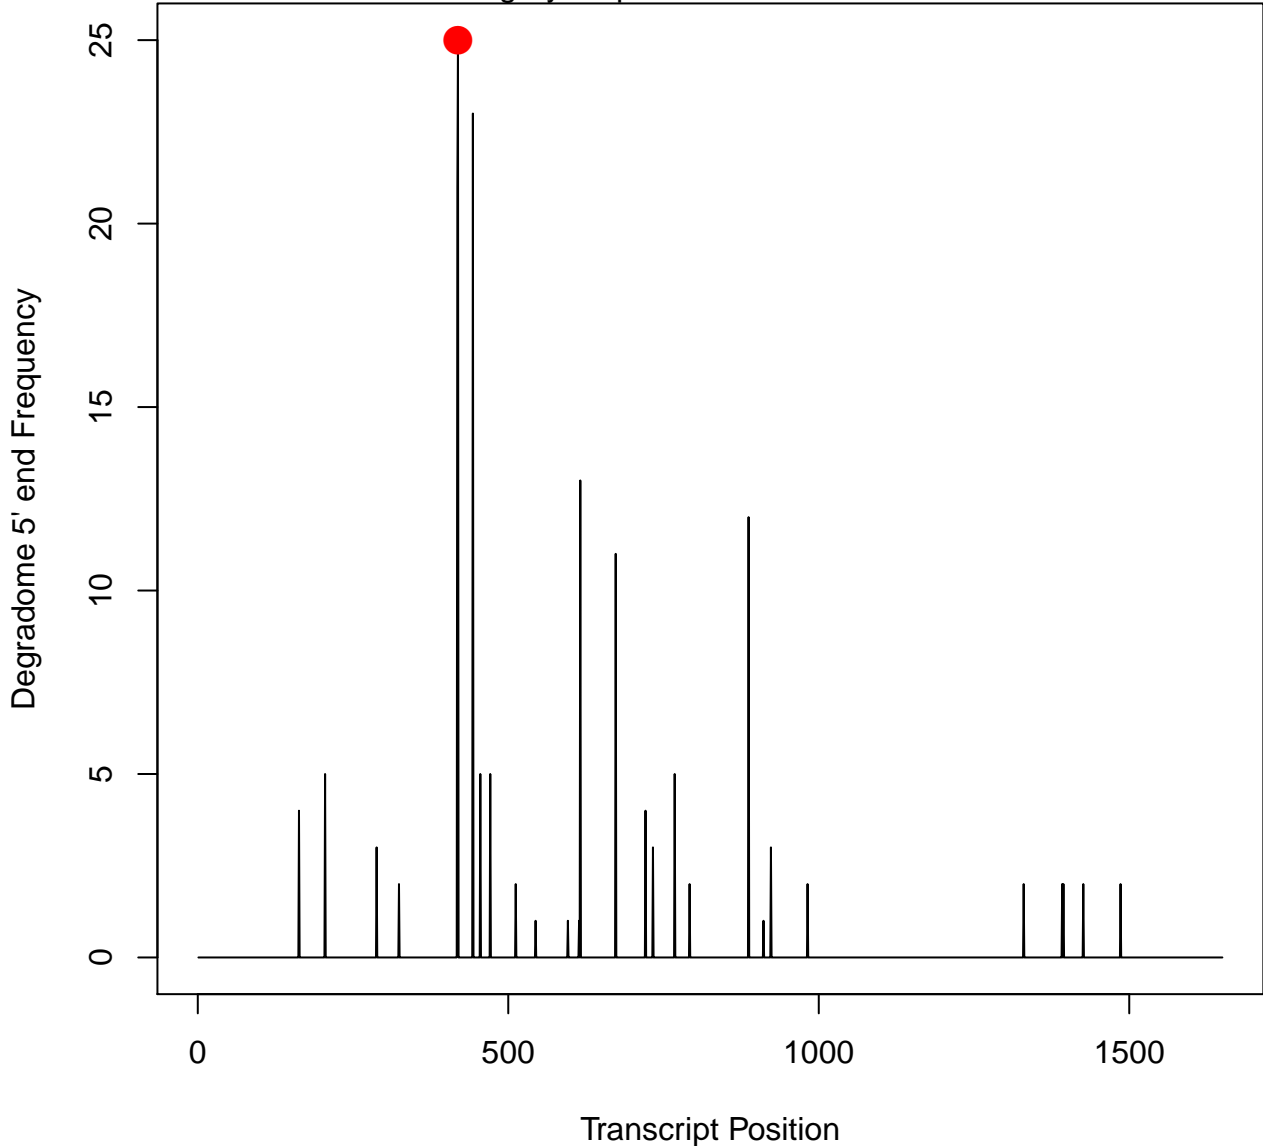

Supplement: Data_Sheet_1.zip [file Data_Sheet_1.zip]

**T=evm.model.LG06.2004\_Q=miR396a-5p\_S=572**

category=0\_p=0.00878855119413746

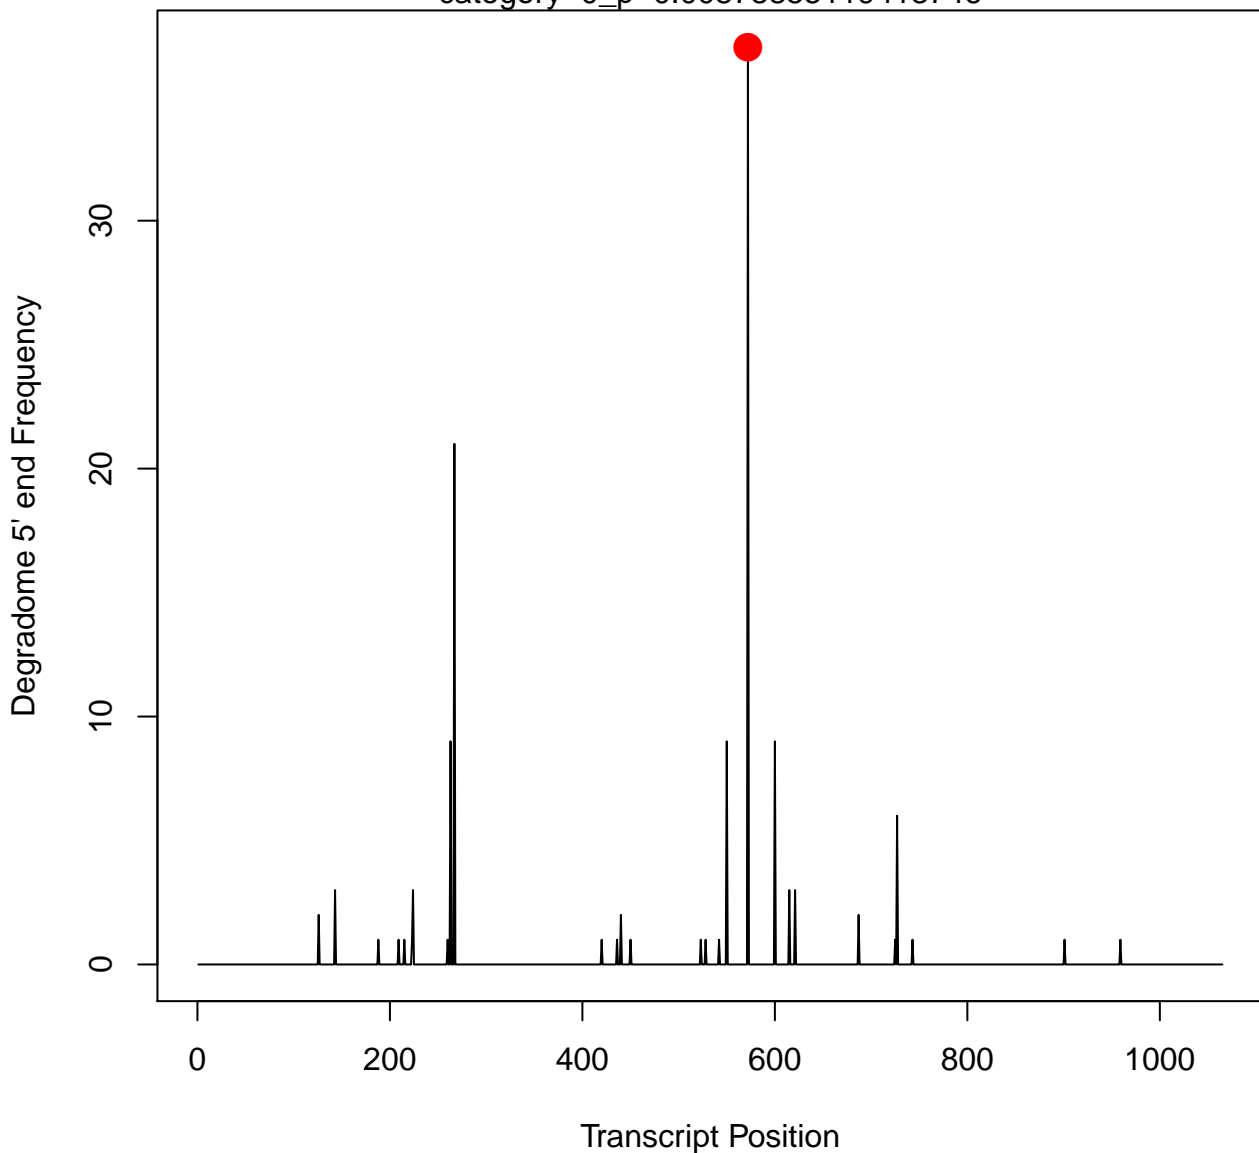

Supplement: Data_Sheet_1.zip [file Data_Sheet_1.zip]

**T=evm.model.LG05.234\_Q=miR396a-5p\_S=125**

category=1\_p=0.000532226253305179

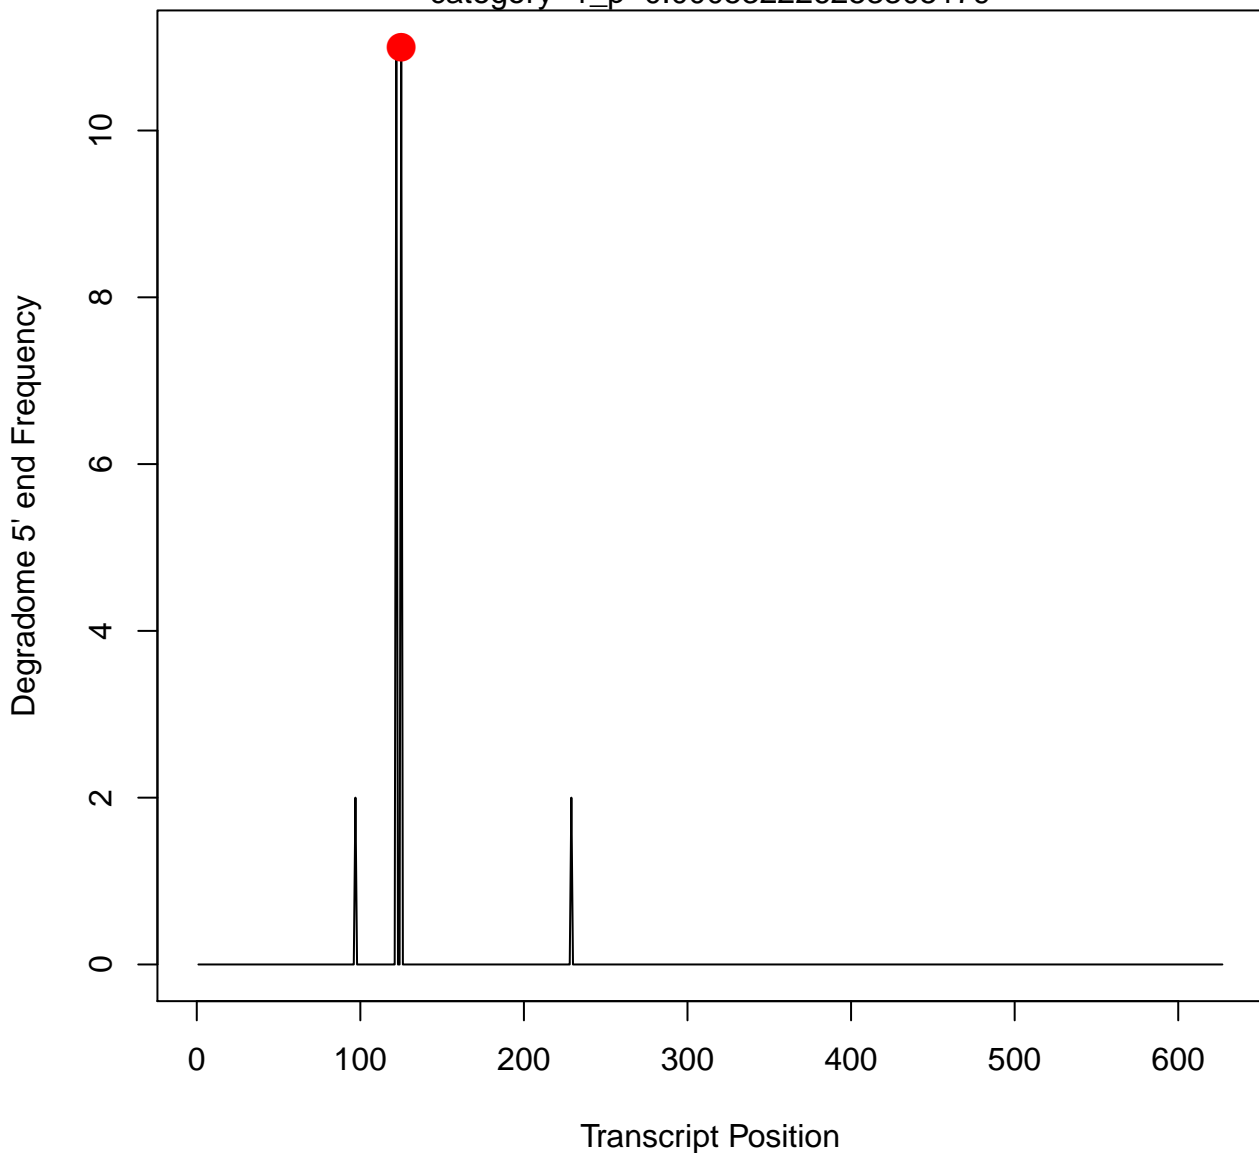

Supplement: Data_Sheet_1.zip [file Data_Sheet_1.zip]

**T=evm.model.LG05.3563\_Q=miRN14-5p\_S=104**

category=4\_p=0.0423765939260693

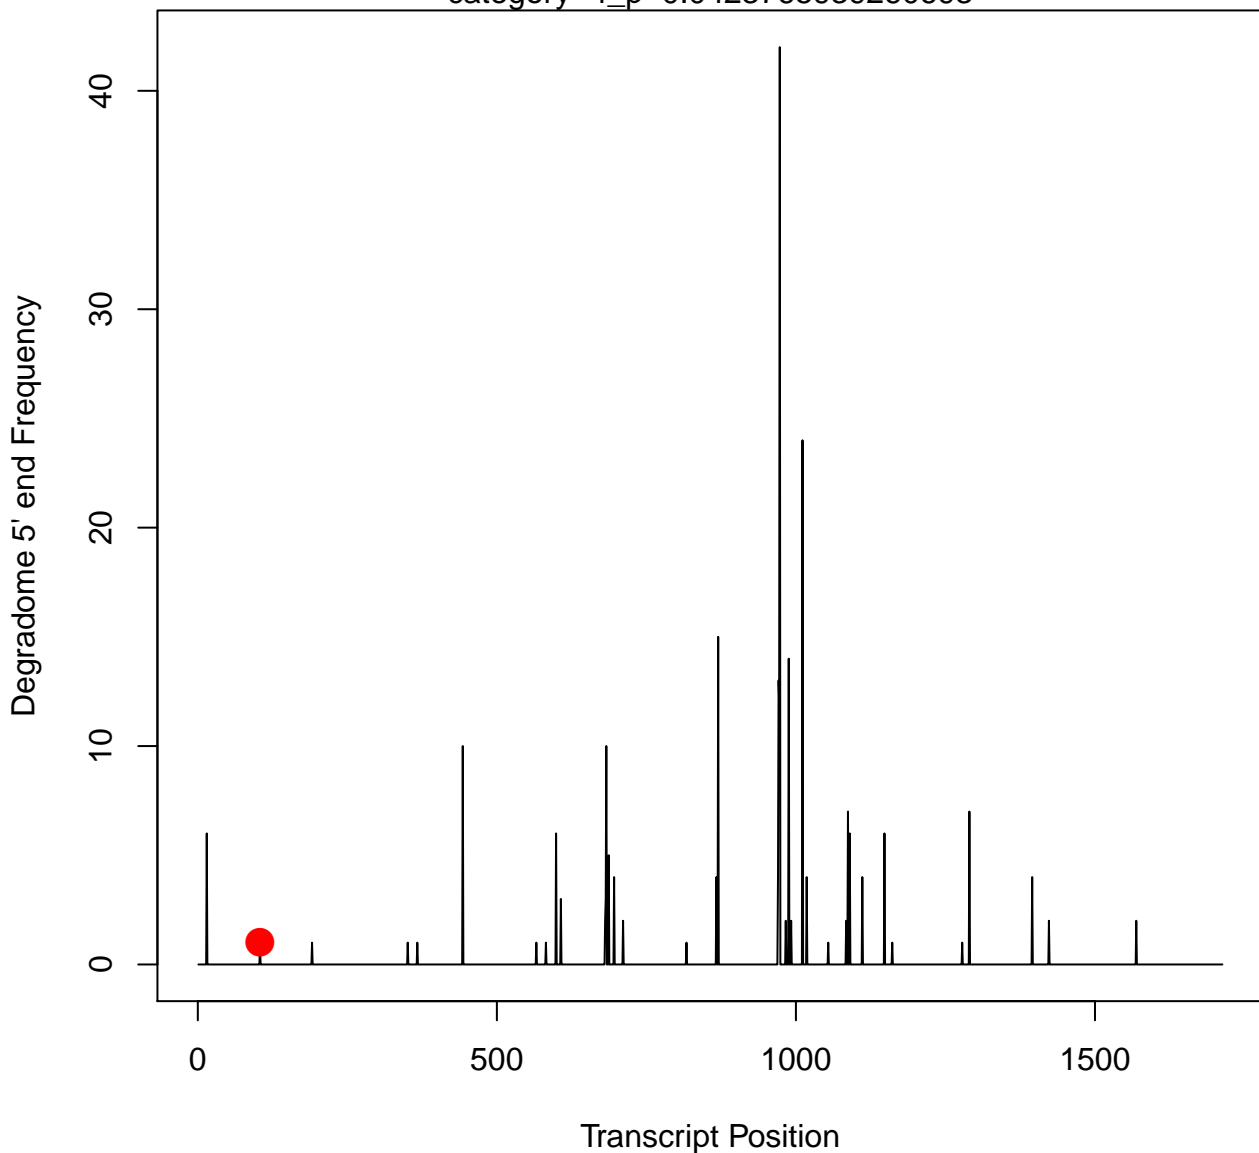

Supplement: Data_Sheet_1.zip [file Data_Sheet_1.zip]

**T=evm.model.LG06.509\_Q=miR164c-5p\_S=655**

category=2\_p=0.0260209548157995

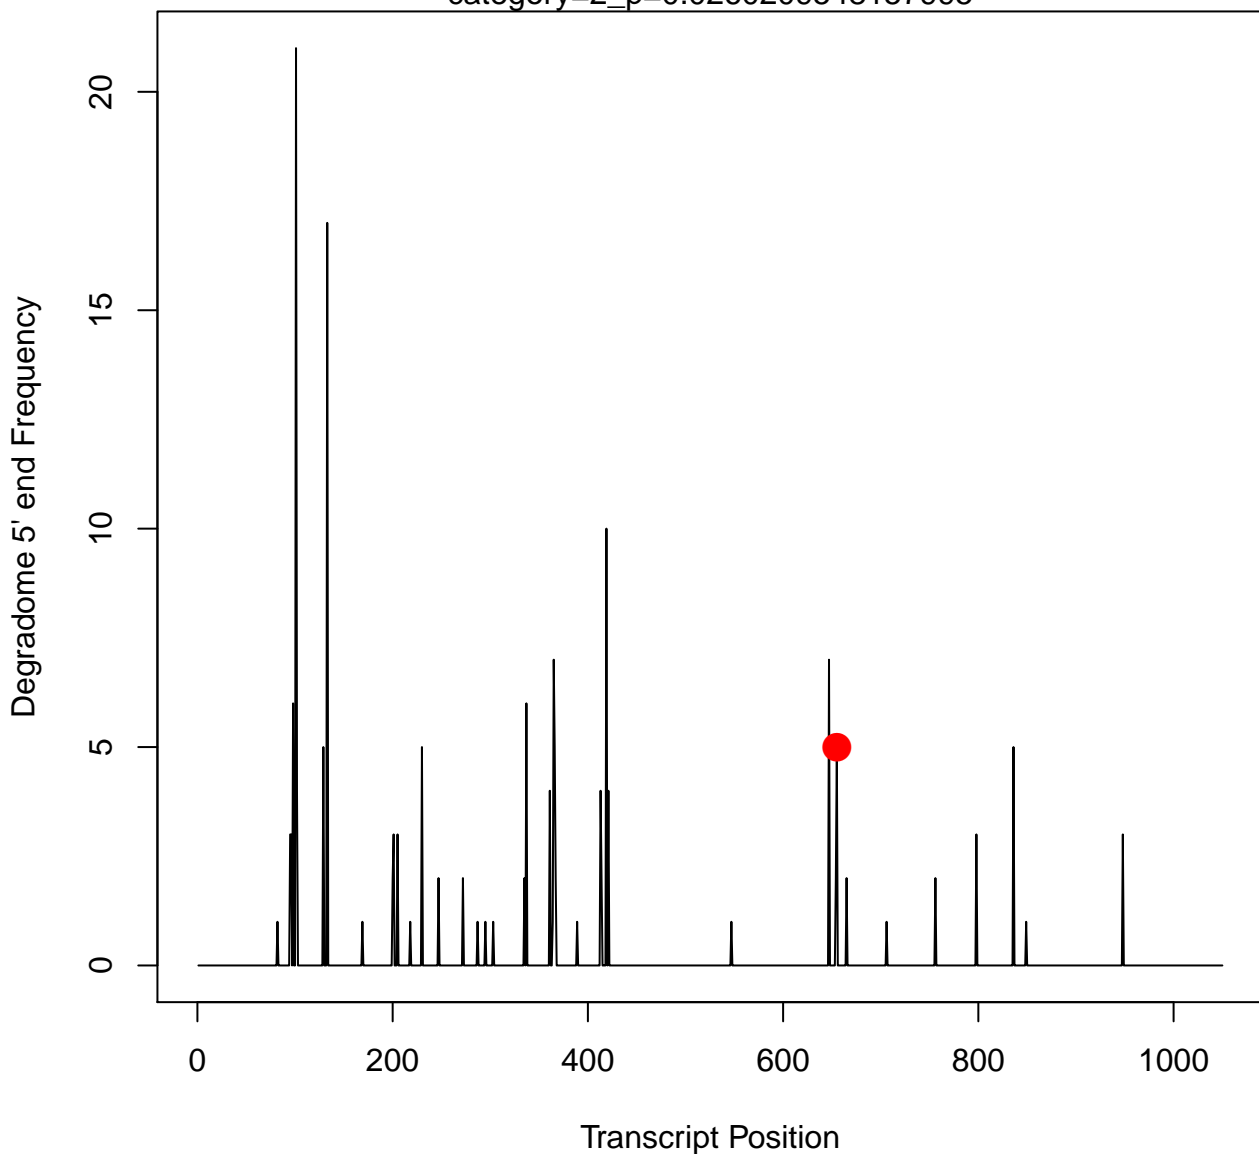

Supplement: Data_Sheet_1.zip [file Data_Sheet_1.zip]

**T=evm.model.LG02.237\_Q=miR167e-5p\_S=102**

category=1\_p=0.0205482959025826

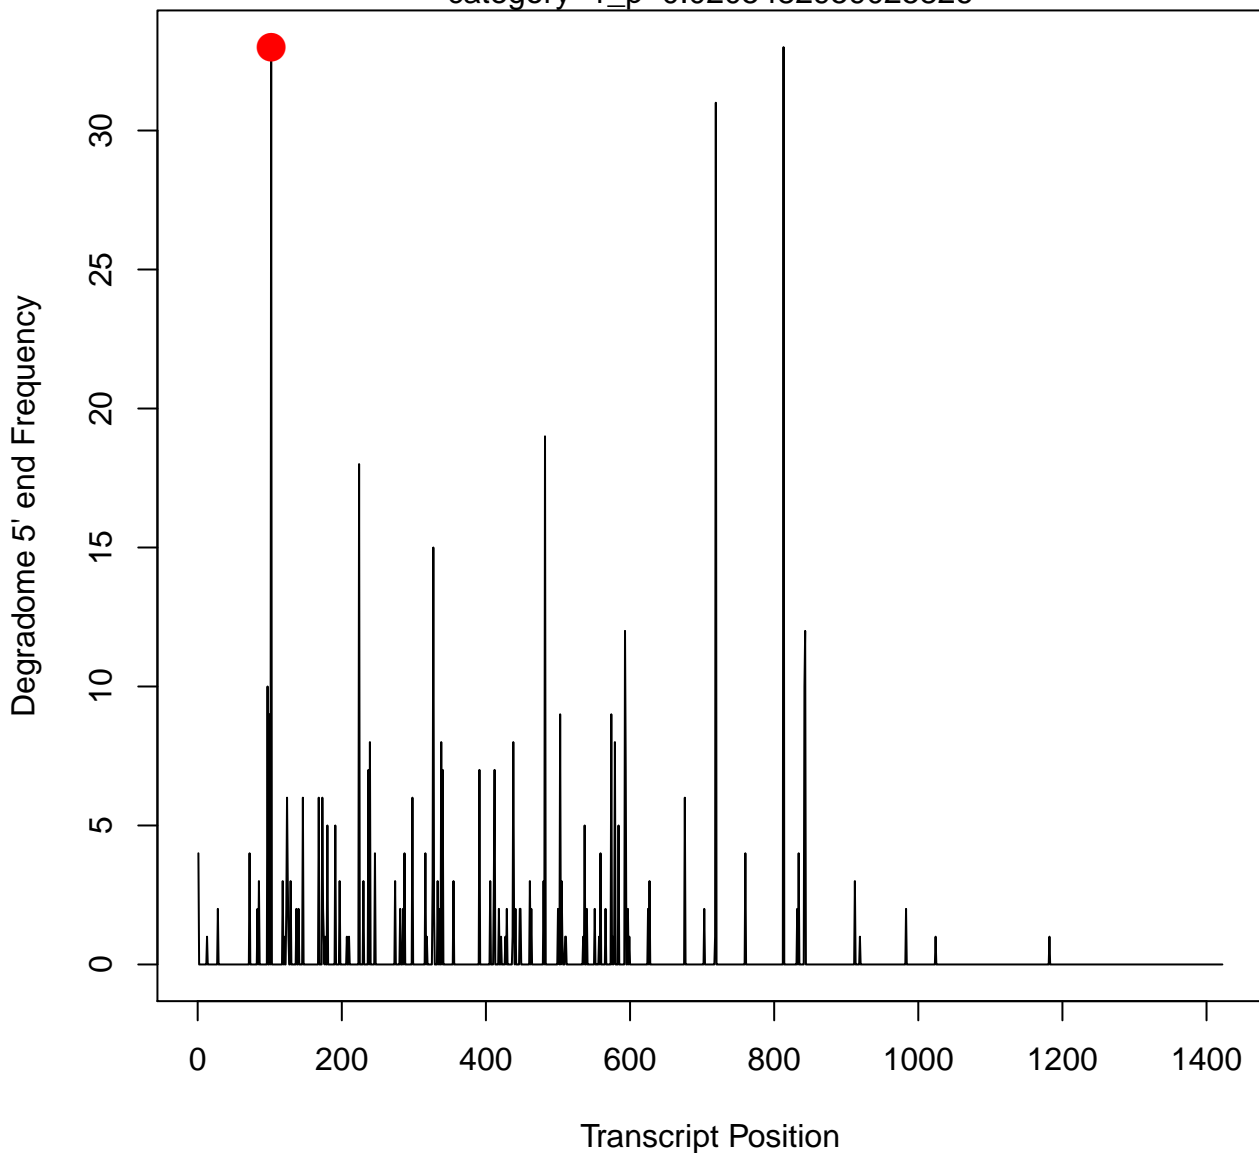

Supplement: Data_Sheet_1.zip [file Data_Sheet_1.zip]

**T=evm.model.LG02.2189\_Q=miR166j-3p\_S=562**

category=0\_p=0.00155656346427469

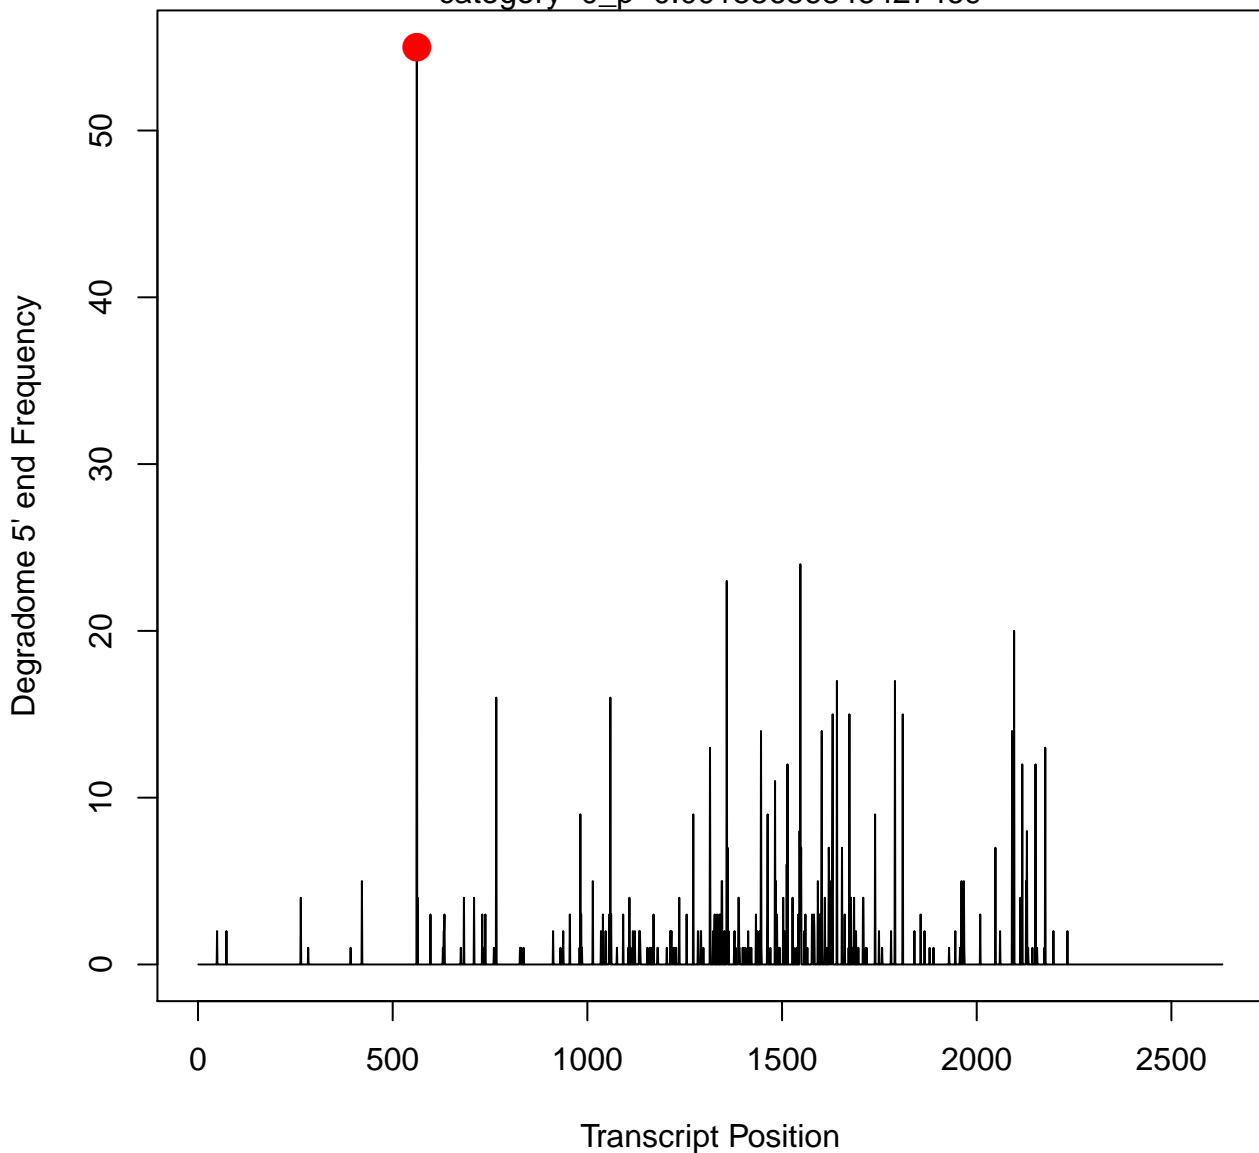

Supplement: Data_Sheet_1.zip [file Data_Sheet_1.zip]

**T=evm.model.LG04.3713\_Q=miR168a-5p\_S=424**

category=2\_p=0.00874999063480097

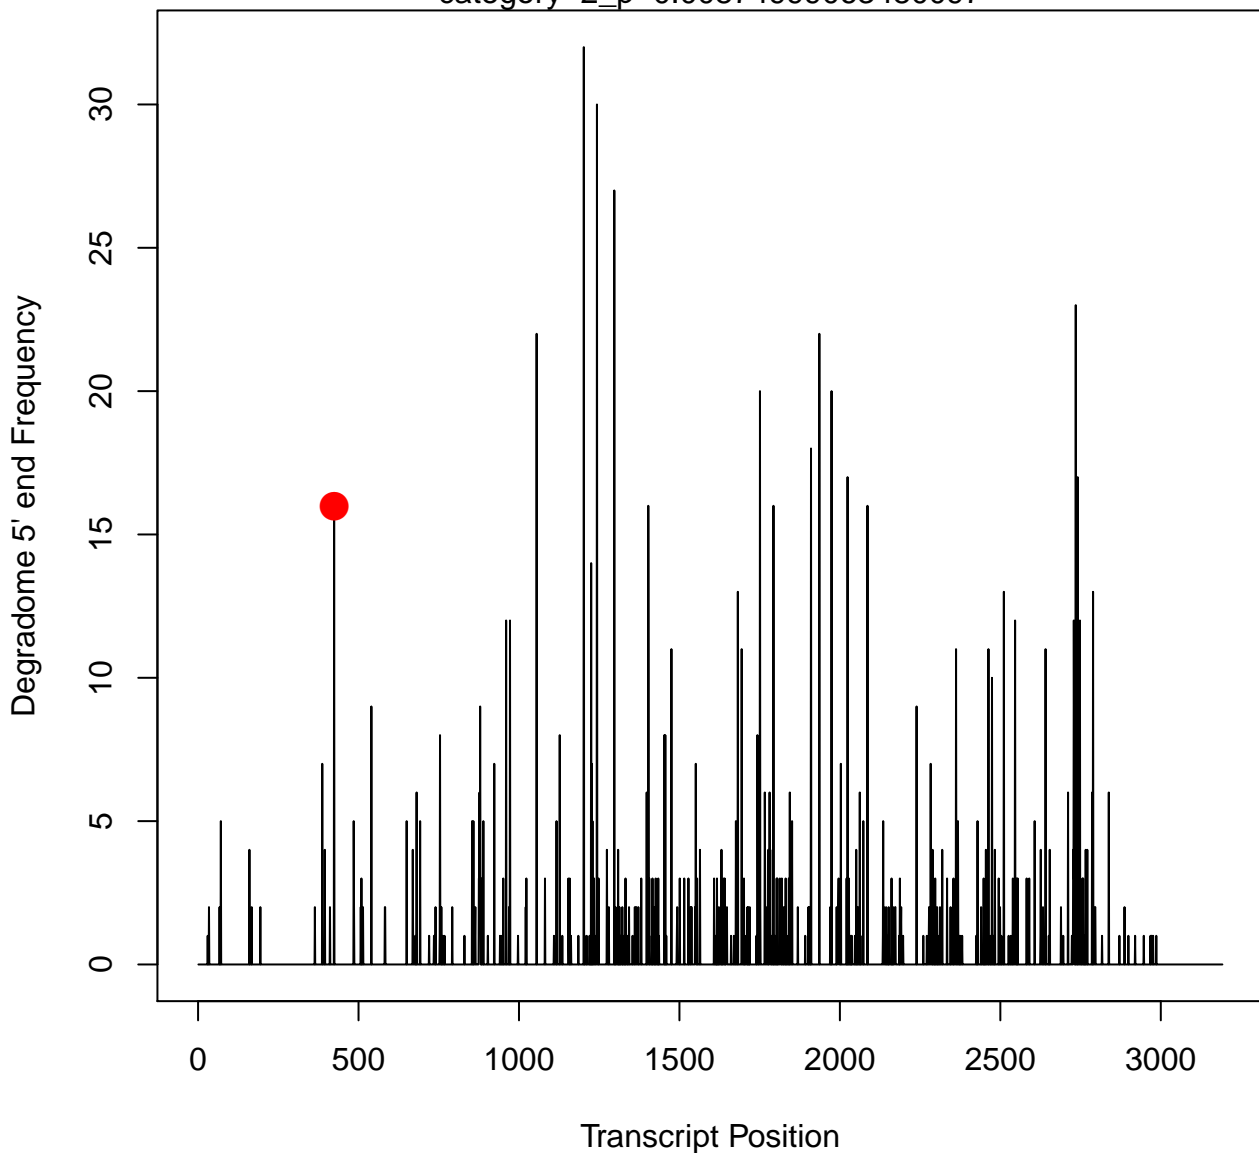

Supplement: Data_Sheet_1.zip [file Data_Sheet_1.zip]

**T=evm.model.LG01.3873\_Q=miR156c-5p\_S=747**

category=4\_p=0.00862274555333054

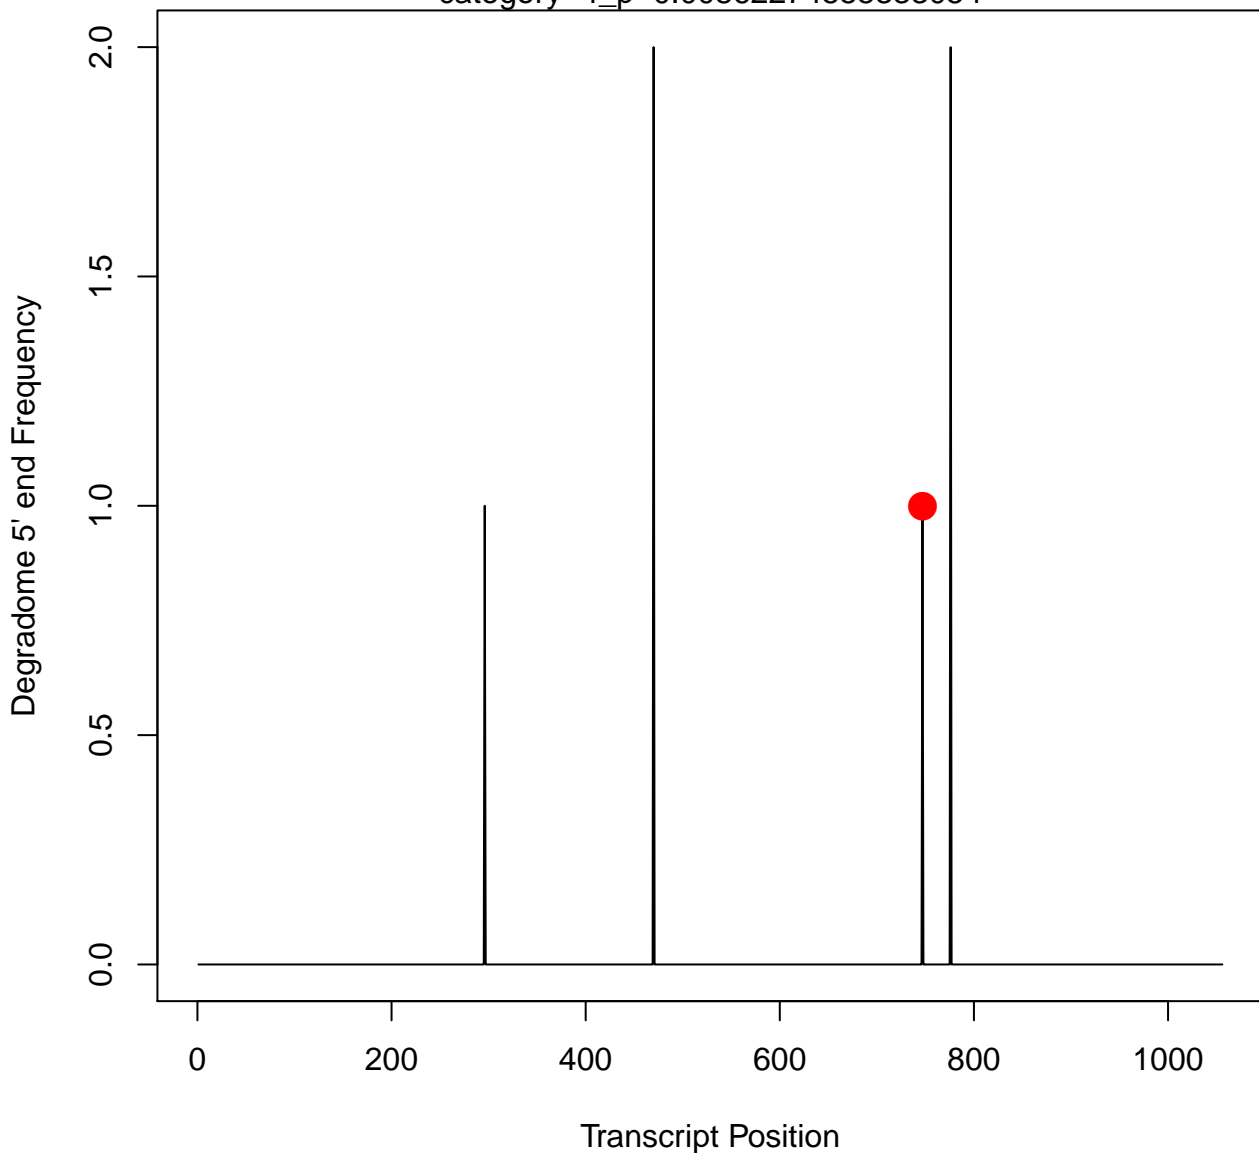

Supplement: Data_Sheet_1.zip [file Data_Sheet_1.zip]

**T=evm.model.LG04.896\_Q=miR396b-5p\_S=374**

category=0\_p=0.00311070403873104

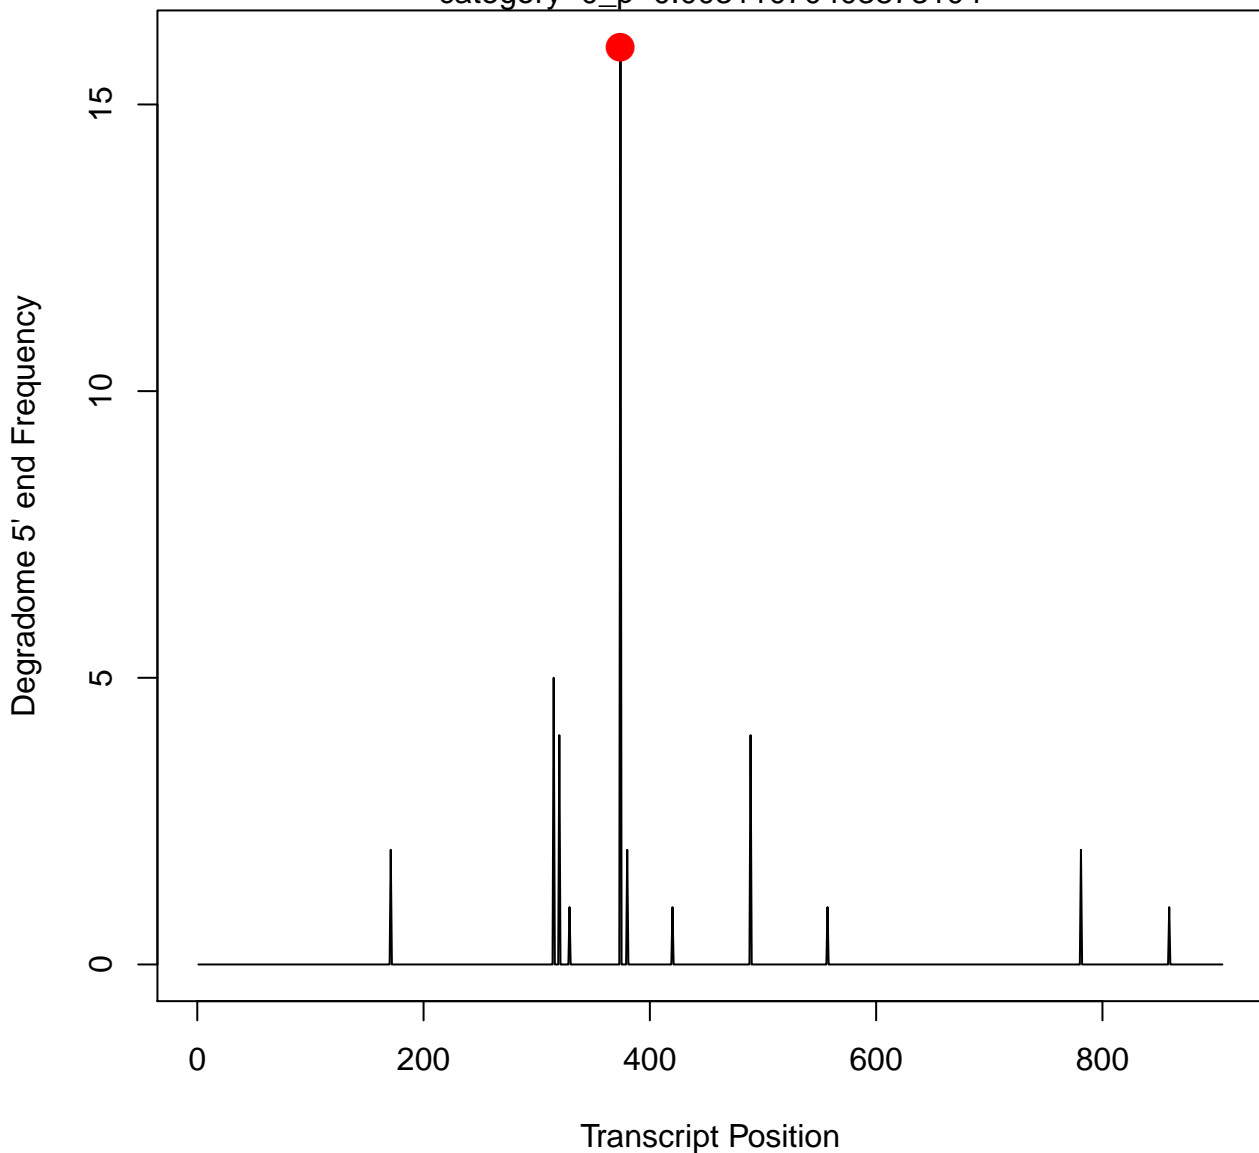

Supplement: Data_Sheet_1.zip [file Data_Sheet_1.zip]

**T=evm.model.LG02.1585\_Q=miR396a-5p\_S=1671**

category=0\_p=0.016478990219059

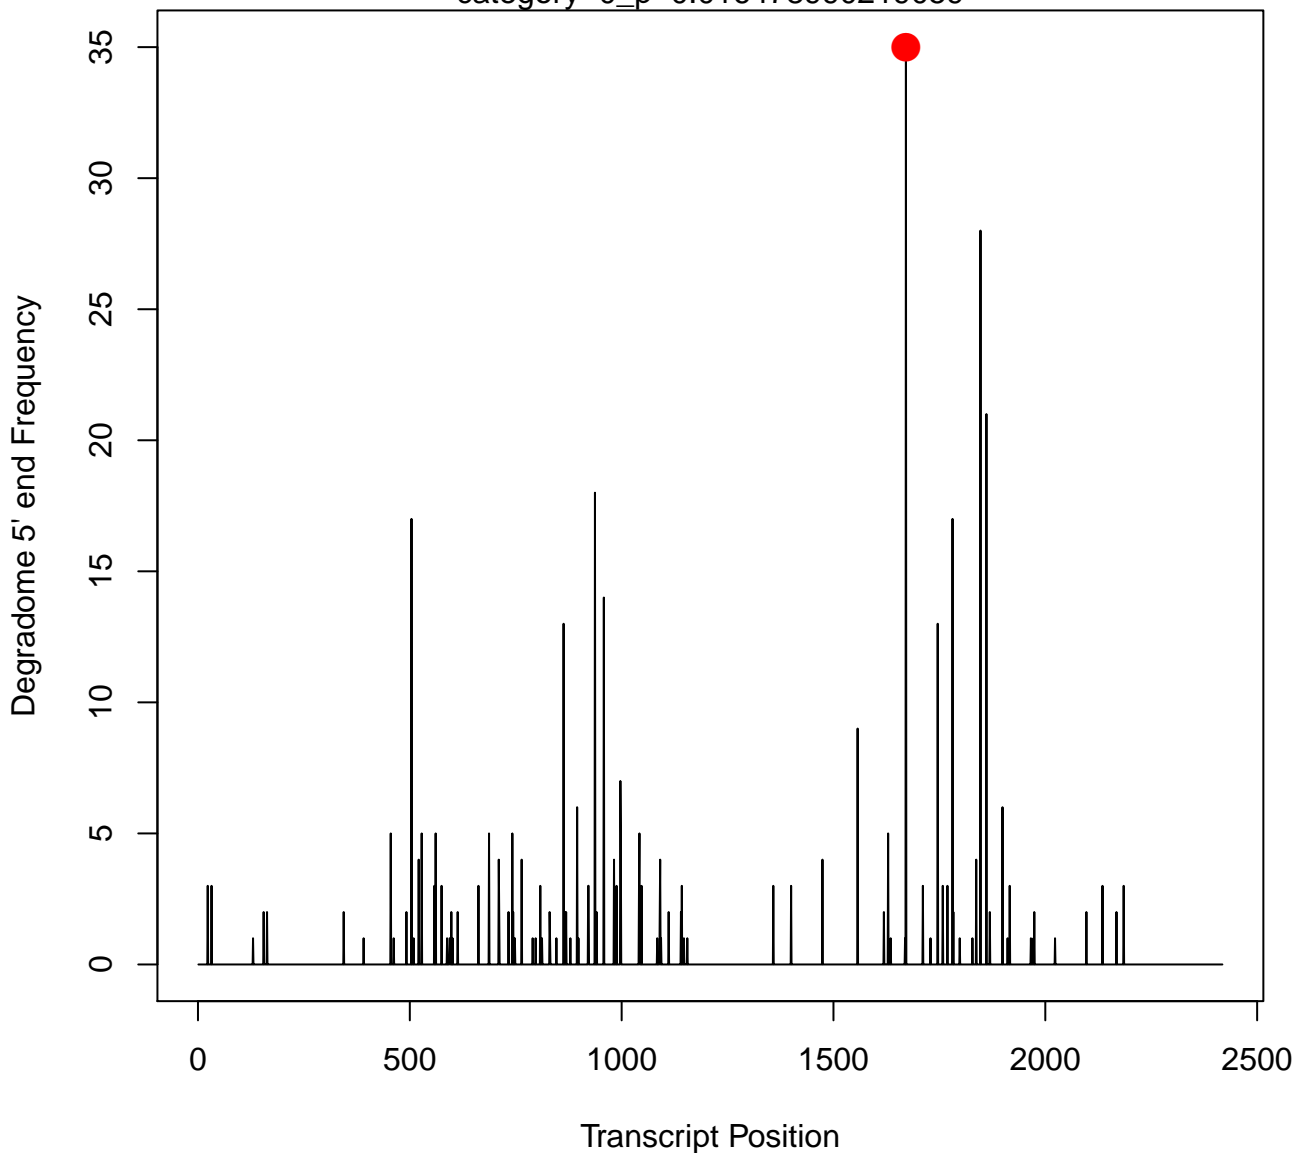

Supplement: Data_Sheet_1.zip [file Data_Sheet_1.zip]

**T=evm.model.LG06.3489\_Q=miRN3-5p\_S=86**

category=0\_p=0.00051912393111464

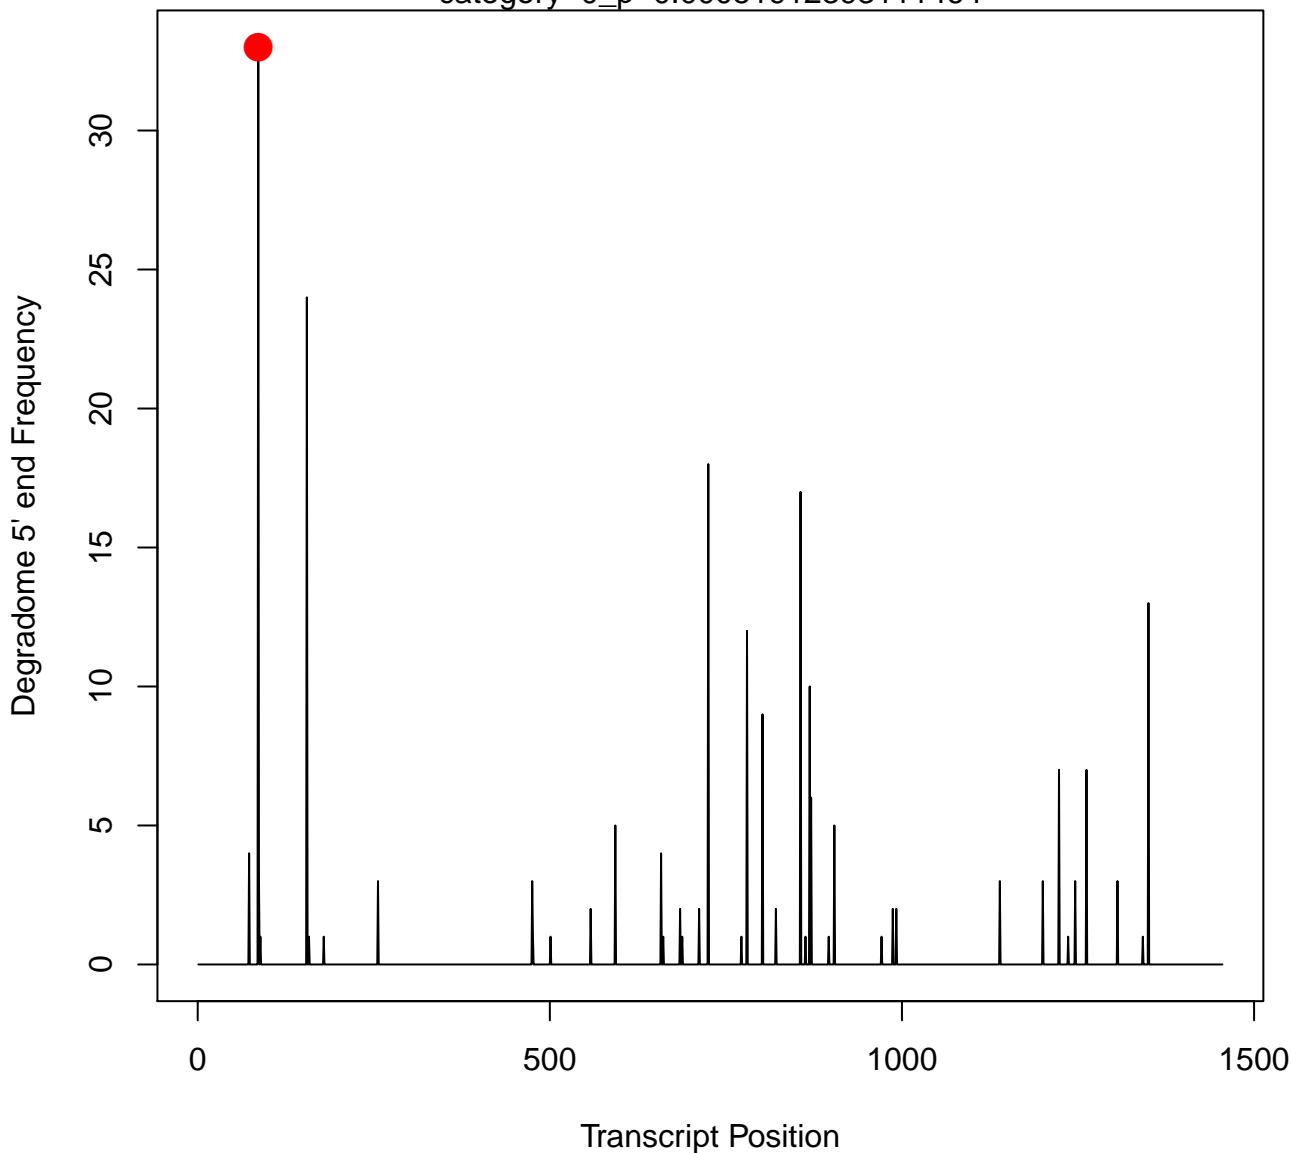

Supplement: Data_Sheet_1.zip [file Data_Sheet_1.zip]

**T=evm.model.LG01.5083\_Q=miR393a-5p\_S=770**

category=0\_p=0.0144340598055845

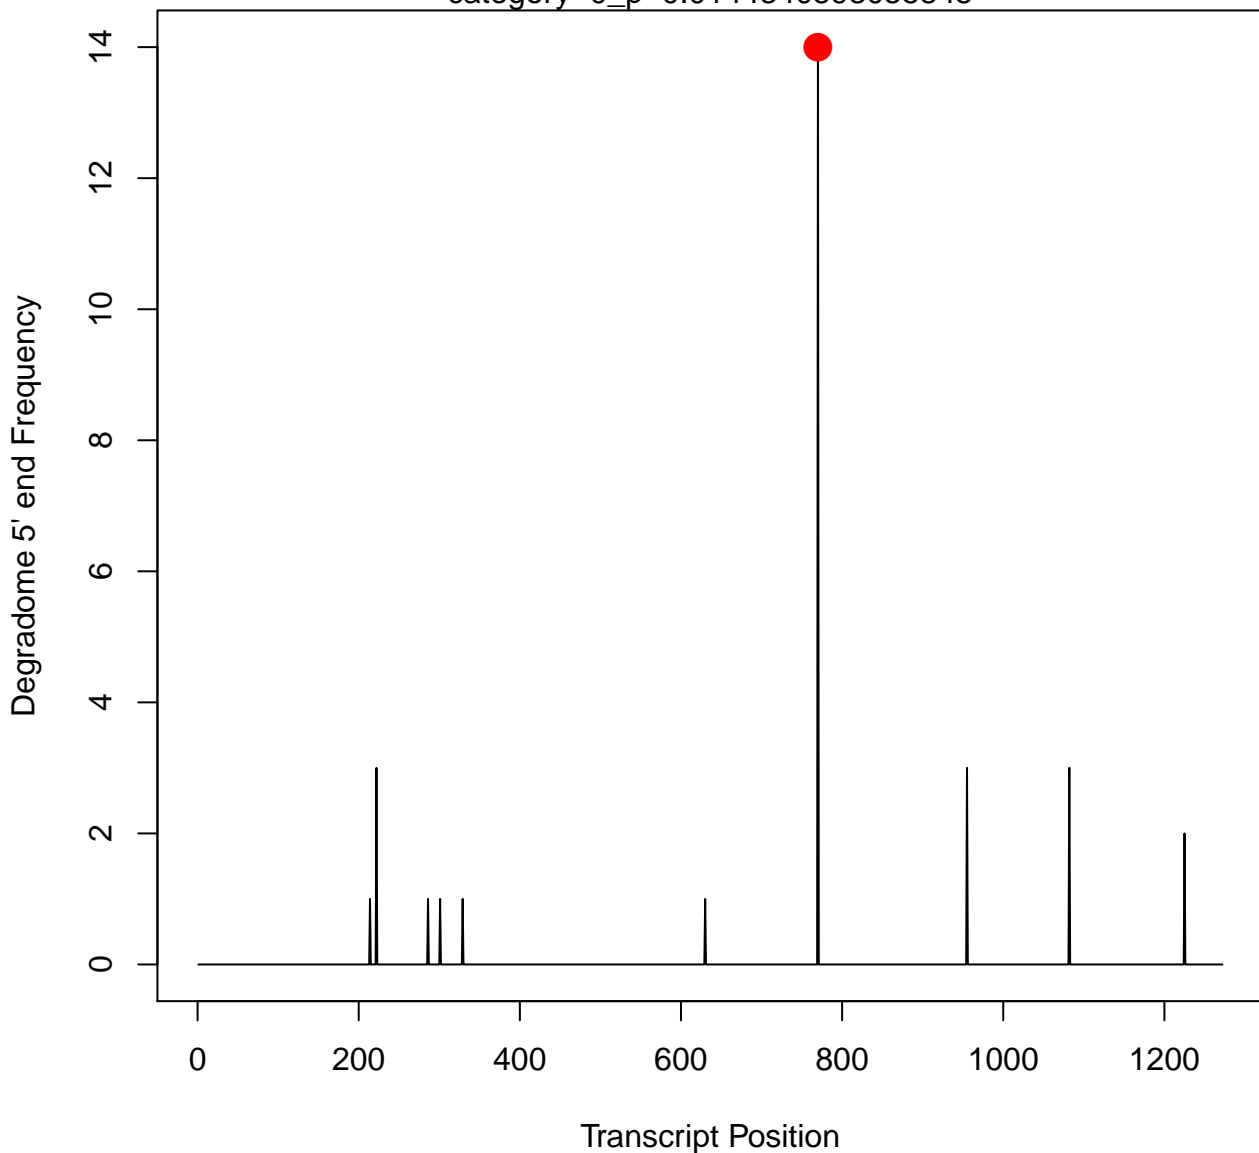

Supplement: Data_Sheet_1.zip [file Data_Sheet_1.zip]

**T=evm.model.LG02.4741\_Q=miRN8-5p\_S=316**

category=2\_p=0.0345432623396535

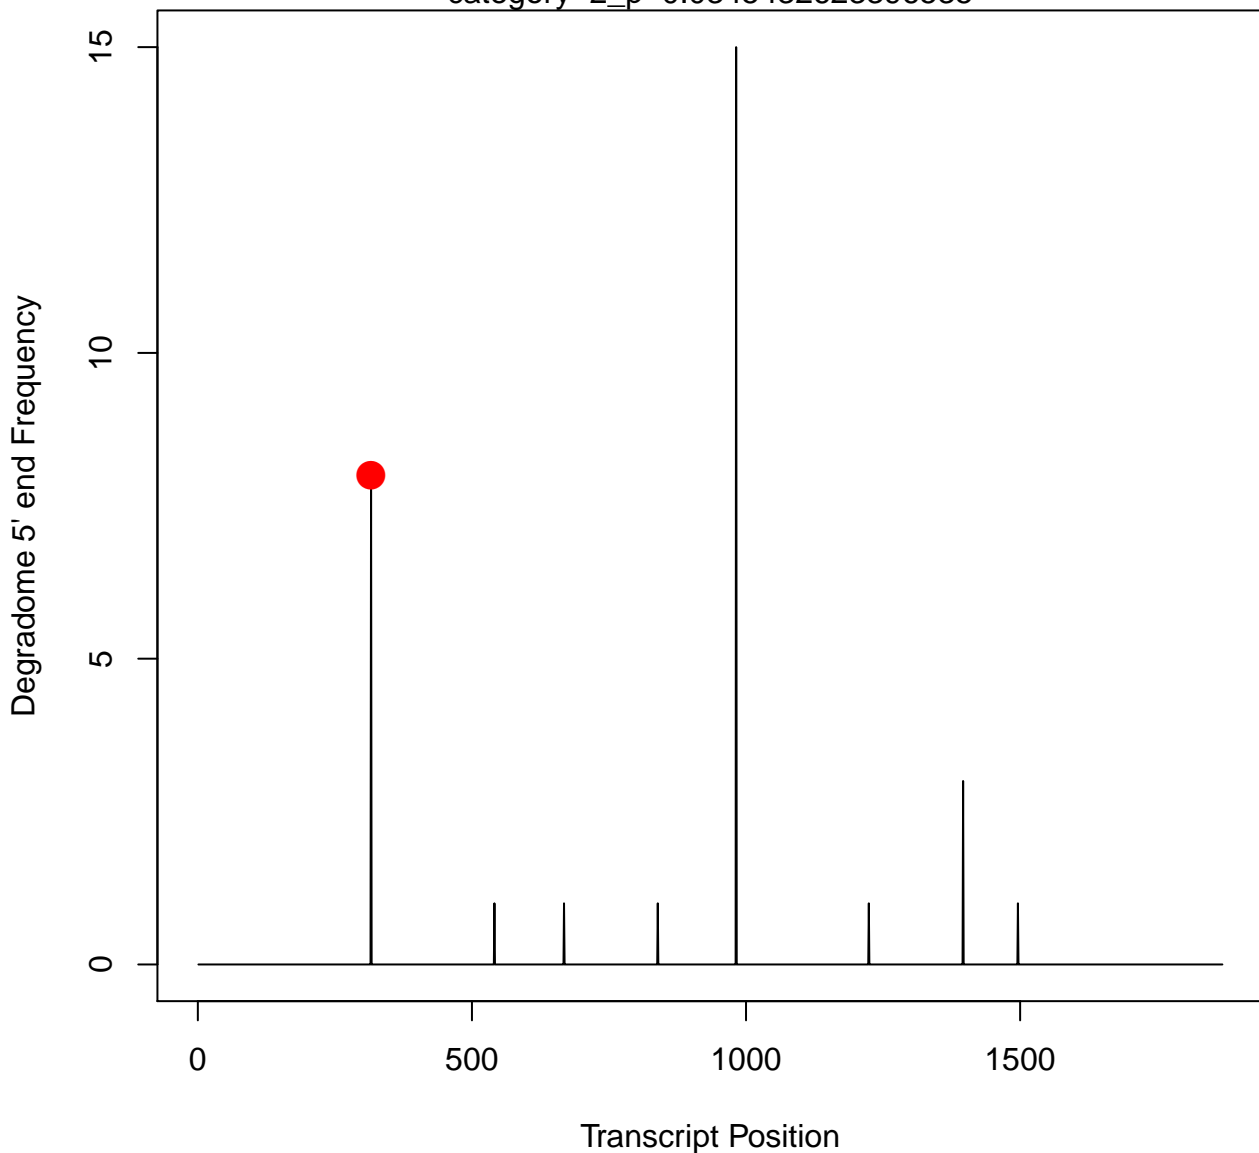

Supplement: Data_Sheet_1.zip [file Data_Sheet_1.zip]

**T=evm.model.LG07.3497\_Q=miR166i-3p\_S=549**

category=4\_p=0.00862274555333054

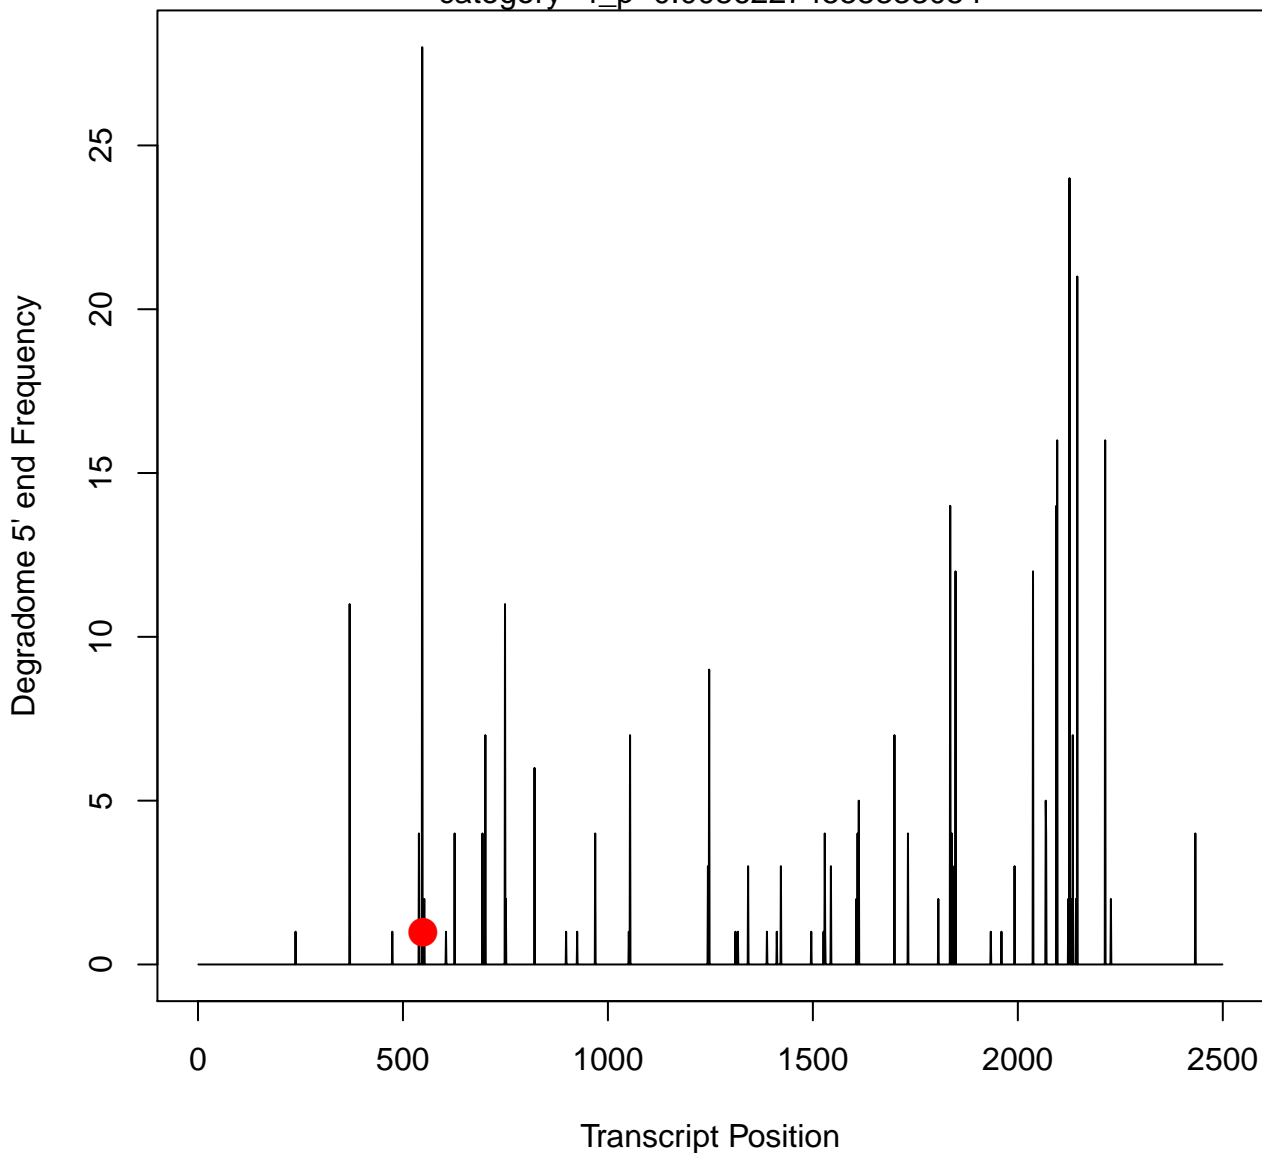

Supplement: Data_Sheet_1.zip [file Data_Sheet_1.zip]

**T=evm.model.LG04.4379\_Q=miR160a-5p\_S=1265**

category=0\_p=0.00103797837257324

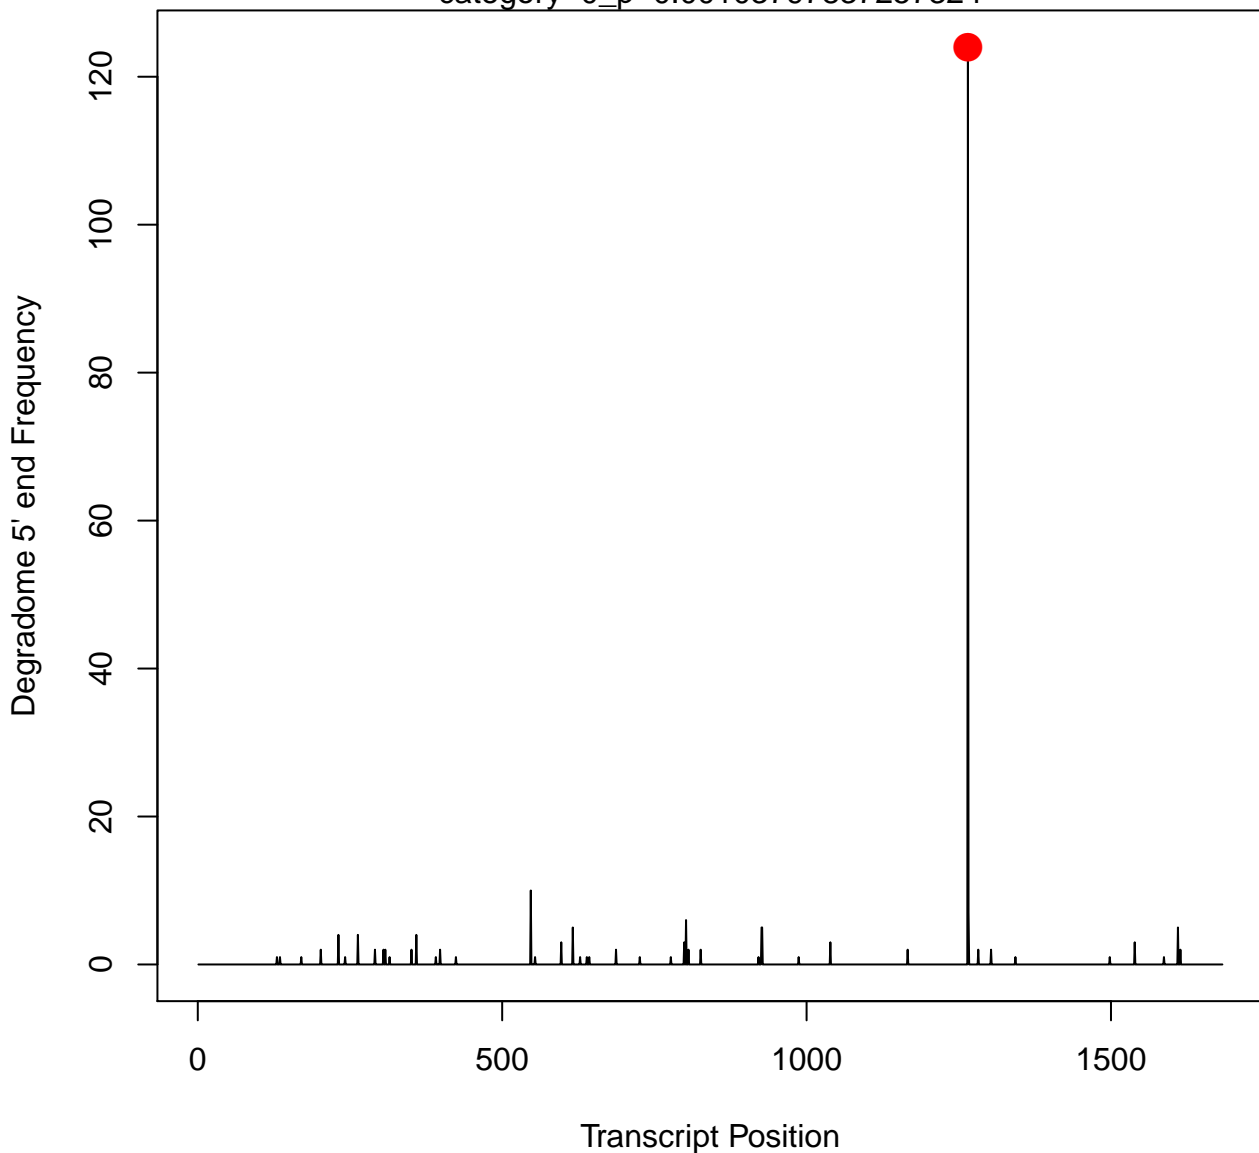

Supplement: Data_Sheet_1.zip [file Data_Sheet_1.zip]

**T=evm.model.LG04.2726\_Q=miR394c-5p\_S=1123**

category=2\_p=0.0174234189334928

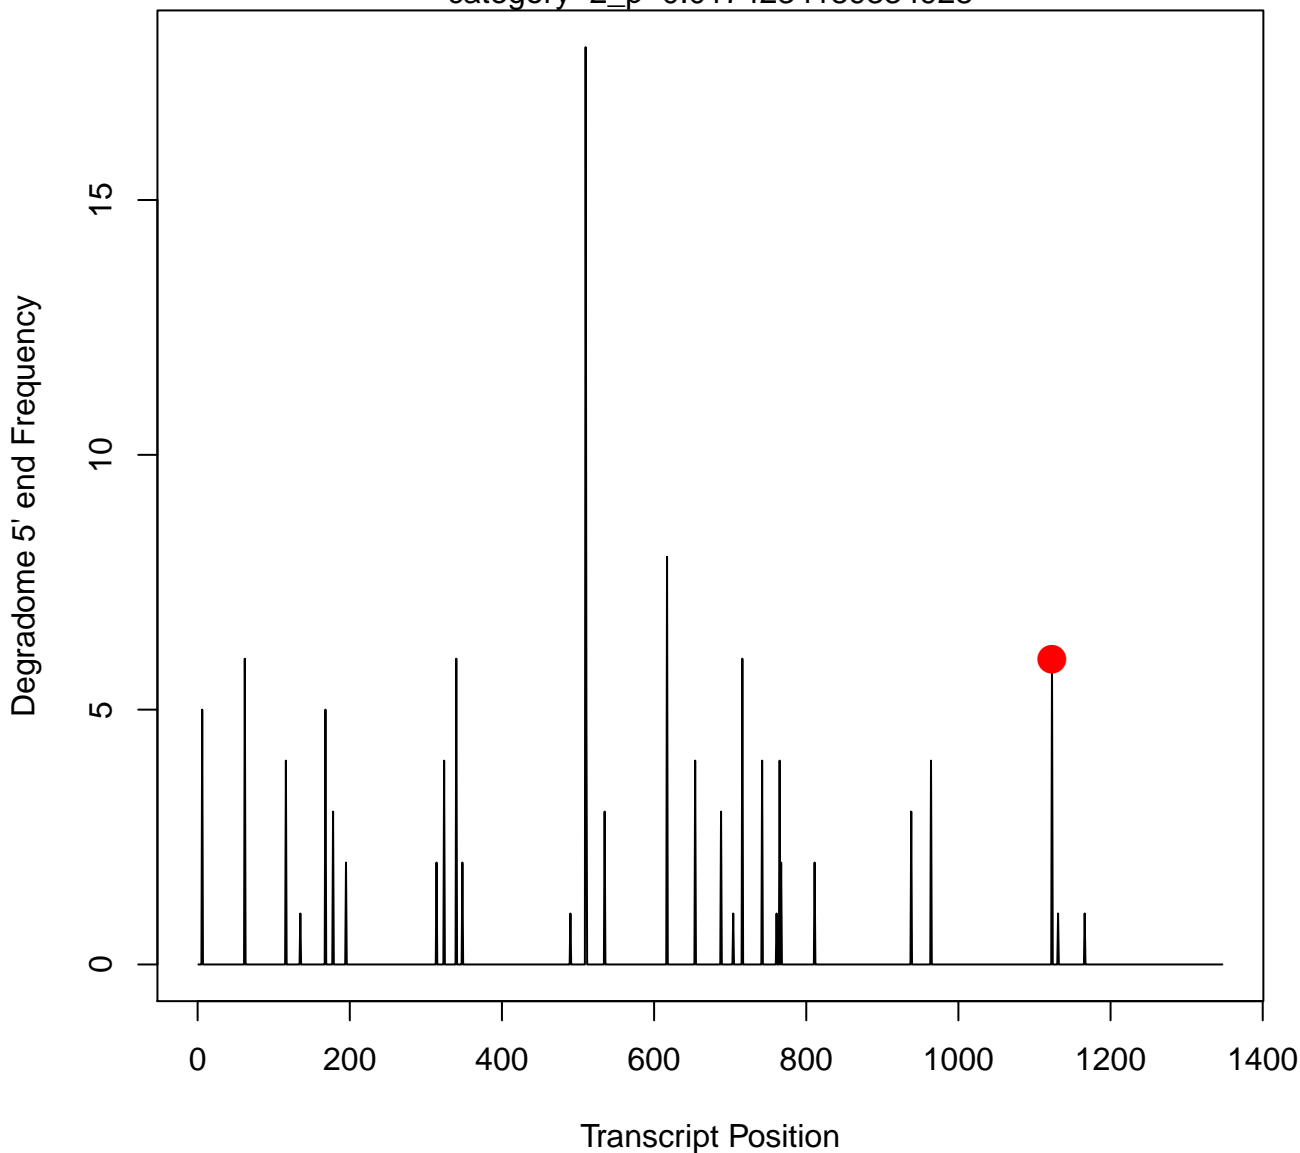

Supplement: Data_Sheet_1.zip [file Data_Sheet_1.zip]

**T=evm.model.LG02.1185\_Q=miR5041-3p\_S=685**

category=0\_p=0.0230957565261816

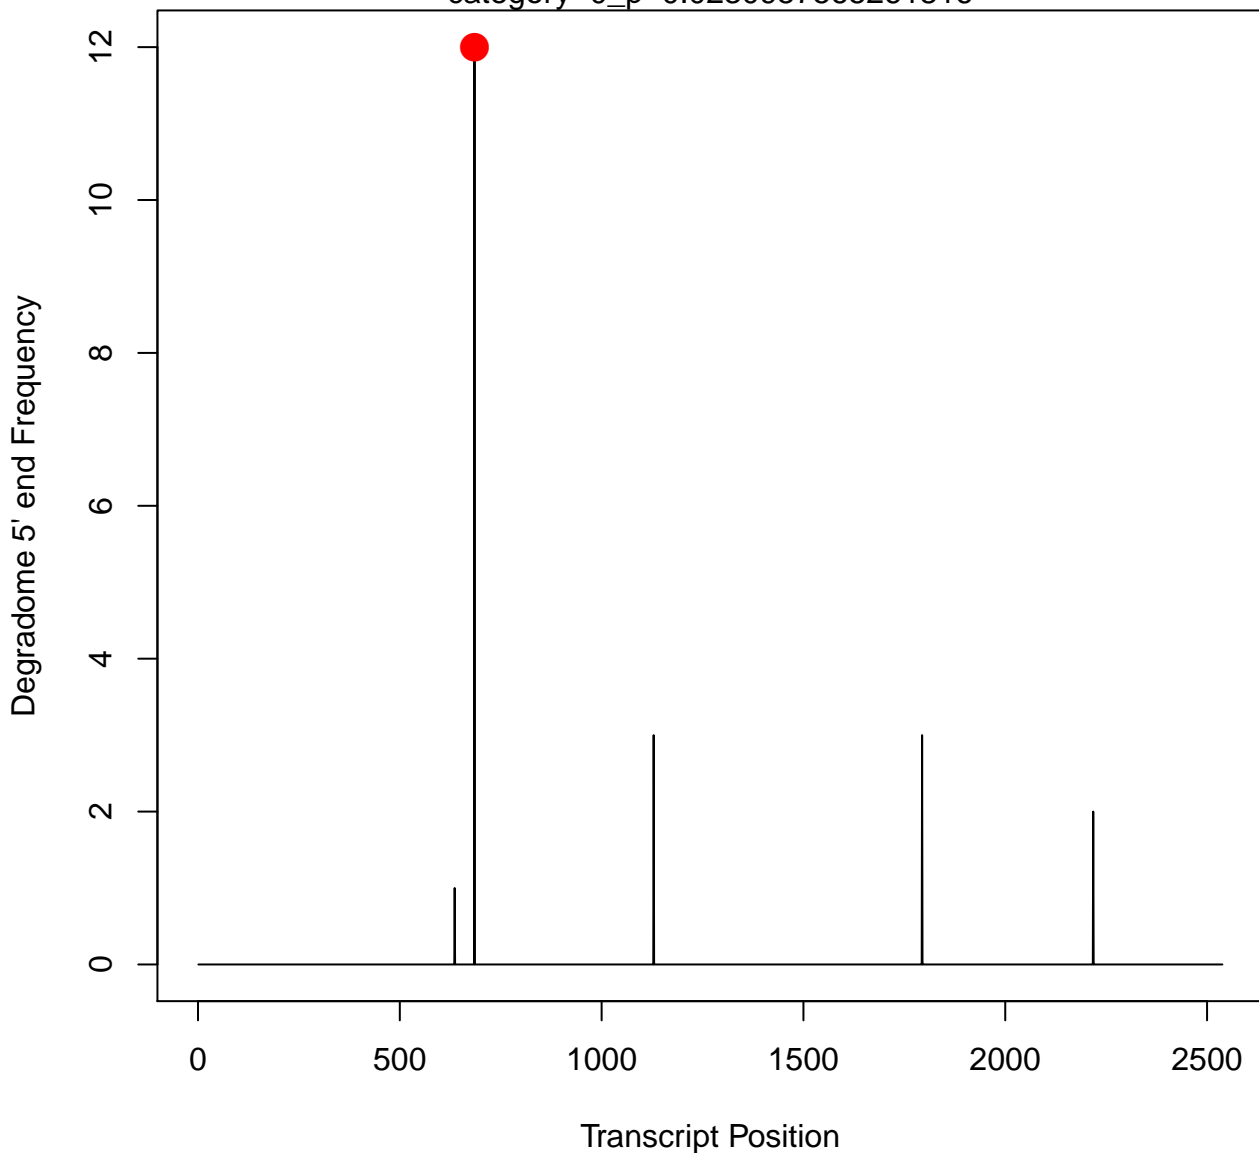

Supplement: Data_Sheet_1.zip [file Data_Sheet_1.zip]

**T=evm.model.LG05.2085\_Q=miR171c-3p\_S=548**

category=4\_p=0.00862274555333054

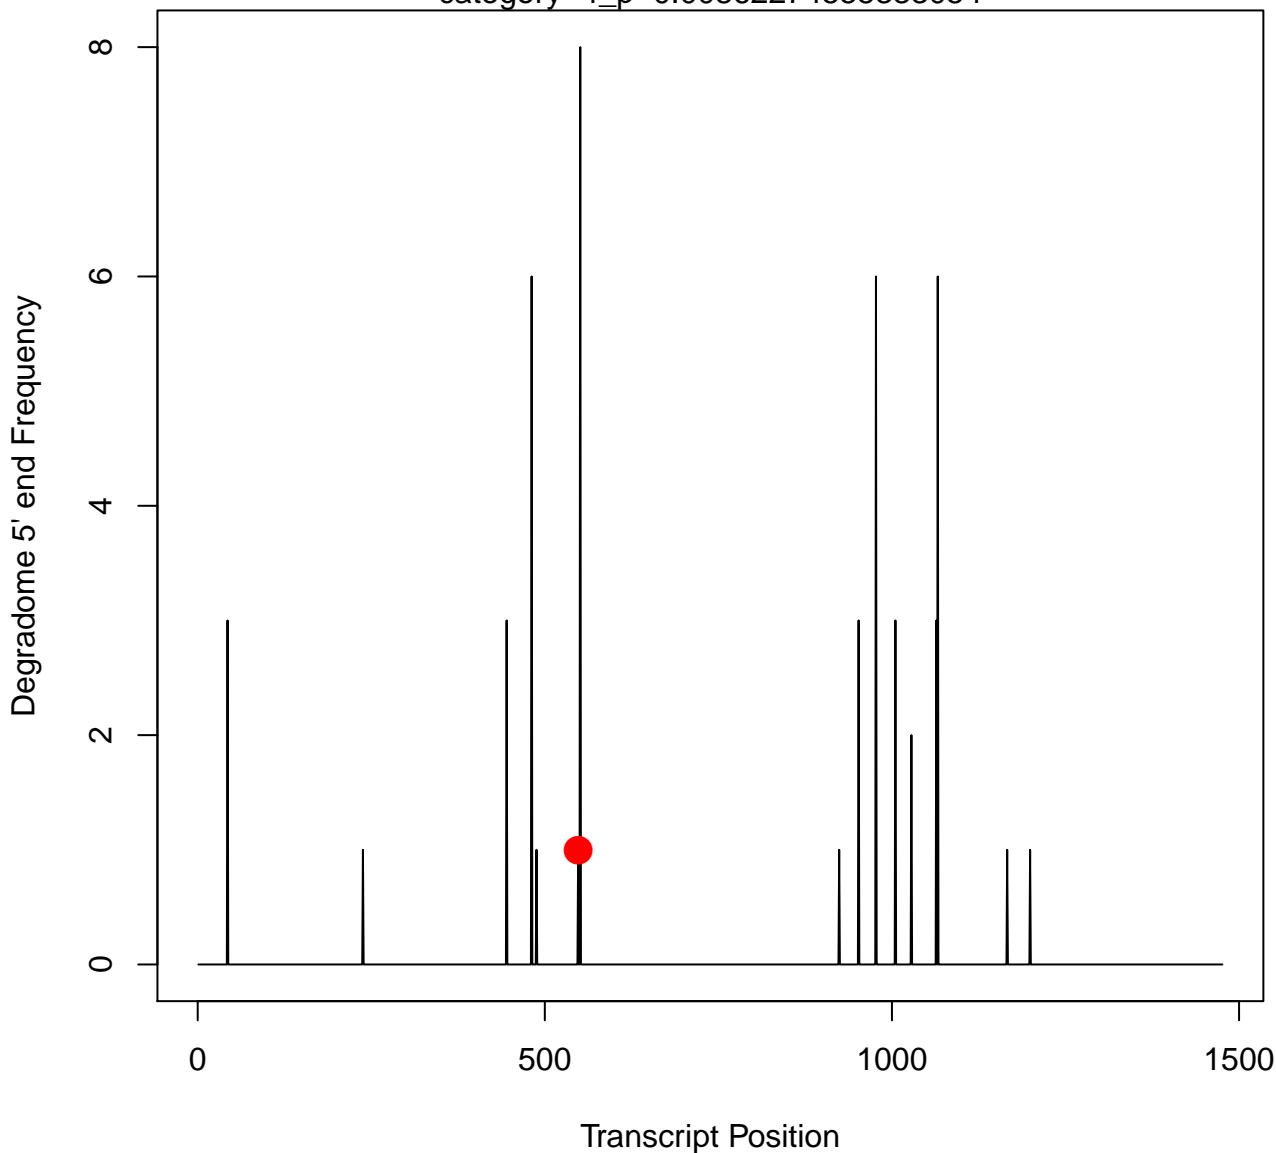

Supplement: Data_Sheet_1.zip [file Data_Sheet_1.zip]
